# Supplementary material for: Long-term passage impacts human dental pulp stem cell activities and cell response to drug addition in vitro
Source: PeerJ. 2024 Aug 23;12:e17913. doi: 10.7717/peerj.17913 (PMC11348901; doi:10.7717/peerj.17913)
Supplement: Data S1 — Cell shape parameter measurements. [file peerj-12-17913-s001.xlsx]

## Sheet: Proliferation
	Proliferation 1 day
OD		A0			A0.1			A0.5			A5			A10
	P5	P10	P15	P5	P10	P15	P5	P10	P15	P5	P10	P15	P5	P10	P15
	0.5365	0.3316	0.2519	0.3672	0.3372	0.2562	0.3838	0.3135	0.2097	0.4384	0.2867	0.1998	0.2711	0.1693	0.1845
	0.4999	0.3505	0.3342	0.472	0.3103	0.2401	0.4465	0.2792	0.1718	0.3988	0.2646	0.2109	0.4374	0.2273	0.1444
	0.4772	0.3299	0.2553	0.4158	0.3206	0.1653	0.3487	0.3126	0.1837	0.379	0.2698	0.1412	0.3456	0.261	0.1943
	0.5355	0.3403	0.2597	0.5448	0.2937	0.197	0.6176	0.2742	0.1366	0.5119	0.2987	0.1484	0.3337	0.1305	0.0956
	Proliferation 3 day
OD		A0			A0.1			A0.5			A5			A10
	P5	P10	P15	P5	P10	P15	P5	P10	P15	P5	P10	P15	P5	P10	P15
	0.9972	0.7721	0.5868	1.0518	0.8267	0.4065	0.8324	0.6882	0.4158	0.4322	0.1981	0.1971	0.1364	0.1451	0.2197
	1.0634	0.6782	0.3687	1.1774	0.8479	0.3241	1.4587	0.6506	0.375	0.4108	0.1803	0.1772	0.1562	0.1138	0.1811
	1.5519	0.7704	0.4539	1.0698	0.733	0.3384	1.4174	0.6501	0.3769	0.5062	0.1877	0.1434	0.1934	0.137	0.19
	1.5174	0.743	0.3812	1.2313	0.5721	0.3985	1.062	0.5591	0.2946	0.431	0.1601	0.128	0.1758	0.1498	0.04
	Proliferation 7 day
OD		A0			A0.1			A0.5			A5			A10
	P5	P10	P15	P5	P10	P15	P5	P10	P15	P5	P10	P15	P5	P10	P15
	3.737	2.4	1.399	3.689	2.649	1.55	3.678	2.627	1.317	0.1005	0.0969	0.1145	0.0001	0.0152	0.0205
	3.7716	2.756	1.145	3.579	2.608	1.444	3.371	2.593	1.164	0.1643	0.1214	0.1093	0.0202	0.007	0.0181
	3.7716	2.864	1.243	3.589	2.534	1.386	3.598	2.589	1.377	0.2604	0.1065	0.0746	0.0083	0.011	0.0134
	3.626	2.908	0.8842	3.702	2.579	1.28	3.716	2.466	1.23	0.3185	0.1223	0.0781	0.0065	0.0103	0.0073

## Sheet: ALP
Protein
	A0			A0.1			A0.5			A5			A10
P5	P10	P15	P5	P10	P15	P5	P10	P15	P5	P10	P15	P5	P10	P15
102.12	52.07	88.38	70.72	147.4	120.2	97.97	85.19	151.8	89.22	75.77	86.03	124.2	164.7	66.35
77.43	110.6	88.21	160.2	116.3	89.89	123.2	107	92.25	131.3	81.49	81.99	101.3	110.4	59.62
115.8	91.01	66.01	224.3	128.4	95.61	177.3	113.3	88.55	123.9	73.58	94.44	137.8	86.7	59.45
85.86	119.9	60.29	280.1	113.1	95.11	200.6	168.6	101	148.8	71.23	74.42	75.77	81.99	52.22
ALP in cells
	A0			A0.1			A0.5			A5			A10
P5	P10	P15	P5	P10	P15	P5	P10	P15	P5	P10	P15	P5	P10	P15
0.0901	-0.0039936	0.0295727	0.120514	-0.00308375	0.0293072	0.0394369	0.00666958	0.036681	0.0369363	0.0839862	-0.011888	0.00548968	0.0386377	0.00685072
0.102917	0.0144051	0.0760066	0.033339	0.000977097	0.0240193	0.0387397	-0.00849618	0.0221729	0.0320224	0.0906414	0.0110878	-0.00112178	0.0730814	0.0247781
0.0461537	-0.0120814	0.0998471	0.029891	-0.00177004	0.0273364	0.0224324	-0.00601781	0.00641651	0.0210947	0.134362	0.0192522	0.014019	0.0576701	0.0458751
0.0873515	-0.0179045	0.077278	0.0300217	-0.00100474	0.022701	0.0237923	-0.000674	0.0337534	0.0236742	0.269613	0.076348	-0.0134978	0.115036	0.0892204
ALP inmedia
	A0			A0.1			A0.5			A5			A10
P5	P10	P15	P5	P10	P15	P5	P10	P15	P5	P10	P15	P5	P10	P15
1.0265	1.55715	1.01988	1.53993	0.45817	0.580083	1.01513	0.672148	0.417817	1.17763	1.02148	0.775454	0.849271	0.510684	0.970363
1.09402	0.718678	0.91935	0.563508	0.570089	0.940266	0.732743	0.57099	0.8286	0.669804	1.04559	0.897203	0.891155	0.763103	1.23384
0.857753	0.541434	1.30325	0.373766	0.536636	0.904072	0.466665	0.586393	0.852394	0.675534	1.21385	0.803583	0.627274	1.00488	1.26272
1.25598	0.718696	2.04718	0.296861	0.629822	1.06006	0.402901	0.406246	0.899227	0.568014	1.11928	1.13941	1.08114	1.14949	1.44804

## Sheet: Gene
hCol I																	hCol I
	A0			A0.1			A0.5			A5			A10						P5					P10					P15
P5	P10	P15	P5	P10	P15	P5	P10	P15	P5	P10	P15	P5	P10	P15			A0	A0.1	A0.5	A5	A10	A0	A0.1	A0.5	A5	A10	A0	A0.1	A0.5	A5	A10
1	1.82134	0.806642	1	1.32409	1.93187	1	1.37078	2.27363	1	1.89868	1.95206	1	0.534033	1.6245			1	1.46917	1.08298	1.21419	0.815072	1	1.06807	0.815072	1.26576	0.238986	1	0.972655	0.843816	0.812252	0.45376
1	0.965936	1.77769	1	2.38667	2.2974	1	1.69349	2.28945	1	1.64718	2.72263	1	0.469761	2.31338			1	0.61132	0.760489	0.742262	0.543367	1	1.51047	1.3333	1.26576	0.264255	1	0.790041	0.97942	1.13682	0.707107
1	1.91189	2.95878	1	12.1678	22.0087	1	1.08298	2.57576	1	1.43893	2.34567	1	0.584389	1.97247			1	0.163232	1.35191	1.42405	0.692555	1	1.03886	0.765779	1.07177	0.211686	1	1.21419	1.17691	1.12896	0.461691
hOCN
	A0			A0.1			A0.5			A5			A10				hOCN
P5	P10	P15	P5	P10	P15	P5	P10	P15	P5	P10	P15	P5	P10	P15					P5					P10					P15
1	0.202361	0.423373	1	1.05702	0.982821	1	0.784584	0.590496	1	0.709562	0.568408	1	0.195467	0.675955			A0	A0.1	A0.5	A5	A10	A0	A0.1	A0.5	A5	A10	A0	A0.1	A0.5	A5	A10
1	0.0115177	0.149167	1	1.04247	1.58008	1	0.50874	0.0633725	1	2.03496	0.539614	1	0.432269	1.01396			1	0.560583	0.734584	0.959264	1.36131	1	2.92817	2.8481	3.36359	1.31494	1	1.30134	1.02456	1.28788	2.17347
1	0.898132	1.11342	1	0.342696	0.594604	1	0.385553	0.678302	1	0.671286	0.709562	1	0.147113	0.592546			1	0.292194	0.264255	0.091823	0.257028	1	6.38639	2.81864	3.91768	2.32947	1	3.55537	0.12896	0.381565	2.00694
																	1	3.27161	1.79626	1.19748	3.05252	1	1.24833	0.771105	0.895025	0.5	1	1.74715	1.09429	0.76313	1.6245
hBSP
	A0			A0.1			A0.5			A5			A10				hBSP
P5	P10	P15	P5	P10	P15	P5	P10	P15	P5	P10	P15	P5	P10	P15					P5					P10					P15
1	0.685391	0.190122	1	3.04196	0.49827	1	1.04247	0.485497	1	1.37554	0.333325	1	0.80107	5.48313			A0	A0.1	A0.5	A5	A10	A0	A0.1	A0.5	A5	A10	A0	A0.1	A0.5	A5	A10
1	4.01389	1.49485	1	0.835088	0.747425	1	1.14472	0.372419	1	1.12506	1.83401	1	0.598739	5.71598			1	0.166662	0.550953	0.450625	0.149685	1	0.739694	0.837987	0.904379	0.174948	1	0.436786	1.6358	0.790041	4.31691
1	0.867539	0.158769	1	0.393654	0.471392	1	5.52127	1.12896	1	0.250868	0.664343	1	1.26576	1.03886			1	3.13834	2.6666	1.38992	1	1	0.65293	0.760489	0.389582	0.149167	1	1.56917	0.664343	1.70527	3.82378
																	1	3.47015	0.471392	0.784584	1.26576	1	1.57462	3.00008	0.22688	1.84676	1	10.3031	3.35195	3.28297	8.28212
hDSPP
	A0			A0.1			A0.5			A5			A10				hDSPP
P5	P10	P15	P5	P10	P15	P5	P10	P15	P5	P10	P15	P5	P10	P15					P5					P10					P15
1	3.70635	4.43828	1	3.04196	11.7942	1	1.02456	1.32869	1	1.68763	1.64148	1	0.388234	2.80889			A0	A0.1	A0.5	A5	A10	A0	A0.1	A0.5	A5	A10	A0	A0.1	A0.5	A5	A10
1	0.294227	0.317538	1	0.832199	0.578344	1	1.1607	0.832199	1	2.51403	2.06337	1	0.709562	3.63008			1	1.6358	1.38511	1.95884	2.94854	1	1.34257	0.382889	0.891929	0.308855	1	4.34694	0.41466	0.724471	1.86607
1	1.20164	3.55537	1	2.02792	1.64718	1	1.87905	8.57419	1	0.803851	0.413225	1	0.164368	0.184284			1	0.162105	0.132127	0.0382075	0.0638133	1	0.458502	0.521233	0.326465	0.153893	1	0.295248	0.346277	0.248273	0.72951
																	1	0.76313	0.421908	1.47939	11.432	1	1.28788	0.659754	0.989657	1.56374	1	0.353553	1.01748	0.171943	0.592546
hDMP1
	A0			A0.1			A0.5			A5			A10				hDMP1
P5	P10	P15	P5	P10	P15	P5	P10	P15	P5	P10	P15	P5	P10	P15					P5					P10					P15
1	0.592546	0.0960547	1	2.48802	0.724471	1	6.38639	5.59834	1	0.949342	0.393654	1	0.646176	2.37841			A0	A0.1	A0.5	A5	A10	A0	A0.1	A0.5	A5	A10	A0	A0.1	A0.5	A5	A10
1	1.07177	0.192109	1	1.37554	0.917004	1	0.474671	2.20381	1	1.78386	1.89212	1	0.576343	1.16878			1	0.146097	0.0622838	0.566442	0.349896	1	0.613442	0.671286	0.907519	0.381565	1	1.10191	3.63008	2.32141	8.6638
1	0.586417	2.19619	1	0.846745	1.20164	1	0.439825	1.32409	1	0.160985	0.82932	1	0.461691	0.641713			1	0.702222	0.582367	0.314253	0.436786	1	0.90125	0.257921	0.523042	0.234881	1	3.35195	6.6807	3.09513	2.65737
																	1	1.16473	1.95884	1.89212	2.2974	1	1.68179	1.46917	0.51943	1.80876	1	0.63728	1.18099	0.714497	0.671286

## Sheet: Morphology
Cell area																Cell perimeter																AR																Circularity
	A0			A0.1			A0.5			A5			A10				A0			A0.1			A0.5			A5			A10				A0			A0.1			A0.5			A5			A10				A0
P5	P10	P15	P5	P10	P15	P5	P10	P15	P5	P10	P15	P5	P10	P15		P5	P10	P15	P5	P10	P15	P5	P10	P15	P5	P10	P15	P5	P10	P15		P5	P10	P15	P5	P10	P15	P5	P10	P15	P5	P10	P15	P5	P10	P15		P5	P10
952.293	4931.58	4984.28	2041.42	324.519	4185.47	2617.42	11138.1	6303.62	2775.52	5669.38	9218.75	5185.84	2323.41	4222.45		279.28	1055.74	708.396	376.817	175.297	794.781	602.677	1038.01	809.273	392.281	1343.27	927.401	1122.92	565.792	654.913		3.40981	4.67121	7.03601	5.41754	1.85125	5.26619	4.34299	10.7302	7.78924	7.07533	4.22059	9.94041	4.61818	4.10647	6.44734		0.153	0.056
663.831	2247.6	8754.62	1281.43	2193.05	4106.88	1188.06	332.84	7897.56	1434.91	806.213	2716.35	1784.39	4399.96	5257.03		184.582	471.128	892.962	233.069	388.185	896.665	266.228	114.048	789.439	456.29	121.974	625.367	392.941	705.54	554.857		3.5964	4.77067	9.80403	5.49809	5.64949	4.58017	4.46255	2.91842	10.004	3.14473	6.60971	4.3436	4.54112	6.23631	9.47456		0.245	0.127
3161.98	301.405	3474.48	1362.8	2218.01	3823.96	2336.35	1807.51	3425.48	3935.84	2156.07	4495.19	1727.07	10769.2	2119.08		437.912	125.063	712.322	282.369	538.692	575.424	486.842	406.363	583.526	1000.49	532.4	651.05	258.769	524.86	286.295		7.22059	2.41003	4.87768	4.82629	4.1174	6.64547	4.799	4.44801	5.87031	3.93389	4.04971	6.90453	6.67418	20.5183	7.40175		0.207	0.242
3647.37	3565.09	5504.81	1715.05	2372.41	11077.1	1163.09	9500.74	3778.66	7448.23	8750	11807.5	3807.32	336.538	2900.33		663.112	454.833	1002.82	268.384	445.138	957.896	229.553	1062.31	668.938	1765.17	1156.43	801.404	825.744	89.475	364.465		5.50039	7.83824	5.48933	6.39029	5.32961	11.564	5.06677	8.94345	5.64875	4.21956	7.56639	14.7335	4.61078	3.76125	7.95778		0.104	0.217
3154.59	2527.74	1954.51	1463.57	2944.71	3704.7	1223.19	3897	4128.14	3619.64	6655.88	1999.82	8186.94	2825.44	2509.25		600.52	466.662	641.918	305.196	459.902	774.207	256.049	593.801	833.186	774.127	1114.37	554.423	1480.87	552	740.155		5.25309	5.41663	3.0448	4.79552	6.40291	4.78515	4.77716	6.56281	4.95465	4.67577	5.9728	3.60702	5.52845	5.11856	3.39016		0.11	0.146
776.627	1493.16	1523.67	7179.18	1500.56	10119.3	1433.99	750.74	2638.68	1607.8	2068.23	2138.5	3730.58	1046.6	2304.92		185.379	309.799	432.979	1153.59	415.865	1000.97	304.263	140.875	523.324	410.072	526.84	884.499	436.882	447.857	753.32		4.1894	4.81976	3.51904	6.22333	3.60827	10.1095	4.71299	5.32912	5.04216	3.92078	3.92573	2.41775	8.53911	2.3369	3.05968		0.284	0.196
3512.39	3696.38	1859.28	2585.98	3431.03	3267.38	1925.85	2268.86	1481.14	3403.29	1021.63	5088.76	1315.64	12238.4	2957.66		721.021	553.28	368.078	559.726	331.323	572.607	395.058	328.04	369.688	819.798	270.051	660.642	296.941	1592.75	453.2		4.87141	6.68084	5.05133	4.62009	10.3555	5.70615	4.87486	6.91642	4.00646	4.15138	3.78312	7.70275	4.43065	7.68379	6.52616		0.085	0.152
1516.27	1488.54	995.747	2209.69	3063.05	2598	1273.11	7359.47	1378.51	3540.13	2769.05	2777.37	2477.81	2095.97	9859.47		431.966	238.878	357.683	461.826	320.621	583.913	206.436	1217.27	309.936	602.677	827.154	514.215	401.8	406.58	883.573		3.51017	6.23136	2.78388	4.78468	9.55351	4.4493	6.16711	6.04588	4.44773	5.874	3.34768	5.40118	6.16678	5.15512	11.1586		0.102	0.328
106.324	3531.8	3448.59	5012.02	3899.78	3733.36	6004.99	1911.06	913.462	1645.71	4050.48	3872.04	5255.18	3178.62	4264.05		55.479	709.853	652.724	923.724	981.013	512.622	873.298	480.51	228.25	394.478	729.817	550.754	1058.97	398.381	550.97		1.91647	4.9754	5.28339	5.42588	3.97526	7.28287	6.87622	3.97715	4.00202	4.17187	5.55	7.03044	4.96256	7.97885	7.73917		0.434	0.088
4976.89	2339.13	8259.06	2844.86	2951.18	6156.62	1046.6	2313.24	2147.74	1321.19	4047.71	3623.34	2759.8	7283.65	14223.4		898.491	447.254	788.836	472.511	448.284	451.701	216.285	360.648	509.339	273.767	637.179	477.443	450.15	1067.44	1597.23		5.53916	5.22997	10.4699	6.02073	6.58329	13.6299	4.83898	6.41412	4.21673	4.82597	6.35254	7.58904	6.13085	6.82348	8.90501		0.077	0.147
2163.46	2910.5	1807.51	942.123	475.222	2609.1	1090.98	1880.55	2309.54	1740.02	2728.36	1104.85	2650.7	3819.34	1954.51		330.896	671.601	452.83	254.883	306.709	369.266	244.238	342.298	512.332	346.458	654.475	272.481	639.392	432.786	429.753		6.53819	4.33368	3.99158	3.6963	1.54942	7.06563	4.46686	5.49389	4.5079	5.0223	4.16878	4.05476	4.14566	8.82501	4.54799		0.248	0.081
3406.07	2891.09	11704	3552.14	1136.28	3291.42	816.383	13380.2	760.91	712.833	5998.52	2663.65	1017.94	338.388	4289.94		623.677	588.675	1145.16	589.585	260.829	416.153	133.842	1522.85	128.87	173.607	466.898	563.965	164.418	200.803	377.227		5.46126	4.91118	10.2204	6.02482	4.35642	7.90916	6.0996	8.7863	5.90448	4.10602	12.8476	4.72307	6.19115	1.68517	11.3723		0.11	0.105
225.592	6485.76	306.953	146.08	344.859	321.746	828.402	2361.32	2686.76	1612.43	1538.46	1284.21	232.064	1546.78	10705.4		129.529	1162.06	120.051	53.226	326.873	135.805	239.595	488.379	543.995	346.747	367.683	247.464	116.905	596.674	1073.7		1.74163	5.58125	2.55686	2.74452	1.05502	2.36918	3.45751	4.83501	4.93894	4.65015	4.18421	5.18948	1.98506	2.59234	9.97062		0.169	0.06
3918.27	1650.33	3281.25	5691.57	3042.71	4174.37	2419.56	6411.8	2255.92	2036.8	2974.3	3541.97	3408.84	5539.02	8155.51		571.151	342.105	479.97	929.767	589.415	1198.25	367.435	963.529	439.778	327.83	410.458	538.362	503.103	840.139	736.486		6.8603	4.82405	6.83636	6.1215	5.16226	3.48373	6.58501	6.65449	5.12967	6.21297	7.24629	6.57917	6.77563	6.59298	11.0735		0.151	0.177
2399.22	2150.52	1238.9	4212.28	3739.83	12078.4	3805.47	9921.41	9086.54	1648.48	3314.53	3315.46	1611.5	12954	3844.3		354.303	398.477	247.134	527.853	506.33	1343.57	718.188	1506.11	1082.02	399.234	821.108	486.069	318.014	1388.04	545.491		6.77167	5.39684	5.01309	7.98002	7.38615	8.98977	5.29871	6.58742	8.39775	4.12912	4.03666	6.82096	5.06739	9.33258	7.04742		0.24	0.17
204.327	3967.27	2914.2	2222.63	6880.55	2121.86	673.077	2026.63	12361.3	647.189	12435.3	2204.14	5710.98	5962.46	10121.1		189.088	549.321	711.366	388.918	962.329	512.316	277.767	404.013	1386.14	243.634	1608.33	749.778	480.356	965.975	1142.78		1.08059	7.22214	4.09663	5.71491	7.14989	4.1417	2.42317	5.01624	8.91782	2.6564	7.73181	2.93973	11.8891	6.17248	8.85661		0.072	0.165
255.178	2720.97	3526.26	142.382	4498.89	4020.89	1487.61	2392.75	500.185	1332.29	2056.21	4007.95	4297.34	485.392	2240.2		102.373	574.241	499.474	102.333	540.808	741.202	328.973	485.386	275.224	309.259	340.858	382.859	1169.85	98.39	375.594		2.49263	4.73837	7.05994	1.39136	8.31883	5.42483	4.52199	4.92958	1.81737	4.30799	6.03246	10.4685	3.67342	4.93335	5.96442		0.306	0.104
164.571	1819.53	4443.42	2070.08	3636.28	7922.52	1457.1	5955.07	3040.86	800.666	495.562	6336.91	1475.59	2329.88	2592.46		79.859	369.358	1242.58	525.617	627.097	732.213	303.426	745.071	562.702	256.436	146.974	879.34	295.444	549.241	650.367		2.06077	4.92619	3.57595	3.93838	5.79859	10.82	4.80216	7.99262	5.40404	3.12228	3.37177	7.20644	4.99449	4.242	3.98614		0.324	0.168
521.45	2302.14	8093.56	1873.15	1751.11	1618.9	1266.64	3213.76	1808.43	1165.87	3090.79	1674.37	4942.68	3180.47	5975.41		170.614	322.174	937.153	338.669	343.095	275.184	256.573	633.333	402.83	259.992	761.479	598.227	716.862	960.439	721.255		3.05631	7.14566	8.63633	5.53092	5.10386	5.88297	4.93677	5.07436	4.48932	4.48423	4.05893	2.79889	6.89488	3.31148	8.28474		0.225	0.279
1335.06	2738.54	2518.49	1859.28	355.954	9773.48	886.649	2473.19	1910.13	2339.13	2396.45	2364.09	3461.54	4291.79	3714.87		350.537	337.182	436.166	468.834	88.348	1158.88	288.895	421.868	436.922	638.805	1066.51	526.84	659.556	675.471	1098.51		3.80861	8.12183	5.77416	3.96576	4.029	8.43358	3.0691	5.86247	4.37179	3.66172	2.24701	4.4873	5.24829	6.35377	3.38172		0.137	0.303
120.192	2580.44	7848.56	899.593	1059.54	1528.29	1324.89	3303.44	5785.87	1964.68	1433.99	4296.41	1771.45	1760.36	4181.77		55.713	333.028	1338.8	227.63	237.945	347.834	276.407	590.325	777.691	356.419	363.475	704.687	405.88	259.332	352.05		2.15734	7.74841	5.86237	3.952	4.45288	4.39374	4.79325	5.59597	7.43981	5.51228	3.94521	6.09691	4.36447	6.78804	11.8783		0.487	0.292
21773.3	3331.18	2106.14	1695.64	3227.63	3750	2214.31	1054.92	5442.86	3541.05	2389.98	5595.41	1552.33	7014.61	2923.45		2662.73	312.432	534.066	300.57	304.166	377.887	418.448	289.402	756.087	709.329	422.681	864.149	199.694	1726.66	562.429		8.17706	10.6621	3.94359	5.6414	10.6114	9.9236	5.29173	3.64517	7.19872	4.99211	5.65433	6.47506	7.77354	4.06252	5.1979		0.039	0.429
1686.39	7350.22	5318.97	3470.78	8132.4	3258.14	1421.04	1119.64	1715.98	1976.7	5360.58	1693.79	3636.28	5987.43	11666		264.908	561.225	1027.46	535.546	651.236	335.205	313.548	264.772	392.475	616.998	773.508	537.565	988.432	707.463	701.887		6.36595	13.0967	5.17683	6.48083	12.4876	9.71983	4.53214	4.22869	4.37219	3.20374	6.93022	3.15085	3.67884	8.46324	16.621		0.302	0.293
4466.53	2202.29	1695.64	1218.57	4195.64	2352.07	1490.38	3101.89	2965.98	1382.21	397.559	1129.81	488.166	1067.86	1786.24		965.982	351.421	489.022	317.628	509.669	254.9	360.016	601.437	453.103	411.319	136.465	253.29	225.763	275.787	750.857		4.62382	6.26682	3.4674	3.83645	8.23208	9.22743	4.13977	5.15746	6.54592	3.36044	2.91327	4.46053	2.16229	3.87205	2.37894		0.06	0.224
1137.2	1982.25	1938.79	2315.09	2399.22	1864.83	1305.47	1852.81	1603.18	735.022	1704.88	6278.66	8232.25	3990.39	11918.5		353.426	263.023	638.072	487.445	300.171	295.857	248.414	393.505	330.703	333.979	464.555	770.538	937.756	578.127	1142.79		3.21766	7.53641	3.03852	4.74944	7.99285	6.30315	5.25523	4.70848	4.84779	2.2008	3.66992	8.14841	8.77867	6.90226	10.4292		0.114	0.36
113.72	11013.3	3114.83	194.157	3654.77	12946.6	4646.82	318.047	4309.36	715.607	1103.92	3680.66	2619.27	1852.81	5666.6		67.154	608.443	580.766	89.242	413.885	534.258	715.992	100.917	482.843	221.491	279.826	921.285	557.376	224.347	780.347		1.69342	18.1008	5.36331	2.17562	8.8304	24.2328	6.49004	3.15157	8.92497	3.23086	3.94502	3.99514	4.69928	8.25868	7.26165		0.317	0.374
163.646	2943.79	4147.56	801.59	4200.26	4067.12	2041.42	713.757	6006.84	708.21	2696.93	2169.93	2566.57	6347.08	3152.74		85.259	318.694	599.514	229.746	362.872	559.982	519.461	185.049	544.653	167.178	539.602	391.098	388.492	525.56	838.715		1.9194	9.23703	6.9182	3.48903	11.575	7.26295	3.92988	3.85712	11.0288	4.23626	4.998	5.54831	6.60649	12.0768	3.75901		0.283	0.364
3417.16	2181.95	3414.39	1520.89	2042.35	4054.18	839.497	2994.64	2434.36	2521.26	2316.94	2836.54	884.8	1718.75	9305.66		568.625	231.666	466.742	535.449	415.831	865.855	194.761	325.69	422.874	514.312	376.39	504.053	152.18	360.925	751.267		6.00951	9.41853	7.31536	2.84041	4.91148	4.68228	4.3104	9.19475	5.7567	4.90221	6.15568	5.62746	5.81417	4.76207	12.3866		0.133	0.511
2277.18	7167.16	3437.5	7296.6	4981.51	10606.5	1833.39	6186.21	5560.28	1043.82	1161.24	3463.39	923.632	5726.7	10129.4		623.034	531.08	482.689	1359.83	711.912	1153.61	390.182	957.816	578.145	306.106	533.326	496.811	170.227	478.525	1112.34		3.65499	13.4954	7.12156	5.3658	6.99737	9.19416	4.69882	6.45866	9.61745	3.41001	2.17736	6.97124	5.42588	11.9674	9.10646		0.074	0.319
141.457	2879.07	10016.6	1393.31	5175.67	5959.69	2071.01	5643.49	10539	1178.81	3735.21	4186.39	1399.78	3313.61	6623.52		67.154	408.326	947.911	312.149	495.491	824.504	400.4	528.377	793.22	292.435	1070.59	503.24	288.412	530.931	637.589		2.10646	7.05091	10.5671	4.46359	10.4455	7.22821	5.17234	10.6808	13.2864	4.03101	3.48893	8.31888	4.8534	6.24113	10.3884		0.394	0.217
3990.39	8492.97	407.729	836.723	2549	5179.36	4350.04	9308.43	1899.96	4742.97	1665.13	2506.47	3122.23	3259.99	1313.79		880.83	498.931	262.519	184.019	418.061	840.019	845.385	780.307	305.236	858.67	520.798	458.906	506.853	432.462	399.564		4.53026	17.0223	1.55314	4.54694	6.0972	6.16577	5.14563	11.9292	6.22457	5.52363	3.19726	5.46184	6.16002	7.5382	3.28807		0.065	0.429
408.654	4700.44	3418.08	1353.55	3657.54	5359.65	1203.77	2066.38	1195.45	2562.87	2294.75	7073.78	3160.13	7482.43	2801.41		148.47	802.394	525.424	247.987	638.466	890.259	363.395	435.676	271.941	629.39	395.218	1176.14	479.753	1014.24	512.702		2.75243	5.85802	6.50538	5.45815	5.72864	6.02033	3.31257	4.74294	4.39599	4.07199	5.80629	6.01442	6.587	7.37741	5.464		0.233	0.092
3174.93	2122.78	2592.46	13128.7	2577.66	2315.09	3314.53	3951.55	1997.04	942.123	578.772	6489.46	3223.93	2925.3	23831.4		424.78	341.598	420.468	2066.78	522.124	524.491	401.704	697.284	371.184	235.299	187.842	748.451	476.663	958.09	1229.08		7.47428	6.21427	6.16564	6.35224	4.93688	4.41397	8.25118	5.66706	5.38019	4.00394	3.08116	8.67052	6.76354	3.05326	19.3896		0.221	0.229
2713.57	1299.93	3408.84	10444.7	1619.82	1532.91	894.97	3960.8	10163.6	1556.03	1802.88	3014.98	4867.79	4787.35	20617.6		329.69	280.196	568.141	1491.62	258.866	268.714	213.468	611.752	1086.81	311.569	318.038	577.483	920.208	711.639	1665.65		8.23068	4.63935	5.99999	7.00228	6.25738	5.70463	4.19253	6.47452	9.35179	4.99417	5.66877	5.22089	5.28988	6.72722	12.3781		0.314	0.208
1519.97	3934.91	5190.46	1582.84	3848.93	988.351	1671.6	4121.67	5563.06	841.346	4973.19	2353	410.503	1446.01	17943.8		245.597	580.26	729.743	311.102	440.728	182.796	429.327	491.66	863.569	213.645	875.044	882.013	219.141	348.534	1236.92		6.18888	6.78129	7.11272	5.08785	8.73311	5.40685	3.89353	8.38318	6.44193	3.93806	5.68336	2.66776	1.87324	4.14882	14.5068		0.317	0.147
117.419	2656.25	5122.04	4537.72	1260.17	2889.24	758.136	7419.56	857.064	4466.53	1108.54	1476.52	8174.93	8504.99	786.797		73.02	571.054	806.216	672.244	328.33	484.902	140.448	738.954	219.334	504.85	399.82	185.749	1269.42	1181.86	238.702		1.60804	4.65149	6.35319	6.75011	3.83812	5.9584	5.39798	10.0406	3.90757	8.84724	2.77261	7.94898	6.43987	7.1963	3.29615		0.277	0.102
208.95	1687.32	4219.68	5839.5	1259.25	5083.21	5160.87	2264.24	6154.77	3883.14	4076.37	6708.58	2536.98	3729.66	3472.63		95.711	311.432	587.759	987.146	286.722	1012.83	853.56	277.062	753.127	1073.47	358.555	739.109	758.509	748.837	882.543		2.18313	5.41792	7.17926	5.91554	4.39187	5.01882	6.04629	8.17232	8.17229	3.61735	11.3689	9.07658	3.3447	4.9806	3.9348		0.287	0.219
412.352	1742.79	5564.9	1225.04	2132.03	4123.52	828.402	1847.26	2892.94	2343.75	2878.14	3641.83	7932.69	1092.83	5724.85		103.5	379.19	537.525	334.976	467.128	543.418	206.243	441.815	595.105	375.224	314.578	701.227	1106.66	365.278	808.596		3.98408	4.59608	10.3528	3.65709	4.56412	7.58812	4.01663	4.18108	4.86122	6.24627	9.14922	5.19351	7.16816	2.99176	7.07999		0.484	0.152
102.626	2957.66	4640.35	1291.61	1248.15	3730.58	2983.54	2790.31	3394.97	5070.27	989.275	829.327	2052.51	4919.56	7173.63		52.663	487.662	609.033	350.184	310.442	505.653	412.172	557.44	407.416	1012.74	280	191.945	616.998	953.544	560.546		1.94873	6.06497	7.61921	3.68836	4.02056	7.37776	7.23859	5.00558	8.33293	5.00649	3.53313	4.32065	3.32662	5.15924	12.7976		0.465	0.156
126.664	5277.37	3174	1846.34	2709.87	12190.3	2307.69	3354.29	2121.86	1593.93	3385.72	2736.69	1598.56	1008.69	12409.4		75.643	708.493	512.292	459.106	418.215	491.616	576.107	691.105	501.293	336.529	411.277	454.56	390.085	225.007	937.893		1.6745	7.44872	6.19569	4.0216	6.47962	24.7963	4.00567	4.85352	4.23277	4.7364	8.23223	6.02052	4.09797	4.48293	13.2311		0.278	0.132
2007.21	2843.01	8847.08	2830.07	1634.62	4827.11	952.293	3213.76	3823.96	1682.69	493.713	2203.22	240.385	7802.33	7274.41		311.762	482.666	837.676	705.557	320.871	450.346	234.116	555.75	639.352	752.684	126.673	634.613	86.988	542.128	935.97		6.43828	5.89022	10.5615	4.01111	5.09431	10.7187	4.06761	5.78274	5.981	2.23559	3.89754	3.47175	2.76343	14.392	7.77205		0.26	0.153
116.494	1529.22	1770.53	2848.56	9801.22	3634.43	1041.05	3061.21	969.859	3027.92	323.595	1855.58	6318.42	1258.32	4565.46		54.586	341.871	521.168	679.8	851.757	561.422	323.784	575.27	196.354	631.836	73.72	454.52	568.801	539.609	491.742		2.13414	4.47308	3.39723	4.19029	11.5071	6.47362	3.21526	5.32134	4.93934	4.79226	4.38951	4.08251	11.1083	2.33191	9.28426		0.491	0.164
2564.72	2365.01	4771.64	1939.72	5270.9	8782.36	813.609	1755.73	8945.08	803.439	8460.61	5446.56	4166.05	4829.88	4734.65		343.601	438.612	763.426	418.488	665.126	1329.84	154.803	372.391	682.053	228.096	697.534	866.715	938.296	567.208	828.19		7.46424	5.39204	6.25029	4.63506	7.92466	6.60409	5.25577	4.71475	13.1149	3.52237	12.1293	6.28414	4.44002	8.51519	5.71687		0.273	0.154
2744.08	3541.97	2873.52	1973.93	5089.68	4978.73	1040.13	3655.7	4254.81	2276.26	911.612	5906.99	4000.55	13298.8	3370.01		464.368	646.601	499.434	285.596	854.783	596.874	233.126	514.682	515.325	343.505	232.892	502.073	372.721	1494.84	635.199		5.90929	5.47784	5.75356	6.91161	5.95436	8.34135	4.46165	7.10282	8.25655	6.62656	3.91431	11.7652	10.7334	8.89647	5.30543		0.16	0.106
1971.15	3727.81	2666.42	494.638	2145.89	3859.1	7557.32	348.558	3400.52	1007.77	1830.62	11308.2	1480.21	1517.2	17688.6		682.303	490.245	452.21	146.177	345.194	782.729	951.837	97.497	756.666	167.178	600.987	1000.52	478.553	254.593	1416.17		2.88897	7.60398	5.89642	3.38383	6.21649	4.93031	7.93972	3.57506	4.49408	6.0281	3.04602	11.3024	3.0931	5.9593	12.4904		0.053	0.195
890.348	1719.67	1244.45	2448.22	3811.95	5050.85	665.68	1298.08	6668.82	3321.93	784.948	4289.02	2178.25	3226.7	7113.54		222.287	276.817	379.4	575.52	602.877	1041.1	173.977	417.821	632.44	585.602	278.796	542.442	499.201	457.553	1117.2		4.0054	6.21232	3.28006	4.25394	6.32292	4.85145	3.82625	3.10678	10.5446	5.67268	2.81549	7.90687	4.36348	7.05208	6.36726		0.226	0.282
112.796	1292.53	876.479	3580.81	1710.43	4277.92	1398.85	3045.49	1942.49	9344.49	1216.72	945.821	3374.63	521.45	3682.51		73.72	327.613	285.982	493.135	341.211	981.343	342.395	816.692	478.2	1081.04	221.724	223.454	597.414	315.761	535.169		1.53006	3.9453	3.0648	7.26131	5.01282	4.35925	4.0855	3.72905	4.06209	8.64401	5.48753	4.23273	5.64873	1.65141	6.88102		0.261	0.151
3670.49	2442.68	2094.12	8664.02	1788.09	4616.31	2941.94	1174.19	4059.73	2424.19	1190.83	2318.79	2734.84	6451.55	6687.31		550.89	353.704	343.658	986.316	343.384	620.788	476.977	355.703	443.351	751.677	448.59	760.609	698.274	696.738	492.678		6.66283	6.90599	6.09362	8.78422	5.20727	7.43621	6.16788	3.30103	9.15691	3.22504	2.6546	3.04859	3.91657	9.25965	13.5734		0.152	0.245
350.407	2846.71	3242.42	6999.81	3042.71	6076.18	2380.73	1274.04	1813.98	3838.76	2022.93	7156.06	12181	2578.59	10172		129.2	474.479	440.495	1371.77	529.503	770.345	410.562	208.729	344.688	705.42	265.761	685.786	1272.85	449.45	590.422		2.71213	5.99965	7.36085	5.10278	5.74636	7.88761	5.79871	6.10379	5.26267	5.4418	7.61184	10.4348	9.56987	5.73721	17.2283		0.264	0.159
1139.05	2960.43	1422.89	561.206	1527.37	4973.19	3592.82	2154.22	1934.17	1316.57	1038.28	2365.94	1642.01	4830.81	4131.84		223.317	400.156	271.064	179.2	213.468	621.488	778.52	362.075	360.965	311.335	380.453	624.764	354.126	661.269	542.715		5.10061	7.39819	5.24928	3.13173	7.15502	8.00207	4.61494	5.94964	5.35834	4.22878	2.72905	3.78693	4.6368	7.30536	7.61328		0.287	0.232
735.022	3193.42	4412.91	2546.23	7365.02	4660.69	1400.7	10307	2119.08	1376.66	1455.25	2737.61	2523.11	19008	3788.83		256.516	310.854	915.492	428.313	1286.73	589.939	332.763	964.212	392.281	384.919	450.628	339.032	344.124	1658.35	508.139		2.8654	10.273	4.82026	5.94478	5.72381	7.90029	4.20931	10.6895	5.40195	3.5765	3.22938	8.07479	7.33199	11.462	7.45629		0.14	0.415
122.966	2885.54	1642.01	1666.05	7961.35	1784.39	3064.9	2213.39	2237.43	680.473	1532.91	5093.38	2390.9	7944.71	5378.14		74.05	370.832	238.935	371.458	1229.1	323.864	584.106	355.703	306.033	259.839	507.151	585.199	421.417	982.39	671.624		1.66058	7.78126	6.87221	4.48516	6.4774	5.5097	5.24717	6.22257	7.31106	2.61883	3.0226	8.70367	5.67348	8.08713	8.00767		0.282	0.264
14743.9	1872.23	2707.1	1886.1	2524.96	5663.83	1907.36	1076.18	3956.18	5751.66	3637.2	2535.13	1091.9	1859.28	7503.7		1746.7	251.703	641.532	367.981	350.36	731.36	481.29	259.389	624.924	1073.78	435.579	505.283	380.896	328.137	870.151		8.44101	7.43823	4.21974	5.12552	7.20677	7.74424	3.96301	4.14892	6.33065	5.35647	8.35027	5.01725	2.86666	5.66618	8.62344		0.061	0.371
806.213	3407.91	6613.35	2119.08	1627.22	3480.03	6541.23	2660.87	2864.28	3517.94	1338.76	4563.61	352.256	2323.41	4425.85		244.004	624.029	731.666	397.874	317.025	343.368	1135.58	356.323	372.914	528.553	464.123	754.937	127.083	444.864	583.333		3.3041	5.46115	9.03876	5.32602	5.13278	10.135	5.76024	7.46759	7.68079	6.65579	2.88449	6.04502	2.77186	5.22274	7.58718		0.17	0.11
142.382	1334.13	17167.2	1262.02	2803.25	3958.95	923.632	1351.7	2218.01	1153.85	10926.4	1823.22	3857.25	10539	10228.4		113.308	308.712	1508.95	355.253	414.425	760.166	253.25	339.812	353.45	284.059	692.838	428.313	483.309	1390.37	1104.06		1.25659	4.32162	11.3769	3.55245	6.7642	5.20801	3.64712	3.97779	6.27531	4.06199	15.7705	4.25676	7.98092	7.58001	9.26435		0.139	0.176
163.646	6813.98	4437.87	571.376	1705.81	2079.33	4098.56	1678.99	4797.52	4976.89	1151.07	3243.34	1600.41	1494.08	7930.84		86.385	727.547	591.202	117.331	269.414	407.763	691.532	328.192	795.771	1047.47	406.343	906.956	308.069	246.064	859.659		1.89438	9.36569	7.50652	4.86978	6.33154	5.09935	5.92678	5.11589	6.02877	4.75135	2.83276	3.57608	5.19496	6.07193	9.22557		0.276	0.162
121.117	2475.96	2820.82	810.836	1439.53	4196.56	3379.25	1119.64	6224.11	2864.28	7201.37	13640.9	2786.61	4839.13	3462.46		78.693	449.74	402.227	241.188	346.377	726.501	606.643	298.896	792.392	567.015	1089.83	1803.24	766.105	832.036	414.738		1.53911	5.50532	7.01301	3.36184	4.15597	5.7764	5.57041	3.74591	7.85484	5.0515	6.60778	7.56466	3.63738	5.81601	8.34855		0.246	0.154
4574.7	1719.67	4042.16	7744.08	1075.26	722.078	1840.79	1775.15	7021.08	2342.82	4966.72	6863.9	2264.24	4832.65	3434.73		593.921	347.874	805.387	1134.32	295.211	276.97	450.594	423.574	729.043	581.33	747.244	1101.87	337.229	1438.91	786.776		7.70255	4.94338	5.0189	6.82707	3.64234	2.60706	4.08525	4.19088	9.63054	4.03011	6.64671	6.22932	6.71424	3.35856	4.36557		0.163	0.179
214.497	2449.15	6603.18	787.722	2723.74	1887.02	958.765	2861.5	3890.53	2168.08	2446.38	1003.14	791.42	970.784	4692.12		131.356	479.093	768.422	244.744	427.307	316.075	136.795	621.891	806.167	538.129	511.166	193.868	143.224	304.383	837.242		1.63294	5.11205	8.59317	3.21855	6.37421	5.97016	7.00877	4.60129	4.82596	4.02893	4.78587	5.17436	5.52575	3.18935	5.60426		0.156	0.134
952.293	2802.33	814.534	244.083	3868.34	1845.41	880.178	3933.06	2750.55	3605.77	1244.45	8282.17	2371.49	6068.79	3894.23		246.354	482.086	211.545	96.934	907.793	388.629	232.039	877.007	621.818	680.846	358.076	1586.01	435.932	874.408	768.398		3.86555	5.81293	3.85041	2.51803	4.26126	4.74852	3.79323	4.48464	4.42341	5.29601	3.47539	5.22202	5.44004	6.94045	5.06799		0.197	0.152
1845.41	882.951	2545.3	8903.48	2169.01	1158.47	1152	2122.78	4668.08	3261.83	3987.61	4866.86	3823.96	1151.07	5564.9		287.752	435.925	394.011	958.58	415.688	270.211	279.223	447.857	533.253	893.825	621.021	523.694	432.996	348.301	590.735		6.41321	2.02547	6.45998	9.28819	5.21788	4.28728	4.12572	4.73986	8.75398	3.6493	6.42106	9.29334	8.83141	3.30482	9.42031		0.28	0.058
147.004	3858.17	2320.64	209.874	1849.11	2584.14	927.33	2792.16	5250.56	961.538	2830.99	3696.38	3009.43	2036.8	3529.03		113.252	620.241	370.718	59.462	370.484	278.74	158.319	500.504	832.816	333.262	548.524	833.886	446.128	437.405	336.102		1.29803	6.22044	6.25984	3.52955	4.99107	9.27077	5.85735	5.5787	6.30458	2.88523	5.16111	4.43271	6.74566	4.65655	10.4999		0.144	0.126
1587.46	6900.89	2270.71	3395.89	2353	2630.36	1299	1479.29	2435.28	870.007	2081.18	3700.07	1543.08	4662.54	6607.8		413.685	1145.2	361.625	426.937	336.432	541.082	319.824	367.515	364.232	311.762	381.266	538.789	353.836	513.305	741.732		3.83737	6.0259	6.27918	7.95409	6.99397	4.8613	4.06161	4.02511	6.68607	2.79061	5.45859	6.86739	4.36101	9.08337	8.90861		0.117	0.066
1038.28	2547.15	4577.48	3463.39	807.138	3165.68	2453.77	1936.02	4384.25	877.404	4210.43	4982.43	2535.13	4379.62	2436.21		246.007	385.442	905.347	816.902	167.508	507.376	544.518	437.832	513.402	335.965	676.42	567.715	535.119	751.364	369.301		4.22052	6.60839	5.05605	4.23966	4.8185	6.23932	4.50632	4.42184	8.5396	2.61159	6.22458	8.77629	4.73751	5.8289	6.5968		0.216	0.215
147.929	10603.7	1292.53	8568.79	6114.09	4671.78	3734.28	2480.58	1977.63	5271.82	1865.75	2530.51	2529.59	1761.28	5113.72		48.817	1318.68	306.596	1416.77	957.84	600.834	447.567	388.242	485.676	902.401	337.985	459.606	490.808	496.321	613.072		3.03028	8.0412	4.21574	6.04812	6.38321	7.7755	8.34352	6.38927	4.0719	5.84199	5.52023	5.50582	5.15392	3.54867	8.34114		0.78	0.077
2406.62	4211.35	2941.94	224.667	1530.14	5328.22	929.179	1271.27	2107.06	1353.55	2992.79	2039.57	2439.9	3228.55	4396.27		487.815	768.695	431.66	88.445	345.758	706.353	234.719	533.429	480.373	382.603	828.304	368.698	455.783	575.174	412.252		4.93347	5.47858	6.81541	2.54019	4.42547	7.54328	3.95869	2.38319	4.38631	3.53774	3.61315	5.53182	5.35321	5.61317	10.664		0.127	0.09
845.969	6274.96	11125.2	10173.8	2014.61	2054.36	3206.36	2191.2	13873	1208.39	3115.75	888.499	3058.43	2449.15	1654.96		158.456	1092.9	733.96	2041.9	472.607	459.669	588.249	495.974	1473.02	283.496	442.635	382.579	795.788	387.349	287.285		5.33883	5.74154	15.1578	4.98253	4.26276	4.46922	5.45069	4.41797	9.41804	4.26248	7.0391	2.32239	3.84327	6.32285	5.76068		0.423	0.066
1060.47	1571.75	2257.77	952.293	4547.89	3237.8	1620.75	2015.53	7745.01	2939.16	2400.15	2742.23	1213.94	1088.2	8113.9		365.705	226.252	407.723	246.901	799.094	485.329	374.427	371.031	565.222	596.458	511.762	657.866	271.667	328.99	607.532		2.89979	6.94688	5.5375	3.85698	5.69131	6.67134	4.32861	5.43225	13.7026	4.9277	4.68997	4.16838	4.46849	3.30771	13.3555		0.1	0.386
1544.93	1118.71	2199.52	2468.57	3017.75	3413.46	1552.33	1165.87	1403.48	641.642	1237.06	2758.88	1278.66	3720.41	2882.77		293.095	231.778	345.524	527.403	496.014	484.492	386.335	216.848	263.178	282.233	303	336.295	355.413	539.199	611.382		5.2711	4.82666	6.36575	4.6806	6.084	7.04545	4.01809	5.37642	5.3328	2.27345	4.08269	8.20374	3.59768	6.89989	4.71516		0.226	0.262
1332.29	2120.93	1580.07	658.284	3635.36	3853.55	1248.15	659.209	2543.45	4144.79	3402.37	711.908	3321.93	7443.6	6006.84		201.793	261.768	299.91	276.697	597.591	506.466	249.717	196.781	476.607	862.483	433.149	217.701	572.688	1013.32	894.805		6.60224	8.10233	5.26847	2.37908	6.08335	7.6087	4.99826	3.34996	5.33659	4.80564	7.85496	3.27012	5.80059	7.34576	6.71302		0.411	0.389
1258.32	2422.34	3286.8	336.538	6377.59	7647	3853.55	964.312	3429.18	1801.96	1859.28	3406.99	2763.5	2885.54	6765.9		369.301	312.425	424.724	127.413	995.682	1013.98	555.026	160.612	457.376	681.563	389.449	476.993	677.394	306.419	1112.14		3.4073	7.75334	7.73867	2.64132	6.40525	7.54158	6.94301	6.00398	7.49751	2.64386	4.77414	7.14264	4.0796	9.41697	6.0837		0.116	0.312
1160.32	4726.33	5098	3750.93	3297.89	4116.12	2034.02	2678.44	3455.99	513.129	3371.86	1725.22	225.592	2670.12	6737.24		209.429	520.066	451.454	495.274	717.898	677.507	481.016	410.852	464.915	226.56	579.037	555.686	79.956	803.93	747.694		5.54039	9.08794	11.2924	7.57343	4.59382	6.0754	4.2286	6.51923	7.4336	2.26487	5.82322	3.10467	2.82145	3.32133	9.01069		0.332	0.22
195.081	449.334	3235.02	4252.96	1064.16	2024.78	2518.49	2230.03	8410.69	1322.12	1457.1	4335.24	1328.59	1901.81	7882.77		108.706	183.086	420.138	982.96	267.065	433.809	526.704	485.876	980.064	323.357	287.962	768.438	290.665	286.955	762.146		1.79457	2.45422	7.6999	4.32669	3.98466	4.66744	4.78161	4.58971	8.58177	4.08872	5.06005	5.64163	4.57085	6.62756	10.3429		0.207	0.168
2427.89	2408.47	5723.93	3665.86	2449.15	1241.68	3296.97	1469.12	1152.92	2769.05	2482.43	2845.78	5401.26	2222.63	5117.42		459.283	405.1	757.93	666.532	576.477	264.948	582.07	356.789	359.372	428.763	405.663	522.374	1217.78	307.449	652.974		5.28625	5.94537	7.55205	5.49991	4.24848	4.6865	5.66421	4.11762	3.20816	6.45822	6.11945	5.44779	4.43535	7.22927	7.83709		0.145	0.184
155.325	3461.54	5622.23	3871.12	389.238	1769.6	2045.12	1622.6	1017.01	427.145	6034.58	1499.63	4833.58	1218.57	1592.09		55.383	546.948	649.064	614.592	140.641	293.714	378.41	356.419	221.821	117.894	679.22	321.884	558.099	521.208	305.486		2.80456	6.32882	8.66205	6.29868	2.7676	6.02491	5.4045	4.5525	4.58483	3.62313	8.88457	4.65891	8.66079	2.33796	5.21165		0.636	0.145
957.84	2815.27	1790.87	1684.54	1183.43	3225.78	993.898	3873.89	6419.19	2425.11	3691.75	2348.37	1842.64	1343.38	2607.25		279.263	765.445	280.293	330.623	354.423	452.773	234.759	786.309	1006.89	309.702	448.64	435.419	334.839	190.488	613.845		3.42989	3.67796	6.38926	5.09505	3.33904	7.12449	4.23369	4.92668	6.37527	7.83047	8.22876	5.39336	5.50307	7.05231	4.24741		0.154	0.06
113.72	3084.32	1315.64	5143.31	1788.09	2695.08	5101.7	5961.54	12713.6	827.478	1852.81	733.173	532.544	1495.01	12634.1		44.174	472.977	240.432	567.328	394.341	480.903	916.249	954.227	1610.5	284.076	418.356	158.416	110.532	223.647	1364.69		2.57437	6.52108	5.472	9.06584	4.53438	5.60421	5.56803	6.24751	7.89418	2.91288	4.42879	4.62815	4.81801	6.68467	9.2578		0.732	0.173
103.55	2004.44	1440.46	2237.43	2820.82	1357.25	2762.57	1974.85	2063.61	3922.89	1193.6	5389.24	10359.7	1565.27	3308.99		86.755	469.751	279.183	411.745	691.782	244.084	539.738	492.401	435.152	605.5	265.727	714.552	2028.69	667.465	497.004		1.19359	4.26702	5.15955	5.43401	4.07762	5.56058	5.11836	4.01066	4.74227	6.47876	4.49184	7.54212	5.10657	2.3451	6.65787		0.173	0.114
776.627	4722.63	5727.63	5869.08	2285.5	2145.89	933.802	335.614	3579.88	3112.98	1684.54	1840.79	1214.87	2490.75	2307.69		259.179	555.283	572.278	1155.38	492.555	380.413	201.23	120.847	913.512	718.415	531.846	554.64	296.844	386.046	401.953		2.99649	8.50491	10.0085	5.07977	4.6401	5.64096	4.64047	2.77718	3.91881	4.33312	3.16735	3.31889	4.09261	6.45196	5.7412		0.145	0.192
2224.48	2246.67	1496.86	2667.34	5730.4	5056.4	1200.07	1954.51	5758.14	644.416	4188.24	872.781	2747.78	1411.8	6463.57		507.593	555.436	268.384	408.696	788.432	786.969	330.14	359.646	645.475	320.091	844.668	337.149	430.26	230.953	847.091		4.38241	4.04488	5.5773	6.52648	7.2681	6.42516	3.63505	5.43454	8.92077	2.01323	4.95845	2.58871	6.38633	6.11292	7.63032		0.108	0.092
3348.74	1824.15	1627.22	1243.53	3028.85	6437.69	3421.78	4613.54	3761.09	2021.08	7851.33	4090.24	886.649	337.463	2291.05		520.588	426.527	271.531	345.138	568.825	823.274	512.139	629.97	493.858	492.088	1070.24	570.675	197.054	142.058	436.762		6.43262	4.27675	5.99276	3.60299	5.32474	7.81961	6.68136	7.32342	7.61574	4.10715	7.33606	7.16737	4.49952	2.37553	5.24553		0.155	0.126
2649.78	2603.55	1728	2931.77	1711.35	1704.88	1134.43	9823.41	4857.62	4053.25	1347.08	4007.03	1223.19	2029.4	4546.04		503.2	737.822	358.793	533.099	319.454	325.167	231.476	1539.15	655.267	524.707	342.451	628.673	243.634	327.557	602.853		5.26585	3.5287	4.81614	5.49948	5.35712	5.2431	4.90085	6.38235	7.41319	7.72479	3.93364	6.37379	5.0206	6.19557	7.54088		0.132	0.06
138.683	1425.67	2573.96	5545.49	4107.8	1222.26	1956.36	1518.12	12810.7	2488.91	4510.91	3362.61	7031.25	3969.12	7522.19		78.926	397.874	378.063	1145.08	566.742	284.236	348.807	322.268	1142.79	439.915	482.979	383.202	968.638	554.543	1017.81		1.75713	3.58321	6.80829	4.84289	7.2481	4.30017	5.60872	4.71074	11.21	5.6577	9.33976	8.77504	7.2589	7.15746	7.39057		0.28	0.113
3607.62	894.046	4021.82	4504.44	4544.19	2524.96	778.476	2775.52	9634.8	1164.02	2050.67	5941.2	6829.7	867.234	5876.48		523.307	261.175	587.492	718.302	755.443	506.21	181.299	550.448	1646.47	217.645	503.587	598.354	1159.05	214.032	611.792		6.89388	3.42317	6.84574	6.27095	6.01527	4.98798	4.29388	5.04229	5.85177	5.34823	4.07212	9.92924	5.89252	4.05189	9.60535		0.166	0.165
117.419	1471.89	1713.2	4801.22	1599.48	1511.65	1245.38	2255.92	5248.71	776.627	3355.21	1174.19	3558.62	3629.81	784.948		62.842	414.449	294.608	625.584	334.839	320.951	209.759	294.978	916.852	148.664	475.207	307.626	475.15	501.727	599.797		1.86848	3.55145	5.8152	7.67478	4.77687	4.70991	5.93718	7.64775	5.7247	5.22404	7.06053	3.81693	7.48946	7.23463	1.30869		0.374	0.108
677.7	2046.97	415.126	3579.88	4062.5	2939.16	2125.55	2058.99	5824.7	833.95	1195.45	1182.51	1785.32	2100.59	3051.04		195.694	344.728	108.376	616.515	713.329	505.561	424.837	335.618	786.839	261.932	343.811	295.291	376.334	537.799	557.183		3.46306	5.93792	3.83042	5.80664	5.69513	5.81367	5.00322	6.13491	7.40266	3.18384	3.47706	4.00455	4.74397	3.90591	5.47582		0.222	0.216
177.515	2456.55	1951.74	7143.12	1459.87	2271.64	417.899	4766.09	5213.57	6139.05	7851.33	1573.6	644.416	1110.39	1458.95		158.939	573.057	324.467	1316.37	342.531	357.002	229.223	856.65	819.178	752.064	939.019	418.875	103.033	319.084	230.116		1.11688	4.28674	6.01521	5.42638	4.26202	6.36309	1.82311	5.56363	6.36439	8.16294	8.36121	3.75672	6.25446	3.47994	6.34006		0.088	0.094
2667.34	1519.05	4625.56	1584.69	11755.7	2665.5	2705.25	2432.51	1997.04	2931.77	1546.78	890.348	3307.14	1522.74	3652.92		648.751	283.672	459.259	623.154	1388.62	418.997	615.325	516.742	392.748	606.956	211.079	311.875	437.719	256.613	624.087		4.11151	5.35494	10.0718	2.54301	8.46575	6.36161	4.39646	4.70739	5.08479	4.83028	7.32798	2.85482	7.55539	5.93401	5.85323		0.08	0.237
798.817	1435.84	1045.67	2734.84	2940.09	2184.73	1115.94	10092.5	1749.26	2818.97	1097.45	1277.74	4965.79	443.787	10210.8		164.981	258.065	271.957	340.238	628.263	294.878	322.311	1435.11	292.395	367.708	255.35	423.341	706.353	195.831	1736.13		4.84187	5.56385	3.84499	8.03801	4.67971	7.40891	3.46231	7.03255	5.98252	7.66633	4.29782	3.01822	7.03018	2.26617	5.88134		0.369	0.271
4818.79	2482.43	1922.15	845.044	3617.79	11858.4	981.879	6798.26	761.834	1351.7	966.161	9866.86	3011.28	1908.28	6405.32		926.354	325.991	405.163	221.781	558.526	869.079	294.938	722.028	140.175	258.262	296.377	1186.89	494.051	476.51	968.678		5.20189	7.61504	4.74414	3.81026	6.47739	13.6447	3.3291	9.41551	5.43488	5.23384	3.25991	8.31324	6.09508	4.00471	6.61244		0.071	0.294
1300.85	3157.36	3119.45	1241.68	2221.71	2144.97	1780.69	326.368	6301.77	955.067	3232.25	1977.63	1708.58	2246.67	4188.24		267.725	312.641	689.762	308.359	432.256	604.93	424.274	72.127	913.673	358.149	443.818	511.006	261.682	473.364	399.217		4.85891	10.099	4.52251	4.02673	5.1398	3.54582	4.19704	4.52491	6.89719	2.66668	7.28283	3.87006	6.52922	4.74618	10.4911		0.228	0.406
9214.13	9687.5	3897	1848.19	1307.32	1926.78	1876.85	826.553	1357.25	5392.94	1377.59	3448.59	5089.68	3517.01	3829.51		1530.48	830.547	526.727	263.548	379.286	389.932	417.691	252.863	188.332	1131.92	386.062	397.504	717.932	425.81	647.204		6.02042	11.664	7.39853	7.01272	3.4468	4.94131	4.49339	3.26878	7.20668	4.7644	3.56831	8.67562	7.08937	8.25958	5.91701		0.049	0.176
1089.13	2435.28	2487.06	301.405	2876.29	2132.95	2776.44	2373.34	2928.07	473.373	2636.83	3268.31	2353.92	3690.83	6567.12		257.136	282.936	361.102	112.029	535.079	419.108	491.275	534.653	481.29	214.515	631.393	561.392	592.015	647.614	678.11		4.23561	8.60718	6.88741	2.69042	5.37546	5.08926	5.6515	4.43902	6.0838	2.20671	4.17622	5.82179	3.97612	5.69912	9.68445		0.207	0.382
113.72	2358.54	1763.13	1470.97	4054.18	2157.91	4934.36	2695.08	2152.37	3572.49	2720.97	635.17	3100.96	1101.15	3484.65		48.584	349.837	379.07	243.538	703.617	299.097	1108.62	449.337	332.723	829.637	939.625	185.612	470.741	364.795	634.169		2.34069	6.74183	4.6512	6.04	5.76191	7.21476	4.4509	5.99791	6.46895	4.30608	2.8958	3.42203	6.58741	3.01853	5.49483		0.605	0.242
4411.98	9094.86	3675.11	1787.17	950.444	6500.56	2043.27	2012.76	2253.14	911.612	2597.08	1057.69	6040.13	1785.32	3980.21		762.902	788.682	511.786	380.993	187.302	863.489	531.37	403.587	469.904	312.325	316.501	283.849	891.835	417.651	772.864		5.78316	11.5317	7.18095	4.69081	5.07439	7.52824	3.84528	4.98718	4.7949	2.91879	8.20559	3.72625	6.77269	4.27466	5.14995		0.095	0.184
625	5172.89	1703.03	3909.02	973.558	7078.4	1326.74	2264.24	2994.64	777.552	3162.91	1905.51	2361.32	1793.64	2375.18		162.302	818.325	376.414	610.489	292.901	823.764	266.188	382.296	415.632	308.929	328.7	487.155	492.361	389.562	719.661		3.85085	6.32132	4.52436	6.4031	3.32385	8.59275	4.98421	5.92274	7.20502	2.51693	9.62247	3.91151	4.79591	4.60425	3.30042		0.298	0.097
775.703	4301.04	1597.63	766.457	3650.15	1765.9	1356.32	1955.44	2383.51	5555.66	1379.44	2034.02	281.99	3270.16	1561.58		239.908	906.963	281.186	161.642	585.199	473.284	311.762	271.627	452.807	1019.48	387.309	357.233	156.879	898.554	389.152		3.23334	4.74224	5.68177	4.74169	6.23745	3.73117	4.35051	7.19898	5.26385	5.44949	3.5616	5.69383	1.7975	3.63935	4.01276		0.169	0.066
980.954	728.55	1281.43	3139.79	949.519	9903.85	3739.83	4642.2	1698.41	1252.77	939.349	1512.57	9082.84	5282.91	4990.75		203.056	169.431	283.069	501.92	225.53	1141.78	736.896	779.913	196.257	428.723	268.111	412.503	1584.02	1073.88	593.568		4.83095	4.29998	4.52694	6.25556	4.21017	8.67405	5.07511	5.9522	8.65401	2.92211	3.50358	3.66682	5.73404	4.91945	8.40806		0.299	0.319
4521.08	13106.5	1267.57	6029.03	2912.35	1589.31	685.096	453.033	1890.72	837.648	1973	9786.43	3779.59	1559.73	2598.93		757.503	1609.9	330.35	727.684	601.574	283.479	202.3	154.94	287.052	224.444	294.801	678.3	730.54	204.746	509.186		5.9684	8.14121	3.83704	8.28523	4.84122	5.60645	3.38653	2.92393	6.58667	3.7321	6.69266	14.4279	5.17369	7.61786	5.10408		0.099	0.064
4536.8	339.312	1836.17	3128.7	2941.01	3905.32	5304.18	5837.65	7989.09	402.182	1440.46	4025.52	7259.61	338.388	5596.34		799.617	127.84	429.89	503.433	489.545	499.007	587.509	695.225	662.669	83.376	340.238	436.064	1068.97	67.814	593.101		5.67371	2.65419	4.27125	6.21473	6.00765	7.82619	9.02825	8.39678	12.0559	4.82371	4.23368	9.23148	6.79119	4.98994	9.43573		0.089	0.261
1287.91	2996.49	1792.71	4662.54	6797.34	2239.28	4726.33	2058.99	1596.71	779.401	588.018	2211.54	5980.95	2708.95	3582.66		185.515	537.316	384.219	971.318	1221.54	432.199	477.813	381.17	302.533	261.039	259.236	537.695	898.314	401.607	1003		6.94233	5.57677	4.66587	4.80022	5.56455	5.18112	9.89159	5.40176	5.2778	2.98576	2.26827	4.113	6.65798	6.74528	3.57195		0.47	0.13
1061.39	4291.79	983.728	1087.28	1396.08	1680.84	1833.39	2134.8	7948.41	5219.12	797.892	4693.05	975.407	1337.83	1410.87		165.351	949.078	287.809	226.657	338.259	359.452	321.941	385.346	878.76	514.062	235.942	787.806	186.739	354.923	186.039		6.41902	4.52206	3.41799	4.79702	4.12725	4.67613	5.69482	5.53996	9.04503	10.1527	3.38173	5.95711	5.22337	3.76936	7.58375		0.488	0.06
1387.76	4876.11	1090.98	840.422	2787.54	1537.54	1623.52	3923.82	1270.34	791.42	1962.83	2205.99	8709.32	1089.13	2118.16		237.109	820.515	316.211	261.682	430.026	387.365	342.958	657.053	282.313	248.084	405.316	627.227	938.183	311.295	458.849		5.85283	5.94274	3.45015	3.21162	6.48225	3.96922	4.73388	5.97184	4.49976	3.19013	4.84272	3.51705	9.28318	3.4987	4.61624		0.31	0.091
2034.02	1494.08	2770.89	721.154	2909.58	4801.22	2912.35	1268.49	1844.49	1343.38	2246.67	4099.48	232.064	2883.69	3947.86		242.645	562.389	455.22	213.178	551.454	512.192	509.186	223.647	248.92	370.364	401.897	557.126	78.13	521.344	755.243		8.38272	2.65667	6.08694	3.38287	5.27619	9.37387	5.71962	5.67184	7.40997	3.62719	5.59017	7.35827	2.97023	5.53126	5.22726		0.434	0.059
722.078	1497.78	1980.4	1377.59	3806.4	6115.02	2538.83	3508.69	2606.32	1775.15	1637.39	2115.39	6010.54	2619.27	3826.74		204.61	326.913	318.328	320.831	591.588	846.608	623.774	751.887	509.766	496.344	258.206	522.044	1311.06	393.641	637.935		3.52905	4.58159	6.22125	4.29382	6.4342	7.22296	4.07011	4.66651	5.11279	3.57645	6.34141	4.05212	4.58448	6.65395	5.99863		0.217	0.176
1708.58	4274.22	2349.3	1374.82	1968.38	10405	1369.27	3560.47	9095.78	352.256	1675.3	5592.64	7750.56	1388.68	5971.71		352.323	660.416	353.177	235.692	317.065	621.991	227.3	751.074	824.361	148.487	299.274	735.183	1008.02	409.879	633.469		4.84947	6.47202	6.6519	5.8331	6.20813	16.7285	6.02406	4.7405	11.0337	2.3723	5.59787	7.60714	7.68891	3.38803	9.42699		0.173	0.123
108.173	1809.36	4191.01	6189.9	3698.22	7021.08	585.244	3860.02	1480.21	2366.86	3173.08	2080.25	327.293	2708.03	1712.28		63.308	380.51	596.174	1047	729.333	535.674	188.485	825.454	200.007	666.218	578.803	365.391	86.852	446.964	557.166		1.70868	4.75508	7.02985	5.91203	5.07069	13.107	3.10499	4.67624	7.40081	3.55269	5.48214	5.69322	3.7684	6.05871	3.07319		0.339	0.157
747.041	2463.02	1653.11	3136.09	1847.26	3394.97	1168.64	7163.46	1439.53	771.08	9240.94	1677.14	243.158	2496.3	1079.88		221.781	440.165	258.302	457.126	365.785	478.49	266.558	839.286	329.263	251.97	1382.25	331.129	70.204	475.207	250.473		3.36837	5.59567	6.3999	6.86046	5.05013	7.09517	4.38418	8.53519	4.37199	3.06021	6.68543	5.06493	3.46359	5.25308	4.31137		0.191	0.16
1028.11	2640.53	1998.89	931.953	4641.27	3782.36	1674.37	2320.64	2692.31	2671.04	2167.16	2392.75	7593.38	783.099	2302.14		269.978	616.805	526.124	195.791	807.81	528.127	358.793	375.44	409.766	534.283	378.25	615.775	1020.89	230.156	529.286		3.80811	4.28099	3.79928	4.75994	5.7455	7.16184	4.66668	6.18111	6.57035	4.9993	5.72944	3.88576	7.43799	3.40247	4.34953		0.177	0.087
2997.41	4595.97	1507.95	3488.35	6930.47	6274.04	732.249	1487.61	1068.79	1170.49	5727.63	2603.55	3075.07	2996.49	1015.16		530.606	788.836	322.231	565.945	919.708	912.829	209.099	306.749	192.178	346.587	980.54	396.651	373.477	995.191	376.43		5.64903	5.82627	4.67972	6.16376	7.53551	6.87318	3.50192	4.8496	5.56144	3.37718	5.8413	6.56383	8.23364	3.01097	2.69682		0.134	0.093
742.419	2279.96	324.519	1938.79	3100.04	4202.11	1539.39	2137.57	1443.23	2916.05	2092.27	5634.25	4238.17	2268.86	2279.96		159.309	289.948	125.023	264.208	447.141	660.103	283.672	395.974	323.767	883.596	719.494	982.76	731.473	596.328	533.333		4.66025	7.86333	2.59567	7.33814	6.93302	6.36584	5.42664	5.39827	4.45763	3.30021	2.90798	5.73308	5.79402	3.80472	4.27492		0.368	0.341
1130.73	1732.62	479.845	5396.64	2571.19	4319.53	3538.28	1743.71	2380.73	845.044	1975.78	6449.7	5141.46	945.821	7834.69		239.692	261.159	307.699	491.098	578.81	703.304	551.244	289.908	352.887	280.639	503.813	500.6	640.132	315.358	893.575		4.71744	6.63434	1.55946	10.9889	4.4422	6.14176	6.41871	6.01471	6.74644	3.01114	3.92165	12.8839	8.03187	2.9992	8.7678		0.247	0.319
1709.5	1213.94	1097.45	1159.39	11000.4	2135.72	1058.62	2656.25	2134.8	624.075	4634.8	2821.75	1491.31	3934.91	6821.38		375.07	193.401	238.468	269.994	1964.6	480.606	241.131	450.19	346.184	223.374	436.922	419.984	260.322	532.729	922.155		4.55783	6.27681	4.60208	4.29414	5.59929	4.44382	4.39022	5.90029	6.16666	2.79386	10.6078	6.7187	5.72871	7.38633	7.39721		0.153	0.408
2588.76	2619.27	4764.24	1161.24	406.805	1151.07	1004.99	3272	2033.1	1740.02	3439.35	968.935	2522.19	8353.36	4871.49		397.351	411.496	721.431	279.826	180.309	264.948	198.317	345.154	294.278	515.598	415.205	212.728	547.414	1102.74	631.916		6.51504	6.36523	6.60387	4.14988	2.25615	4.34452	5.06761	9.47984	6.90877	3.37475	8.2835	4.55481	4.60746	7.57512	7.70907		0.206	0.194
1143.68	3084.32	4276.07	830.251	954.142	1818.6	2181.03	3132.4	23939.5	3050.11	5779.4	4944.53	2650.7	5779.4	5838.57		213.195	462.525	474.997	189.362	326.97	294.511	418.424	466.798	1620.37	576.574	961.13	752.08	753.457	845.111	687.339		5.36446	6.66844	9.00231	4.38446	2.91813	6.17499	5.21248	6.71039	14.7741	5.29006	6.01313	6.57447	3.51805	6.83863	8.49446		0.316	0.181
512.204	5123.89	3672.34	6414.57	3179.55	3370.01	3246.12	3061.21	10545.5	1084.5	489.09	2557.32	4032.91	1177.88	4215.98		110.065	706.03	703.384	1122.07	661.946	584.129	443.858	763.056	1560.15	411.809	166.068	757.246	756.747	333.656	738.369		4.65365	7.25733	5.22096	5.71676	4.80334	5.76929	7.31341	4.01177	6.75926	2.63351	2.94512	3.37714	5.32928	3.53024	5.70985		0.531	0.129
894.97	1966.53	6419.19	1352.63	2749.63	2640.53	865.385	3026.07	4754.07	653.661	1324.89	608.358	3059.36	1361.87	5096.15		196.684	343.698	805.41	294.044	550.23	474.667	264.555	665.445	638.562	214.868	343.448	115.835	1119.38	284.139	1010.5		4.55029	5.72168	7.97009	4.60008	4.99724	5.56292	3.2711	4.54744	7.44496	3.04215	3.85761	5.25194	2.73307	4.79297	5.04319		0.291	0.209
632.396	3188.79	4507.21	1228.73	854.29	1416.42	3948.78	1661.43	4947.3	334.689	1612.43	519.601	4315.83	2200.44	5588.02		159.542	741.555	570.588	228	199.074	262.792	772.421	281.983	683.783	115.328	514.573	220.984	913.996	389.948	825.744		3.96382	4.30014	7.89924	5.38919	4.29132	5.38989	5.11221	5.89194	7.23519	2.90206	3.13352	2.35131	4.72193	5.64292	6.76725		0.312	0.073
1789.94	2139.42	2138.5	706.361	6870.38	2159.76	761.834	1895.34	2520.34	1532.91	654.586	2394.6	771.08	1950.81	7332.65		615.865	337.115	487.309	126.617	926.024	369.864	235.145	437.019	418.955	342.008	268.549	304.73	157.756	307.643	1293.85		2.90639	6.34627	4.38838	5.57872	7.41922	5.83934	3.23985	4.33697	6.01578	4.4821	2.43749	7.85811	4.8878	6.34116	5.66734		0.059	0.237
1059.54	2552.7	1836.17	306.953	3440.27	1080.81	5254.25	1994.27	1536.61	717.456	1179.73	2998.34	3022.37	1871.3	5967.09		221.627	400.907	380.606	140.135	701.291	230.969	794.042	437.775	429.89	233.866	487.852	510.039	439.505	248.22	883.516		4.78074	6.36731	4.82433	2.19041	4.90563	4.67944	6.6171	4.55546	3.57443	3.06781	2.41822	5.87864	6.87677	7.53888	6.7538		0.271	0.2
1361.87	1107.62	3540.13	1627.22	3142.57	3615.01	1034.58	4353.73	7225.41	3415.31	1887.94	2876.29	5053.62	2862.43	5455.81		253.853	221.337	554.696	290.938	569.171	734.483	330.736	526.26	1068.28	406.676	386.917	342.901	988.779	508.269	504.037		5.3648	5.00422	6.3821	5.59301	5.52131	4.92185	3.12811	8.27297	6.76362	8.39811	4.87945	8.38812	5.11097	5.63171	10.8242		0.266	0.284
1110.39	3786.98	9778.11	2418.64	3724.11	5000	1225.96	2010.91	8328.4	2354.84	1273.11	784.024	4313.98	1864.83	5125.74		257.522	417.691	954.734	399.547	513.909	575.834	215.255	396.184	1132.28	351.72	365.617	253.563	698.114	298.164	783.493		4.31183	9.06647	10.2417	6.05345	7.24664	8.68306	5.69539	5.0757	7.35541	6.69523	3.4821	3.09203	6.17948	6.25438	6.54216		0.21	0.273
1201.92	1231.51	2894.79	2057.14	3973.74	2723.74	2711.72	2417.71	3647.37	2937.32	2513.87	2074.7	1840.79	2862.43	2685.84		238.275	216.091	433.986	344.358	480.066	428.763	468.118	371.224	465.945	401.744	286.915	424.024	247.657	384.976	703.4		5.04427	5.69903	6.67023	5.97384	8.27749	6.35256	5.79282	6.51282	7.82791	7.31141	8.76172	4.89289	7.43282	7.43534	3.81836		0.266	0.331
1583.77	1029.03	1552.33	1073.41	893.121	3590.05	737.796	1465.42	1997.04	405.88	1416.42	1120.56	306.028	1310.1	6826.92		266.365	199.17	372.367	193.071	215.721	560.932	175.997	218.441	241.751	101.866	201.383	301.953	153.346	234.292	731.843		5.94584	5.1666	4.16882	5.55966	4.14017	6.40016	4.19209	6.70855	8.26074	3.98445	7.03346	3.71105	1.99567	5.59172	9.3284		0.281	0.326
109.098	3588.2	1944.34	1122.41	5388.31	6440.46	2033.1	1558.8	3198.96	3951.55	4961.17	1150.15	3039.02	2495.38	4089.31		67.718	462.075	271.571	190.215	875.454	817.835	388.202	470.508	469.131	675.881	785.986	299.137	322.464	749.321	751.614		1.61106	7.76541	7.15961	5.90075	6.15488	7.87501	5.23722	3.31302	6.81891	5.84652	6.31203	3.84489	9.42436	3.33018	5.44071		0.299	0.211
463.203	1306.4	4573.78	9584.87	4763.31	1743.71	455.806	7445.45	1134.43	4029.22	2072.86	1533.84	5717.46	644.416	3985.76		209.486	311.899	628.167	1194.48	627.16	338.765	170.341	1333.75	196.024	931.827	765.855	366.075	572.278	182.989	478.997		2.21114	4.18853	7.28115	8.02429	7.59505	5.14726	2.67584	5.58236	5.7872	4.324	2.70659	4.18996	9.9907	3.52161	8.32106		0.133	0.169
762.759	2783.84	10147	2890.16	8245.19	1090.05	931.953	634.246	2517.57	693.417	3208.21	5713.76	8468.93	1894.42	9080.99		167.041	446.618	731.347	522.607	1009.81	274.484	242.548	400.94	498.951	216.188	478.16	533.253	1250.63	433.873	550.424		4.5663	6.23315	13.8744	5.53028	8.16507	3.97128	3.84234	1.5819	5.04572	3.20747	6.70949	10.7149	6.77175	4.36629	16.4982		0.344	0.175
3048.26	4929.73	7069.16	2158.84	2090.42	1324.89	1774.22	1395.15	1887.02	703.587	6887.94	1254.62	996.672	4539.57	6076.18		311.859	623.347	571.191	326.133	450.964	259.332	404.576	327.42	240.665	112.922	905.46	276.737	288.388	464.915	539.432		9.77449	7.90849	12.3762	6.6195	4.63545	5.10885	4.38539	4.26106	7.84085	6.23073	7.60712	4.53363	3.45601	9.7643	11.264		0.394	0.159
1766.83	1259.25	9563.61	1647.56	2708.03	3052.89	853.365	4155.88	1532.91	3144.42	3871.12	8045.49	877.404	5798.82	6783.47		418.391	199.444	627.823	277.187	591.805	538.057	178.58	522.221	282.643	593.061	474.121	840.919	203.523	906.6	704.88		4.22291	6.31378	15.233	5.94385	4.57587	5.67391	4.77861	7.95809	5.4235	5.30201	8.16483	9.56749	4.31108	6.39622	9.62358		0.127	0.398
856.139	6565.27	3806.4	2831.92	3243.34	2341.9	2241.12	1532.91	2148.67	4994.45	1823.22	4732.8	2469.49	913.462	4375.93		171.917	591.782	312.724	441.622	550.544	358.524	371.611	242.645	315.222	1006.52	237.535	892.892	361.899	282.176	608.293		4.97996	11.0941	12.1717	6.41253	5.89116	6.53206	6.03083	6.31752	6.81637	4.9621	7.67561	5.30053	6.8237	3.23721	7.19378		0.364	0.236
750.74	3947.86	3873.89	2634.99	7097.82	2402.92	2899.41	3751.85	2649.78	1272.19	1752.03	2397.37	1813.06	1535.69	1333.21		142.098	357.686	852.344	412.189	652.564	560.369	441.308	662.042	552.354	268.424	381.403	589.022	369.084	416.638	375.867		5.28326	11.0372	4.54499	6.39266	10.8768	4.28811	6.57003	5.66709	4.79725	4.73948	4.59366	4.07009	4.91231	3.6859	3.54703		0.467	0.388
861.686	6356.32	5979.1	1038.28	8806.4	794.194	3596.52	4778.11	9070.82	1155.69	1764.05	11933.2	2053.44	447.485	2882.77		242.588	443.326	572.454	177.357	1207.47	192.218	629.43	665.558	887.749	385.186	606.676	987.926	415.785	88.308	563.555		3.55206	14.3378	10.4447	5.85416	7.29328	4.13174	5.71394	7.1791	10.2178	3.00036	2.90773	12.0791	4.9387	5.06732	5.11532		0.184	0.406
2176.41	2019.23	6854.66	965.237	3150.89	3559.54	710.059	2130.18	3383.88	1901.81	2071.93	9785.5	590.791	3294.19	6102.07		271.064	368.134	1133.04	235.145	556.233	589.045	234.332	273.776	395.428	556.193	198.704	1439.96	147.014	520.161	990.492		8.02912	5.48504	6.0498	4.10486	5.66469	6.0429	3.03014	7.78073	8.5575	3.41934	10.4272	6.79568	4.0186	6.33303	6.16065		0.372	0.187
1220.41	1751.11	2124.63	844.12	5006.47	1767.75	823.78	1189.9	2974.3	902.367	1944.34	7276.26	8440.27	1057.69	3846.15		192.645	244.493	297.891	197.304	731.666	452.943	212.688	255.965	424.917	197.714	402.107	978.39	1244.56	289.442	630.597		6.33504	7.16221	7.13224	4.27827	6.84256	3.90281	3.87319	4.6487	6.99971	4.564	4.83538	7.43697	6.78172	3.65425	6.09923		0.413	0.368
1022.56	2392.75	4768.86	1147.37	1684.54	4296.41	883.876	2266.09	1070.64	1556.95	1254.62	3866.49	5149.78	1795.49	2061.76		187.768	311.783	569.075	273.647	357.063	686.229	292.685	359.042	321.337	265.665	263.782	537.782	805.637	535.256	366.525		5.44586	7.67441	8.38002	4.1929	4.71777	6.2609	3.01989	6.31148	3.33182	5.86059	4.75629	7.18971	6.39218	3.35445	5.62516		0.364	0.309
1184.36	2166.24	8871.12	1180.66	1628.14	12410.3	904.216	2043.27	3626.11	471.524	1242.6	1151.07	3796.23	2686.76	9610.76		232.603	331.921	799.247	240.858	282.409	1216.43	210.902	294.591	473.171	136.932	435.562	363.702	604.407	531.273	1065.56		5.09175	6.52636	11.0993	4.90188	5.7652	10.2022	4.28738	6.93595	7.66342	3.44349	2.85288	3.16488	6.28091	5.05721	9.01948		0.275	0.247
2873.52	2112.61	2587.83	808.062	3367.23	2290.13	943.972	4365.75	3533.65	3081.55	375.37	1273.11	1683.62	3834.14	2238.35		639.375	614.359	511.109	202.26	660.706	434.203	226.287	593.841	566.998	582.956	257.949	337.479	566.218	522.551	691.058		4.49427	3.43872	5.06317	3.99516	5.09642	5.27432	4.17157	7.35172	6.23222	5.28607	1.45521	3.77242	2.97344	7.33734	3.23902		0.088	0.07
863.536	2203.22	4129.07	1350.78	2671.04	6699.33	1550.48	5313.43	9840.05	1256.47	2684.91	18002	2221.71	3704.7	1869.45		144.528	413.202	569.951	307.876	527.33	871.318	388.975	618.672	792.858	337.695	581.796	2027.06	363.669	572.494	699.627		5.97487	5.33206	7.2446	4.38741	5.06522	7.68874	3.98607	8.58844	12.4109	3.72073	4.61487	8.88087	6.10915	6.47115	2.67207		0.52	0.162
108.173	2881.84	590.791	820.081	1960.06	4713.39	2204.14	1815.83	4257.58	2369.64	4118.9	11698.4	1350.78	1257.4	3254.44		62.182	675.061	287.285	182.563	585.996	734.233	303.08	337.889	636.752	405.679	622.711	1198.19	404.906	488.322	653.167		1.73962	4.26901	2.05646	4.49204	3.34483	6.41947	7.27248	5.37404	6.6864	5.84117	6.61446	9.76339	3.33603	2.57493	4.98255		0.352	0.079
744.268	1545.86	3645.53	520.525	1154.77	7602.63	687.87	8901.63	2283.65	1798.26	2819.9	12007.2	2826.37	2901.26	509.43		223.494	270.678	589.649	187.358	270.154	815.822	167.934	967.769	418.158	327.163	794.348	1527.48	365.262	671.931	229.553		3.33015	5.71106	6.18253	2.77824	4.27449	9.31898	4.09607	9.19809	5.46122	5.49653	3.54995	7.86077	7.73792	4.31779	2.21923		0.187	0.265
4376.85	2000.74	1725.22	2268.86	2844.86	3011.28	1105.77	2701.55	711.908	1662.35	591.716	5771.08	4202.11	2475.96	706.361		674.771	363.572	275.514	472.761	519.285	546.971	211.779	526.607	216.148	353.756	121.974	663.265	659.926	440.632	275.594		6.48642	5.50301	6.26183	4.79917	5.47842	5.50537	5.22133	5.13011	3.29361	4.69915	4.85117	8.70102	6.36754	5.61912	2.56305		0.121	0.19
119.268	1971.15	3912.72	1149.22	3043.64	3590.05	928.254	4672.71	12150.5	915.311	806.213	3296.04	3700.07	1940.64	9024.59		54.256	421.031	520.451	360.072	499.434	676.597	177.55	861.196	1443.36	283.962	206.436	648.371	502.967	287.092	876.951		2.19825	4.68173	7.51795	3.19165	6.09418	5.30604	5.22813	5.42583	8.41821	3.22336	3.90539	5.08358	7.35649	6.75966	10.2909		0.509	0.14
1097.45	1854.66	2011.83	1316.57	1138.13	3655.7	1771.45	1360.02	4027.37	1185.28	2372.41	4178.07	4236.32	5997.6	17509.2		296.901	371.651	377.693	312.479	230.873	579.173	220.734	404.89	557.946	332.336	505.783	499.394	716.942	605.323	1347.36		3.69634	4.99033	5.32664	4.2133	4.92968	6.31192	8.02527	3.35899	7.2182	3.56651	4.69057	8.36628	5.90887	9.90809	12.9952		0.156	0.169
782.175	1119.64	7267.01	1482.06	1970.23	5900.52	503.883	5516.83	3245.19	3194.34	1554.18	2406.62	4031.07	1401.63	11532.9		108.939	256.283	1082.19	364.675	594.638	818.108	126.947	902.434	592.602	519.501	320.911	693.752	643.801	487.565	1127.05		7.17994	4.36876	6.71512	4.06407	3.31333	7.21239	3.96924	6.11327	5.47617	6.14887	4.84302	3.46899	6.26135	2.87475	10.2328		0.828	0.214
2325.26	1739.09	2521.26	1344.31	4936.21	3980.21	1702.11	1067.86	1643.86	1824.15	1166.79	4353.73	472.448	565.828	979.105		340.142	302.613	462.115	292.435	778.15	569.131	260.652	181.106	349.7	342.008	262.325	578.36	188.645	170.284	303.99		6.83614	5.74691	5.45593	4.59694	6.34351	6.99349	6.53019	5.89634	4.70077	5.33364	4.44788	7.52772	2.50443	3.32285	3.22085		0.253	0.239
110.022	2937.32	3696.38	4466.53	1824.15	2101.52	807.138	335.614	2597.08	845.044	1474.67	3013.13	2282.73	1935.1	4755.92		57.169	332.916	532.239	543.898	361.006	427.83	148.567	131.396	458.406	297.021	367.588	366.951	269.454	263.565	733.01		1.9245	8.82299	6.94496	8.21207	5.05296	4.91204	5.43282	2.55422	5.66545	2.84506	4.01174	8.21126	8.47168	7.34201	6.4882		0.423	0.333
147.004	4114.27	6029.96	2707.1	2047.89	2319.71	430.843	1802.88	4369.45	902.367	1076.18	1845.41	6033.65	2425.11	3659.39		109.502	467.265	803.914	677.95	281.94	486.342	112.882	464.915	628.304	274.307	398.864	335.732	1102.11	265.568	614.489		1.34248	8.80501	7.50075	3.99307	7.26357	4.76971	3.81676	3.87788	6.95436	3.28962	2.69812	5.49669	5.47463	9.13179	5.95518		0.154	0.237
105.399	4692.12	1273.11	5116.49	2144.97	1670.67	778.476	2817.12	2482.43	819.157	1586.54	3353.36	8934.91	3266.46	3272.93		52.663	685.433	299.757	682.656	289.02	285.499	131.219	635.433	577.677	185.202	521.561	474.394	1024.68	486.246	505.066		2.00139	6.84549	4.24715	7.49498	7.42153	5.85176	5.93265	4.43339	4.29727	4.42305	3.0419	7.06873	8.7197	6.7177	6.4802		0.478	0.126
159.024	2192.12	7876.29	1574.52	1792.71	2479.66	1779.77	4270.52	4217.82	4007.95	1636.46	5418.82	2430.66	4965.79	3456.92		80.849	503.417	1013.09	473.444	250.98	487.469	715.292	514.859	651.494	937.443	391.638	720.788	329.303	718.165	676.784		1.96693	4.35449	7.77456	3.32567	7.14286	5.08681	2.48817	8.29455	6.47408	4.27541	4.17851	7.51792	7.38122	6.91455	5.10786		0.306	0.109
900.518	1916.61	4482.25	1006.84	1952.66	2073.78	567.678	2871.67	8517.01	1449.7	2238.35	3912.72	1433.99	4782.73	4511.83		264.265	257.739	580.75	278.893	303.424	455.413	121.041	566.628	834.586	380.493	402.073	941.588	234.389	1058.47	689.922		3.40763	7.43622	7.71804	3.61014	6.43543	4.55362	4.68996	5.068	10.2051	3.81007	5.56703	4.15545	6.11798	4.51854	6.53963		0.162	0.363
952.293	3531.8	5978.18	4244.64	391.087	6080.81	781.25	1106.69	1267.57	1219.49	1029.96	1585.61	6805.66	7605.4	7957.65		211.545	554.197	862.926	1081.08	291.735	799.874	231.243	295.637	245.131	194.101	258.906	396.498	930.08	1244.44	1110.01		4.50161	6.37283	6.9278	3.9263	1.34056	7.6022	3.37848	3.74342	5.17098	6.28276	3.97811	3.99905	7.31728	6.11149	7.16897		0.267	0.145
739.645	2860.58	3845.23	400.333	3057.51	3440.27	929.179	3203.59	3467.09	500.185	1629.99	5507.58	969.859	7768.12	4064.35		255.43	352.517	508.116	156.823	790.429	384.959	290.608	547.511	667.852	133.979	272.657	546.134	209.389	680.733	612.509		2.89569	8.11472	7.56762	2.55277	3.86816	8.93673	3.19736	5.85118	5.1914	3.73331	5.97818	10.0847	4.63185	11.4114	6.63557		0.142	0.289
1972.08	1637.39	2744.08	2683.06	10166.4	2598.93	1373.89	3979.29	2278.11	1786.24	2057.14	3756.47	2079.33	4191.01	11957.3		434.026	299.194	430.026	708.413	837.259	374.837	309.646	729.687	321.047	447.487	729.56	627	293.658	718.318	1633.2		4.54369	5.47267	6.3812	3.78743	12.1425	6.93349	4.43697	5.45342	7.09587	3.99172	2.8197	5.99118	7.08078	5.83448	7.32139		0.132	0.23
3558.62	2060.84	1667.9	1580.07	375.37	2637.76	606.509	4168.82	2958.58	560.281	1842.64	1815.83	5293.08	5549.19	3775.89		580.516	370.098	226.93	231.436	95.477	322.834	147.537	627.893	516.855	141.768	548.211	411.159	471.441	919.105	777.144		6.13009	5.56835	7.34984	6.82723	3.93152	8.17064	4.11089	6.63939	5.7242	3.9521	3.36119	4.41636	11.2275	6.0376	4.85867		0.133	0.189
1256.47	2695.08	1754.81	697.115	4795.67	2071.01	1157.54	5000	7238.35	1129.81	2107.99	2610.02	6303.62	5600.04	7222.63		301.543	593.778	434.942	149.597	458.969	257.876	358.013	712.419	680.597	218.441	377.05	484.049	926.701	765.759	831.61		4.16681	4.53887	4.03458	4.65995	10.4488	8.03101	3.23325	7.01834	10.6353	5.17214	5.59074	5.39206	6.80222	7.31305	8.68512		0.174	0.096
4252.96	2022.93	2572.11	2589.68	3906.25	1105.77	479.845	2524.96	5388.31	4142.94	890.348	3684.36	1663.28	7078.4	7647.93		692.288	377.283	314.908	643.881	519.325	201.23	124.694	499.217	711.679	484.009	250.9	640.775	169.624	718.905	1110.15		6.14334	5.36183	8.16783	4.02199	7.52178	5.49505	3.84818	5.05785	7.57127	8.55963	3.54862	5.74985	9.80567	9.84609	6.8891		0.112	0.179
1862.98	338.388	339.312	854.29	580.621	3660.32	1398.85	3157.36	2152.37	654.586	961.538	4191.01	1387.76	5816.38	4039.39		407.433	230.776	164.652	282.563	360.016	277.3	282.546	862.749	371.981	173.76	337.052	825.174	200.803	793.615	526.26		4.57248	1.4663	2.06078	3.02336	1.61276	13.1998	4.95089	3.65965	5.78623	3.76718	2.85279	5.07894	6.91105	7.32897	7.67565		0.141	0.08
4107.8	1527.37	3384.8	2005.36	2426.04	3663.09	707.286	6870.38	5294.01	532.544	2877.22	1809.36	3901.63	8266.46	1650.33		759.636	333.616	434.709	580.67	457.319	302.243	135.009	1205.99	480.766	106.453	367.651	318.424	644.075	973.611	436.745		5.40759	4.57822	7.78636	3.45353	5.30491	12.1197	5.23881	5.69689	11.0116	5.00262	7.82595	5.68223	6.05772	8.49051	3.77871		0.089	0.172
147.929	4463.76	9498.89	1012.39	1209.32	2377.96	655.51	2515.72	15933.8	1062.32	1399.78	3041.79	4252.96	2513.87	6641.09		109.406	502.017	1387.15	222.151	329.673	362.325	160.999	641.065	928.544	286.022	406.95	482.086	504.89	356.733	1119.65		1.35211	8.89165	6.84777	4.55721	3.66824	6.56306	4.07152	3.92428	17.16	3.7141	3.43968	6.30964	8.42354	7.04692	5.93138		0.155	0.223
4458.21	853.365	5753.51	1715.05	1534.76	3009.43	2047.89	2847.63	7377.96	961.538	2476.89	3923.82	1281.43	469.675	6342.46		793.832	237.905	803.947	332.626	269.744	572.688	543.351	670.394	827.827	213.935	413.709	399.007	411.456	217.508	1358.34		5.61606	3.587	7.15658	5.1561	5.6897	5.25492	3.769	4.2477	8.91244	4.49453	5.98702	9.83396	3.11439	2.15935	4.66928		0.089	0.189
10582.5	1378.51	2500.93	592.641	2848.56	4733.73	1211.17	2195.82	7007.21	664.756	2192.12	3831.36	4773.48	1604.11	4695.82		1380.17	214.128	425.014	161.602	456.523	740.662	414.015	369.728	802.707	233.222	477.05	477.535	548.347	492.458	887.346		7.66749	6.4378	5.88434	3.66729	6.23968	6.39121	2.92542	5.93902	8.72948	2.85031	4.59516	8.0232	8.70522	3.25734	5.29198		0.07	0.378
2349.3	1975.78	1683.62	1602.26	1286.98	1473.74	1087.28	322.67	5038.83	483.543	1645.71	4852.07	5521.45	3688.98	5554.73		360.016	467.088	311.859	444.671	229.456	295.814	264.538	133.319	920.118	164.805	596.448	692.345	581.836	714.319	621.311		6.52553	4.22999	5.39865	3.60324	5.60884	4.98199	4.1101	2.42029	5.47629	2.93403	2.75918	7.00817	9.4897	5.16433	8.94034		0.228	0.114
2094.12	1834.32	3289.57	709.135	5330.99	3043.64	1086.35	2342.82	541.79	3430.1	3589.13	2111.69	3304.36	2690.46	7259.61		418.971	373.944	358.559	238.855	784.176	486.206	260.982	442.401	254.303	502.46	523.171	517.225	443.545	411.279	666.242		4.99825	4.90533	9.17442	2.96889	6.79821	6.25998	4.16256	5.2957	2.13049	6.82662	6.86033	4.08272	7.4499	6.54169	10.8964		0.15	0.165
1191.75	3698.22	6402.55	897.744	5644.42	4367.6	659.209	1425.67	3747.23	708.21	1290.68	1814.9	9018.12	18754.6	20322.7		289.635	510.176	748.154	251.173	1020.83	547.921	178.153	265.801	667.635	196.161	284.042	248.92	1540.12	1578.16	1319		4.11467	7.24892	8.5578	3.57421	5.52925	7.97123	3.70024	5.36366	5.61269	3.61035	4.54398	7.29111	5.85547	11.8838	15.4076		0.179	0.179
3469.86	1803.81	3457.84	3511.46	4042.16	4865.02	3787.91	3426.41	2803.25	4879.81	1888.87	2567.49	2074.7	2407.54	8615.94		514.665	311.295	462.196	673.484	899.601	516.622	608.953	358.038	518.158	581.04	327.693	380.896	422.721	610.063	927.361		6.74198	5.79453	7.48133	5.21388	4.49328	9.41697	6.22036	9.56995	5.41004	8.3984	5.76414	6.74067	4.90797	3.94639	9.29081		0.165	0.234
1261.1	2125.55	4856.69	1521.82	2076.55	2126.48	3248.89	1810.28	2269.79	477.996	1156.62	3737.06	1661.43	1722.45	2883.69		267.025	595.724	950.131	267.065	342.668	314.482	522.841	276.394	510.602	95.904	326.993	717.972	309.389	324.097	253.426		4.72276	3.56802	5.1116	5.69831	6.05996	6.76185	6.21392	6.54964	4.44531	4.98411	3.53714	5.20502	5.37003	5.31461	11.3788		0.222	0.075
3513.31	1080.81	3518.86	2281.8	2291.97	2760.72	1379.44	2181.03	8060.28	430.843	2252.22	2342.82	5635.17	410.503	3541.97		533.446	184.816	636.109	477.21	375.537	305.896	262.479	326.755	865.292	95.477	371.201	317.395	812.516	126.48	539.295		6.58607	5.84801	5.53185	4.78155	6.10319	9.02504	5.25542	6.67481	9.3151	4.51253	6.06738	7.38142	6.93546	3.2456	6.56779		0.155	0.398
2875.37	3135.17	2235.58	4069.9	1156.62	1168.64	1206.55	2988.17	6537.54	1392.38	6833.4	990.2	577.848	10723.9	3339.5		496.578	420.411	473.034	828.914	254.786	258.712	251.037	545.121	1214.51	280.196	961.766	307.569	301.35	1055.63	517.305		5.79037	7.45739	4.72604	4.90991	4.53957	4.51714	4.80625	5.48166	5.38286	4.96931	7.10505	3.21944	1.91753	10.1588	6.45557		0.147	0.223
570.451	1377.59	2225.41	3744.45	2264.24	6958.21	2138.5	4177.15	8863.72	1700.26	1024.41	3073.22	11861.1	1966.53	5765.53		151.987	249.717	375.44	558.059	479.616	1060.54	343.191	485.619	984.706	430.026	148.334	451.784	1368.6	277.573	941.772		3.75329	5.5166	5.92746	6.70978	4.72094	6.56099	6.23122	8.60169	9.00139	3.95385	6.90609	6.80242	8.66664	7.08473	6.12201		0.31	0.278
2978.92	3139.79	2079.33	1701.18	1401.63	5728.55	2287.35	2172.71	1421.97	1330.44	6769.6	5493.71	8699.15	4828.96	3957.1		521.988	733.976	374.37	411.689	350.843	801.524	479.97	388.202	374.04	240.432	915.259	408.189	910.906	759.546	556.933		5.70687	4.27779	5.5542	4.1322	3.99503	7.14707	4.76561	5.59685	3.80164	5.53352	7.39638	13.4587	9.55	6.35769	7.10517		0.137	0.073
992.973	9675.48	2342.82	2653.48	1093.75	5257.95	332.84	3268.31	4319.53	1201.92	4288.09	9677.33	497.411	12353	4916.79		263.702	1029.63	331.556	625.914	269.881	1094.27	165.778	561.712	718.165	439.618	684.659	988.399	109.502	2036.47	771.118		3.76551	9.39705	7.06615	4.23936	4.05271	4.80501	2.00775	5.81847	6.01467	2.73402	6.26311	9.79091	4.54248	6.06589	6.37618		0.179	0.115
101.701	2225.41	2003.51	841.346	2356.69	5460.43	6837.09	5132.21	5487.24	810.836	4080.99	905.141	1594.86	2895.71	2294.75		48.35	529.583	348.284	185.009	463.692	559.613	888.842	908.863	792.005	145.517	527.564	163.992	337.502	411.552	297.794		2.10343	4.20219	5.75253	4.54759	5.08246	9.75751	7.69214	5.64685	6.92829	5.5721	7.73554	5.51942	4.72548	7.03607	7.70583		0.547	0.1
1675.3	3257.21	4113.35	890.348	5060.1	2260.54	707.286	5768.31	2316.94	1467.27	348.558	2728.36	4448.96	7399.22	2384.43		263.645	478.803	588.829	227.92	869.218	399.974	238.332	610.376	480.96	619.695	145.614	553.103	586.672	963.006	453.667		6.35436	6.80282	6.98565	3.90641	5.82143	5.65172	2.96765	9.45041	4.81732	2.36773	2.39371	4.93283	7.58339	7.68347	5.2559		0.303	0.179
129.438	3027	2340.98	2009.06	1989.64	1609.65	1068.79	2335.43	4175.3	1250	992.973	1438.61	4921.41	1404.4	6139.05		98.76	509.476	477.403	469.558	306.419	357.143	228.66	485.079	391.018	282.739	216.421	282.859	924.424	312.462	924.328		1.31063	5.94139	4.90356	4.27862	6.49322	4.50702	4.67413	4.81453	10.678	4.42104	4.58815	5.08596	5.32376	4.49463	6.64164		0.167	0.147
1201.92	1714.13	3333.95	225.592	3475.41	1039.2	1085.43	5786.8	6723.37	529.771	1593.93	1369.27	1236.13	1335.06	4547.89		327.903	488.942	583.099	107.909	453.143	237.962	271.667	691.032	826.734	169.898	287.929	532.649	154.473	486.592	532.496		3.66548	3.50579	5.71764	2.09058	7.66956	4.36709	3.99544	8.37414	8.13245	3.11817	5.53586	2.57068	8.00225	2.74369	8.54071		0.14	0.09
1095.6	2879.07	3020.53	4441.57	1881.47	4803.07	559.357	1225.04	4559.91	387.389	346.709	3032.54	1620.75	4336.17	5448.41		256.806	587.252	623.564	591.202	427.5	798.241	123.857	282.353	791.725	96.371	135.999	511.302	247.617	627.82	505.05		4.26625	4.90261	4.84397	7.51278	4.4011	6.01707	4.51615	4.33867	5.75946	4.01977	2.54935	5.93102	6.54538	6.90671	10.7879		0.209	0.105
2009.06	4326.92	4666.23	595.414	4120.75	2063.61	2495.38	2158.84	5827.48	1139.98	1396.08	2613.72	4077.29	4694.9	2137.57		458.253	544.968	614.029	113.815	747.108	417.885	478.803	540.598	703.247	191.518	391.985	522.254	834.836	524.941	463.765		4.38417	7.93977	7.59937	5.23142	5.5156	4.93822	5.2117	3.99343	8.28653	5.95233	3.56156	5.00469	4.88394	8.94366	4.60917		0.12	0.183
4007.95	1801.04	1801.04	1588.39	1539.39	919.009	1158.47	1019.79	4015.35	931.028	353.18	1681.77	13522.6	1784.39	3009.43		1045.46	385.386	284.372	317.571	305.993	234.896	259.292	267.355	665.525	191.478	105.849	295.678	1269.13	311.006	456.756		3.83365	4.67333	6.33338	5.00168	5.03079	3.91241	4.46782	3.81435	6.03335	4.86232	3.33664	5.68784	10.6549	5.73749	6.5887		0.046	0.152
142.382	3035.32	1660.5	1103.92	1997.97	1053.99	660.133	424.371	7055.29	1697.48	9986.13	3928.44	1516.27	1860.21	7888.31		65.231	629.1	351.253	191.848	552.483	278.04	199.347	191.421	901.217	306.379	895.215	623.371	303.137	378.916	1186.87		2.18274	4.82486	4.72737	5.75414	3.61634	3.7908	3.31148	2.21695	7.82862	5.54047	11.155	6.30193	5.00194	4.90929	6.64632		0.42	0.096
1890.72	1642.01	1920.3	902.367	4269.6	3584.5	421.598	1305.47	2083.95	1466.35	3290.5	2095.97	6817.68	2760.72	4880.73		395.154	475.48	381.419	320.308	680.42	433.309	136.795	307.216	379.866	470.258	683.486	274.194	1150.09	473.637	1507.12		4.78476	3.45338	5.03463	2.81719	6.27495	8.2724	3.08197	4.24937	5.48601	3.11817	4.81428	7.64411	5.92795	5.82878	3.23845		0.152	0.091
453.033	3210.06	2221.71	2646.08	2147.74	4031.07	1489.46	1512.57	4038.46	676.775	1192.68	1548.63	4086.54	3419.01	2716.35		150.957	476.084	492.345	577.25	418.118	839.969	385.442	219.511	601.944	206.903	507.183	537.599	509.862	570.588	463.885		3.00107	6.74263	4.5125	4.58394	5.13669	4.79906	3.86429	6.89065	6.70903	3.27098	2.35157	2.88065	8.01499	5.99208	5.85565		0.25	0.178
655.51	2151.44	2109.84	4653.29	3199.89	4640.35	710.984	3678.81	3659.39	839.497	1076.18	2818.05	676.775	9312.13	7154.22		167.371	382.666	445.781	876.354	757.656	737.692	140.505	670.748	541.202	225.24	311.375	617.281	205.269	1132.87	1044.6		3.91651	5.62224	4.7329	5.30983	4.22341	6.29036	5.0602	5.48464	6.7616	3.72712	3.45623	4.56526	3.29702	8.21995	6.84879		0.294	0.185
4929.73	1689.16	4052.33	5173.82	3161.06	2745.93	1019.79	3577.11	3020.53	1359.1	719.305	2487.98	6651.26	1690.09	3523.48		677.837	300.03	650.487	976.684	509.709	423.887	237.149	520.804	678.497	332.176	197.287	432.103	977.321	207.273	786.262		7.27274	5.62998	6.22969	5.29733	6.20169	6.47798	4.30019	6.86843	4.45179	4.0915	3.64598	5.75784	6.8056	8.15393	4.48131		0.135	0.236
3884.99	3988.54	6546.78	6889.79	2435.28	3013.13	1018.86	1162.17	3575.26	1233.36	5929.18	1182.51	3620.56	4102.26	3632.58		657.15	738.426	660.223	1017.46	464.682	629.003	307.796	362.502	544.558	337.325	614.375	301.48	553.747	594.035	1023.51		5.91187	5.4014	9.91602	6.77159	5.24075	4.79033	3.31018	3.20596	6.56543	3.65629	9.65075	3.92234	6.5383	6.90575	3.54913		0.113	0.092
817.308	3098.19	5576	2139.42	759.061	6221.34	1806.58	4620.93	3710.24	2182.88	755.362	2565.64	1078.96	4614.46	16939.7		217.491	467.578	723.821	278	193.731	1102.56	260.925	476.084	524.281	443.665	256.789	814.819	238.332	546.754	1217.78		3.75789	6.62603	7.70356	7.69577	3.91812	5.64263	6.92376	9.70613	7.07682	4.9201	2.94157	3.14873	4.52712	8.43974	13.9104		0.217	0.178
2028.48	11590.2	11554.2	1425.67	1435.84	2442.68	981.879	4276.07	4776.26	1123.34	5193.23	2216.16	4575.63	3876.66	8736.13		457.916	1810.8	1353.83	284.896	352.71	418.295	313.395	686.036	432.129	265.955	629.857	656.103	667.055	772.091	1199.81		4.4298	6.4006	8.53443	5.00416	4.07087	5.83961	3.13304	6.23301	11.0528	4.22378	8.2451	3.37776	6.85945	5.02099	7.28128		0.122	0.044
739.645	1649.41	11186.2	3305.29	2088.57	6550.48	816.383	2883.69	3588.2	769.231	888.499	2653.48	2729.29	1079.88	7125.56		189.748	295.911	1287.49	661.173	633.236	1075.31	209.952	404.906	487.398	256.259	240.311	566.935	529.913	240.255	853.27		3.89804	5.574	8.68839	4.99913	3.29825	6.09173	3.88843	7.12188	7.36196	3.00177	3.69729	4.68039	5.15045	4.49473	8.35088		0.258	0.237
2157.91	935.651	1726.15	5021.27	1936.02	2608.17	2515.72	1941.57	2406.62	6933.25	389.238	4305.66	3250.74	1348	3375.55		412.832	198.1	399.274	720.281	354.246	354.44	385.812	302.847	415.535	1288	110.065	987.529	453.16	222.094	578.263		5.2271	4.72312	4.32321	6.97126	5.46519	7.35857	6.52058	6.41105	5.79162	5.38297	3.53644	4.36003	7.17349	6.06952	5.8374		0.159	0.3
4205.81	1461.72	3535.5	5706.36	968.01	4077.29	1129.81	3144.42	3112.06	1156.62	342.086	5044.38	6454.33	4392.57	3784.21		567.595	236.215	585.972	952.884	185.999	510.972	320.308	687.902	706.803	183.126	83.336	571.231	724.071	715.935	350.964		7.40987	6.1881	6.03357	5.98852	5.20438	7.97948	3.52726	4.57102	4.403	6.31598	4.1049	8.83072	8.91394	6.13543	10.7823		0.164	0.329
2413.09	1529.22	2542.53	1862.06	4070.82	4365.75	1705.81	2683.06	3605.77	1164.02	1211.17	4081.92	13544.7	6862.98	4557.14		297.134	398.96	403.103	407.103	421.417	684.016	457.786	447.511	491.975	434.669	227.88	806.883	1070.02	441.235	751.091		8.12122	3.83301	6.3074	4.57392	9.65984	6.38253	3.72621	5.99552	7.32917	2.67794	5.31494	5.05887	12.6584	15.554	6.06736		0.343	0.121
1564.35	1470.04	10459.5	13377.4	2598	6530.14	2685.84	2928.99	3042.71	956.916	1311.02	6478.36	490.939	1516.27	1478.37		344.261	305.896	856.787	1706.85	400.767	859.53	612.356	767.408	521.151	229.496	302.686	642.948	152.123	191.011	166.671		4.54408	4.8057	12.2078	7.83749	6.48258	7.59734	4.38607	3.81674	5.83845	4.16964	4.33129	10.076	3.22725	7.93814	8.86996		0.166	0.197
3832.29	1391.46	4212.28	1372.04	440.089	3718.57	1745.56	6315.64	3774.96	2491.68	3501.29	4155.88	1544.01	2339.13	5221.89		944.718	289.732	688.699	298.59	132.056	539.392	311.432	1168.24	787.436	499.434	531.603	646.174	307.779	436.086	625.471		4.05654	4.80257	6.11628	4.59507	3.33259	6.89399	5.60495	5.40611	4.79399	4.98901	6.58629	6.43152	5.01662	5.36391	8.34874		0.054	0.208
101.701	906.99	3495.75	9411.98	2981.69	5461.35	2293.82	1562.5	2859.65	1115.02	4068.97	3574.33	6610.58	1164.94	3642.75		72.594	228.483	648.314	1032.66	887.146	756.73	547.334	407.723	733.226	392.178	642.328	614.785	736.213	219.334	736.502		1.40096	3.96962	5.39206	9.11428	3.361	7.21704	4.1909	3.83226	3.9001	2.84314	6.33473	5.81396	8.97916	5.31127	4.94602		0.243	0.218
303.254	1105.77	5414.2	480.769	7181.03	2551.78	1245.38	1492.23	4616.31	1278.66	2390.9	2640.53	5102.63	3729.66	10713.8		79.393	324.78	639.729	141.108	1311.72	634.266	284.002	290.182	798.138	239.772	737.259	515.792	625.391	527.677	1427.7		3.81966	3.40467	8.46327	3.4071	5.4745	4.02319	4.3851	5.14241	5.78385	5.33282	3.24296	5.11938	8.1591	7.06807	7.50419		0.605	0.132
4455.44	1250	4754.07	3095.41	430.843	1924	816.383	2458.39	3217.46	1838.94	6351.7	4058.8	4726.33	3107.43	2551.78		613.265	260.499	737.372	712.806	127.51	340.745	237.752	476.687	635.779	369.084	1401.14	708.96	920.265	459.766	305.993		7.26511	4.79848	6.44731	4.34258	3.3789	5.64645	3.43376	5.15725	5.06065	4.98245	4.53322	5.72501	5.13584	6.75873	8.33932		0.149	0.231
3677.89	1825.07	4151.26	1906.43	2396.45	2711.72	2353	877.404	4264.98	936.575	10048.1	2338.2	1198.22	3928.44	5870.01		753.287	327.38	523.114	325.36	409.839	508.156	422.214	215.858	680.693	264.225	1286.93	767.595	316.711	612.139	660.199		4.88245	5.57479	7.93566	5.85946	5.8473	5.3364	5.57299	4.06473	6.26564	3.54461	7.80781	3.04614	3.78334	6.41756	8.89127		0.081	0.214
1472.82	1431.21	2084.87	1011.46	3290.5	3188.79	2514.79	4470.23	2037.72	1478.37	1330.44	1911.06	4001.48	2392.75	4807.69		356.17	297.521	401.487	184.446	366.252	523.967	362.969	874.191	655.17	362.189	397.994	587.622	710.859	425.224	708.686		4.13515	4.81046	5.19288	5.48379	8.98424	6.08587	6.9284	5.11356	3.11022	4.08175	3.34285	3.25219	5.62908	5.62704	6.78395		0.146	0.203
1813.06	911.612	3002.96	3253.51	1781.62	2472.26	1592.09	6422.89	2661.8	1280.51	5041.6	4167.9	1782.54	2723.74	2393.68		342.281	274.677	593.761	762.026	382.256	341.871	350.184	933.476	577.95	398.864	614.029	731.433	398.574	307.256	319.591		5.29698	3.31885	5.05752	4.26956	4.6608	7.23157	4.54643	6.88062	4.60558	3.21039	8.2107	5.69826	4.4723	8.86473	7.48981		0.194	0.152
1146.45	2836.54	8994.08	1974.85	1706.73	4395.34	1194.53	2504.62	3719.49	1320.27	340.237	7121.86	3142.57	974.482	3289.57		316.695	377.285	1180.5	382.883	362.599	737.999	245.461	446.304	369.534	280.856	178.716	1240.32	524.707	248.63	528.787		3.62004	7.51829	7.6189	5.15785	4.70694	5.95575	4.86646	5.61192	10.0654	4.70086	1.90379	5.74194	5.98918	3.91941	6.22098		0.144	0.25
3463.39	2217.09	4562.69	1075.26	4495.19	2038.65	1007.77	5309.73	4176.22	1362.8	882.951	1879.62	3601.15	1164.02	3235.95		758.26	251.696	516.822	272.907	978.56	367.338	224.87	901.717	622.164	380.646	193.128	351.43	800.624	257.176	353.78		4.56755	8.80859	8.82835	3.94002	4.59368	5.54978	4.48155	5.88846	6.71241	3.58022	4.57184	5.3485	4.49792	4.52615	9.14678		0.076	0.44
908.839	4727.26	7673.82	788.646	456.731	6309.17	2018.31	1562.5	7537.91	791.42	749.815	2341.9	3617.79	2403.85	1340.61		230.913	863.979	1046.75	214.128	102.236	772.034	493.641	398.864	609.959	288.838	209.196	571.481	944.781	323.437	296.474		3.93585	5.47149	7.33108	3.68306	4.46742	8.17214	4.08861	3.91738	12.3581	2.74001	3.58427	4.09795	3.82923	7.43219	4.52184		0.214	0.08
2450.07	1966.53	1394.23	644.416	3527.18	2552.7	2430.66	6020.71	3838.76	1977.63	405.88	4588.57	2046.97	5314.35	8944.16		638.072	614.489	255.446	220.051	501.3	578.337	539.915	843.148	360.449	429.6	132.852	994.395	469.051	488.555	1421.72		3.83981	3.20027	5.45803	2.92848	7.03607	4.41386	4.50193	7.14075	10.6499	4.60341	3.05513	4.61444	4.36406	10.8777	6.29106		0.076	0.065
135.91	1996.12	3561.39	839.497	2817.12	6292.53	1979.47	3282.18	6905.51	4967.64	10750.7	1397.93	1119.64	1567.12	850.592		55.713	589.915	508.816	163.855	452.967	588.032	384.646	604.1	1054.82	706.956	957.317	370.637	326.39	352.46	138.485		2.43947	3.38374	6.99937	5.12341	6.21927	10.701	5.14623	5.43317	6.54662	7.0268	11.2301	3.77169	3.43037	4.44624	6.14212		0.55	0.072
127.589	2456.55	1560.65	919.009	8095.41	3913.65	789.571	1584.69	7732.99	9287.17	2210.61	9471.15	1568.05	4399.04	1973.93		117.894	699.747	234.429	252.123	916.682	425.424	223.744	400.754	853.141	969.862	296.201	1127.18	450.337	473.887	322.367		1.08223	3.51062	6.65724	3.64508	8.83121	9.1994	3.5289	3.95427	9.06414	9.57576	7.46322	8.40251	3.48194	9.28288	6.12323		0.115	0.063
158.099	2018.31	2055.29	1304.55	2284.58	5222.82	1116.86	1312.87	3243.34	1917.53	2096.89	4228	3451.37	4604.29	2229.11		59.229	589.875	498.557	366.131	348.711	573.774	233.576	278.466	584.499	377.42	489.665	676.597	522.881	538.515	664.745		2.66928	3.42158	4.12247	3.56307	6.55149	9.10257	4.78159	4.71465	5.54893	5.08063	4.2823	6.24891	6.60068	8.54998	3.35332		0.566	0.073
1673.45	486.317	4309.36	200.629	1999.82	1666.05	1465.42	3027.92	3972.82	882.951	10591.7	7710.8	4908.47	867.234	5772		358.342	127.51	595.434	121.781	590.285	312.462	280.196	491.798	625.294	177.027	1049.2	865.332	896.238	283.109	606.45		4.66997	3.81395	7.23734	1.64746	3.38788	5.33201	5.22999	6.15684	6.35352	4.98766	10.095	8.9108	5.47675	3.06325	9.51769		0.164	0.376
13437.5	2644.23	1890.72	803.439	2618.34	3452.29	1981.32	6467.27	11714.1	727.626	2673.82	9871.49	18298.8	3522.56	6091.9		2304.83	447.977	452.967	199.267	514.585	383.656	408.696	717.915	1818.25	233.769	540.865	2386.51	1952.47	340.278	683.34		5.83015	5.9026	4.17407	4.03197	5.08826	8.99841	4.84792	9.00841	6.44254	3.11259	4.94359	4.13637	9.37215	10.352	8.91489		0.032	0.166
7384.43	3970.04	6122.41	3275.7	1291.61	1697.48	1493.16	4671.78	2825.44	1173.26	1395.15	726.701	5596.34	3021.45	3455.07		855.21	815.742	871.181	388.065	308.423	313.025	264.072	859.49	796.954	266.325	387.712	349.837	985.769	306.556	610.956		8.63464	4.86679	7.02771	8.44112	4.18777	5.42284	5.65436	5.43553	3.5453	4.40538	3.59843	2.07726	5.67713	9.85611	5.65518		0.127	0.075
106.324	2374.26	907.914	2845.78	4884.43	4509.06	3770.34	1691.94	2433.43	1951.74	4881.66	2902.18	2188.43	4742.97	8501.29		67.951	395.001	307.353	462.992	768.792	525.037	757.736	275.24	596.231	386.569	723.138	778.183	268.811	668.921	838.682		1.56472	6.01077	2.95398	6.14651	6.35338	8.58808	4.9758	6.14714	4.08136	5.04887	6.75066	3.72943	8.14113	7.09048	10.1365		0.289	0.191
1430.29	1643.86	3830.44	1456.18	1508.88	1409.95	728.55	1359.1	4562.69	1756.66	1690.09	8497.6	1210.24	6550.48	5926.4		252.397	345.661	550.93	311.955	416.115	291.695	123.897	280.663	917.198	283.439	422.231	925.108	345.814	734.983	752.337		5.66682	4.7557	6.95267	4.6679	3.6261	4.83364	5.88029	4.84246	4.97459	6.19765	4.00276	9.18552	3.4997	8.91243	7.87733		0.282	0.173
1180.66	2660.87	3228.55	3738.91	3047.34	9620.93	1433.99	1750.18	4066.2	567.678	714.682	5877.4	5109.1	6431.21	3411.61		314.538	442.651	583.526	468.818	321.544	1002.23	236.255	271.104	512.469	170.694	189.652	866.659	636.382	597.921	571.151		3.75363	6.01122	5.53283	7.97517	9.4772	9.59952	6.06966	6.45577	7.93452	3.32571	3.76839	6.78168	8.02835	10.756	5.97322		0.15	0.171
903.291	5414.2	1295.3	1590.24	2975.22	2794.01	3091.72	1180.66	4358.36	306.953	1862.98	1625.37	3832.29	4375.93	4876.11		200.667	932.873	410.482	359.726	327.321	461.496	429.793	250.007	505.665	107.909	523.364	533.019	889.865	860.496	685.529		4.50144	5.80379	3.15557	4.42069	9.08962	6.05424	7.1935	4.7225	8.61906	2.84455	3.55963	3.04937	4.30659	5.08535	7.11291		0.282	0.078
1048.45	514.978	1780.69	1375.74	2540.68	1973	1676.22	1940.64	3492.05	2959.5	3338.57	8667.71	2612.8	1289.76	7942.86		239.538	215.062	414.039	206.243	397.607	408.969	379.753	491.138	478.333	558.373	561.649	865.332	323.534	198.84	1031.25		4.37695	2.39456	4.30079	6.67048	6.38993	4.82433	4.41397	3.95132	7.30046	5.30023	5.94423	10.0166	8.0758	6.4864	7.70214		0.23	0.14
2685.84	355.954	1553.25	1003.14	2126.48	10249.6	1194.53	2491.68	2481.51	2342.82	764.608	1571.75	1912.91	4478.55	1102.07		535.506	142.798	348.96	225.723	361.094	1410.46	321.707	441.525	494.928	512.059	271.837	435.459	400.867	815.492	271.104		5.01551	2.49271	4.45109	4.44413	5.88899	7.26687	3.71309	5.64335	5.01388	4.5753	2.81274	3.6094	4.77192	5.49184	4.06512		0.118	0.219
270.895	1844.49	7718.19	4197.48	2593.38	5046.23	1515.35	4374.07	1974.85	930.104	3799	3981.14	2913.28	1558.8	1703.96		204.94	341.775	1103.29	812.073	334.014	855.41	360.539	425.344	369.108	268.151	1093.44	849.617	424.121	372.971	530.726		1.32183	5.3968	6.99559	5.16885	7.76429	5.89919	4.20301	10.2836	5.35034	3.46858	3.47434	4.6858	6.86898	4.17942	3.21062		0.081	0.198
2602.63	6811.21	4107.8	1205.62	1873.15	1675.3	3811.95	1000.37	2473.19	3995.01	905.141	1708.58	2014.61	2172.71	4056.95		395.371	615.903	656.216	173.607	280.236	327.147	924.424	205.639	328.603	708.509	303.306	459.196	386.472	489.022	661.502		6.58274	11.0589	6.25983	6.94454	6.68419	5.12093	4.12359	4.86469	7.52637	5.63861	2.98425	3.72081	5.21282	4.44296	6.13294		0.209	0.226
686.021	1867.6	2119.08	1234.28	3748.15	10576	3311.76	2347.45	5174.74	3353.36	4865.02	1626.29	4621.86	6747.41	7788.46		196.257	310.152	347.021	210.845	711.236	946.825	682.036	389.795	778.6	608.833	1063.83	450.907	580.147	738.836	770.095		3.49552	6.02158	6.1065	5.85398	5.26991	11.17	4.8557	6.02226	6.64621	5.50786	4.57313	3.60672	7.9667	9.13249	10.1136		0.224	0.244
1492.23	2649.78	4080.99	2970.6	381.842	1397.93	1203.77	1146.45	2806.03	4267.75	1964.68	1412.72	5696.19	3921.04	2625.74		300.473	404.443	586.769	399.217	79.723	371.241	223.687	358.712	605.05	820.804	479.56	334.156	864.109	908.42	470.314		4.96628	6.55167	6.95502	7.44106	4.78961	3.76556	5.3815	3.19602	4.63768	5.19948	4.09684	4.22773	6.59198	4.31633	5.58295		0.208	0.204
126.664	6321.19	3470.78	844.12	4879.81	1734.47	1229.66	1899.04	2618.34	1778.85	1330.44	6034.58	5221.89	11468.2	11861.1		56.839	478.627	499.337	189.458	869.975	370.621	316.871	412.912	380.606	352.437	415.552	805.193	464.022	718.945	1019.21		2.22847	13.2069	6.95078	4.45545	5.60914	4.67989	3.88063	4.59913	6.87941	5.04727	3.20161	7.49457	11.2535	15.9514	11.6376		0.493	0.347
585.244	4541.42	2698.78	888.499	2958.58	4366.68	968.01	1137.2	1618.9	470.599	1359.1	1497.78	5283.84	3659.39	8081.55		127.936	484.322	552.54	265.528	596.658	573.637	303.876	235.186	299.097	136.522	230.736	293.328	861.952	720.675	1144.4		4.57451	9.37686	4.88432	3.34616	4.95859	7.61227	3.18554	4.83534	5.41262	3.44706	5.89027	5.10616	6.13008	5.07773	7.06181		0.449	0.243
109.098	3306.21	1819.53	614.83	2399.22	3442.12	792.345	1267.57	3967.27	1699.33	1088.2	1663.28	7501.85	2729.29	6802.89		44.971	346.756	368.271	153.403	452.267	790.349	232.603	239.965	794.452	439.409	409.639	448.107	743.591	353.643	1016.22		2.42596	9.5347	4.94073	4.00794	5.30488	4.35519	3.40643	5.2823	4.99372	3.86732	2.65649	3.71179	10.0887	7.71764	6.69433		0.678	0.346
1470.97	6446.93	2236.5	686.021	3248.89	1903.66	1348	2179.18	2884.61	880.178	1692.86	2366.86	12218	8022.37	1180.66		502.943	743.035	371.594	154.433	460.812	358.929	300.94	447.237	450.52	177.027	368.754	614.689	983.523	883.886	234.622		2.92472	8.67648	6.01867	4.44219	7.05036	5.30373	4.47931	4.87254	6.40286	4.972	4.59076	3.85051	12.4227	9.07625	5.03217		0.073	0.147
1161.24	8283.1	2817.12	1477.44	5082.29	4965.79	1145.53	428.994	3463.39	1966.53	3204.51	10319.9	11535.7	2032.17	2316.01		268.151	1036.57	464.738	325.167	761.559	755.29	496.931	283.906	525.754	304.03	405.333	1985.6	1457.06	266.928	512.002		4.33056	7.99085	6.06174	4.54364	6.67353	6.57468	2.3052	1.51104	6.58747	6.46821	7.90587	5.19736	7.91712	7.6132	4.52345		0.203	0.097
625.925	844.12	5107.25	1974.85	1470.97	3353.36	3039.02	1360.02	3560.47	3799	1586.54	2058.06	2046.04	2466.72	3123.15		168.594	294.181	791.185	264.965	339.305	577.62	575.214	363.532	428.297	658.726	482.416	377.477	318.424	391.058	1128.23		3.71262	2.86939	6.45519	7.45326	4.33524	5.80549	5.28328	3.74113	8.31308	5.76719	3.28873	5.45215	6.42553	6.3078	2.76819		0.277	0.123
1616.12	3903.48	3892.38	1451.55	2747.78	2483.36	970.784	2945.64	3414.39	3696.38	2181.03	1227.81	17290.1	3753.7	2111.69		235.885	589.319	494.148	315.318	530.163	535.192	270.404	389.795	324.609	712.242	619.581	379.15	2844.99	393.135	501.88		6.85132	6.62371	7.87696	4.60346	5.1829	4.64013	3.59012	7.55689	10.5185	5.18978	3.52017	3.23833	6.07739	9.54811	4.20755		0.365	0.141
1418.27	2562.87	3089.87	1875	3546.6	5495.56	571.376	1423.82	2218.01	2469.49	1169.56	1393.31	3232.25	10671.2	2153.29		305.02	639.592	558.429	468.955	664.182	767.102	161.175	262.479	260.257	619.325	394.864	393.441	512.196	1126.22	461.569		4.64976	4.00704	5.53314	3.99825	5.3398	7.16406	3.54507	5.4245	8.52238	3.98739	2.96194	3.54133	6.31057	9.47523	4.66516		0.192	0.079
7438.98	1759.43	4569.16	1437.68	3935.84	4798.45	1115.94	4508.14	1664.2	1492.23	2557.32	5048.08	962.463	3873.89	2064.53		761.696	361.472	640.075	260.885	858.67	725.334	351.607	609.653	254.664	423.88	489.602	734.773	339.578	827.707	472.407		9.76634	4.8674	7.13847	5.5108	4.58364	6.6155	3.17382	7.39459	6.53489	3.52042	5.22327	6.87025	2.83429	4.68027	4.37024		0.161	0.169
624.075	1113.17	2459.32	221.893	4158.65	1789.02	674.926	2167.16	4705.07	708.21	1390.53	4093.01	2984.47	1649.41	2546.23		194.141	235.652	389.602	87.688	391.678	293.794	206.629	354.963	646.659	329.263	473.711	513.362	596.054	201.56	489.489		3.21455	4.72377	6.31239	2.53048	10.6175	6.08936	3.26637	6.10531	7.27596	2.15089	2.9354	7.97295	5.00704	8.18321	5.20181		0.208	0.252
652.737	1593.01	2808.8	1113.17	3243.34	1765.9	601.886	5778.48	2285.5	550.111	2002.59	5550.11	851.516	4035.69	6315.64		192.411	227.3	430.976	281.709	410.777	396.827	191.808	896.005	401.06	190.215	530.043	817.682	354.206	695.401	1280.11		3.39241	7.0084	6.5173	3.95147	7.89563	4.45006	3.13796	6.44916	5.69866	2.89205	3.77816	6.78762	2.40401	5.8034	4.93367		0.222	0.387
4377.77	3764.79	11586.5	820.081	2865.2	10222.8	332.84	2874.45	1908.28	1418.27	925.481	4277.92	6176.04	6174.19	4495.19		566.822	530.726	937.009	205.736	392.208	558.638	131.919	474.024	318.754	297.037	277.517	700.004	667.972	761.213	609.926		7.72337	7.09367	12.3655	3.98608	7.30531	18.2995	2.52306	6.06392	5.9867	4.77472	3.33486	6.11128	9.24595	8.11098	7.37006		0.171	0.168
1589.31	2321.56	8820.27	396.635	2433.43	5095.23	1041.05	1315.64	5162.72	1754.81	1874.08	2297.52	4097.63	1932.32	3947.86		350.473	315.665	1432.89	107.676	420.916	476.986	197.754	366.195	818.655	329.906	752.307	412.389	603.923	281.089	558.679		4.53476	7.35451	6.15559	3.6836	5.78128	10.6821	5.26437	3.59274	6.30635	5.31912	2.4911	5.57125	6.78503	6.87441	7.06641		0.163	0.293
4365.75	2596.15	2357.62	2174.56	1127.96	3136.09	1761.28	1150.15	5667.53	793.269	6265.72	1352.63	1026.26	1550.48	2883.69		817.555	690.825	511.712	507.883	215.391	294.833	435.112	271.804	668.005	279.98	1021.35	513.089	257.836	485.916	924.254		5.34001	3.75805	4.60731	4.28161	5.2368	10.6369	4.04788	4.23153	8.48426	2.83331	6.13475	2.63624	3.98027	3.19084	3.12002		0.082	0.068
1327.66	1652.18	3294.19	806.213	2524.96	8488.35	8228.55	2524.04	4855.77	2010.91	4497.04	2071.01	3472.63	2102.44	5708.21		241.558	380.719	507.263	194.994	368.448	1744.16	790.212	410.482	455.59	329.013	920.731	356.869	412.582	430.823	660.586		5.49625	4.33964	6.49406	4.13455	6.85297	4.86674	10.4131	6.14896	10.6582	6.11195	4.88421	5.80327	8.41683	4.88006	8.64113		0.286	0.143
568.602	2424.19	3393.12	1263.87	927.33	6171.41	1833.39	1679.92	5843.19	1333.21	1548.63	4987.98	5856.14	1798.26	8499.44		243.578	366.622	403.86	280.446	225.997	782.833	445.508	314.948	774.408	323.22	361.995	606.876	693.591	285.676	922.718		2.33437	6.61222	8.40173	4.50664	4.10328	7.88343	4.11529	5.33396	7.54537	4.12478	4.27805	8.21911	8.44322	6.29476	9.21131		0.12	0.227
693.417	2107.99	3398.67	2643.31	3451.37	513.129	5644.42	2823.59	1632.77	1446.01	995.747	6466.35	3280.32	1675.3	3970.04		148.334	452.557	450.19	532.223	476.494	95.711	922.115	439.409	308.769	285.499	301.39	671.038	550.93	382.433	536.149		4.6747	4.65795	7.54941	4.96654	7.24326	5.36123	6.12116	6.42589	5.28799	5.06484	3.30385	9.63633	5.95416	4.38063	7.40474		0.396	0.129
134.061	3591.9	2097.82	1051.22	6783.47	8457.84	847.818	3878.51	4287.17	1244.45	1129.81	3022.37	1530.14	3253.51	1722.45		62.182	561.576	326.117	285.482	954.95	717.295	186.409	613.732	871.978	344.688	374.83	497.334	371.128	644.018	494.984		2.15595	6.39611	6.43272	3.68226	7.10348	11.7913	4.54816	6.31955	4.9166	3.61038	3.01419	6.07715	4.12295	5.0519	3.47981		0.436	0.143
4145.71	3108.36	1870.38	1304.55	3565.09	4076.37	2181.95	2570.27	6141.83	3454.14	4647.74	985.577	1159.39	1357.25	7271.64		808.453	411.375	471.498	285.636	559.596	702.917	296.531	321.981	809.08	372.447	560.739	306.243	309.856	253.7	1006.11		5.12795	7.55602	3.96688	4.56717	6.37083	5.79922	7.35826	7.98266	7.59112	9.27418	8.2886	3.21828	3.74172	5.34982	7.22748		0.08	0.231
1597.63	1778.85	1803.81	2274.41	5235.76	1535.69	1753.88	1884.25	2349.3	1936.94	6228.73	6891.64	8880.36	1416.42	10341.2		469.285	323.864	290.198	268.481	745.361	367.515	261.392	375.69	506.37	404.576	1066.68	503.98	1628.03	380.156	932.76		3.4044	5.49257	6.21579	8.47139	7.02446	4.17857	6.70978	5.01543	4.63949	4.78759	5.83936	13.6744	5.45465	3.72589	11.0866		0.091	0.213
1483.91	3197.11	1437.68	1712.28	4142.94	3987.61	6347.08	3553.99	4461.91	1669.75	8347.82	2785.69	3316.38	1785.32	5573.23		297.834	610.329	293.191	315.278	746.681	705.29	1036.85	539.569	642.328	350.787	861.116	843.155	534.613	629.817	550.27		4.98235	5.23835	4.90358	5.43101	5.54847	5.65386	6.12152	6.58673	6.94646	4.76001	9.69419	3.30389	6.20333	2.83466	10.1282		0.21	0.108
7578.59	4738.35	1675.3	2162.54	2550.85	3241.49	1386.83	1315.64	3348.74	1254.62	1896.27	3815.64	2475.96	2971.52	2738.54		977.247	631.876	236.215	420.524	342.475	638.522	275.65	393.915	467.635	321.747	452.54	745.771	415.085	485.232	530.846		7.75504	7.49886	7.09225	5.14248	7.44828	5.07656	5.03114	3.33992	7.16102	3.89941	4.19027	5.11637	5.96495	6.12392	5.15881		0.1	0.149
238.536	2181.03	3186.02	1330.44	1452.48	551.036	1484.84	3013.13	3478.18	6661.43	1335.06	1913.83	5691.57	1645.71	4811.39		104.723	665.342	360.716	479.73	240.995	205.116	260.129	405.783	576.727	644.991	374.524	378.12	1128.38	292.974	689.319		2.27778	3.27806	8.83249	2.7733	6.027	2.68646	5.70808	7.42547	6.0309	10.3279	3.56468	5.06144	5.04401	5.61726	6.97992		0.273	0.062
2058.06	1075.26	2928.07	4159.58	3285.87	7634.98	1214.87	1250	2456.55	1018.86	554.734	2690.46	4329.7	1078.96	2216.16		310.692	214.168	478.12	610.706	514.255	713.836	325.787	368.891	475.577	242.548	187.552	470.234	622.301	423.614	711.349		6.62412	5.02063	6.12413	6.8111	6.38958	10.6957	3.72902	3.38853	5.1654	4.20066	2.95776	5.72153	6.95756	2.54703	3.11543		0.268	0.295
766.457	2097.82	1129.81	2181.03	4398.11	5928.25	916.235	1730.77	2048.82	723.928	4050.48	2017.38	10336.5	6367.42	3484.65		242.121	425.247	297.231	402.967	658.799	716.532	284.839	351.953	473.927	156.259	587.066	455.903	1095.68	636.752	618.375		3.16559	4.93318	3.80111	5.41242	6.67596	8.27354	3.21668	4.91761	4.32306	4.63287	6.89953	4.42502	9.43389	9.99984	5.63518		0.164	0.146
477.996	1030.88	1643.86	2372.41	10660.1	2471.34	699.889	1388.68	1738.17	826.553	617.604	8999.63	2162.54	3968.2	11842.6		170.944	222.521	282.973	459.822	1612.46	463.225	216.011	264.208	462.042	300.65	105.093	1326.75	363.999	548.637	1400.71		2.79621	4.63273	5.80925	5.15941	6.61109	5.33507	3.24006	5.25602	3.76192	2.74922	5.87674	6.78322	5.94105	7.23282	8.45475		0.206	0.262
1801.96	2289.2	1614.28	2354.84	6327.66	3143.49	3061.21	1655.88	4533.1	1188.06	4977.81	5537.17	3259.99	4157.73	4658.84		349.547	572.197	258.809	436.199	833.13	704.487	504.367	417.611	887.282	351.857	710.046	944.805	423.944	375.127	690.422		5.15513	4.00072	6.23732	5.39856	7.59505	4.4621	6.0694	3.96513	5.10897	3.37653	7.01055	5.86065	7.68966	11.0835	6.74781		0.185	0.088
802.515	2837.46	2802.33	2573.96	2307.69	3370.93	1421.04	541.79	4668.08	936.575	3706.55	3403.29	1576.37	3356.14	3688.98		234.042	429.946	551.727	641.605	388.862	445.701	240.568	259.139	648.677	191.711	679.68	452.307	337.559	451.784	492.691		3.42894	6.59958	5.0792	4.01176	5.93448	7.56321	5.90703	2.09073	7.19631	4.88535	5.45337	7.52429	4.6699	7.42864	7.48741		0.184	0.193
114.645	3246.12	5104.48	536.243	3954.33	2642.38	491.864	3035.32	2267.01	1773.3	1351.7	3328.4	3270.16	5330.99	3549.37		58.102	465.422	902.884	127.976	693.511	548.034	194.391	655.67	486.569	365.801	369.004	628.77	536.922	470.491	879.75		1.97317	6.97457	5.65352	4.19018	5.7019	4.82157	2.53028	4.62934	4.65918	4.84772	3.66311	5.29351	6.09056	11.3307	4.03452		0.427	0.188
2143.12	3788.83	468.75	274.593	1522.74	3890.53	2771.82	1664.2	1946.19	1063.24	5161.8	1524.59	3690.83	2928.07	3370.01		465.728	682.246	176.15	201.64	282.876	642.988	568.591	336.255	466.292	243.095	638.289	378.643	481.233	339.675	469.325		4.60166	5.55347	2.66108	1.3618	5.38308	6.05071	4.87489	4.94922	4.17376	4.37376	8.08693	4.02647	7.66952	8.62021	7.18054		0.124	0.102
1530.14	6528.29	1885.17	7300.3	2626.66	2600.78	2560.1	3986.69	3730.58	1591.16	5821.93	2535.13	2214.31	1239.83	2993.71		232.273	1068.82	479.093	931.793	491.798	435.329	701.357	595.861	570.241	387.059	705.427	364.095	337.189	246.257	605.557		6.58768	6.10793	3.93487	7.83468	5.34094	5.97428	3.6502	6.69063	6.54212	4.1109	8.25306	6.96283	6.56698	5.0347	4.94373		0.356	0.072
2961.35	1867.6	5994.82	1545.86	457.655	4990.75	497.411	3392.2	5139.61	1950.81	2168.08	3348.74	1945.27	1220.41	2931.77		557.319	345.661	726.677	429.246	182.659	578.223	136.095	713.539	459.742	480.276	364.072	592.635	445.524	430.213	685.136		5.31357	5.40299	8.24964	3.60133	2.50552	8.63119	3.65488	4.75405	11.1793	4.06186	5.9551	5.6506	4.36624	2.83677	4.2791		0.12	0.196
1193.6	2228.18	4424	794.194	2083.03	8913.65	1632.77	1597.63	10740.6	1588.39	1357.25	2769.97	1629.07	11709.5	1978.55		369.011	390.068	977.931	188.002	347.971	958.596	549.724	385.209	760.481	507.932	412.196	722.381	293.714	1410.23	375.11		3.2346	5.71229	4.52384	4.22439	5.9862	9.29865	2.97016	4.14744	14.1234	3.12717	3.29273	3.8345	5.54644	8.30328	5.27459		0.11	0.184
115.57	2075.63	5030.51	1104.85	1395.15	7841.16	4328.77	1239.83	7994.64	1064.16	314.349	804.364	3280.32	1516.27	2216.16		70.904	309.372	805.99	289.208	289.442	717.505	561.592	298.22	1134.42	208.689	147.73	339.312	453.393	284.799	348.574		1.62995	6.70917	6.2414	3.82024	4.82015	10.9284	7.70804	4.15743	7.04732	5.09928	2.12786	2.37057	7.23506	5.32401	6.35779		0.289	0.273
1983.17	3161.06	361.501	777.552	2545.3	1071.56	1090.98	2049.74	5232.99	2636.83	2843.93	6005.92	2185.65	4256.66	4494.27		626.501	499.297	193.304	195.791	518.801	266.421	177.92	516.838	682.793	309.509	507.223	714.512	358.246	596.811	854.14		3.16547	6.33102	1.87012	3.97134	4.90613	4.02206	6.13183	3.96593	7.66409	8.51941	5.60687	8.40562	6.10098	7.13234	5.26175		0.063	0.159
2529.59	1371.12	3802.7	944.896	1125.18	2562.87	2775.52	1116.86	1270.34	1666.05	2959.5	500.185	5070.27	1637.39	4974.11		488.925	268.208	748.178	251.93	205.969	607.093	624.457	244.881	220.694	449.04	567.538	288.685	642.152	204.046	611.132		5.17377	5.11214	5.08261	3.75063	5.46289	4.22154	4.44469	4.56084	5.75611	3.71025	5.21464	1.73263	7.89574	8.02461	8.13918		0.133	0.24
1016.09	1642.94	3571.56	3192.49	2091.35	2647	1311.02	1289.76	664.756	896.82	3422.71	3518.86	1562.5	1019.79	2156.07		203.25	223.55	451.47	391.622	447.101	331.459	374.33	270.211	142.235	357.859	480.026	465.285	332.409	352.573	388.918		4.9992	7.3493	7.91096	8.15198	4.67757	7.98592	3.50231	4.77314	4.67365	2.50607	7.13025	7.56281	4.70053	2.89241	5.54375		0.309	0.413
1013.31	1470.97	2252.22	3017.75	3469.86	1448.78	1479.29	2260.54	5831.18	1820.45	1617.97	1955.44	8001.11	5992.97	12884.6		207.056	264.635	549.217	580.806	600.697	309.196	256.323	530.453	779.647	422.157	286.142	543.175	865.492	862.169	751.83		4.89391	5.55848	4.10078	5.1958	5.77639	4.68564	5.77119	4.26153	7.47925	4.31226	5.65444	3.60001	9.24458	6.95104	17.1377		0.297	0.264
1571.75	3330.25	2011.83	564.904	3532.73	7718.19	735.947	7897.56	1851.89	558.432	749.815	1838.02	1349.85	1398.85	2023.85		252.01	398.051	468.198	149.83	735.376	871.221	194.817	1348.41	339.248	104.2	232.313	422.061	326.72	665.485	769.178		6.23684	8.36639	4.29697	3.7703	4.80398	8.85906	3.77763	5.85692	5.4588	5.35923	3.22761	4.35486	4.13153	2.10201	2.63119		0.311	0.264
851.516	1869.45	5711.91	1525.52	1802.88	9459.14	1313.79	1031.81	3774.96	1611.5	4129.99	3437.5	1408.1	2451.92	2851.33		276.19	272.174	1292.82	301.953	303.563	926.661	284.992	259.582	439.698	437.929	663.682	847.164	268.634	560.079	475.52		3.08308	6.8686	4.41819	5.05217	5.93908	10.2078	4.60993	3.97487	8.58535	3.67982	6.22285	4.05766	5.2417	4.37782	5.99624		0.14	0.317
112.796	855.214	6860.21	2757.95	3856.32	3073.22	1674.37	1367.42	2453.77	1534.76	3145.34	1328.59	1469.12	1255.55	5851.52		70.437	246.821	977.047	604.02	696.191	625.93	262.382	320.541	428.007	345.018	512.719	417.538	285.362	341.228	696.021		1.60137	3.46492	7.02137	4.56599	5.53918	4.90985	6.38142	4.26597	5.73302	4.44836	6.13463	3.18195	5.14827	3.6795	8.4071		0.286	0.176
141.457	6850.96	10319.9	1723.37	1741.86	1687.32	807.138	966.161	2167.16	1098.37	1371.12	3884.06	319.896	3892.38	3081.55		86.988	662.026	1635.54	331.403	454.77	517.401	157.056	231.106	354.206	326.68	377.227	596.794	87.648	597.237	422.254		1.62617	10.3485	6.30978	5.20023	3.83021	3.26114	5.13917	4.1806	6.11836	3.36223	3.63473	6.50821	3.64978	6.51732	7.29785		0.235	0.196
113.72	1755.73	6169.56	1412.72	1611.5	2621.12	4479.48	2308.62	672.152	2833.76	1238.9	3628.88	1911.06	2736.69	3782.36		86.425	280.35	583.333	324.66	261.819	402.13	600.311	684.709	212.519	536.969	305.76	754.727	361.529	301.527	682.713		1.31582	6.26264	10.5764	4.35139	6.15502	6.51808	7.46192	3.37168	3.16279	5.27733	4.05189	4.80821	5.28604	9.07609	5.54019		0.191	0.281
906.99	967.086	1358.17	11103.9	1605.95	2844.86	772.004	2391.83	5340.24	1159.39	1799.19	2308.62	5306.95	3596.52	3114.83		230.969	216.888	351.39	1827.12	277.533	555.283	223.22	438.475	815.019	294.068	420.724	556.596	732.56	489.778	441.581		3.92689	4.45892	3.86514	6.0773	5.78653	5.12326	3.45849	5.45488	6.55229	3.9426	4.2764	4.14774	7.24439	7.34317	7.05381		0.214	0.258
1201.92	1508.88	4557.14	1145.53	2256.84	5483.54	1411.8	1757.58	3658.47	885.725	1528.29	7243.9	7050.67	980.954	17808.8		249.057	263.178	1007.04	315.568	409.299	932.793	261.272	283.962	396.168	309.726	282.329	1044.71	813.216	160.009	1188.15		4.8259	5.73329	4.5253	3.63004	5.51392	5.87863	5.40355	6.18949	9.23464	2.85971	5.41316	6.93385	8.6701	6.13062	14.9887		0.243	0.274
553.809	1661.43	2607.25	1654.03	3280.32	1204.7	1306.4	11674.4	508.506	9880.73	1811.21	2144.05	2741.31	8205.44	14139.2		185.379	298.26	566.588	291.735	502.967	225.627	229.98	1757.42	123.004	701.834	497.574	373.301	631.603	891.715	1552.51		2.98744	5.5704	4.60167	5.66964	6.52195	5.33933	5.68049	6.64289	4.13406	14.0784	3.64007	5.74348	4.34024	9.20186	9.10734		0.203	0.235
1273.11	3074.15	1648.48	1056.77	5995.75	2975.22	1079.88	1708.58	2283.65	5800.67	2992.79	5033.28	1134.43	2143.12	9559.91		317.241	452.967	370.411	184.252	740.702	667.835	258.479	357.159	360.402	467.86	426.784	651.324	158.842	353.893	907.937		4.01308	6.7867	4.45042	5.73545	8.09468	4.45503	4.17783	4.78381	6.33641	12.3983	7.01242	7.72777	7.14188	6.05584	10.5293		0.159	0.188
1111.32	1605.03	1322.12	921.783	3643.68	1617.97	671.228	5898.67	4255.73	4225.22	1157.54	5250.56	356.879	2496.3	5916.23		242.821	365.318	235.089	246.314	609.443	328.45	282.796	827.401	719.485	419.58	192.604	943.945	254.513	444.824	669.701		4.57669	4.39351	5.62389	3.74231	5.9787	4.92609	2.37354	7.12915	5.91497	10.0701	6.00997	5.56235	1.4022	5.61189	8.83414		0.237	0.151
1519.97	2365.94	6400.7	4094.86	2258.69	6165.86	675.851	3301.59	1621.67	2955.81	1316.57	1513.5	300.481	7116.31	5997.6		319.414	405.356	582.698	494.848	362.792	1010.8	204.883	446.674	327.323	499.367	516.258	399.677	95.204	868.695	1199.88		4.75862	5.83669	10.9846	8.27498	6.22586	6.09999	3.29872	7.3915	4.95435	5.91911	2.55021	3.78681	3.15618	8.19195	4.99849		0.187	0.181
2276.26	2707.1	4152.18	12635	1693.79	2890.16	1262.94	323.595	3004.81	1283.28	4631.1	4637.57	1333.21	5515.9	3253.51		517.811	422.431	337.639	2177.83	344.068	422.937	307.819	207.756	731.53	450.633	485.056	795.651	427.613	618.865	397.237		4.39592	6.40839	12.2977	5.80165	4.92283	6.83355	4.10288	1.55757	4.10757	2.84774	9.54756	5.82865	3.1178	8.91293	8.19036		0.107	0.191
877.404	1597.63	3096.34	1904.59	539.941	562.13	1182.51	313.425	2366.86	5696.19	1669.75	641.642	2659.95	5570.45	3956.18		188.525	270.678	373.227	281.653	115.368	226.02	380.55	157.193	419.204	465.103	479.56	295.018	386.489	794.162	518.335		4.65405	5.90234	8.29613	6.76217	4.68016	2.48708	3.10736	1.99389	5.64609	12.2472	3.48184	2.17492	6.88234	7.01425	7.63247		0.31	0.274
1232.43	3116.68	3553.99	1677.14	1350.78	4261.28	2254.07	6703.96	2168.08	3217.46	3704.7	2373.34	1891.64	825.629	5791.42		263.235	469.518	573.387	427.887	285.362	527.017	327.3	1193.14	363.999	346.281	345.911	604.487	406.033	315.318	617.015		4.68187	6.63804	6.19825	3.9196	4.73356	8.08566	6.88686	5.61876	5.95629	9.29146	10.71	3.9262	4.65884	2.6184	9.38619		0.224	0.178
1204.7	1756.66	5933.8	563.979	1524.59	3856.32	835.799	2721.89	3659.39	1538.46	624.075	4935.28	2359.47	4371.3	1691.01		314.578	359.452	966.505	209.912	348.904	721.391	238.138	727.314	573.581	397.504	141.108	667.642	588.072	559.886	575.721		3.82957	4.88704	6.13944	2.68674	4.36966	5.34568	3.50973	3.74239	6.37991	3.87031	4.42268	7.39211	4.01221	7.80749	2.93721		0.153	0.171
2157.91	1577.29	1471.89	1733.54	9153.11	7468.56	904.216	1916.61	2205.07	1437.68	1855.58	7503.7	1000.37	3122.23	3672.34		612.782	304.923	302.147	403.763	1309.73	1196.99	199.25	391.678	432.513	488.805	317.435	846.511	295.814	653.867	461.029		3.5215	5.17276	4.87145	4.29347	6.98854	6.23944	4.5381	4.89332	5.09827	2.94122	5.84556	8.86427	3.38175	4.77502	7.96552		0.072	0.213
3113.91	1063.24	4335.24	244.083	3259.06	6638.31	920.858	9333.4	4159.58	311.575	778.476	5949.52	1176.96	2283.65	4655.14		598.831	268.908	649.087	85.725	533.469	825.044	150.353	1536.44	830.41	72.924	284.196	539.199	527.5	353.177	671.061		5.19997	3.95392	6.67899	2.84728	6.10919	8.04601	6.12464	6.07469	5.00907	4.2726	2.73922	11.034	2.2312	6.46603	6.93699		0.109	0.185
2790.31	1983.17	510.355	1410.87	8525.33	1703.03	1200.07	2024.78	1880.55	2099.67	1039.2	3537.35	2006.29	2093.2	2805.1		344.358	468.915	224.404	314.248	1382.47	354.303	319.261	320.018	434.766	464.778	321.417	836.663	361.279	444.301	619.018		8.10294	4.22928	2.27427	4.48968	6.16675	4.80671	3.75891	6.32708	4.32542	4.51757	3.23319	4.22793	5.55329	4.71121	4.53154		0.296	0.113
3265.53	3667.71	4278.85	2232.8	2222.63	1508.88	6866.68	1360.02	3015.9	1472.82	827.478	2855.03	1591.16	2957.66	958.765		432.649	488.749	828.27	490.808	616.355	278.796	968.469	302.243	493.761	357.449	213.855	589.102	295.154	466.388	147.77		7.54777	7.50429	5.166	4.54924	3.60609	5.41211	7.09024	4.49976	6.10802	4.12036	3.86934	4.84641	5.39095	6.34162	6.48822		0.219	0.193
2779.22	4451.74	4080.07	1188.98	2075.63	2609.1	1883.32	4790.13	2046.97	1827.85	1093.75	945.821	5298.63	3310.84	2974.3		380.453	514.819	630.83	267.741	369.784	528.497	267.258	1044.04	374.33	465.825	431.943	243.754	605.147	602.057	512.212		7.30502	8.64719	6.46778	4.44078	5.61308	4.93683	7.04683	4.58807	5.46835	3.92389	2.53216	3.88023	8.75594	5.49921	5.80677		0.241	0.211
438.24	4648.67	3743.53	1562.5	2177.33	5254.25	1608.73	1588.39	6980.4	2305.84	895.895	2326.18	11381.3	428.07	2421.41		144.021	755.37	552.483	413.339	395.468	803.697	315.045	447.197	654.413	804.35	224.87	313.588	1721.73	300.924	345.331		3.04289	6.15416	6.77582	3.78019	5.5057	6.5376	5.10634	3.55188	10.6667	2.86672	3.98406	7.41796	6.61037	1.42252	7.01186		0.266	0.102
5403.11	1867.6	5391.09	2120.93	6303.62	3624.26	1796.41	1760.36	2131.1	1025.33	3461.54	6891.64	3217.46	3249.82	9785.5		715.582	260.789	785.439	589.642	556.174	716.708	297.931	299.757	388.065	287.712	499.707	609.186	467.265	399.217	645.048		7.55065	7.16136	6.86379	3.59698	11.3339	5.05682	6.02963	5.87261	5.49161	3.56375	6.92714	11.3129	6.88572	8.14047	15.1702		0.133	0.345
1135.36	2056.21	6634.61	4420.3	3344.12	1778.85	798.817	867.234	7186.57	976.331	654.586	2414.94	4475.78	3689.9	17709.9		281.379	285.732	822.791	828.367	406.655	314.908	237.479	217.371	1176.12	219.761	198.647	785.263	672.358	536.809	2403.27		4.03497	7.1963	8.06355	5.33617	8.22348	5.64878	3.36374	3.98965	6.1104	4.44269	3.29522	3.07533	6.65684	6.87377	7.36908		0.18	0.316
1020.71	1015.16	5083.21	531.62	1474.67	3804.55	659.209	573.225	3603	2877.22	1944.34	4331.55	7148.67	3712.09	6302.7		308.342	258.206	616.645	144.954	249.304	666.242	167.178	183.689	580.903	683.234	349.234	780.927	679.1	460.932	924.021		3.31032	3.9316	8.24333	3.66751	5.91514	5.71046	3.94316	3.12063	6.20241	4.21118	5.56745	5.54667	10.5267	8.05345	6.82095		0.135	0.191
2971.52	2285.5	4136.46	548.262	3982.06	6471.89	2491.68	2405.7	3885.91	2143.12	777.552	1747.41	1079.88	2197.67	10956.9		431.636	340.415	777.804	156.493	337.02	759	388.202	621.151	506.796	386.362	295.348	443.014	167.468	274.854	1003.01		6.88433	6.71387	5.31813	3.50343	11.8155	8.52687	6.41851	3.87296	7.6676	5.54692	2.63266	3.94437	6.44829	7.99577	10.924		0.2	0.248
919.933	4199.33	2124.63	2022.93	4031.07	5721.15	2296.6	1943.42	2544.38	2041.42	1126.11	3064.9	2426.96	2513.87	11557.9		256.749	659.459	379.4	265.391	367.293	461.029	408.776	447.567	584.653	393.994	348.374	624.184	548.074	292.435	1049.17		3.58301	6.36785	5.59997	7.62245	10.9751	12.4095	5.61823	4.34218	4.35195	5.18135	3.23247	4.91026	4.42816	8.59633	11.0162		0.175	0.121
150.703	3481.88	2696.93	2210.61	6155.69	2050.67	1397.93	7701.55	2837.46	5187.69	4590.42	539.016	336.538	1964.68	4053.25		83.006	572.341	550.954	400.867	411.81	461.689	228.66	1347.52	518.431	526.911	493.431	264.845	78.926	416.911	605.033		1.81557	6.08357	4.89502	5.51458	14.9479	4.44166	6.11357	5.71537	5.47317	9.84547	9.30307	2.03521	4.26397	4.71247	6.69923		0.275	0.134
1789.94	1188.98	6446.93	1021.63	3737.98	1969.31	1838.02	1964.68	4004.25	4162.35	3365.39	1405.33	8419.01	321.746	10238.5		439.255	244.431	742.232	274.757	315.987	281.323	359.919	410.482	813.449	458.387	451.213	341.735	1152.5	133.456	1520.71		4.07495	4.86427	8.68587	3.71832	11.8295	7.00016	5.10675	4.78628	4.92256	9.08043	7.45853	4.11232	7.30497	2.41088	6.73273		0.117	0.25
215.422	1804.73	1858.36	649.038	2386.28	10227.4	2530.51	2245.75	1196.38	1270.34	3787.91	3911.8	6599.48	10748.9	8052.89		87.882	437.775	516.445	138.058	344.684	1237.75	517.828	437.855	248.494	232.314	1010.94	426.977	875.711	854.927	1324.01		2.45126	4.12251	3.59837	4.7012	6.92309	8.26296	4.88678	5.12897	4.81451	5.4682	3.74692	9.16161	7.53614	12.5729	6.08219		0.351	0.118
182.138	1155.69	6372.97	1862.06	1925.85	4613.54	5293.08	2157.91	7287.35	3753.7	1090.05	1462.65	1601.33	9898.3	1747.41		106.356	272.464	764.945	384.332	306.546	709.579	1088.01	503.94	1094.52	823.564	317.515	382.216	406.483	1128.74	363.492		1.71253	4.24164	8.33127	4.84492	6.28242	6.50179	4.86494	4.28209	6.65802	4.55787	3.43307	3.82676	3.93948	8.7693	4.80729		0.202	0.196
184.911	497.411	10178.4	1628.14	2196.75	1985.02	1606.88	1922.15	4879.81	4083.76	737.796	5178.44	4677.33	446.561	3489.28		124.034	210.186	848.668	404.93	384.046	451.977	312.985	718.591	578.497	476.317	201.077	589.899	806.57	152.26	668.568		1.49081	2.36653	11.9934	4.0208	5.72001	4.39187	5.13404	2.67489	8.43532	8.57363	3.66922	8.77852	5.79904	2.93288	5.21903		0.151	0.141
119.268	1286.98	320.821	711.908	3186.95	3667.71	802.515	5489.09	1788.09	317.123	2049.74	9331.55	8262.76	4609.84	17216.2		102.936	233.399	163.195	170.147	402.332	581.466	143.128	852.24	401.237	149.13	342.651	989.929	1967.14	696.665	1863.68		1.15866	5.51409	1.96588	4.18408	7.92118	6.3077	5.60697	6.44078	4.45645	2.12649	5.98201	9.42648	4.20039	6.61701	9.23774		0.141	0.297
2076.55	1773.3	8796.23	1220.41	1290.68	8161.98	1744.64	1483.91	1707.65	1323.04	4569.16	4237.24	7203.22	1840.79	4563.61		369.688	345.074	838.006	241.518	256.146	731.803	300.924	345.001	357.803	212.205	522.841	789.802	1148.13	375.497	790.412		5.61704	5.13889	10.4966	5.0531	5.03885	11.1533	5.7976	4.30118	4.77261	6.23473	8.73909	5.36494	6.27388	4.90228	5.77371		0.191	0.187
1906.43	1877.77	3608.54	1850.04	1366.49	4384.25	920.858	2768.12	2268.86	1066.94	320.821	2433.43	20783.1	1116.86	2948.41		317.258	252.807	420.371	266.735	332.586	568.318	215.585	354.286	363.629	499.41	82.966	590.655	1517.52	323.164	523.421		6.0091	7.4277	8.58419	6.93586	4.10869	7.71442	4.27144	7.81324	6.23949	2.1364	3.8669	4.11989	13.6955	3.45603	5.63296		0.238	0.369
4368.53	3672.34	1585.61	2526.81	1679.92	4092.09	822.855	1502.4	1608.73	1098.37	629.623	2456.55	8340.42	2951.18	4188.24		763.022	613.852	414.152	454.52	289.055	596.658	225.57	401.293	459.436	453.94	127.043	736.743	1302.58	540.052	545.998		5.7253	5.98245	3.82858	5.5593	5.81176	6.85834	3.64789	3.74391	3.50153	2.41964	4.95598	3.33433	6.40298	5.46463	7.6708		0.094	0.122
122.966	1198.22	3741.68	823.78	1256.47	2519.42	3326.55	2728.36	4338.94	2261.46	1170.49	3831.36	2244.82	696.191	3056.58		54.819	232.932	439.562	264.055	244.044	642.505	501.88	424.877	745.481	493.761	623.124	571.834	841.442	287.712	534.436		2.24313	5.1441	8.51229	3.11973	5.14855	3.92124	6.62818	6.42154	5.82033	4.58008	1.87842	6.70013	2.66783	2.41975	5.71927		0.514	0.278
563.055	2482.43	1639.24	935.651	566.753	5120.19	1158.47	1526.44	3485.58	1138.13	1769.6	3263.68	811.76	731.324	4090.24		179.57	365.882	264.442	230.076	232.506	617.248	362.559	376.334	380.453	313.685	323.727	689.415	283.326	154.006	528.763		3.13557	6.78479	6.19886	4.0667	2.43758	8.29519	3.19526	4.05608	9.16165	3.62825	5.46634	4.73399	2.86511	4.74867	7.73548		0.219	0.233
453.957	2794.93	5155.32	901.442	2301.22	1564.35	671.228	1849.11	1101.15	1629.07	1843.57	10283.8	1952.66	851.516	6689.16		145.324	431.056	1004.97	158.416	503.433	320.444	193.674	373.011	234.389	472.979	467.845	1773.35	395.058	274.29	992.062		3.12376	6.48392	5.12985	5.69035	4.57106	4.88182	3.46576	4.95726	4.69794	3.44427	3.94055	5.7991	4.94272	3.10444	6.74269		0.27	0.189
868.158	3189.72	9089.31	208.95	2065.46	9669.01	801.59	3109.28	2713.57	1311.94	2822.67	1071.56	1364.64	597.263	12984.5		221.821	464.232	910.769	104.803	464.972	1177.78	164.748	638.836	375.77	282.372	430.583	232.119	361.159	151.19	1796.77		3.91378	6.87096	9.97982	1.99374	4.44211	8.20954	4.86555	4.86711	7.22136	4.64616	6.55546	4.61643	3.77852	3.95041	7.22655		0.222	0.186
733.173	2362.24	5204.33	256.102	1637.39	1528.29	3042.71	1090.05	9951	4525.7	1433.99	3737.98	3725.04	4606.14	2737.61		325.94	432.063	743.808	151.753	326.39	413.089	412.172	337.655	1090.21	419.449	379.166	633.663	580.573	603.73	470.178		2.24941	5.46735	6.99687	1.68762	5.01666	3.69967	7.38215	3.2283	9.12761	10.7896	3.78195	5.899	6.41614	7.62947	5.8225		0.087	0.159
4383.32	3322.86	2659.95	866.309	1335.06	3746.3	756.287	2083.95	3290.5	3923.82	827.478	2402	6343.38	5911.61	3713.02		764.029	354.906	435.386	197.81	395.468	644.621	156.823	462.872	421.634	407.324	231.823	528.063	892.239	545.861	708.879		5.73711	9.36263	6.1094	4.3795	3.3759	5.81164	4.82255	4.50222	7.80415	9.63316	3.56944	4.54869	7.10951	10.8299	5.23787		0.094	0.332
979.105	2552.7	2173.63	1266.64	3490.2	6149.22	2357.62	1076.18	1349.85	2617.42	1825.07	4473.93	4387.02	936.575	803.439		191.711	300.594	359.509	254.263	413.942	875.551	306.419	295.034	358.246	372.649	381.403	675.527	812.862	176.093	335.089		5.10719	8.49219	6.04611	4.98162	8.43162	7.02326	7.6941	3.64766	3.76795	7.02382	4.78516	6.62287	5.397	5.31864	2.39769		0.335	0.355
1321.19	721.154	5593.56	2296.6	1626.29	3447.67	1347.08	1590.24	5388.31	4333.4	1131.66	2043.27	3203.59	2041.42	7402		362.929	172.207	860.479	341.445	413.355	687.612	212.672	402.42	785.069	485.456	426.857	379.923	473.034	363.999	903.874		3.64036	4.18772	6.50052	6.72611	3.93438	5.01398	6.33406	3.95168	6.86349	8.92644	2.65114	5.37811	6.77242	5.60831	8.18919		0.126	0.306
1023.48	1986.87	4599.67	1530.14	3159.21	1359.1	756.287	1683.62	3769.42	1739.09	2482.43	3303.44	6376.66	1242.6	2494.45		220.637	363.412	693.222	277.71	685.706	245.034	217.371	338.492	534.556	273.734	619.018	884.626	2095.03	464.272	393.698		4.63877	5.46727	6.6352	5.50985	4.60724	5.54657	3.47925	4.97388	7.05149	6.35321	4.01028	3.73428	3.04371	2.67646	6.33596		0.264	0.189
11377.6	1520.89	4410.13	7205.99	2561.95	4336.17	6291.6	2000.74	3500.37	975.407	773.854	9421.23	2830.07	2958.58	1341.53		2039.72	240.585	769.678	1386.21	430.743	650.311	857.293	439.175	612.219	219.671	250.594	1122.69	328.836	314.152	272.367		5.57801	6.32165	5.72984	5.19834	5.94773	6.66784	7.33892	4.55568	5.71751	4.44031	3.08808	8.39164	8.60632	9.41767	4.92545		0.034	0.33
2230.03	1531.07	6397.93	405.88	2612.8	3432.88	1243.53	1861.13	3789.76	2710.8	1022.56	3233.17	2909.58	2155.14	2970.6		565.792	255.35	1338.13	100.547	627.837	619.098	209.816	374.507	665.792	645.861	343.304	481.523	504.133	299.097	493.568		3.94143	5.99595	4.78124	4.03672	4.16158	5.54497	5.92675	4.96955	5.6921	4.19719	2.97858	6.71447	5.77145	7.20549	6.01862		0.088	0.295
2983.54	1504.25	2588.76	5236.69	4987.06	8975.59	560.281	2144.05	1815.83	2107.06	1805.66	852.441	2148.67	2331.73	2851.33		402.227	259.236	394.864	700.994	726.324	991.989	169.664	485.562	403.763	451.993	467.008	197.754	420.058	411.786	710.159		7.41756	5.80264	6.55607	7.47037	6.86616	9.04808	3.3023	4.4156	4.49726	4.66172	3.86644	4.31061	5.11517	5.66248	4.01506		0.232	0.281
4703.22	1018.86	2300.3	833.025	5895.9	2285.5	579.697	2169.93	8390.35	6111.32	1402.55	4571.01	821.93	4266.83	1113.17		456.909	250.747	327.34	154.103	894.492	513.652	167.275	481.813	1212.01	785.239	430.293	1291.07	193.498	559.902	426.237		10.2936	4.0633	7.02724	5.40564	6.59133	4.44952	3.46553	4.50368	6.9227	7.78275	3.25953	3.54047	4.24774	7.62067	2.61161		0.283	0.204
1637.39	1477.44	5501.11	1319.34	1715.98	2612.8	1003.14	1815.83	5882.95	1098.37	1934.17	2669.19	5619.45	3720.41	3383.88		303.466	218.168	777.924	270.791	477.517	662.219	260.709	325.264	900.461	317.765	290.858	481.096	889.912	832.27	492.578		5.39563	6.77203	7.07152	4.87218	3.59354	3.94552	3.84775	5.58263	6.53327	3.45656	6.64988	5.54815	6.31462	4.4702	6.86973		0.223	0.39
1149.22	1279.59	2550.85	573.225	1766.83	1859.28	992.973	2516.64	11050.3	1176.96	2171.78	10680.5	6652.18	827.478	2736.69		328.023	202.3	543.415	128.87	396.321	389.932	192.178	492.618	651.75	314.925	466.228	964.639	773.218	380.003	380.686		3.50348	6.32519	4.69411	4.44809	4.45807	4.76822	5.16694	5.10871	16.9548	3.73727	4.6582	11.072	8.60324	2.17756	7.18883		0.134	0.393
4731.88	1292.53	1054.92	877.404	2505.55	2004.44	894.046	3798.08	5136.83	3981.14	1841.72	4246.49	2736.69	1519.05	3632.58		579.583	230.719	258.496	198.607	500.714	464.425	274.307	657.713	673.178	367.386	788.779	711.406	625.657	308.809	530.573		8.16428	5.60218	4.08099	4.41779	5.00395	4.31596	3.25929	5.77467	7.63072	10.8364	2.33489	5.96915	4.3741	4.91905	6.84652		0.177	0.305
1963.76	1319.34	1115.94	846.893	1366.49	4021.82	1023.48	4414.76	3091.72	4563.61	1498.71	2061.76	2453.77	739.645	3695.45		370.991	207.522	209.622	266.228	332.586	532.883	376.334	582.85	490.398	568.233	281.806	430.606	395.838	149.227	500.56		5.29327	6.3576	5.32358	3.18108	4.10869	7.54729	2.71962	7.57443	6.3045	8.03123	5.31822	4.78804	6.19893	4.95651	7.38263		0.179	0.385
3218.38	3032.54	1189.9	1135.36	1679.92	2012.76	759.985	430.843	4212.28	3284.02	379.068	946.746	302.33	1289.76	11300.9		534.226	343.311	260.596	228.893	289.055	324.74	200.917	202.357	533.429	471.703	82.112	379.843	119.158	254.69	949.078		6.02438	8.83323	4.56609	4.9602	5.81176	6.19806	3.78258	2.12912	7.8966	6.96206	4.61648	2.49247	2.53722	5.06402	11.9072		0.142	0.323
1856.51	971.709	1167.71	704.512	1256.47	1899.04	1066.94	1658.65	1862.06	682.322	3822.11	2164.39	10068.4	2166.24	3785.13		251.64	168.031	167.604	155.269	244.044	476.817	232.603	335.112	430.646	126.947	651.1	359.026	1463.86	293.328	577.194		7.37764	5.78292	6.9671	4.53736	5.14855	3.98274	4.58695	4.94955	4.32387	5.37486	5.87024	6.02849	6.87801	7.38503	6.55782		0.368	0.432
1384.06	5612.06	3275.7	971.709	566.753	1862.98	4129.07	926.405	1174.19	2206.92	6080.81	1634.62	1325.81	4109.65	1965.61		250.184	965.572	474.024	263.082	232.506	397.624	592.401	155.269	305.06	350.537	1499.23	405.163	273.96	402.927	482.923		5.53217	5.81216	6.91042	3.69356	2.43758	4.68528	6.97006	5.96645	3.84903	6.29581	4.05594	4.03446	4.83944	10.1995	4.07023		0.278	0.076
865.385	3763.87	2052.51	521.45	2301.22	1526.44	1324.89	854.29	4440.64	3369.08	1764.98	2411.24	1245.38	421.598	2619.27		290.415	686.189	383.873	117.194	503.433	253.563	283.632	167.838	657.633	478.297	390.721	450.19	319.318	182.233	396.868		2.97982	5.48518	5.34686	4.44946	4.57106	6.01997	4.67115	5.08997	6.75246	7.04391	4.51723	5.35606	3.90012	2.31351	6.59985		0.129	0.1
250.555	1574.52	12239.3	1417.35	2065.46	2930.84	3776.81	960.614	1538.46	1518.12	2529.59	1213.94	1695.64	2301.22	1867.6		91.495	330.236	1202.93	408.736	464.972	736.422	497.977	182.892	486.962	263.452	730.177	284.816	336.705	322.311	497.511		2.73846	4.76786	10.1745	3.46763	4.44211	3.97984	7.58431	5.25236	3.15931	5.76242	3.46435	4.2622	5.03597	7.13975	3.75389		0.376	0.181
756.287	2980.77	601.886	858.913	1637.39	1032.73	711.908	2859.65	3443.05	1915.68	626.849	3204.51	4111.5	1801.04	2358.54		196.411	511.246	216.888	212.439	326.39	232.876	131.356	496.071	547.688	383.503	231.186	395.991	479.986	457.683	339.892		3.85053	5.8304	2.7751	4.0431	5.01666	4.43467	5.41968	5.7646	6.28651	4.99522	2.71145	8.09239	8.56588	3.93512	6.9391		0.246	0.143
113.72	3106.51	4721.71	996.672	13110.2	7294.75	1921.23	1955.44	2958.58	4505.36	1217.64	1573.6	5007.4	625.925	3623.34		77.566	791.982	618.938	276.697	1574.88	1040.09	507.859	509.653	554.407	563.829	520.894	479.44	710.086	264.458	457.649		1.46611	3.92245	7.62873	3.60203	8.32459	7.01358	3.78299	3.8368	5.33648	7.99065	2.3376	3.28215	7.05182	2.36682	7.91728		0.238	0.062
3999.63	1513.5	9247.41	955.067	7488.9	2580.44	1077.11	5872.78	1586.54	3220.23	2031.25	890.348	15565.8	2288.28	3799		553.4	390.358	1284.62	218.811	1206.16	505.453	199.734	631.49	332.626	711.712	367.845	258.279	1766.86	362.542	463.805		7.22738	3.87721	7.19857	4.3648	6.20886	5.10519	5.39271	9.29988	4.76974	4.52462	5.52203	3.44723	8.80987	6.31176	8.19094		0.164	0.125
1632.77	7590.61	4083.76	2812.5	3159.21	1948.96	3718.57	1456.18	6378.51	670.303	894.97	1827.85	17009.1	1571.75	4424.93		382.996	1283.43	579.077	857.35	685.706	454.906	593.938	340.375	1007.29	126.287	317.418	393.988	1614.39	384.026	678.754		4.26314	5.9143	7.0522	3.28046	4.60724	4.28432	6.26086	4.27815	6.33233	5.30778	2.81953	4.63935	10.5359	4.09281	6.51919		0.14	0.058
7654.4	1383.14	2991.86	2331.73	2561.95	3102.81	554.734	1720.6	2892.01	2009.06	845.969	8673.26	5923.63	2813.43	4325.07		1170.18	348.397	384.686	294.454	430.743	666.685	136.988	364.852	596.094	392.708	395.781	1308.55	737.106	547.897	685.103		6.54121	3.97	7.77742	7.91883	5.94773	4.65409	4.04951	4.71588	4.8516	5.11592	2.13747	6.62813	8.03634	5.13495	6.31303		0.07	0.143
966.161	6287.91	3833.21	648.114	2612.8	4597.82	2597.08	1350.78	1990.57	1348.93	526.997	2578.59	1122.41	2473.19	4297.34		181.999	926.717	495.724	227.767	627.837	777.844	411.962	301.213	440.688	316.735	158.029	532.666	144.391	352.847	597.181		5.30861	6.78514	7.73255	2.84551	4.16158	5.91098	6.30417	4.48446	4.51696	4.25885	3.33481	4.84091	7.77341	7.00924	7.19604		0.367	0.092
1833.39	3211.91	3370.01	2260.54	4987.06	2463.02	733.173	3593.75	4091.16	1056.77	1013.31	2515.72	10215.4	8183.25	4353.73		411.182	684.289	572.084	438.999	726.324	488.925	175.297	584.073	580.573	335.942	157.852	504.037	1342.78	726.79	677.49		4.45884	4.69379	5.89076	5.14931	6.86616	5.03762	4.18246	6.15291	7.04676	3.14569	6.41939	4.99114	7.60769	11.2594	6.42627		0.136	0.086
1131.66	1638.31	4855.77	934.726	5895.9	1285.13	1083.58	3417.16	3234.1	989.275	768.306	2541.61	3997.78	2298.45	3848.93		279.456	334.822	851.444	162.495	894.492	180.639	181.396	482.633	580.613	181.669	259.542	553.587	772.654	415.455	638.209		4.0495	4.89309	5.70298	5.75234	6.59133	7.11437	5.97356	7.08025	5.57014	5.44548	2.96024	4.59116	5.17409	5.53236	6.03083		0.182	0.184
1198.22	1514.42	2090.42	2365.01	1715.98	1299.93	973.558	1822.3	6114.09	4294.56	870.007	3118.53	3479.11	560.281	4741.12		247.231	310.346	409.122	428.49	477.517	380.316	187.399	333.946	584.073	585.775	131.783	517.868	545.394	246.314	618.085		4.84658	4.87979	5.10953	5.51942	3.59354	3.41802	5.19511	5.45687	10.468	7.33142	6.60182	6.02186	6.37907	2.27466	7.67067		0.246	0.198
117.419	2553.62	3032.54	906.99	10637	3340.42	1330.44	1753.88	4573.78	1601.33	411.428	9875.18	6148.3	2781.07	2629.44		48.02	536.399	518.705	271.201	1325.43	601.904	234.639	478.36	672.051	317.863	262.439	1250.51	734.716	315.335	625.077		2.44521	4.76068	5.84638	3.34435	8.02535	5.54976	5.67014	3.66645	6.8057	5.0378	1.56771	7.89694	8.36827	8.8194	4.20658		0.64	0.112
822.855	1493.16	3107.43	2781.07	1766.83	12107.1	4506.29	3426.41	3170.3	2418.64	1838.02	1184.36	2834.69	1049.37	3498.52		188.758	311.625	574.087	695.724	396.321	1510.64	776.251	689.899	563.772	660.711	495.298	296.007	401.623	327.983	595.145		4.35931	4.79152	5.41283	3.99737	4.45807	8.01454	5.80519	4.96653	5.62338	3.66066	3.71093	4.00111	7.05808	3.19947	5.87843		0.29	0.193
685.096	3324.7	6512.57	8308.99	2505.55	7237.43	1098.37	3171.23	1195.45	1565.27	2494.45	1519.05	5585.24	1711.35	5403.11		151.247	469.751	778.31	1540.22	500.714	1103.63	250.297	436.456	275.224	281.539	376.293	342.298	715.815	377.653	1011.9		4.52965	7.07759	8.36758	5.39469	5.00395	6.55783	4.38828	7.26586	4.34356	5.55971	6.62902	4.43779	7.80264	4.53155	5.33959		0.376	0.189
1615.2	3589.13	5473.37	2367.79	1894.42	2718.2	543.639	2994.64	1966.53	1473.74	1221.34	3974.67	1948.04	3338.57	12071		302.983	421.361	1041.05	465.905	399.467	643.745	136.699	552.21	433.269	254.086	391.695	748.121	387.035	386.609	1273.95		5.33099	8.51794	5.25757	5.08213	4.74236	4.22247	3.97691	5.42301	4.53882	5.80017	3.11809	5.31287	5.03324	8.63553	9.47522		0.221	0.254
1014.24	1661.43	7153.29	4208.58	1882.4	2794.93	1571.75	1189.9	1824.15	1881.47	5506.66	3060.28	6121.49	3210.98	654.586		314.402	334.372	949.374	711.406	330.333	565.035	316.638	236.352	330.606	448.944	853.537	319.301	487.212	413.282	363.435		3.22593	4.9688	7.53475	5.91586	5.69848	4.94648	4.96386	5.03446	5.51759	4.19088	6.45157	9.58431	12.5643	7.76947	1.80111		0.129	0.187
1511.65	3853.55	2794.01	1385.91	1974.85	1695.64	407.729	5465.05	2116.31	606.509	2063.61	3089.87	2706.18	2597.08	5507.58		238.138	787.822	399.427	330.276	367.708	391.445	197.191	922.428	278.99	103.5	250.514	391.308	716.242	303.273	720.441		6.34779	4.8914	6.99504	4.19622	5.37071	4.33173	2.06769	5.92464	7.58561	5.85999	8.2375	7.89625	3.7783	8.5635	7.64474		0.335	0.078
1174.19	3576.18	539.016	1506.1	1299.93	1138.13	731.324	5115.57	5907.91	2405.7	1677.14	4622.78	1773.3	1509.8	3751.85		249.057	573.017	140.078	297.641	341.252	276.68	256.066	741.049	1013.68	401.607	326.1	529.35	345.404	322.134	579.487		4.71453	6.24097	3.84797	5.06013	3.80928	4.11352	2.856	6.90315	5.82817	5.99017	5.14304	8.73294	5.13399	4.68687	6.47443		0.238	0.137
754.438	2880.92	4902.92	703.587	2832.84	12521.3	830.251	1652.18	1751.11	2817.12	1576.37	4154.03	5344.86	3209.14	5029.59		185.475	733.799	788.779	205.133	505.34	1450.81	221.451	344.398	363.492	516.082	295.871	1111.48	1009.18	477.91	421.224		4.0676	3.92603	6.21584	3.42991	5.60581	8.63056	3.74914	4.7973	4.81746	5.45867	5.32789	3.7374	5.29622	6.71494	11.9404		0.276	0.067
1909.21	3811.95	515.902	747.966	3961.72	1869.45	902.367	1182.51	6751.11	1127.96	7641.46	4010.72	1127.03	2463.02	13488.4		280.76	748.934	215.118	217.275	780.813	329.206	258.302	319.881	799.384	364.852	814.286	854.937	266.325	510.056	1561.02		6.80015	5.08983	2.39823	3.44249	5.07384	5.67867	3.49346	3.69671	8.44539	3.09155	9.38424	4.69125	4.2318	4.82892	8.64071		0.304	0.085
1700.26	1818.6	2759.8	2106.14	6053.07	1406.25	612.981	1614.28	1294.38	912.537	1279.59	2750.55	7020.15	4189.16	4856.69		232.836	374.33	507.279	329.013	855.813	330.1	121.837	452.46	214.595	353.836	278.096	669.098	679.873	866.129	583.566		7.30239	4.85829	5.4404	6.40139	7.07289	4.26007	5.03116	3.56777	6.03173	2.57898	4.60124	4.11084	10.3257	4.83665	8.32244		0.394	0.163
1948.96	716.531	1108.54	759.061	1934.17	2383.51	558.432	2763.5	3821.19	3839.68	2780.14	969.859	10158.1	894.97	6551.4		282.916	175.957	312.695	209.156	376.543	415.768	138.018	512.702	581.603	750.994	328.37	210.885	1950.76	163.525	737.379		6.88884	4.07219	3.54513	3.62916	5.13666	5.73278	4.04608	5.39007	6.5701	5.1128	8.46649	4.59899	5.20727	5.47299	8.88472		0.306	0.291
2815.27	2109.84	325.444	969.859	2328.96	4886.28	5924.56	3080.62	1570.82	1189.9	1948.96	2435.28	1777	1498.71	9255.73		421.071	379.19	133.609	218.714	356.966	663.056	728.657	616.242	405.43	378.876	227.493	632.366	381.033	284.526	516.895		6.68598	5.56406	2.43579	4.43437	6.52431	7.36933	8.13079	4.99904	3.87446	3.14062	8.56714	3.85106	4.66363	5.26738	17.9064		0.2	0.184
1717.83	4240.02	2009.98	777.552	1713.2	2572.11	566.753	2396.45	5115.57	880.178	334.689	3649.22	3747.23	1820.45	6096.52		279.866	1052.71	467.748	187.865	428.683	515.985	246.747	393.311	628.754	256.629	178.66	342.435	643.632	280.156	599.377		6.13803	4.0277	4.29715	4.13889	3.99643	4.98486	2.2969	6.09302	8.13604	3.42977	1.87333	10.6567	5.822	6.49799	10.1714		0.276	0.048
1562.5	1533.84	3028.85	1659.58	1926.78	4182.69	2760.72	2436.21	3548.45	3542.9	911.612	3756.47	2900.33	1304.55	5265.35		274.29	245.597	452.443	348.284	457.239	827.297	481.563	553.963	419.614	629.003	377.727	537.509	669.855	200.763	1009.49		5.69653	6.24535	6.69443	4.76501	4.21393	5.05585	5.73284	4.39778	8.45646	5.63256	2.41341	6.98867	4.32979	6.49796	5.21585		0.261	0.32
870.007	3910.87	2542.53	702.663	3650.15	4419.38	1285.13	3421.78	8515.16	990.2	1206.55	7445.45	3499.45	415.126	5271.82		279.65	607.383	390.922	224.114	567.385	590.502	266.985	639.159	894.048	362.115	395.524	1687.53	400.77	403.796	581.33		3.11106	6.43889	6.50393	3.13529	6.43328	7.48411	4.8135	5.35357	9.52428	2.73449	3.0505	4.41204	8.7318	1.02806	9.06855		0.14	0.133
10524.2	1890.72	3951.55	1825.07	1352.63	1345.23	612.056	1789.94	12158.8	2577.66	8616.86	1715.05	3680.66	5230.21	9519.23		1006.19	335.869	732.133	328.08	251.495	215.955	181.203	317.821	1276.56	502.95	1157.44	267.161	640.872	701.534	627.217		10.4595	5.62933	5.39732	5.56289	5.37834	6.22921	3.37774	5.63192	9.52468	5.12509	7.44474	6.41954	5.7432	7.4554	15.1769		0.131	0.211
1118.71	694.342	2340.05	2910.5	3084.32	2012.76	1074.33	1282.36	3026.07	1113.17	1745.56	1654.96	6402.55	2039.57	7366.86		201.987	154.803	354.48	543.375	352.55	701.267	193.344	218.071	472.994	237.615	533.446	384.099	664.045	240.391	928.254		5.53854	4.48533	6.60137	5.35634	8.7486	2.87017	5.55659	5.88047	6.3977	4.68475	3.27224	4.30867	9.64174	8.48439	7.93626		0.345	0.364
2037.72	6223.19	3032.54	4219.68	1449.7	5942.12	3723.19	2491.68	3540.13	2468.57	3392.2	2507.4	17276.3	1866.68	4141.09		262.615	993.565	591.395	528.883	215.653	636.696	739.399	757.366	447.607	424.37	531.056	469.011	1473.38	544.131	645.498		7.75935	6.26349	5.12778	7.97847	6.72239	9.33275	5.03542	3.28993	7.909	5.81701	6.38764	5.34613	11.7256	3.43057	6.41534		0.371	0.079
2745.93	4594.12	1247.23	1899.96	2409.39	6941.57	649.963	11004.1	4829.88	944.896	1215.79	8992.23	2230.03	5482.62	1507.95		535.232	685.763	240.432	382.626	514.665	954.903	132.153	1336.2	712.202	215.118	409.419	1524.58	350.03	926.371	545.258		5.13036	6.69928	5.18744	4.96559	4.68148	7.2694	4.91826	8.23535	6.78162	4.39245	2.96955	5.89819	6.37097	5.91838	2.76557		0.12	0.123
7082.1	4370.38	1017.01	1040.13	1909.21	2956.73	5635.17	1807.51	4128.14	714.682	2814.35	5747.97	2121.86	2812.5	6456.18		1031.88	673.661	216.945	241.268	466.372	428.957	850.994	352.75	781.45	196.177	579.373	857.423	501.47	363.958	1090.85		6.86328	6.4875	4.68788	4.31108	4.09375	6.89284	6.62187	5.12405	5.28267	3.64305	4.85758	6.70377	4.23127	7.72754	5.9185		0.084	0.121
3397.74	3607.62	3357.06	11361.9	5593.56	1880.55	784.948	306.953	4815.09	2314.16	1540.31	5309.73	5501.11	1833.39	28505.9		525.657	884	453.2	1810.18	913.786	289.248	198.8	78.363	651.597	788.032	534.016	544.791	633.333	533.019	1872.83		6.4638	4.08102	7.40747	6.27666	6.12131	6.5015	3.94843	3.91707	7.38967	2.93664	2.88439	9.74635	8.68597	3.43964	15.2208		0.155	0.058
704.512	1653.11	2602.63	4307.51	5428.99	6976.7	1331.36	5128.51	5661.98	1691.01	1620.75	2069.16	3050.11	626.849	8063.98		149.46	461.102	364.658	733.533	1042.98	1050.21	226.407	990.155	664.979	374.387	433.866	226.133	376.47	171.411	986.123		4.71372	3.58512	7.13717	5.87227	5.20525	6.64314	5.88039	5.17951	8.51453	4.51675	3.73559	9.15018	8.10187	3.65699	8.17746		0.396	0.098
9047.71	2724.67	302.33	3513.31	2990.94	3357.06	512.204	2308.62	3735.21	913.462	858.913	2218.93	3746.3	351.331	6777.92		1508.02	434.396	218.288	763.619	517.072	637.709	153.21	518.511	579.663	182.659	244.817	414.988	425.577	206.726	917.182		5.99971	6.27231	1.38501	4.60087	5.78438	5.26426	3.34315	4.4524	6.44376	5.00091	3.50839	5.34699	8.80288	1.6995	7.38994		0.05	0.181
1225.04	1664.2	2069.16	248.706	5010.17	784.948	1394.23	6025.33	2751.48	993.898	1697.48	2479.66	1789.94	4240.94	7677.52		215.761	495.371	453.353	114.941	858.243	182.233	254.73	634.289	640.035	284.702	287.615	437.285	291.598	444.108	1237.47		5.67775	3.3595	4.56412	2.16377	5.83771	4.30739	5.47337	9.49935	4.29895	3.49101	5.90193	5.67058	6.13839	9.54934	6.20419		0.331	0.085
1105.77	2947.49	4002.4	268.121	3913.65	1674.37	5834.87	1140.9	3118.53	690.643	3405.14	7875.37	4137.39	4271.45	8403.29		192.275	624.844	613.362	100.78	597.494	365.608	1238	274.62	632.866	215.311	578.28	1366.46	874.947	542.401	1096.52		5.75098	4.71715	6.52535	2.66046	6.5501	4.57969	4.71316	4.15448	4.92763	3.20765	5.88839	5.76335	4.72873	7.87508	7.66361		0.376	0.095
1738.17	3406.07	4277	399.408	2064.53	2460.24	707.286	2037.72	4356.51	1828.77	5805.29	3698.22	5540.86	332.84	2162.54		338.355	655.613	497.431	161.369	294.221	369.438	235.942	268.618	618.318	397.214	818.632	619.944	945.635	214.225	258.262		5.13711	5.19524	8.59817	2.47512	7.01695	6.65942	2.99771	7.58595	7.04574	4.604	7.09145	5.96542	5.85941	1.55369	8.37342		0.191	0.1
100.777	8006.66	3523.48	3227.63	7852.26	3614.09	504.808	2562.87	1854.66	1254.62	989.275	1561.58	1235.21	1995.19	1536.61		49.943	1491.58	507.416	503.24	1016.48	596.408	193.151	291.525	514.352	417.918	284.019	375.52	328.177	429.656	614.125		2.01784	5.36792	6.94397	6.41369	7.72493	6.05976	2.61354	8.79125	3.60582	3.00208	3.48313	4.15843	3.76384	4.6437	2.50212		0.508	0.045
1890.72	8577.11	6127.96	9448.04	301.405	2307.69	954.142	1667.9	9849.3	600.962	1164.02	8698.23	367.973	3185.1	5011.1		347.174	1210.02	932.06	1034.71	218.714	405.703	188.895	280.546	1043.43	126.947	328.66	1020.83	209.196	556.233	911.139		5.44602	7.0884	6.57464	9.13113	1.37808	5.68813	5.05118	5.94519	9.43936	4.73396	3.5417	8.52075	1.75899	5.72619	5.49981		0.197	0.074
1801.04	13186.9	2267.94	1422.89	383.691	4889.05	1358.17	4217.82	6451.55	1282.36	3959.87	2719.12	1941.57	4984.28	7983.54		355.1	1424.31	349.797	212.069	126.52	624.731	212.012	429.563	876.717	329.11	496.288	460.306	296.667	589.529	1011.4		5.07191	9.25849	6.48358	6.70957	3.03265	7.82585	6.40611	9.81887	7.35876	3.89644	7.97898	5.9072	6.5446	8.45469	7.89359		0.179	0.082
1689.16	3814.72	5850.59	846.893	1703.96	2942.86	604.66	1868.53	1003.14	2197.67	409.578	2844.86	2347.45	10444.7	5276.44		264.305	520.901	876.547	180.229	317.338	442.828	144.431	412.03	199.774	507.159	202.22	407.296	348.204	1312.41	1049.86		6.39096	7.32331	6.67459	4.69898	5.36953	6.64561	4.1865	4.53493	5.02139	4.3333	2.02541	6.98475	6.74159	7.95843	5.02586		0.304	0.177
929.179	3481.88	1906.43	5852.44	4073.59	5401.26	2773.67	2067.31	9246.49	1829.7	3035.32	5306.95	919.009	1793.64	11732.6		303.273	556.08	446.571	1210.72	657.793	562.179	367.281	243.942	711.173	406.983	506.66	750.687	245.034	356.556	1338.16		3.06384	6.26147	4.26905	4.83385	6.19282	9.60772	7.5519	8.47459	13.0017	4.49576	5.99084	7.06946	3.75054	5.03046	8.76775		0.127	0.141
958.765	1864.83	6311.02	934.726	4501.66	4257.58	1231.51	1788.09	1737.24	2054.36	5914.39	5897.74	2535.13	4201.18	2622.04		237.592	322.7	759.603	201.053	630.363	681.74	290.608	502.99	263.219	728.577	490.768	901.057	393.834	322.971	454.93		4.03534	5.77883	8.30832	4.64915	7.14138	6.24517	4.2377	3.55493	6.59998	2.81969	12.0513	6.54536	6.43706	13.0079	5.76361		0.213	0.225
851.516	4457.29	3199.89	736.871	4403.66	11610.6	867.234	340.237	4349.11	1830.62	4237.24	7414.02	6454.33	2588.76	4271.45		161.932	483.966	629.6	233.496	571.521	1248.99	160.475	134.679	732.173	472.954	718.358	1096.05	758.066	568.511	574.901		5.25848	9.20992	5.08242	3.15582	7.70516	9.29594	5.40417	2.52628	5.94001	3.87061	5.89851	6.76429	8.5142	4.55357	7.42989		0.408	0.239
5025.89	2222.63	2151.44	5438.24	1748.34	4610.76	1663.28	6076.18	5617.6	1893.49	1739.09	2039.57	1105.77	15783.1	4309.36		728.44	337.034	325.94	737.049	262.205	633.139	360.522	808.703	828.214	271.337	610.659	892.005	400.344	1423.66	592.072		6.89952	6.59468	6.60073	7.3784	6.66782	7.28239	4.61352	7.51349	6.78279	6.97837	2.84789	2.2865	2.76205	11.0862	7.27843		0.119	0.246
1767.75	2809.73	3000.18	912.537	3029.77	2673.82	914.386	8645.52	11822.3	1285.13	1210.24	4403.66	1525.52	7671.97	1859.28		343.215	734.313	560.619	213.605	703.923	402.557	140.215	997.991	1499.42	241.518	487.686	604.777	441.075	694.855	455.333		5.15056	3.82633	5.35156	4.27208	4.30412	6.64208	6.52131	8.66293	7.88458	5.32107	2.4816	7.28146	3.45864	11.0411	4.08335		0.189	0.065
2394.6	2192.12	5297.71	2528.66	2543.45	4641.27	1481.14	2376.11	4930.66	2767.2	3237.8	1960.06	333.765	5063.79	6335.06		442.611	352.059	872.558	448.847	552.387	990.645	277.71	272.271	827.434	390.375	468.255	371.804	148.84	593.551	758.493		5.41017	6.22658	6.07147	5.63368	4.60448	4.6851	5.3334	8.727	5.95897	7.08856	6.9146	5.27175	2.24244	8.53135	8.35217		0.154	0.222
1554.18	2316.94	6412.72	3495.75	2200.44	2789.39	2757.03	7032.18	2911.43	1930.47	2316.01	3517.01	3920.12	1353.55	4024.59		242.218	433.35	668.672	654.583	520.508	760.456	558.173	864.246	435.852	376.76	282.353	605.983	479.986	434.082	524.064		6.41645	5.34657	9.59024	5.34042	4.22749	3.66804	4.93938	8.13677	6.67985	5.12388	8.20254	5.80381	8.16715	3.11819	7.67958		0.333	0.155
1465.42	14864.1	15381.8	688.794	2887.39	7215.24	481.694	2525.89	5366.12	3297.89	5863.54	1535.69	371.672	1649.41	648.114		211.272	633.546	776.419	145.284	538.089	718.945	251.64	414.835	638.989	619.848	929.63	380.726	130.366	303.933	347.311		6.93619	23.4617	19.8113	4.74102	5.36601	10.0359	1.91422	6.0889	8.39783	5.32049	6.30739	4.03358	2.85099	5.42688	1.86609		0.413	0.465
704.512	3925.67	2261.46	2478.74	2218.93	8948.78	2466.72	2064.53	1903.66	889.423	676.775	2278.11	2637.76	3750.93	10099.9		153.443	1033.2	460.676	630.79	364.425	1294.12	377.75	458.133	537.155	221.297	257.056	497.494	391.622	419.108	1305.75		4.59136	3.79951	4.90901	3.92957	6.08887	6.91496	6.53002	4.50641	3.54397	4.01914	2.63279	4.57916	6.73547	8.94978	7.73488		0.376	0.046
1502.4	6732.62	3612.24	1439.53	1597.63	4951.92	812.685	407.729	6531.99	1113.17	3582.66	9252.03	2879.99	2935.47	5449.33		294.784	850.341	712.549	389.368	265.761	715.582	124.13	302.42	952.747	287.695	708.919	1010.54	440.785	390.648	1026.25		5.09663	7.91755	5.06946	3.6971	6.01154	6.92013	6.54705	1.34822	6.85595	3.86926	5.05369	9.15551	6.53378	7.51435	5.30994		0.217	0.117
1302.7	2053.44	9757.77	3537.35	1140.9	8537.35	5061.02	4659.76	10736.9	1796.41	828.402	2523.11	3487.43	2149.59	5381.84		220.034	360.482	725.061	532.689	270.308	900.904	684.716	808.983	1122.45	326.913	293.714	1000.17	916.635	479.93	720.401		5.92045	5.69637	13.4579	6.64056	4.22075	9.47643	7.39142	5.76003	9.56556	5.49508	2.82044	2.52268	3.8046	4.47897	7.47062		0.338	0.199
860.762	1637.39	1300.85	1406.25	1605.03	4891.83	665.68	6239.83	1774.22	7509.25	1855.58	10343	4225.22	3056.58	6860.21		332.529	265.005	322.174	275.883	263.412	848.041	182.756	1468.04	390.552	1331.97	444.228	986.476	638.522	558.446	751.324		2.58853	6.17871	4.03773	5.09727	6.09323	5.76839	3.64245	4.25045	4.54286	5.63771	4.1771	10.4848	6.61719	5.47337	9.13082		0.098	0.293
1102.07	1582.84	2458.39	245.007	2230.03	4506.29	6311.02	3245.19	2530.51	1428.44	4933.43	3442.12	1769.6	1605.03	4814.16		244.181	407.899	490.382	125.04	410.659	938.746	1195.22	617.015	411.222	499.627	785.746	929.411	349.467	307.369	695.981		4.51334	3.88047	5.01322	1.95943	5.43037	4.80033	5.28021	5.2595	6.15363	2.85901	6.27866	3.70355	5.06371	5.22183	6.91709		0.232	0.12
6676.22	1500.56	2725.59	1606.88	1129.81	2948.41	1960.98	3691.75	4540.5	2771.82	4459.14	4380.55	3233.17	5919.01	12056.2		1221.52	316.775	565.502	329.303	222.424	364.288	374.274	693.535	513.772	602.54	735.393	462.542	482.279	450.19	1480.93		5.46551	4.73697	4.81977	4.87964	5.07952	8.09362	5.23943	5.3231	8.83757	4.60023	6.06361	9.47059	6.70395	13.1478	8.14097		0.056	0.188
637.944	326.368	3030.7	807.138	2264.24	4271.45	5628.7	3149.04	5602.81	1283.28	2214.31	9731.88	1115.94	5035.13	3280.32		196.491	122.44	699.731	137.358	406.813	833.203	1000.71	619.661	828.487	295.444	637.686	1031.21	295.597	613.539	752.49		3.24668	2.66553	4.33123	5.87616	5.5658	5.12654	5.6247	5.08187	6.7627	4.34358	3.47242	9.43737	3.7752	8.2067	4.35929		0.208	0.274
671.228	2479.66	7509.25	2616.49	994.822	3075.07	890.348	2859.65	2327.11	1358.17	2191.2	2328.03	1729.85	11484.8	2756.1		183.166	540.012	842.319	405.84	255.856	659.073	174.404	655.63	340.688	281.844	831.223	585.232	645.878	1194.51	352.323		3.66459	4.59186	8.91497	6.44711	3.88821	4.66576	5.10509	4.36169	6.83061	4.81888	2.63611	3.97797	2.67828	9.61472	7.82266		0.251	0.107
1093.75	6161.24	414.201	793.269	3161.98	5337.46	905.141	3044.56	2593.38	2281.8	1217.64	1044.75	6243.53	13497.6	3627.03		188.662	841.055	333.399	224.444	602.717	686.479	202.3	654.35	684.096	319.406	422.954	435.352	662.782	895.038	597.551		5.7974	7.32561	1.24236	3.53437	5.24621	7.77513	4.47425	4.65281	3.79096	7.1439	2.8789	2.39978	9.42018	15.0805	6.06983		0.386	0.109
942.123	986.501	8303.44	764.608	2489.83	3697.3	2150.52	2254.99	3401.44	1206.55	4975.96	10940.3	1692.86	4411.06	5080.44		192.974	269.938	938.786	192.355	369.574	483.679	435.892	411.319	540.872	321.168	1053.18	995.715	269.374	1258.04	613.402		4.88212	3.65455	8.84487	3.97498	6.73703	7.64412	4.9336	5.48235	6.28881	3.75674	4.7247	10.9874	6.28443	3.50629	8.28239		0.318	0.17
1409.02	2525.89	4401.81	6903.66	1184.36	6294.38	1409.95	2490.75	1345.23	7589.68	6440.46	1576.37	2028.48	5276.44	4250.19		342.491	484.532	393.215	1020.95	315.938	475.56	259.156	424.04	388.645	776.375	1388.52	712.679	274.757	657.303	658.373		4.11405	5.21305	11.1944	6.76201	3.7487	13.2357	5.44054	5.87387	3.46133	9.77579	4.63837	2.21189	7.3828	8.02741	6.45559		0.151	0.135
792.345	1952.66	4969.49	1433.99	1322.12	1545.86	8648.3	3910.87	3242.42	1037.35	1507.03	5561.21	1757.58	9046.78	7159.76		192.371	386.882	827.337	257.876	231.049	300.747	1039.87	768.422	474.684	271.328	312.985	497.487	294.551	580.67	588.522		4.11884	5.04718	6.00661	5.56076	5.72223	5.14006	8.3167	5.08949	6.83069	3.82324	4.81501	11.1786	5.96698	15.5799	12.1657		0.269	0.164
1255.55	943.047	4262.2	503.883	1664.2	1249.08	989.275	3259.06	3252.59	789.571	4356.51	879.253	2094.12	3219.3	4710.61		237.205	222.287	499.724	150.763	272.271	264.828	186.835	561.399	413.379	160.532	797.308	337.622	467.032	479.97	536.479		5.29309	4.24247	8.52912	3.34222	6.1123	4.71655	5.29491	5.80525	7.8683	4.91846	5.46402	2.60425	4.48389	6.7073	8.78061		0.28	0.24
3945.08	1018.86	5134.98	911.612	861.686	1826.92	4877.96	397.559	2254.07	883.876	7207.84	1143.68	2842.09	5012.94	4607.99		622.278	283.439	576.38	195.751	223.977	253.233	625.27	150.16	425.77	174.637	671.021	203.29	356.733	760.843	982.913		6.33974	3.59464	8.90903	4.657	3.84721	7.2144	7.80136	2.64757	5.2941	5.06122	10.7416	5.62584	7.96698	6.58867	4.68809		0.128	0.159
6875	2001.66	5574.15	1645.71	2161.61	1946.19	2879.07	2929.92	2831.92	1809.36	1640.16	4198.41	5111.87	1723.37	7212.46		702.08	592.885	847.944	360.152	370.701	280.156	615.558	552.177	384.959	455.823	325.827	703.367	856.53	507.223	832.873		9.79233	3.37614	6.57372	4.56949	5.83115	6.94681	4.67717	5.30612	7.35641	3.96943	5.03385	5.96902	5.96812	3.39766	8.65974		0.175	0.072
104.475	6786.24	4658.84	794.194	1704.88	1413.65	3035.32	2532.36	1774.22	679.549	2083.95	3590.05	2270.71	5749.81	6785.32		76.11	1051.26	648.548	183.649	302.71	307.779	632.786	404.93	389.482	186.425	400.44	481.346	484.186	569.718	803.424		1.37268	6.45536	7.18349	4.32452	5.63206	4.59306	4.79675	6.25382	4.55534	3.64516	5.20415	7.45836	4.68975	10.0924	8.4455		0.227	0.077
3281.25	6666.05	3849.85	871.857	3518.86	937.5	631.472	2711.72	2815.27	4569.16	11989.6	1450.63	1638.31	1606.88	8110.21		581.193	1146.17	968.155	189.128	424.877	260.499	164.322	456.95	416.445	960.109	1656.07	616.129	330.1	404.15	526.18		5.64571	5.81592	3.97648	4.60988	8.28207	3.59886	3.84289	5.9344	6.76025	4.759	7.23983	2.35442	4.96308	3.97595	15.4134		0.122	0.064
3009.43	1803.81	3595.6	785.873	1448.78	911.612	981.879	336.538	2772.74	637.019	11136.3	1691.94	2426.96	1347.08	5417.9		477.597	431.033	730.403	176.093	270.074	215.408	291.655	160.669	344.341	147.964	1445.45	627.587	450.81	368.794	738.039		6.30119	4.18485	4.92276	4.46283	5.36438	4.23202	3.36658	2.0946	8.05232	4.30523	7.70436	2.69594	5.38355	3.65266	7.34094		0.166	0.122
2928.99	5147	4105.95	925.481	1934.17	1229.66	1408.1	773.854	3706.55	1418.27	1917.53	3725.04	3313.61	12295.7	4155.88		412.075	842.972	676.71	216.325	378.273	241.051	314.892	294.994	517.482	436.479	419.864	930.797	560.972	1235.28	396.731		7.10791	6.10578	6.06752	4.2782	5.11316	5.10124	4.47169	2.62329	7.16266	3.24934	4.56703	4.00199	5.90691	9.95373	10.4753		0.217	0.091
188.609	4143.86	5254.25	625.925	2317.86	1765.9	600.037	2317.86	2180.1	452.108	5037.91	5423.45	1376.66	1869.45	5648.11		285.202	791.322	610.272	212.189	387.269	287.985	138.855	434.646	429.23	99.05	1353.44	1161.73	206.669	333.342	787.242		0.661317	5.23663	8.60969	2.94985	5.98515	6.13192	4.32132	5.33276	5.0791	4.56444	3.72231	4.66844	6.6612	5.60821	7.17456		0.029	0.083
378.143	4543.27	7667.35	3404.22	2223.56	3300.67	1653.11	8602.07	1906.43	4878.88	1414.57	3058.43	5195.08	8424.56	3553.99		127.606	737.749	737.436	563.909	414.232	491.895	309.839	1028.68	405.083	594.695	409.469	475.504	1253.94	547.494	553.417		2.96336	6.15829	10.3973	6.03682	5.3679	6.7101	5.33537	8.36224	4.70628	8.20401	3.45465	6.43198	4.14302	15.3875	6.42191		0.292	0.105
135.91	3289.57	2092.27	1203.77	2815.27	3312.68	460.429	1881.47	3368.16	2347.45	712.833	3951.55	4842.82	4068.05	3240.57		51.303	410.056	267.588	218.208	446.634	572.374	160.202	342.241	611.422	416.855	277.107	465.302	769.082	526.744	657.513		2.64916	8.02225	7.819	5.51663	6.30331	5.78762	2.87405	5.49751	5.50873	5.63133	2.57241	8.49245	6.29689	7.72301	4.92853		0.649	0.246
857.988	6270.34	4483.17	932.877	1387.76	1556.03	3145.34	1917.53	2098.74	1962.83	9681.95	2090.42	1834.32	8258.14	5502.96		195.268	498.871	524.241	192.275	282.546	300.127	533.953	357.176	457.786	543.448	1016.14	428.143	262.149	750.021	730.017		4.3939	12.5691	8.55174	4.85179	4.91162	5.18457	5.89067	5.36859	4.58455	3.61181	9.52815	4.88253	6.99724	11.0105	7.53812		0.283	0.317
1174.19	4105.95	3218.38	1037.35	1422.89	4914.02	633.321	3468.93	5709.14	3541.97	529.771	4039.39	3943.23	6681.77	1936.94		219.198	782.543	480.083	394.318	326.623	1192.98	186.505	784.169	662.299	496.618	242.081	428.505	588.539	1037.25	496.474		5.35674	5.24694	6.7038	2.63075	4.35637	4.11912	3.39573	4.42371	8.62018	7.13219	2.1884	9.4267	6.70004	6.44182	3.9014		0.307	0.084
110.022	2942.86	4093.01	3097.26	3550.3	2973.37	2195.82	1884.25	3772.19	3384.8	3395.89	5234.84	2868.9	3258.14	4191.94		71.757	367.185	559.613	585.272	504.013	605.46	494.711	396.868	600.27	384.646	834.643	641.844	419.341	540.632	739.552		1.53326	8.01466	7.314	5.29201	7.04406	4.91093	4.43859	4.74779	6.28415	8.79978	4.06868	8.15593	6.84144	6.02653	5.66821		0.269	0.274
544.564	9240.01	1435.84	1544.01	1435.84	1309.17	730.399	2012.76	1675.3	1003.14	675.851	3912.72	3599.3	625	12206		129.103	980.104	217.041	323.204	214.265	246.531	178.773	287.752	367.885	171.314	300.69	486.592	797.791	400.964	985.383		4.21806	9.42759	6.61551	4.7772	6.70122	5.31037	4.08562	6.99477	4.55386	5.85558	2.24767	8.04107	4.51158	1.55874	12.3871		0.411	0.121
4467.46	3149.96	1519.05	1860.21	1476.52	4284.39	3094.49	8208.21	2343.75	2683.99	2844.86	3333.95	2798.63	15574.1	6268.49		697.011	349	329.246	356.636	281.846	733.22	695.291	1200.56	419.108	518.181	434.606	917.149	384.919	1767.76	861.816		6.40945	9.02568	4.61371	5.21598	5.23873	5.84326	4.45064	6.837	5.59223	5.17963	6.54583	3.63512	7.2707	8.81012	7.27358		0.116	0.325
6474.67	374.445	7561.02	4989.83	1182.51	3899.78	797.892	1958.21	3121.3	1299.93	1059.54	2138.5	2282.73	4296.41	8514.24		999.648	188.058	1016.74	788.265	276.27	740.179	170.654	384.066	379.19	341.968	286.062	445.934	399.934	451.184	1043.14		6.47695	1.99111	7.43654	6.33014	4.28026	5.2687	4.6755	5.09863	8.2315	3.80131	3.70389	4.79555	5.70776	9.52253	8.16213		0.081	0.133
5510.35	4742.05	2190.27	768.306	1014.24	2032.17	1391.46	2105.21	4241.86	1094.67	2011.83	2094.12	1162.17	13036.2	2878.14		1081.99	714.729	375.787	181.396	177.88	353.683	274.62	518.005	466.702	218.208	515.278	378.7	362.172	796.141	735.682		5.09281	6.63475	5.8285	4.23552	5.70181	5.74575	5.06685	4.06408	9.08902	5.01666	3.90437	5.52976	3.20888	16.3743	3.91221		0.059	0.117
793.269	4875.19	9525.7	773.854	404.956	1642.94	1590.24	2039.57	1183.43	1447.86	556.583	7600.78	5102.63	4633.88	3478.18		215.721	598.468	1207.07	169.158	138.855	453.667	398.847	459.516	299.99	385.226	209.002	957.67	665.815	849.111	955.16		3.67729	8.14611	7.89161	4.57474	2.91639	3.62146	3.98709	4.43852	3.9449	3.75846	2.66305	7.93674	7.66373	5.45733	3.64146		0.214	0.171
833.95	1941.57	4663.46	655.51	3080.62	8437.5	970.784	4285.32	5084.14	4186.39	780.325	2936.39	3982.99	3212.83	4093.01		251.27	368.754	605.363	301.35	314.482	1546.88	298.237	889.229	527.853	554.032	316.445	577.54	602.234	582.303	690.985		3.31894	5.26521	7.70358	2.17524	9.79586	5.45453	3.25508	4.81914	9.63173	7.55623	2.46591	5.08431	6.61369	5.51746	5.92344		0.166	0.179
1993.34	1624.44	3268.31	318.047	1863.9	4379.62	2751.48	5716.53	1816.75	1554.18	380.917	3252.59	1697.48	5594.49	11436.8		360.289	284.082	628.923	122.867	345.621	640.895	512.139	834.393	353.82	389.501	174.79	965.862	309.936	820.988	1246.86		5.53262	5.71823	5.19667	2.58855	5.39292	6.8336	5.37252	6.85113	5.13468	3.99018	2.17928	3.36755	5.47689	6.81434	9.17249		0.193	0.253
625	1428.44	6132.58	656.435	1218.57	2933.62	872.781	2657.18	2529.59	2776.44	755.362	2432.51	5141.46	1078.03	4856.69		173.334	282.216	738.409	269.101	237.809	698.871	186.835	483.543	380.51	421.016	193.401	644.228	860.673	244.801	784.813		3.60576	5.06151	8.30513	2.43936	5.12413	4.19765	4.6714	5.49522	6.64788	6.59462	3.90568	3.77585	5.97376	4.40371	6.18835		0.261	0.225
145.155	2447.3	1643.86	1936.94	4189.16	1736.32	1370.19	2770.89	3510.54	3269.23	563.055	3614.09	2536.98	2045.12	6023.48		47.554	532.456	315.102	417.651	687.766	396.787	261.625	458.543	578.183	399.644	295.268	990.115	525.657	577.483	685.859		3.05242	4.59625	5.21692	4.63771	6.09097	4.37594	5.23724	6.04282	6.07168	8.18036	1.90693	3.65017	4.82631	3.54143	8.78239		0.807	0.108
699.889	3676.04	2233.73	1191.75	1789.94	4233.54	4359.28	2345.6	2403.85	3080.62	3090.79	2388.13	9778.11	2441.75	3172.15		175.723	725.954	272.464	192.974	304.65	806.303	854.18	520.701	520.274	351.43	532.52	517.225	751.75	318.754	382.416		3.98291	5.06373	8.19825	6.17572	5.8754	5.25056	5.10347	4.50469	4.62035	8.76596	5.80408	4.6172	13.0071	7.66031	8.29503		0.285	0.088
618.528	7696.01	451.183	1989.64	2064.53	1268.49	5432.69	2757.03	3451.37	2522.19	2382.58	2429.73	6637.39	3336.72	13721.3		180.969	872.968	158.456	357.489	441.098	227.027	795.988	471.787	661.906	384.396	879.437	470.331	781.047	544.188	1154.12		3.41787	8.81591	2.84737	5.56561	4.68044	5.5874	6.82509	5.8438	5.21429	6.56143	2.70921	5.16601	8.49807	6.13156	11.889		0.237	0.127
1694.71	1506.1	4801.22	1220.41	1420.12	2293.82	6606.88	1827.85	2546.23	3243.34	604.66	2120.93	1127.03	4075.44	2404.77		247.697	293.328	736.036	383.366	260.032	520.241	904.903	372.544	779.503	508.188	186.409	296.844	409.999	499.337	453.82		6.84188	5.13453	6.52308	3.18342	5.46132	4.40916	7.3012	4.90639	3.26648	6.38217	3.24373	7.14494	2.74887	8.16171	5.29895		0.347	0.22
1032.73	1946.19	5084.14	932.877	1642.94	4583.95	1651.26	2553.62	6755.73	3872.97	3039.02	3866.49	5896.82	1870.38	4041.24		313.548	386.882	916.329	227.823	212.865	729.124	291.831	398.187	1039.78	361.685	796.231	449.917	547.647	249.057	550.037		3.29369	5.03045	5.54837	4.09474	7.71821	6.28693	5.65826	6.41313	6.4973	10.7081	3.81675	8.59379	10.7676	7.50984	7.34721		0.132	0.163
109.098	510.355	3864.64	1041.05	1477.44	4052.33	1343.38	3808.25	2515.72	4387.94	1037.35	1385.91	1827.85	1977.63	11345.2		62.512	127.1	561.149	265.142	321.281	509.009	285.636	479.077	553.28	434.071	315.238	247.481	303.177	264.868	1051.39		1.74523	4.01538	6.88702	3.92639	4.59859	7.96121	4.70312	7.94913	4.54691	10.1088	3.29069	5.60007	6.02898	7.46646	10.7907		0.351	0.397
5503.88	3578.03	1051.22	505.732	1960.98	3255.36	1271.27	3207.29	2150.52	4035.69	370.747	7393.68	2316.94	2500.93	3761.09		965.042	450.714	187.262	167.991	522.977	669.331	209.059	434.919	383.503	343.587	126.247	838.256	333.616	558.799	564.512		5.70326	7.93859	5.61363	3.01047	3.74966	4.86361	6.08089	7.37444	5.60756	11.7458	2.93668	8.82031	6.94492	4.47554	6.66256		0.074	0.221
114.645	1732.62	1920.3	1233.36	2445.45	6667.9	1985.02	5560.28	2245.75	2453.77	2334.5	2929.92	2950.26	3219.3	2405.7		50.837	312.422	332.296	292.105	466.428	810.616	342.475	835.682	527.717	381.752	552.443	664.882	485.699	602.234	495.878		2.25515	5.54576	5.77889	4.22231	5.24293	8.22572	5.79611	6.65358	4.25559	6.42766	4.22578	4.40668	6.07425	5.3456	4.85138		0.557	0.223
2574.89	2041.42	1116.86	3904.4	1205.62	3832.29	6195.45	4276.07	1527.37	2254.07	1090.98	792.345	3583.58	5716.53	7843.94		393.521	360.852	233.439	688.989	201.23	846.278	859.273	661.542	276.6	412.155	368.931	277.413	604.97	708.686	861.253		6.54321	5.65722	4.78439	5.66686	5.99126	4.5284	7.21011	6.4638	5.52193	5.46898	2.95713	2.85619	5.92357	8.06638	9.10759		0.209	0.197
661.982	1246.3	1156.62	546.413	864.46	3239.64	844.12	3492.05	3143.49	2292.9	1700.26	1629.07	12878.1	1519.05	509.43		195.227	262.342	248.824	153.773	205.173	630.09	196.121	553.553	350.167	465.552	534.629	343.714	1123.02	311.859	109.406		3.39083	4.75068	4.64835	3.55337	4.21332	5.14156	4.30408	6.30843	8.97712	4.92512	3.18026	4.7396	11.4675	4.87094	4.65633		0.218	0.228
3356.14	2079.33	2664.57	719.305	1888.87	7345.6	2740.39	4080.99	1137.2	992.973	3065.83	1240.75	1050.3	2209.69	6017.01		459.766	492.498	392.161	189.788	384.822	729.43	624.007	534.419	226.31	324.081	564.625	303.426	186.972	1079.93	797.131		7.29967	4.222	6.79458	3.79004	4.90842	10.0703	4.39159	7.63631	5.02498	3.06397	5.42985	4.08915	5.6174	2.04615	7.54834		0.2	0.108
283.839	1309.17	2195.82	6248.15	2803.25	2437.13	1060.47	2661.8	2198.59	775.703	1834.32	869.083	2303.99	9784.58	1577.29		140.931	614.722	332.666	1198.1	487.155	490.632	253.523	396.401	373.187	128.966	565.278	245.944	366.678	751.637	510.756		2.01403	2.1297	6.60068	5.21504	5.75434	4.96733	4.18292	6.71491	5.8914	6.01479	3.24499	3.53366	6.28343	13.0177	3.08815		0.18	0.044
1882.4	1140.9	5284.76	2562.87	2107.06	1728.92	943.047	3161.98	2270.71	1606.88	668.454	6470.97	2135.72	2132.03	7526.81		272.271	311.955	759.329	476.357	405.18	319.318	242.218	573.307	382.723	462.115	263.098	600.56	309.976	554.543	820.361		6.91369	3.65726	6.95978	5.38015	5.20032	5.41441	3.89338	5.51534	5.93304	3.47723	2.5407	10.7749	6.88997	3.84466	9.175		0.319	0.147
726.701	4510.91	6373.89	682.322	1592.09	6923.08	603.735	2012.76	6096.52	309.726	1288.83	2014.61	2619.27	7198.6	3980.21		244.921	646.061	736.076	194.021	318.658	814.149	193.731	353.506	818.405	64.998	460.845	418.754	471.441	724.571	564.899		2.96708	6.98217	8.65928	3.51674	4.99622	8.50345	3.11636	5.69371	7.44928	4.76516	2.79667	4.81096	5.55588	9.93498	7.04589		0.152	0.136
159.948	2279.96	4428.62	1742.79	2656.25	1464.5	862.611	1273.11	1860.21	1438.61	1204.7	1721.52	2522.19	4459.14	8124.07		65.465	485.949	438.129	370.758	548.364	250.707	284.469	247.561	629.743	292.041	556.183	265.198	393.545	728.167	646.738		2.44326	4.69176	10.108	4.70061	4.84395	5.84147	3.03236	5.14263	2.95391	4.92605	2.16601	6.49147	6.4089	6.12378	12.5616		0.469	0.121
141.457	1062.32	2362.24	2244.82	2377.03	2539.76	1469.12	8610.39	1901.81	2745.01	304.179	1397	1771.45	9814.16	5506.66		63.542	292.628	343.175	374.604	455.88	387.035	373.864	1365.87	410.466	529.623	156.959	389.368	318.851	1088.11	457.689		2.2262	3.63026	6.88349	5.99252	5.21417	6.56208	3.92956	6.30397	4.6333	5.18295	1.93795	3.58788	5.55573	9.01947	12.0314		0.44	0.156
127.589	2380.73	1580.99	646.265	1785.32	944.896	5780.32	1240.75	1903.66	3211.91	2101.52	2369.64		941.198	3944.16		58.199	385.152	284.042	173.277	342.628	203.62	1135.83	253.33	269.181	390.081	472.431	806.36		289.442	551.824		2.19229	6.18128	5.56605	3.72966	5.21066	4.64049	5.08906	4.89778	7.07205	8.23395	4.4483	2.93868		3.25177	7.14749		0.473	0.202
149.778	2768.12	3039.02	1428.44	2493.53	1245.38	641.642	1859.28	4698.6	3644.6	3966.35	2289.2		2267.01	5588.02		60.025	373.147	430.493	267.161	566.548	277.107	142.934	330.333	459.902	373.68	744.115	321.104		310.129	861.566		2.49526	7.41831	7.05939	5.34673	4.40127	4.49421	4.48908	5.62851	10.2165	9.75327	5.33029	7.12916		7.3099	6.48589		0.522	0.25
9926.96	2049.74	1239.83	2077.48	2250.37	4460.06	4375.93	1607.8	2204.14	1590.24	774.778	2045.12		5704.51	1088.2		1532.7	291.308	238.838	407.956	297.874	509.339	530.3	241.558	297.407	313.177	226.447	446.924		646.908	434.066		6.47678	7.03634	5.19109	5.09241	7.55477	8.75656	8.25179	6.65597	7.4112	5.07776	3.42145	4.57599		8.81812	2.507		0.053	0.304
912.537	3897.93	3178.62	1360.02	3517.94	2685.84	5664.76	2210.61	1726.15	1952.66	936.575	1764.05		5347.63	3374.63		194.198	542.345	583.719	538.009	554.93	347.914	682.753	319.084	341.445	321.114	224.227	320.308		601.437	742.078		4.699	7.18718	5.44547	2.52788	6.33942	7.71983	8.29693	6.928	5.05541	6.0809	4.17691	5.50736		8.89143	4.54754		0.304	0.167
7371.49	1968.38	2062.68	1389.61	1201.92	6433.99	1234.28	2553.62	5531.62	1969.31	1001.29	3619.64		3988.54	3177.7		998.281	403.49	561.906	221.491	378.12	720.941	209.019	336.392	694.042	505.26	562.365	416.042		650.247	563.185		7.38418	4.87839	3.67087	6.27388	3.17868	8.92443	5.90512	7.59122	7.97015	3.89761	1.78051	8.70017		6.13388	5.64237		0.093	0.152
215.422	2547.15	1468.19	1417.35	4710.61	2867.97	458.58	1454.33	2260.54	1740.02	1671.6	1162.17		6953.59	1508.88		140.038	486.006	420.758	270.871	611.479	353.723	111.892	281.089	334.179	329.576	647.681	377.573		703.167	649.844		1.53831	5.24099	3.4894	5.23255	7.70364	8.10796	4.09842	5.1739	6.76446	5.27956	2.5809	3.07799		9.88896	2.3219		0.138	0.136
104.475	3108.36	3441.2	597.263	2370.56	5287.54	770.155	2371.49	6143.68	1406.25	2074.7			13909.9	3031.62		39.065	708.356	611.639	137.125	572.954	527.893	256.299	331.741	678.384	291.558	827.66			1399.72	544.421		2.67439	4.38813	5.62619	4.35561	4.13744	10.0163	3.00491	7.14861	9.05634	4.82323	2.50671			9.93768	5.56852		0.86	0.078
1143.68	2435.28	3302.51	1325.81	1867.6	4219.68	1053.99	3863.72	1886.1	1175.11	868.158			15841.3	1943.42		232.796	330.663	581.836	297.754	234.759	636.189	231.146	363.23	477.91	287.599	204.803			1443.19	628.063		4.91278	7.36484	5.67602	4.45272	7.95541	6.63274	4.55986	10.6371	3.94655	4.08594	4.23899			10.9766	3.0943		0.265	0.28
113.72	2637.76	1405.33	2642.38	3063.05	2400.15	3852.63	1889.79	4719.86	1222.26	878.328			11236.1	3430.1		43.941	441.581	487.695	594.421	575.56	304.206	635.916	269.666	538.322	276.97	269.004			1385.56	965.985		2.58802	5.97344	2.88157	4.4453	5.32187	7.88988	6.05839	7.0079	8.76772	4.41298	3.26511			8.10947	3.55089		0.74	0.17
2923.45	3307.14	3074.15	699.889	1894.42	2080.25	3721.34	6334.14	680.473	583.395	2585.06			2394.6	4573.78		571.111	471.361	737.419	233.013	303.74	522.028	616.532	687.879	191.148	206.669	536.206			305.43	654.39		5.11888	7.01615	4.1688	3.00365	6.23697	3.98494	6.03592	9.20821	3.55993	2.82285	4.82102			7.8401	6.98938		0.113	0.187
1078.03	2466.72	5376.29	2728.36	2107.06	1259.25	1710.43	5835.8	3441.2	1752.03	8675.11			2894.79	2364.09		305.293	401.51	831.143	435.989	416.622	192.741	243.208	1061.44	407.376	548.147	796.198			394.978	410.522		3.53114	6.1436	6.46855	6.25788	5.0575	6.53336	7.03278	5.49802	8.44723	3.19628	10.8957			7.32898	5.75874		0.145	0.192
113.72	2362.24	8258.14	975.407	2404.77	2438.05	1019.79	9291.79	8705.62	1491.31	4779.03			3567.86	2910.5		63.308	338.339	663.772	222.384	679.447	373.494	209.196	896.681	876.541	429.27	979.114			382.529	434.999		1.7963	6.98188	12.4412	4.38614	3.53931	6.5277	4.87479	10.3624	9.93179	3.47406	4.88098			9.32704	6.69083		0.357	0.259
1095.6	2648.85	7420.49	1000.37	1602.26	2659.95	1339.68	3512.39	3193.42	914.386	591.716			1714.13	5112.8		248.164	462.855	934.046	253.62	441.855	452.83	302.807	583.18	463.242	350.03	209.116			346.184	694.388		4.41482	5.72286	7.94446	3.94437	3.6262	5.87405	4.42421	6.02282	6.89363	2.61231	2.82961			4.95149	7.36302		0.224	0.155
1103.92	1327.66	2800.48	1172.34	1230.58	3051.04	1526.44	6915.68	2715.42	1237.98	2379.81			3715.79	5170.12		308.826	301.543	515.712	220.308	272.931	372.834	218.674	883.903	710.393	417.941	478.12			493.391	1042.3		3.57457	4.4029	5.43032	5.32135	4.50877	8.18336	6.98045	7.82403	3.82242	2.9621	4.97743			7.53113	4.96029		0.145	0.183
2202.29	2597.08	6924.93	1523.67	587.093	1275.89	11836.2	322.67	2094.12	923.632	397.559			349.482	5042.53		471.144	436.302	883.17	259.662	220.734	260.186	1433.98	150.627	345.854	331.693	150.763			94.681	382.103		4.67435	5.95248	7.84099	5.86789	2.65973	4.90375	8.25407	2.14218	6.05492	2.7846	2.63698			3.69115	13.1968		0.125	0.171
3856.32	1237.06	1997.97	3453.22	904.216	1601.33	2103.36	2061.76	2498.15	1721.52	1863.9			3358.91	2228.18		690.309	345.348	354.906	584.073	251.447	243.344	237.012	364.055	339.618	486.416	562.082			715.558	311.705		5.58637	3.58206	5.62956	5.9123	3.59605	6.58052	8.87451	5.66332	7.35577	3.5392	3.31607			4.69412	7.14836		0.102	0.13
1295.3	1418.27	4146.64	1063.24	3010.36	1712.28	2910.5	2773.67	2345.6	2046.04	1046.6			2693.23	4458.21		182.563	308.149	848.804	204.28	722.791	296.337	483.116	605.653	436.279	400.674	280.566			632.303	620.418		7.0951	4.60254	4.88527	5.20482	4.1649	5.77814	6.02444	4.57963	5.37637	5.1065	3.73031			4.2594	7.18582		0.488	0.188
870.932	1597.63		554.734	3143.49	3443.97	3127.77	2281.8	645.34	1448.78	943.047			890.348	4094.86		168.128	328.177		136.892	589.602	557.689	491.975	373.477	247.384	423.171	307.529			421.474	525.93		5.18017	4.86821		4.05235	5.33155	6.17543	6.35759	6.10963	2.60866	3.42363	3.06653			2.11246	7.78594		0.387	0.186
695.266	2063.61		852.441	2512.02	1726.15	423.447	1107.62	2904.96	1870.38	420.673			4902	2170.86		215.681	419.091		192.934	580.147	296.941	163.428	202.163	449.297	357.996	179.883			698.234	290.705		3.22358	4.92401		4.4183	4.32997	5.81309	2.59103	5.47884	6.46556	5.22458	2.33859			7.02056	7.46756		0.188	0.148
584.32	1309.17		1174.19	1621.67	10526.1	3757.4	2120.01	732.249	1013.31	2876.29			869.083	9127.22		186.095	269.704		308.712	275.554	1120.36	494.735	428.297	261.955	220.597	369.864			234.076	922.138		3.1399	4.85411		3.8035	5.88513	9.39528	7.59476	4.94985	2.79532	4.59351	7.77663			3.71282	9.89789		0.212	0.226
821.93	1940.64		962.463	3588.2	7193.05	576.923	4738.35	16735.4	1415.5	1176.04			2414.02	6534.76		192.468	367.418		253.426	621.271	759.973	174.404	821.141	1646.81	390.785	226.833			495.258	578.207		4.27048	5.28184		3.79781	5.77558	9.46487	3.30797	5.77045	10.1623	3.62219	5.18459			4.87426	11.3018		0.279	0.181
1019.79	6557.88		932.877	552.885	6656.81	1592.09	3219.3	10609.3	3795.3	1389.61			716.531	4000.55		292.838	1329.02		198.18	231.709	811.253	391.292	493.858	910.56	623.034	455.34			256.863	519.381		3.48242	4.93436		4.70722	2.38612	8.20558	4.06879	6.51869	11.6514	6.09165	3.0518			2.78955	7.70254		0.149	0.047
1554.18	1564.35		592.641	777.552	2451.92	845.969	4276.07	1972.08	2678.44	3198.96			1163.09	1269.42		266.928	295.871		156.766	279.633	451.454	129.763	475.794	296.844	763.675	1103.99			281.283	379.44		5.82247	5.28727		3.78042	2.78062	5.43117	6.51934	8.98723	6.64348	3.5073	2.89763			4.13495	3.3455		0.274	0.225
1237.06	3356.14		2671.97	3968.2	10174.7	960.614	562.13	575.999	1524.59	2659.02			1551.4	2644.23		210.652	710.513		423.574	546.754	1391.74	157.756	240.955	174.17	560.016	307.353			205.543	812.146		5.87251	4.72354		6.30815	7.25773	7.31081	6.08924	2.33293	3.30711	2.72241	8.65137			7.54784	3.25586		0.35	0.084
2180.1	2120.01		3554.92	1121.49	2659.02	891.272	4455.44	1485.76	6240.75	1556.03			14905.7	1999.82		309.992	307.313		596.368	311.939	316.445	210.475	473.171	262.752	950.204	354.053			1522.72	376.173		7.03278	6.89853		5.96095	3.59521	8.4028	4.23457	9.41612	5.65462	6.5678	4.3949			9.78885	5.31621		0.285	0.282
2612.8	344.859		265.348	3024.22	5558.43	1202.85	3717.64	1997.04	6468.19	483.543			5000.93	3024.22		473.324	175.104		168.071	846.898	725.164	184.019	440.148	271.241	575.93	221.934			547.511	435.426		5.5201	1.96945		1.57879	3.57094	7.66507	6.53654	8.44634	7.36261	11.2309	2.17877			9.13393	6.94544		0.147	0.141
1907.36	1385.91		1211.17	1438.61	8175.85	1154.77	2837.46	988.351	1164.94	1328.59			1552.33	6220.41		266.968	378.313		202.26	298.454	901.411	265.955	745.941	269.591	277.903	348.22			305.39	776.83		7.14452	3.6634		5.98818	4.8202	9.07006	4.34198	3.80387	3.66611	4.1919	3.81537			5.08311	8.00743		0.336	0.122
1050.3	3088.02		843.195	1006.84	6677.15	2431.58	1619.82	5026.81	397.559	1213.94			5256.1	4546.97		224.91	656.337		191.011	262.655	1429.25	290.472	263.219	622.301	233.439	313.162			619.501	1011.92		4.66985	4.70493		4.41438	3.83333	4.67179	8.37114	6.15389	8.07778	1.70305	3.8764			8.48441	4.49341		0.261	0.09
1710.43	2427.89		1313.79	2758.88	3453.22	2014.61	5286.61	1628.14	328.217	1584.69			7678.44	6011.46		243.578	503.843		228.466	475.11	370.371	268.851	559.283	322.874	121.644	343.351			746.665	700.97		7.0221	4.81873		5.7505	5.80682	9.32367	7.4934	9.45248	5.04266	2.69818	4.61536			10.2836	8.57592		0.362	0.12
1084.5	3389.42		3016.83	2307.69	2754.25	5669.38	3210.98	1263.87		1985.02			1129.81	1172.34		214.322	657.77		651.147	435.136	515.615	956.963	452.17	281.943		233.029			467.885	317.338		5.06016	5.1529		4.6331	5.30338	5.34169	5.92435	7.10128	4.48271		8.51835			2.41471	3.69428		0.297	0.098
2034.95	1272.19		1053.07	1565.27	5468.75	802.515	1350.78	1976.7		1338.76			1545.86	5095.23		477.564	316.075		345.758	349.604	773.314	138.388	320.308	318.328		350.054			265.625	648.267		4.2611	4.02496		3.04569	4.47728	7.07184	5.79902	4.21712	6.20964		3.82443			5.8197	7.85977		0.112	0.16
1452.48	3034.39		1590.24	4295.49	1877.77	1940.64	2596.15	3955.25		1301.78			894.046	2438.05		256.226	429.793		344.824	773.194	380.663	412.075	590.865	513.459		368.368			341.638	403.45		5.66874	7.06013		4.61174	5.55551	4.9329	4.70944	4.39382	7.70315		3.5339			2.61694	6.04302		0.278	0.206
1122.41	1471.89		912.537	4249.26	4472.08	7094.12	3747.23	993.898		2017.38			5661.06	4894.6		234.332	280.993		221.024	550.19	654.953	1025.27	934.433	276.697		712.042			535.876	544.968		4.78983	5.23818		4.12868	7.72326	6.82809	6.91928	4.01016	3.59201		2.83323			10.5641	8.98145		0.257	0.234
1740.94	3200.81		1212.09	2549		4571.01	1556.95	1406.25		1536.61			3860.95	6117.79		278.233	704.88		390.688	490.085		668.278	270.308	210.749		438.999			634.283	609.766		6.25713	4.54093		3.10246	5.20114		6.83998	5.75992	6.67263		3.50026			6.0871	10.033		0.283	0.081
840.422	2633.14		3276.63	1766.83		1172.34	1427.52	1321.19		3314.53			2604.47	9382.4		171.877	526.937		699.127	505.96		249.91	252.163	311.159		566.935			515.068	1688.95		4.88967	4.99706		4.68674	3.49203		4.69104	5.66108	4.24603		5.84641			5.05657	5.55516		0.357	0.119
1666.97	2118.16		1201	1167.71		543.639	3082.47	1587.46		2222.63			4176.22	5539.02		249.62	530.806		236.915	304.166		123.334	457.578	312.695		328.177			718.181	704.977		6.67805	3.99046		5.06932	3.83907		4.40786	6.73649	5.07671		6.77267			5.815	7.85702		0.336	0.094
5946.75	1687.32		3422.71	2128.33		2770.89	2445.45	2636.83		931.028			5549.19			987.193	394.358		489.915	391.211		417.241	302.462	396.844		350.36			625.874			6.02389	4.27864		6.98633	5.44036		6.64099	8.08515	6.64451		2.65735			8.8663			0.077	0.136
3616.86	3722.26		384.615	2136.65		5574.15	2122.78	1343.38		1099.3			1893.49			526.027	528.24		115.875	426.55		876.574	374.974	241.188		474.017			358.149			6.87581	7.04654		3.31922	5.00914		6.35902	5.66114	5.56985		2.31911			5.28688			0.164	0.168
251.479	1601.33		379.068	4399.96		4100.41	1778.85	1514.42		499.26			3271.08			111.562	355.76		178.62	979.397		639.882	355.703	245.871		221.144			388.065			2.25416	4.50116		2.1222	4.49252		6.40807	5.00093	6.15942		2.25762			8.42921			0.254	0.159
951.368	1739.09		5196.93	1813.98		6552.33	1777.92	1525.52		970.784			4830.81			281.243	376.213		1447.12	413.999		1455.83	316.638	312.559		241.051			623.524			3.38273	4.62262		3.59122	4.3816		4.50074	5.615	4.88074		4.0273			7.74759			0.151	0.154
1536.61	1460.8		9127.22	1571.75		2265.16	2449.15	783.099		1757.58			3934.91			296.941	420.934		1527.38	346.434		378.683	486.086	176.327		353.836			519.011			5.17481	3.47038		5.97573	4.53693		5.98169	5.03851	4.44117		4.96722			7.58156			0.219	0.104
2265.16	3268.31		1370.19	3449.52		4120.75	4460.06	799.741		1202.85			11336.9			383.286	585.296		352.71	676.034		541.082	674.537	283.286		522.664			996.688			5.90985	5.58402		3.88476	5.10258		7.61575	6.61203	2.82309		2.30138			11.3746			0.194	0.12
808.062	5476.15		14743	1595.78		3779.59	1352.63	3643.68		1095.6			3090.79			165.118	612.742		2492.99	326.253		719.758	254.36	342.668		291.268			592.442			4.89385	8.93712		5.91378	4.89125		5.25119	5.31776	10.6333		3.76148			5.21704			0.372	0.183
1380.36	1993.34		281.99	2568.42		2298.45	5569.53	2190.27		1531.99			9117.97			272.367	602.717		108.939	549.144		353.547	908.226	513.805		382.843			886.259			5.06802	3.30726		2.58851	4.67713		6.50111	6.13231	4.26285		4.00161			10.2882			0.234	0.069
4801.22	3267.38		228.365	4934.36		1388.68	1898.11	4228.92		1489.46			17494.5			698.621	424.081		144.101	748.741		232.973	552.29	642.562		434.942			1544.56			6.87242	7.70462		1.58476	6.59021		5.9607	3.43681	6.58134		3.4245			11.3265			0.124	0.228
1119.64	8674.19		750.74	4377.77		3854.47	3172.15	1051.22		1511.65			6996.12			285.402	1173.78		216.791	802.86		716.668	863.602	196.627		335.032			959			3.92302	7.38997		3.46297	5.45272		5.37833	3.67316	5.34626		4.51195			7.29522			0.173	0.079
1014.24	3479.11		2435.28	2133.88		1533.84	1876.85	1926.78		1188.06			3198.04			218.248	717.135		456.523	434.532		365.222	435.152	537.565		531.29			466.895			4.64718	4.85139		5.33441	4.91075		4.19974	4.31309	3.58426		2.23617			6.84959			0.268	0.085
3985.76	4691.2		756.287	2659.95		2121.86	2464.87	3698.22		3030.7			11537.5			494.188	1012.27		265.488	394.341		409.919	502.813	583.043		405.55			1549.82			8.06527	4.63435		2.84867	6.7453		5.17628	4.90215	6.34297		7.47305			7.44446			0.205	0.058
1996.12	4558.99		1593.93	1796.41		2604.47	6664.2	747.041		709.135			3415.31			266.695	569.735		291.268	370.251		430.606	988.922	168.731		265.335			422.004			7.48464	8.00194		5.4724	4.85188		6.04839	6.73885	4.42741		2.6726			8.09308			0.353	0.176
2790.31	2748.71		407.729	1525.52		1793.64	1143.68			2791.24			7290.13			426.8	395.451		131.686	267.025		268.384	234.856			503.457			1003.74			6.53775	6.95081		3.09622	5.71302		6.68311	4.86969			5.54414			7.26293			0.192	0.221
	2929.92		620.377	1305.47		2682.14	1039.2			776.627			3094.49				390.688		187.632	300.417		339.675	280.856			253.603			494.245				7.49938		3.30635	4.34554		7.89619	3.70012			3.06237			6.26104				0.241
	1689.16		5482.62	585.244		1609.65	868.158			1822.3			2357.62				264.772		959.546	140.311		269.648	198.897			272.657			401.857				6.37969		5.71376	4.17105		5.96946	4.36486			6.68349			5.86681				0.303
	1372.97		2994.64	1728		5590.79	1424.74			767.382			2524.96				243.055		606.853	269.978		885.536	381.459			303.78			492.361				5.64879		4.9347	6.40051		6.31345	3.73498			2.52611			5.12828				0.292
	3068.6		203.402	1536.61		4769.79	840.422			1537.54			1989.64				428.183		144.391	310.362		1153.45	236.545			731.803			254.883				7.16657		1.40869	4.95103		4.13522	3.55291			2.10103			7.80611				0.21
	3602.07		4509.06	1218.57		4921.41	1546.78			1622.6			2811.57				741.225		672.341	221.917		910.696	346.981			349.62			366.115				4.85962		6.70651	5.49108		5.40401	4.45783			4.64103			7.67949				0.082
	2244.82		2971.52	1335.06		6463.57	1355.4			607.433			6838.02				361.552		570.628	186.039		1120.43	274.774			153.483			796.174				6.20885		5.20746	7.17623		5.76882	4.93278			3.95766			8.5886				0.216
	1102.07		704.512	1593.93		4875.19	2407.54			539.016			973.558				253.563		209.776	331.676		651.517	359.452			123.664			198.937				4.34634		3.3584	4.8057		7.48282	6.69782			4.35871			4.8938				0.215
	2565.64		281.99	3003.88		1453.4	1101.15			7470.41			3433.8				456.426		148.43	350.127		234.429	223.92			745.425			556.893				5.62116		1.89982	8.57941		6.19975	4.91759			10.0217			6.166				0.155
	3272			4504.44		3201.74	1772.37			2620.19			1480.21				743.125			694.468		636.189	416.292			515.832			360.636				4.40303			6.48617		5.03268	4.25753			5.07955			4.10445				0.074
	2036.8			1400.7		2318.79	4011.65			991.124			3808.25				459.726			321.144		532.279	557.979			423.324			800.157				4.43046			4.3616		4.35634	7.18961			2.34129			4.75937				0.121
	907.914			3484.65		1723.37	4054.18			1711.35			9510.91				191.381			578.457		408.752	952.111			579.673			825.164				4.74401			6.02405		4.21618	4.25809			2.95227			11.5261				0.311
	3014.05			1957.29		1625.37	1233.36			6704.88			1752.03				453.723			344.534		366.622	251.213			931.44			466.525				6.64294			5.68097		4.43337	4.90961			7.1984			3.7555				0.184
	1219.49			1251.85		1360.02	2519.42			2894.79			3883.14				176.987			277.903		224.21	439.738			464.618			645.611				6.89028			4.50463		6.06584	5.72936			6.23046			6.01467				0.489
	2499.07			2766.27		3022.37	6425.67			692.493			4536.8				368.834			412.155		318.231	914.849			230.076			644.291				6.77561			6.71173		9.49742	7.02374			3.00984			7.04153				0.231
	3219.3			550.111		2781.07	3599.3			1080.81			5028.66				369.728			193.031		649.401	490.438			455.92			479.463				8.70723			2.84986		4.28251	7.33894			2.3706			10.4881				0.296
	2155.14			978.18		407.729	2284.58			2965.98			2764.42				323.301			182.892		248.88	430.316			480.3			345.991				6.66605			5.3484		1.63826	5.30907			6.17526			7.98987				0.259
	3014.98			1721.52		2018.31	3447.67			3507.77			1336.91				412.115			218.014		351.8	462.019			708.726			235.419				7.31587			7.89639		5.73708	7.46218			4.9494			5.67884				0.223
	1862.06			1249.08		927.33	2980.77			3054.73			4110.58				301.213			251.737		282.176	368.738			395.388			433.929				6.18186			4.96183		3.28635	8.0837			7.72591			9.47293				0.258
	910.688			2585.06		2008.14	6848.19			948.595			2020.15				162.865			309.276		380.896	880.064			398.784			369.204				5.59167			8.35842		5.27214	7.78147			2.37872			5.47165				0.431
	375.37			2459.32		3011.28	1863.9			1078.03			5904.22				143.031			652.08		459.396	308.946			242.508			936.333				2.6244			3.7715		6.55487	6.03311			4.44535			6.30568				0.231
	1502.4			1222.26		1850.04	4022.74			817.308			1213.02				301.35			327.533		431.483	748.434			270.581			341.558				4.98558			3.73172		4.28762	5.37488			3.02057			3.55143				0.208
	1982.25			1339.68		2977.07	1527.37			2869.82			4128.14				332.489			265.721		447.197	415.398			303.7			553.513				5.96185			5.04169		6.65718	3.67688			9.44953			7.45808				0.225
	2900.33			2859.65		309.726	11635.5			3563.24			6198.23				435.249			411.939		120.711	1231.53			641.588			713.836				6.66362			6.94193		2.56585	9.44806			5.55378			8.68298				0.192
	3005.73			3384.8		4356.51	3321.93			3114.83			5918.08				462.622			377.967		592.731	520.314			860.843			852.924				6.49717			8.95528		7.34989	6.38447			3.61835			6.93858				0.176
	1007.77			1812.13		3972.82	3927.51						1193.6				165.681			319.824		841.965	988.649						295.114				6.08257			5.66602		4.71851	3.97261						4.04455				0.461
	887.574			1428.44		6659.58	2636.83						3260.91				166.518			212.615		896.335	812.476						287.809				5.3302			6.71843		7.42979	3.24543						11.3301				0.402
	3563.24			2500.93		7944.71	1566.2						4788.28				619.204			505.026		1666.74	279.923						444.494				5.75455			4.95207		4.76661	5.5951						10.7724				0.117
	2767.2			1096.52		4014.42	3676.96						2046.04				373.534			215.295		1156.34	668.342						948.571				7.40815			5.09312		3.47165	5.50161						2.15697				0.249
	1781.62			1298.08		4218.75	1087.28						6077.11				353.506			271.627		1043.8	234.952						1420.33				5.03986			4.7789		4.04173	4.62766						4.27867				0.179
	2236.5			1711.35		1985.02	1628.14						7583.21				518.528			269.414		374.644	430.43						931.44				4.31317			6.35213		5.29842	3.7826						8.14138				0.105
	2395.53			1349.85		4942.68	345.784						2365.94				443.271			238.082		841.788	98.527						501.357				5.4042			5.66969		5.87164	3.50954						4.71907				0.153
	3044.56			1046.6		306.953	2719.12						3672.34				400.81			170.421		149.267	541.178						465.165				7.59603			6.14125		2.0564	5.02445						7.8947				0.238
	2126.48			970.784		4631.1	1942.49						12901.3				344.511			174.267		817.182	327.147						1329.6				6.17246			5.57067		5.66716	5.93768						9.70308				0.225
	1747.41			1634.62		1603.18	3667.71						2273.48				269.454			280.526		261.352	715.525						542.618				6.48501			5.82696		6.13418	5.12591						4.18984				0.302
	1570.82			3499.45		4322.3	2315.09						2175.48				269.744			384.822		627	407.103						317.861				5.82338			9.09367		6.89362	5.68674						6.84413				0.271
	1117.79			887.574		2331.73	1512.57						2159.76				284.992			235.322		480.59	300.087						321.941				3.92217			3.77174		4.85181	5.04045						6.70857				0.173
	1447.86			2813.43		1873.15	2857.8						4467.46				451.22			605.09		313.122	845.128						675.037				3.20876			4.6496		5.98218	3.3815						6.61809				0.089
	3002.96			8668.64		1022.56	4003.33						5558.43				500.27			1324.24		187.768	632.206						568.995				6.00268			6.54613		5.44586	6.33232						9.76886				0.151
	1467.27			1504.25		1706.73	1663.28						1197.3				294.334			456.756		334.936	376.487						218.208				4.98505			3.29334		5.09569	4.41789						5.48697				0.213
	1299			2621.12		3212.83	908.839						1859.28				262.519			408.776		406.25	220.597						263.235				4.94822			6.41211		7.90851	4.11991						7.06321				0.237
	2540.68			1264.79		4827.11	1594.86						2794.93				405.743			239.732		722.751	381.459						344.648				6.2618			5.27586		6.6788	4.18094						8.10953				0.194
	2001.66			4364.83		2940.09	1634.62						7058.99				290.978			885.433		428.12	377.927						568.455				6.87909			4.9296		6.86744	4.32521						12.4178				0.297
	2610.95			3815.64		1396.08	2680.29						11415.5				339.095			491.002		277.807	459.049						1065.36				7.69975			7.77114		5.02536	5.83878						10.7151				0.285
	1943.42			918.084		2169.01	6207.47						2181.95				370.388			238.235		382.586	999.624						375.77				5.24698			3.85369		5.66934	6.2098						5.80662				0.178
	357.803			3879.44		2204.14	3144.42						2126.48				81.316			657.713		405.276	451.687						350.167				4.40015			5.89838		5.43862	6.96149						6.07276				0.68
	1533.84			4186.39		3054.73	1475.59						20751.7				206.066			511.712		667.038	384.122						2825.04				7.44344			8.18115		4.57955	3.84147						7.34561				0.454
	1076.18			2466.72		1152.92	2715.42						12925.3				200.707			458.583		224.154	371.361						1149.51				5.36196			5.379		5.14344	7.31208						11.2442				0.336
	1149.22			1208.39		1958.21	2278.11						1754.81				237.205			314.208		405.646	332.546						736.759				4.84485			3.84584		4.82739	6.8505						2.38179				0.257
	1804.73			2107.99		3729.66	994.822						3000.18				326.213			342.048		555.42	272.561						643.938				5.53238			6.16284		6.71503	3.64991						4.65912				0.213
	1881.47			1923.08		4321.38	19939.9						10332.8				245.871			360.482		732.656	2324.29						1308.48				7.65227			5.33474		5.89823	8.57894						7.89681				0.391
	913.462			2740.39		2947.49	1169.56						725.777				195.461			563.555		527.154	335.909						253.716				4.67337			4.86268		5.59132	3.48179						2.86059				0.3
	1234.28			1563.42		2053.44	2153.29						5225.59				406.113			379.576		453.53	388.765						729.237				3.03926			4.11887		4.52768	5.5388						7.16583				0.094
	2047.89			1170.49		1428.44	1958.21						1783.47				255.719			267.958		203.523	457.923						367.435				8.00837			4.36818		7.01856	4.27629						4.85384				0.394
	1086.35			2857.8		3390.35	1914.76						5534.39				303.506			502.757		435.249	331.186						450.384				3.57935			5.68426		7.78944	5.78151						12.2882				0.148
	2818.97			950.444		2896.64	1349.85						770.155				323.341			230.446		368.601	207.796						384.389				8.71826			4.12437		7.85846	6.49604						2.00358				0.339
	1100.22			2278.11		1597.63	1139.05						574.149				235.902			409.316		348.574	229.086						128.636				4.66389			5.56564		4.58334	4.97216						4.46336				0.248
	1102.07			1486.69		5675.85	1248.15						4960.24				194.294			257.506		781.497	198.88						793.551				5.67218			5.7734		7.26279	6.2759						6.25069				0.367
	612.981			3492.97		3627.96	1730.77						7125.56				124.13			501.96		672.518	344.591						623.387				4.93822			6.95867		5.39459	5.02268						11.4304				0.5
	702.663					1661.43	6577.29						5771.08				175.683					480.026	771.528						678.087				3.99961					3.46112	8.52502						8.51083				0.286
	3228.55					10536.2	4744.82						12070.1				544.478					1289.49	630.066						1193.34				5.92962					8.17084	7.53067						10.1145				0.137
	1815.83					3309.91	2445.45						6696.56				352.943					533.349	507.979						406.676				5.14482					6.2059	4.81408						16.4666				0.183
	3143.49					4003.33	967.086						2666.42				460.232					996.575	170.227						302.477				6.83023					4.01709	5.68116						8.81528				0.186
	4287.17					6728	1525.52						521.45				598.934					1026.45	272.327						229.36				7.158					6.55462	5.60179						2.2735				0.15
	1932.32					3333.03	2261.46						4883.51				598.637					517.442	363.355						758.38				3.22787					6.44135	6.22384						6.43939				0.068
	2081.18					3225.78	4011.65						6122.41				506.193					448.597	787.436						511.456				4.11143					7.19081	5.09457						11.9706				0.102
	3915.5					3056.58	733.173						6416.42				547.527					854.59	166.148						649.731				7.15124					3.57667	4.41277						9.8755				0.164
	3661.24					10289.4	3027.92						3029.77				553.707					1831.96	473.734						768.108				6.61224					5.61661	6.39161						3.94446				0.15
	3615.94					748.891	2684.91						1852.81				547.358					264.538	397.761						254.843				6.60617					2.83094	6.75006						7.2704				0.152
	1407.17					411.428	2170.86						11105.8				226.367					88.308	388.685						1117.44				6.21634					4.65901	5.58513						9.93859				0.345
	2405.7					1526.44	5359.65						2291.05				422.391					361.182	499.337						307.643				5.69542					4.22624	10.7335						7.44711				0.169
	1772.37					1394.23	1476.52						3007.58				375.207					325.4	263.042						411.745				4.72372					4.28467	5.61323						7.30447				0.158
	1436.76					1578.22	9215.98						2211.54				266.695					363.122	801.034						285.129				5.38728					4.34624	11.5051						7.75627				0.254
	446.561					588.942	1029.03						2053.44				122.537					253.37	306.516						273.84				3.6443					2.32443	3.35719						7.49868				0.374
	1756.66					1394.23	1246.3						1074.33				388.452					275.98	277.027						370.854				4.5222					5.05193	4.49885						2.89692				0.146
	1565.27					719.305	1214.87						2553.62				250.337					189.925	313.782						518.858				6.25267					3.78731	3.87169						4.92162				0.314
	3510.54					1936.94	636.095						2818.05				511.399					404.986	220.501						743.181				6.86458					4.78275	2.88477						3.79187				0.169
	1031.81					1924							746.117				214.635					367.185							339.225				4.80725					5.23987							2.19948				0.281
	3594.68					1228.73							2741.31				477.773					317.338							264.538				7.52381					3.87201							10.3626				0.198
	1090.05					1891.64							2613.72				265.142					408.873							279.633				4.1112					4.62648							9.34697				0.195
	1161.24												16342.5				292.781												1865.5				3.96625												8.76035				0.17
	1392.38												2488.91				302.71												299.154				4.59972												8.31981				0.191
	1004.99												10312.5				201.6												1088.85				4.98508												9.47101				0.311
	1664.2												6938.79				397.527												779.18				4.18638												8.90525				0.132
	898.669												1674.37				285.539												302.147				3.14727												5.54158				0.139
	1812.13												6321.19				314.948												1183.7				5.75374												5.3402				0.23
	1188.98												4829.88				341.148												534.806				3.48523												9.03109				0.128
	2916.05												5133.14				567.538												1108.44				5.13807												4.63094				0.114
	3471.71												1565.27				443.545												402.323				7.82719												3.89059				0.222
	1093.75												3605.77				323.864												610.722				3.37719												5.90411				0.131
	488.166												12329				156.533												1079.31				3.11861												11.423				0.25
	2053.44												6129.81				383.599												604.1				5.35309												10.147				0.175
	2999.26												7003.51				587.332												443.158				5.10658												15.8036				0.109
	2169.01												2630.36				423.517												335.402				5.12142												7.84242				0.152
	3983.91												7181.03				810.553												975.244				4.91506												7.36331				0.076
	2550.85												4680.1				498.307												1068				5.11904												4.38211				0.129
	978.18												2482.43				262.632												715.115				3.72453												3.47138				0.178
	1422.89												24051.4				284.196												1399.31				5.00673												17.1881				0.221
	2940.09																647.631																4.53976																0.088
	4670.86																988.746																4.72402																0.06
	882.027																312.092																2.82618																0.114
	2965.98																558.623																5.30944																0.119
	1126.11																216.421																5.20333																0.302
	1567.12																362.405																4.32423																0.15
	994.822																233.769																4.25558																0.229
	4074.52																751.42																5.42243																0.091
	1873.15																377.34																4.96409																0.165
	2838.39																680.637																4.17019																0.077
	1716.9																369.011																4.65271																0.158
	3184.17																504.793																6.30788																0.157
	4223.37																798.387																5.28988																0.083
	1088.2																185.145																5.87757																0.399
	2305.84																463.499																4.97486																0.135
	2011.83																297.464																6.76329																0.286
	1407.17																202.686																6.94264																0.43
	2438.98																362.872																6.72132																0.233
	1029.03																194.624																5.28728																0.341
	1405.33																240.568																5.8417																0.305
	1771.45																388.009																4.56549																0.148
	2083.03																380.14																5.47963																0.181
	619.453																194.704																3.18151																0.205
	1026.26																275.61																3.72358																0.17
	3172.15																470.354																6.74418																0.18
	2042.35																302.75																6.74598																0.28
	4306.58																542.755																7.93467																0.184
	1876.85																318.038																5.90134																0.233
	2216.16																453.61																4.88561																0.135
	6618.9																951.644																6.95522																0.092
	2894.79																526.374																5.49949																0.131
	4134.61																658.55																6.27836																0.12
	3653.85																751.364																4.86295																0.081
	6732.62																1146.81																5.87075																0.064
	1846.34																336.102																5.49339																0.205
	2708.95																561.946																4.82066																0.108
	2758.88																577.467																4.77755																0.104
	2941.01																702.9																4.18411																0.075
	8203.59																1790.79																4.58098																0.032
	386.464																108.666																3.55644																0.411
	2941.01																520.041																5.65535																0.137
	2951.18																385.482																7.65583																0.25
	3236.87																504.833																6.41177																0.16
	1966.53																559.419																3.51531																0.079
[truncated: 28 more columns]

## Sheet: Nu
Area																Perim																Circularity																AR
	A0			A0.1			A0.5			A5			A10				A0			A0.1			A0.5			A5			A10				A0			A0.1			A0.5			A5			A10				A0
P5	P10	P15	P5	P10	P15	P5	P10	P15	P5	P10	P15	P5	P10	P15		P5	P10	P15	P5	P10	P15	P5	P10	P15	P5	P10	P15	P5	P10	P15		P5	P10	P15	P5	P10	P15	P5	P10	P15	P5	P10	P15	P5	P10	P15		P5	P10
146.852	235.901	196.844	235.901	145.29	212.467	214.029	209.343	170.286	140.603	228.09	207.78	167.162	948.291	23.434		46.513	60.654	52.548	62.118	44.745	56.083	60.654	52.851	48.281	44.013	56.387	65.225	47.548	122.04	17.373		0.853	0.806	0.896	0.768	0.912	0.849	0.731	0.942	0.918	0.912	0.901	0.614	0.929	0.8	0.976		1.733	1.833
128.105	234.339	70.302	103.109	214.029	268.708	168.724	201.531	221.841	151.539	170.286	193.72	195.282	226.527	199.969		44.745	57.119	44.316	43.281	54.619	63.886	48.281	53.583	57.548	46.084	51.084	52.851	51.816	55.048	56.083		0.804	0.903	0.45	0.692	0.902	0.827	0.91	0.882	0.842	0.897	0.82	0.872	0.914	0.939	0.799		1.94	1.345
153.101	214.029	637.401	193.72	251.524	221.841	159.35	187.471	478.051	151.539	165.599	235.901	226.527	309.327	201.531		45.049	52.851	99.49	71.992	60.351	54.316	47.548	50.048	82.294	44.316	49.316	79.366	56.083	71.992	54.619		0.948	0.963	0.809	0.47	0.868	0.945	0.886	0.941	0.887	0.97	0.856	0.471	0.905	0.75	0.849		1.051	1.19
126.543	823.31	521.794	134.354	182.784	206.218	212.467	209.343	270.271	195.282	178.097	162.475	162.475	107.796	81.237		42.549	110.828	103.203	44.745	50.78	53.583	56.083	55.78	60.351	50.78	50.048	50.048	45.781	38.281	34.746		0.878	0.842	0.616	0.843	0.891	0.903	0.849	0.845	0.932	0.952	0.893	0.815	0.974	0.924	0.846		1.616	1.568
223.403	217.154	149.977	193.72	174.973	185.909	246.837	276.52	253.086	224.965	181.222	174.973	346.821	251.524	462.428		55.351	54.316	46.816	53.28	51.816	53.583	57.851	63.154	58.583	57.119	48.584	49.013	82.598	60.654	84.062		0.916	0.925	0.86	0.858	0.819	0.814	0.927	0.871	0.927	0.867	0.965	0.915	0.639	0.859	0.822		1.53	1.417
223.403	196.844	132.792	164.037	165.599	281.206	142.165	323.387	334.323	128.105	284.331	173.411	356.195	153.101	485.862		55.78	53.583	48.887	49.013	49.316	70.099	44.745	67.421	79.062	40.478	63.154	49.013	70.653	48.281	104.845		0.902	0.862	0.698	0.858	0.856	0.719	0.892	0.894	0.672	0.983	0.896	0.907	0.897	0.825	0.555		1.49	1.663
220.278	181.222	142.165	223.403	196.844	203.094	351.508	259.335	153.101	151.539	178.097	160.913	221.841	245.274	190.595		55.351	49.013	44.316	56.083	51.513	52.119	80.956	59.315	49.316	45.049	48.584	47.548	57.851	57.851	56.083		0.904	0.948	0.91	0.893	0.932	0.94	0.674	0.926	0.791	0.938	0.948	0.894	0.833	0.921	0.761		1.53	1.222
137.479	210.905	184.346	1.562	185.909	296.829	153.101	260.897	359.319	201.531	209.343	809.25	145.29	242.15	228.089		44.013	54.744	51.387	3.535	50.78	64.189	46.513	59.618	69.921	55.048	54.619	108.934	42.549	57.851	61.689		0.892	0.884	0.877	1	0.906	0.905	0.889	0.922	0.924	0.836	0.882	0.857	1	0.909	0.753		1.533	1.607
315.576	239.025	126.543	209.343	192.158	312.452	151.539	245.274	434.308	149.977	110.92	224.965	309.327	210.905	184.346		67.118	57.548	41.21	53.28	49.316	74.921	48.281	56.815	84.188	45.781	40.781	57.851	68.153	54.316	50.048		0.88	0.907	0.936	0.927	0.993	0.7	0.817	0.955	0.77	0.899	0.838	0.845	0.837	0.898	0.925		1.405	1.368
142.165	167.162	199.969	179.66	296.829	285.893	176.535	224.965	234.339	112.483	242.15	167.162	424.934	223.403	443.681		44.745	48.281	52.851	50.048	75.224	78.027	50.048	55.351	57.851	40.049	57.119	49.013	81.081	56.387	90.4		0.892	0.901	0.9	0.901	0.659	0.59	0.886	0.923	0.88	0.881	0.933	0.874	0.812	0.883	0.682		1.489	1.415
146.852	359.319	251.524	140.603	199.969	276.52	417.123	343.697	282.769	109.358	306.203	154.664	340.572	298.391	287.455		46.513	74.063	60.351	45.781	53.887	62.85	80.223	69.618	61.083	37.978	70.653	45.781	69.618	67.421	63.154		0.853	0.823	0.868	0.843	0.865	0.88	0.814	0.891	0.952	0.953	0.771	0.927	0.883	0.825	0.906		1.78	1.388
162.475	171.848	148.414	85.924	206.218	437.432	182.784	246.837	384.315	123.418	378.066	365.568	260.897	365.568	196.844		47.548	49.013	46.816	33.711	52.851	79.188	49.745	57.119	84.794	40.478	92.597	72.421	60.351	70.653	59.922		0.903	0.899	0.851	0.95	0.928	0.877	0.928	0.951	0.672	0.947	0.554	0.876	0.9	0.92	0.689		1.386	1.325
201.531	160.913	573.349	178.097	224.965	209.343	160.913	215.592	329.636	126.543	190.595	201.531	314.014	320.263	173.41		51.816	49.316	103.935	48.281	55.351	54.012	51.387	55.654	67.421	41.513	53.28	51.816	65.35	66.082	50.048		0.943	0.831	0.667	0.96	0.923	0.902	0.766	0.875	0.911	0.923	0.844	0.943	0.924	0.922	0.87		1.06	1.938
248.399	193.72	181.222	235.901	257.773	432.745	164.037	663.96	378.066	164.037	189.033	153.101	257.773	210.905	581.159		63.154	51.084	51.084	58.886	60.351	77.42	49.013	96.561	85.401	46.084	51.513	44.745	61.386	56.083	98.506		0.783	0.933	0.873	0.855	0.889	0.907	0.858	0.895	0.651	0.971	0.895	0.961	0.86	0.843	0.753		1.806	1.403
170.286	224.965	256.21	196.844	248.399	178.097	220.278	315.576	193.72	153.101	176.535	187.471	143.728	254.648	378.066		50.048	55.351	77.295	54.316	59.315	50.351	55.048	64.921	51.084	45.049	49.013	52.119	44.013	59.618	74.188		0.854	0.923	0.539	0.838	0.887	0.883	0.913	0.941	0.933	0.948	0.923	0.867	0.932	0.9	0.863		1.739	1.176
139.041	210.905	170.286	278.082	299.954	207.78	217.154	229.652	506.172	139.041	349.946	239.025	231.214	192.158	192.157		46.513	55.351	49.316	63.154	63.457	53.887	55.351	56.083	84.491	43.281	73.456	58.583	56.083	52.851	53.887		0.808	0.865	0.88	0.876	0.936	0.899	0.891	0.918	0.891	0.933	0.815	0.875	0.924	0.864	0.832		2.098	1.513
201.531	199.969	214.029	168.724	189.033	454.617	146.852	281.206	201.531	59.366	315.576	217.154	185.909	232.776	206.218		51.084	53.583	54.316	48.281	51.513	82.294	47.852	63.583	52.977	40.049	66.386	54.316	49.619	56.815	55.351		0.97	0.875	0.912	0.91	0.895	0.844	0.806	0.874	0.902	0.465	0.9	0.925	0.949	0.906	0.846		1.436	1.388
153.101	159.35	137.479	301.516	243.712	167.162	154.664	201.531	282.769	207.78	182.784	168.724	212.467	190.595	182.784		46.513	50.048	45.781	64.618	58.583	47.548	47.245	51.084	63.154	90.4	49.013	50.78	52.851	54.316	50.477		0.889	0.799	0.824	0.907	0.892	0.929	0.871	0.97	0.891	0.32	0.956	0.822	0.956	0.812	0.901		1.761	1.676
139.041	334.323	226.527	148.414	195.282	157.788	146.852	253.086	270.271	139.041	228.09	270.271	192.158	217.154	453.054		45.781	69.921	59.922	48.709	52.119	47.245	48.281	59.618	64.189	43.281	55.654	106.612	50.048	53.583	86.991		0.834	0.859	0.793	0.786	0.903	0.888	0.792	0.895	0.824	0.933	0.925	0.299	0.964	0.95	0.752		1.626	1.403
146.852	273.395	520.232	218.716	210.905	265.584	199.969	193.72	164.037	137.479	223.403	20.309	201.531	223.403	23.434		45.049	60.351	89.062	55.351	54.316	61.083	55.78	50.351	47.245	43.281	53.583	16.641	51.084	56.387	17.373		0.909	0.943	0.824	0.897	0.898	0.894	0.808	0.96	0.924	0.922	0.978	0.922	0.97	0.883	0.976		1.337	1.368
206.218	189.033	134.354	171.848	248.399	201.531	207.78	162.475	240.588	126.543	151.539	529.605	199.969	235.901	146.852		55.048	50.048	42.245	48.281	58.154	53.583	54.619	46.513	56.815	42.245	44.745	89.794	54.619	57.548	44.013		0.855	0.948	0.946	0.926	0.923	0.882	0.875	0.944	0.937	0.891	0.951	0.825	0.842	0.895	0.953		1.807	1.356
171.848	273.395	192.158	149.977	215.592	292.142	142.165	206.218	148.414	120.294	182.784	167.162	171.848	271.833	159.35		50.048	62.85	52.548	48.887	54.012	61.386	42.978	52.548	46.21	39.013	49.316	49.316	49.013	62.118	47.548		0.862	0.87	0.874	0.789	0.929	0.974	0.967	0.938	0.873	0.993	0.944	0.864	0.899	0.885	0.886		1.605	1.574
165.599	201.531	149.977	168.724	154.664	328.074	178.097	239.025	206.218	120.294	164.037	101.547	218.716	212.467	176.535		47.548	54.619	47.119	50.477	44.013	66.386	50.048	58.886	52.851	39.442	47.548	36.943	54.619	61.512	51.69		0.92	0.849	0.849	0.832	1	0.935	0.893	0.866	0.928	0.972	0.912	0.935	0.921	0.706	0.83		1.401	1.743
181.222	281.206	110.92	189.033	221.841	243.712	306.203	176.535	271.833	142.165	339.01	195.282	243.712	318.701	171.848		52.548	74.492	39.013	51.387	54.619	60.654	76.082	51.816	60.351	44.013	67.421	54.619	58.886	64.618	49.316		0.825	0.637	0.916	0.9	0.934	0.832	0.665	0.826	0.938	0.922	0.937	0.823	0.883	0.959	0.888		1.91	2.021
137.479	242.15	245.274	203.094	174.973	406.187	156.226	218.716	209.343	120.294	217.154	184.346	223.403	157.788	270.27		45.781	57.119	56.815	54.316	51.084	78.456	45.781	56.083	54.619	40.478	55.048	51.084	58.583	47.119	62.422		0.824	0.933	0.955	0.865	0.843	0.829	0.937	0.874	0.882	0.923	0.901	0.888	0.818	0.893	0.872		1.762	1.228
167.161	164.037	170.286	351.508	295.267	220.278	262.459	401.5	221.841	112.483	173.411	110.92	193.72	184.346	501.484		48.28	46.816	48.281	70.956	64.618	57.119	59.618	73.456	55.048	37.246	48.281	39.746	51.084	51.816	89.062		0.901	0.941	0.918	0.877	0.889	0.848	0.928	0.935	0.92	1	0.935	0.882	0.933	0.863	0.794		1.479	1.124
170.286	203.094	99.985	167.162	203.094	285.893	154.664	195.282	212.467	132.792	348.383	165.599	315.576	134.354	115.607		51.084	52.548	37.246	47.548	51.084	66.689	48.709	50.048	56.815	41.513	73.456	89.971	66.689	37.246	39.013		0.82	0.924	0.906	0.929	0.978	0.808	0.819	0.98	0.827	0.968	0.811	0.257	0.892	0.906	0.954		1.699	1.42
181.222	307.765	246.837	120.294	353.07	249.961	189.033	153.101	332.761	179.66	174.973	334.323	149.977	228.09	546.79		50.78	63.886	58.886	41.513	75.224	59.618	50.78	45.781	72.421	51.387	48.281	68.76	45.781	41.21	110.273		0.883	0.948	0.895	0.877	0.784	0.884	0.921	0.918	0.797	0.855	0.943	0.889	0.899	0.994	0.565		1.51	1.295
142.165	653.024	259.335	190.595	223.403	231.214	254.648	206.218	253.086	156.226	189.033	154.664	201.531	198.407	304.64		43.281	96.561	59.618	50.78	56.083	57.119	59.922	51.816	59.618	46.513	50.048	45.049	53.583	55.048	67.118		0.954	0.88	0.917	0.929	0.893	0.891	0.891	0.965	0.895	0.907	0.948	0.958	0.882	0.946	0.85		1.399	1.271
132.792	234.339	156.226	196.844	293.704	304.64	193.72	326.512	351.508	134.354	142.165	109.358	289.018	284.331	292.142		43.281	58.154	46.816	50.78	64.189	66.386	52.119	66.386	71.689	41.513	46.816	39.746	63.583	54.744	64.315		0.891	0.871	0.896	0.959	0.896	0.869	0.896	0.931	0.859	0.98	0.815	0.87	0.898	0.832	0.888		1.443	1.717
145.29	309.327	135.916	196.844	189.033	203.094	171.848	293.704	331.199	143.728	137.479	85.924	212.467	278.082	174.973		45.781	68.153	45.049	52.548	50.351	54.012	49.316	63.154	96.132	44.013	44.013	36.514	55.048	61.815	55.958		0.871	0.837	0.842	0.896	0.937	0.875	0.888	0.925	0.45	0.932	0.892	0.81	0.881	0.935	0.702		1.586	1.513
226.527	374.942	279.644	349.946	214.029	479.613	142.165	342.134	190.595	418.685	184.346	139.041	156.226	179.66	40.619		56.083	73.885	68.457	78.885	56.083	88.026	48.281	68.457	51.084	76.688	50.78	45.477	45.477	66.689	82.544		0.905	0.863	0.75	0.707	0.855	0.778	0.766	0.917	0.918	0.895	0.898	0.845	0.949	0.786	0.075		1.501	1.543
217.154	421.81	156.226	106.234	207.78	156.226	203.094	256.21	198.407	107.796	296.829	185.909	118.732	237.463	396.813		58.28	90.223	45.477	40.781	55.048	48.281	52.548	58.583	53.28	37.246	64.315	50.048	40.478	51.513	76.991		0.803	0.651	0.949	0.803	0.862	0.842	0.924	0.938	0.878	0.976	0.902	0.933	0.911	0.851	0.841		1.89	1.949
139.041	184.346	120.294	199.969	212.467	649.899	181.222	326.512	217.154	98.422	396.813	201.531	153.101	115.607	117.169		48.584	49.013	43.281	55.654	52.548	100.828	51.084	65.654	54.619	35.175	91.865	55.351	45.049	58.154	46.942		0.74	0.964	0.807	0.811	0.967	0.803	0.873	0.952	0.915	1	0.591	0.827	0.948	0.882	0.668		2.318	1.218
145.29	215.592	229.652	151.539	292.142	154.664	159.35	171.848	184.346	303.078	309.327	256.21	154.664	145.29	228.089		48.28	52.851	57.851	47.852	61.386	47.548	48.281	47.852	50.048	88.329	89.062	66.992	45.049	39.442	65.528		0.783	0.97	0.862	0.832	0.974	0.86	0.859	0.943	0.925	0.488	0.49	0.717	0.958	0.934	0.668		2.083	1.3
195.282	201.531	173.411	218.716	276.52	228.09	154.664	259.335	365.568	249.961	207.78	237.463	170.286	193.72	404.624		53.583	54.316	52.119	56.815	65.047	54.316	49.745	58.886	79.795	58.886	52.548	58.154	52.119	48.709	85.097		0.855	0.858	0.802	0.851	0.821	0.972	0.785	0.94	0.721	0.906	0.946	0.882	0.788	0.77	0.702		1.604	1.76
137.479	212.467	198.407	281.206	267.146	162.475	182.784	228.09	218.716	142.165	181.222	145.29	167.162	118.732	473.364		46.513	55.048	77.295	63.154	59.618	46.816	52.119	56.083	55.351	42.549	56.387	46.513	49.013	51.084	89.668		0.799	0.881	0.417	0.886	0.944	0.932	0.846	0.911	0.897	0.987	0.716	0.844	0.874	0.933	0.74		2.003	1.479
135.916	351.508	196.844	157.788	210.905	176.535	157.788	209.343	204.656	226.527	198.407	320.263	139.041	234.339	160.912		44.013	87.723	58.583	47.245	54.619	53.28	47.548	53.583	53.28	55.048	52.119	67.118	44.316	40.781	48.28		0.882	0.574	0.721	0.888	0.888	0.781	0.877	0.916	0.906	0.939	0.918	0.893	0.89	0.897	0.867		1.632	2.692
134.354	210.905	209.343	232.776	431.183	164.037	179.66	214.029	246.837	157.788	215.592	237.463	254.648	382.753	229.652		42.978	53.583	67.724	56.387	78.153	48.281	48.584	53.583	61.689	46.21	55.78	87.901	59.618	55.78	56.815		0.914	0.923	0.574	0.92	0.887	0.884	0.956	0.937	0.815	0.929	0.871	0.386	0.9	0.946	0.894		1.622	1.414
146.852	265.584	290.58	168.724	276.52	184.346	215.592	326.512	139.041	143.728	334.323	167.162	29.683	142.165	254.648		45.477	60.78	83.33	47.852	62.85	52.119	56.815	66.386	44.013	44.013	67.85	49.316	19.141	73.153	87.775		0.892	0.903	0.526	0.926	0.88	0.853	0.839	0.931	0.902	0.932	0.913	0.864	1	0.899	0.415		1.536	1.368
173.41	254.648	217.154	335.885	217.154	529.605	146.852	214.029	165.599	129.667	181.222	235.901	181.222	174.973	164.037		50.048	57.851	54.619	67.85	54.619	86.259	46.21	54.619	46.816	41.513	49.316	57.119	50.351	44.013	46.513		0.87	0.956	0.915	0.917	0.915	0.894	0.864	0.902	0.949	0.946	0.936	0.909	0.898	0.922	0.953		1.714	1.118
140.603	220.278	164.037	157.788	271.833	270.271	203.094	178.097	196.844	153.101	137.479	417.123	189.033	232.776	331.198		46.513	53.583	51.084	50.655	60.654	63.886	53.887	52.548	51.816	46.513	42.245	78.456	52.548	47.852	67.85		0.817	0.964	0.79	0.773	0.929	0.832	0.879	0.811	0.921	0.889	0.968	0.852	0.86	0.96	0.904		1.985	1.03
214.029	376.504	428.059	192.158	360.882	231.214	160.913	206.218	331.199	212.467	212.467	240.588	301.516	95.298	417.122		54.316	104.667	79.062	53.583	78.153	59.922	46.816	52.548	71.814	52.548	52.548	68.457	64.618	58.583	87.901		0.912	0.432	0.861	0.841	0.742	0.809	0.923	0.938	0.807	0.967	0.967	0.645	0.907	0.852	0.678		1.438	1.7
173.41	401.5	185.909	174.973	242.15	143.728	151.539	279.644	387.44	231.214	234.339	224.965	204.656	212.467	323.387		49.013	99.667	51.816	47.548	59.618	45.477	47.548	64.189	72.421	56.083	58.583	55.351	51.816	36.21	66.386		0.907	0.508	0.87	0.973	0.856	0.873	0.842	0.853	0.928	0.924	0.858	0.923	0.958	0.913	0.922		1.649	3.108
159.35	179.66	170.286	189.033	178.097	246.837	240.588	231.214	215.592	192.158	131.23	156.226	199.969	132.792	229.652		48.28	50.048	58.154	51.816	49.013	59.618	56.815	55.351	53.583	50.351	42.978	46.084	52.548	56.083	58.154		0.859	0.901	0.633	0.885	0.932	0.873	0.937	0.948	0.944	0.952	0.893	0.924	0.91	0.849	0.853		1.668	1.508
254.648	210.905	209.343	7.811	235.901	448.368	179.66	260.897	207.78	174.973	107.796	365.568	317.138	232.776	132.792		58.886	53.887	56.387	9.57	58.154	80.527	54.619	60.78	54.316	49.619	37.675	74.492	75.527	41.513	43.584		0.923	0.913	0.827	1	0.877	0.869	0.757	0.887	0.885	0.893	0.954	0.828	0.699	0.968	0.878		1.401	1.359
170.286	212.467	181.222	162.475	170.286	279.644	164.037	245.274	346.821	135.916	129.667	326.512	354.633	131.23	248.399		48.28	53.583	51.084	48.584	50.351	63.886	50.351	57.851	68.153	42.245	44.013	79.366	76.814	56.387	80.401		0.918	0.93	0.873	0.865	0.844	0.861	0.813	0.921	0.938	0.957	0.841	0.651	0.755	0.92	0.483		1.483	1.362
176.535	226.527	478.051	157.788	274.957	387.44	192.158	235.901	221.841	126.543	126.543	118.732	415.561	189.033	46.868		49.316	57.851	95.097	48.584	60.654	89.794	50.78	56.083	54.316	42.245	41.513	40.781	75.224	43.281	24.14		0.912	0.851	0.664	0.84	0.939	0.604	0.936	0.942	0.945	0.891	0.923	0.897	0.923	0.88	1		1.449	1.534
298.391	212.467	189.033	314.014	271.833	428.059	217.154	181.222	204.656	103.109	182.784	465.553	228.09	251.524	223.403		65.35	56.083	52.548	65.654	59.618	79.491	53.28	50.78	52.548	37.549	49.316	81.991	62.118	51.816	55.654		0.878	0.849	0.86	0.915	0.961	0.851	0.961	0.883	0.931	0.919	0.944	0.87	0.743	0.885	0.906		1.572	1.854
145.29	267.146	196.844	184.346	206.218	267.146	181.222	209.343	268.708	134.354	348.383	206.218	271.833	137.479	318.7		48.709	62.85	54.316	52.851	52.245	62.422	50.048	53.583	62.547	42.245	85.83	55.351	66.386	56.815	80.401		0.77	0.85	0.838	0.829	0.949	0.862	0.909	0.916	0.863	0.946	0.594	0.846	0.775	0.979	0.62		2.043	1.551
164.037	535.854	195.282	173.411	162.475	615.53	239.025	223.403	189.033	128.105	246.837	232.776	192.158	160.913	434.307		47.548	85.223	81.562	48.584	47.548	92.294	56.815	54.316	51.513	40.478	57.851	56.083	50.048	42.549	110.88		0.912	0.927	0.369	0.923	0.903	0.908	0.931	0.952	0.895	0.983	0.927	0.93	0.964	0.954	0.444		1.661	1.33
274.957	149.977	199.969	154.664	257.773	362.444	192.158	399.938	253.086	185.909	146.852	181.222	210.905	129.667	149.977		65.654	48.281	51.816	47.245	59.922	83.33	50.78	90.223	57.851	50.048	45.781	52.548	54.316	45.781	44.745		0.802	0.809	0.936	0.871	0.902	0.656	0.936	0.617	0.95	0.933	0.88	0.825	0.898	0.965	0.941		1.776	2.007
270.27	201.531	153.101	162.475	289.018	301.516	226.527	167.162	165.599	329.636	254.648	21.872	248.399	131.23	176.535		66.386	51.084	49.619	49.013	64.921	64.618	57.851	46.816	47.548	66.689	62.118	18.408	61.386	44.316	50.78		0.771	0.97	0.781	0.85	0.862	0.907	0.851	0.958	0.92	0.931	0.829	0.811	0.828	0.83	0.86		2.069	1.232
198.406	274.957	173.411	170.286	179.66	185.909	199.969	134.354	217.154	137.479	142.165	210.905	231.214	232.776	189.033		52.851	60.654	52.119	47.852	50.048	50.351	54.316	43.281	53.583	43.281	47.852	54.619	60.351	43.281	50.78		0.893	0.939	0.802	0.935	0.901	0.921	0.852	0.901	0.95	0.922	0.78	0.888	0.798	0.88	0.921		1.282	1.167
182.784	214.029	407.749	196.844	415.561	207.78	165.599	232.776	245.274	165.599	198.407	512.421	164.037	240.588	429.62		51.816	53.583	76.992	51.513	79.92	54.619	46.513	56.083	57.548	47.548	50.048	92.294	46.084	65.35	80.527		0.856	0.937	0.864	0.932	0.818	0.875	0.962	0.93	0.931	0.92	0.995	0.756	0.971	0.685	0.833		1.695	1.434
135.916	231.214	243.712	167.162	206.218	235.901	246.837	374.942	237.463	234.339	371.817	173.411	249.961	178.097	296.829		44.316	56.815	57.548	50.351	52.851	57.851	57.548	71.689	57.119	58.154	71.385	47.548	60.654	57.119	63.886		0.87	0.9	0.925	0.829	0.928	0.886	0.937	0.917	0.915	0.871	0.917	0.964	0.854	0.927	0.914		1.952	1.487
121.856	190.595	243.712	207.78	187.471	229.652	174.973	343.697	207.78	153.101	171.848	237.463	178.097	178.097	185.908		41.513	50.78	61.689	53.28	51.816	57.422	52.245	69.921	53.28	45.049	50.351	62.118	50.351	52.245	50.048		0.889	0.929	0.805	0.92	0.877	0.875	0.806	0.883	0.92	0.948	0.852	0.773	0.883	0.82	0.933		1.683	1.292
276.519	190.595	218.716	184.346	267.146	251.524	168.724	337.448	348.383	179.66	176.535	114.045	242.15	206.218	24.996		65.35	50.78	55.351	49.745	62.85	57.851	50.351	71.385	70.35	48.584	49.316	40.478	60.957	49.013	22.676		0.814	0.929	0.897	0.936	0.85	0.944	0.836	0.832	0.885	0.956	0.912	0.875	0.819	0.932	0.611		1.817	1.609
121.856	249.961	178.097	173.411	306.203	278.082	309.327	373.38	168.724	137.479	196.844	201.531	235.901	209.343	149.977		41.513	60.351	50.78	51.816	65.35	61.386	64.618	72.724	48.281	42.245	51.084	55.351	56.815	51.513	45.049		0.889	0.862	0.868	0.812	0.901	0.927	0.931	0.887	0.91	0.968	0.948	0.827	0.918	0.977	0.929		1.32	1.721
148.414	154.664	267.146	185.909	192.158	223.403	218.716	198.407	264.022	168.724	153.101	221.841	365.568	196.844	151.539		48.584	46.513	65.35	51.084	50.048	58.583	55.351	51.816	59.618	47.548	45.049	54.316	69.921	53.583	46.084		0.79	0.898	0.786	0.895	0.964	0.818	0.897	0.929	0.933	0.938	0.948	0.945	0.94	0.916	0.897		2.204	1.438
145.29	170.286	260.897	228.09	240.588	346.821	196.844	20.309	160.913	245.274	159.35	282.769	256.21	165.599	312.451		47.245	48.281	86.562	56.083	56.815	74.063	51.816	17.373	75.098	59.922	46.816	94.365	58.583	54.012	65.35		0.818	0.918	0.438	0.911	0.937	0.795	0.921	0.846	0.359	0.858	0.914	0.399	0.938	0.848	0.919		2.046	1.387
187.471	185.909	198.407	253.086	426.496	443.681	193.72	260.897	221.841	159.35	281.206	267.146	256.21	264.022	318.7		50.048	51.209	56.387	59.618	76.992	79.188	50.78	59.315	57.119	46.816	67.118	63.154	57.851	46.816	65.654		0.941	0.891	0.784	0.895	0.904	0.889	0.944	0.932	0.854	0.914	0.784	0.842	0.962	0.949	0.929		1.435	1.671
179.659	176.535	273.395	167.162	251.524	20.309	276.52	290.58	146.852	143.728	168.724	473.364	212.467	135.916	215.591		49.316	55.654	90.704	48.281	58.583	15.605	72.421	63.154	45.049	42.978	47.852	81.259	54.316	61.083	59.19		0.928	0.716	0.418	0.901	0.921	1	0.663	0.916	0.909	0.978	0.926	0.901	0.905	0.889	0.773		1.361	1.782
206.218	143.728	523.356	189.033	643.65	242.15	142.165	1452.9	181.222	149.977	148.414	204.656	93.735	273.395	134.354		53.583	44.745	114.237	52.548	97.293	59.618	43.281	143.806	51.084	46.513	44.316	52.851	34.443	43.281	44.316		0.903	0.902	0.504	0.86	0.854	0.856	0.954	0.883	0.873	0.871	0.95	0.921	0.993	0.912	0.86		1.351	1.488
190.595	289.018	259.335	185.909	267.146	281.206	157.788	239.025	215.592	157.788	193.72	226.527	179.66	209.343	210.905		52.119	64.315	62.422	50.351	59.618	64.921	48.281	58.583	52.851	45.049	51.084	54.619	50.048	62.118	97.042		0.882	0.878	0.836	0.921	0.944	0.838	0.851	0.875	0.97	0.977	0.933	0.954	0.901	0.89	0.281		1.664	1.284
162.475	399.938	243.712	167.162	404.625	198.407	173.411	195.282	190.595	121.856	362.444	184.346	167.162	90.611	42.181		47.852	81.562	67.724	50.477	83.759	51.084	48.281	51.513	82.294	41.513	74.795	55.351	47.548	61.512	23.711		0.892	0.755	0.668	0.824	0.725	0.955	0.935	0.925	0.354	0.889	0.814	0.756	0.929	0.695	0.943		1.73	1.722
135.916	212.467	242.15	315.576	209.343	271.833	181.222	221.841	190.595	195.282	349.946	149.977	345.259	373.38	212.467		44.745	54.316	56.815	73.027	54.316	62.118	53.155	55.351	50.351	52.851	69.189	49.619	70.35	34.443	53.887		0.853	0.905	0.943	0.744	0.892	0.885	0.806	0.91	0.945	0.879	0.919	0.765	0.877	0.96	0.919		1.572	1.5
168.724	60.928	218.716	178.097	217.154	267.146	201.531	579.598	149.977	118.732	168.724	153.101	148.414	290.58	201.531		50.78	28.408	54.619	51.387	56.083	61.386	52.548	92.597	46.816	40.478	49.316	50.048	44.013	71.385	57.851		0.822	0.949	0.921	0.848	0.868	0.891	0.917	0.849	0.86	0.911	0.872	0.768	0.963	0.921	0.757		1.948	1.284
159.35	215.592	568.662	160.913	315.576	706.141	170.286	243.712	487.424	121.856	148.414	168.724	279.644	164.037	348.383		46.816	53.583	130.146	47.245	67.724	100.096	48.281	57.548	94.365	40.478	46.816	48.281	63.886	63.886	68.153		0.914	0.944	0.422	0.906	0.865	0.886	0.918	0.925	0.688	0.935	0.851	0.91	0.861	0.895	0.943		1.501	1.325
221.84	257.773	223.403	418.685	279.644	218.716	151.539	345.259	128.105	128.105	948.291	148.414	242.15	279.644	45.305		55.351	57.851	59.19	76.992	61.386	55.048	48.584	70.956	44.316	41.513	128.807	44.013	57.119	45.781	32.246		0.91	0.968	0.801	0.888	0.933	0.907	0.807	0.862	0.82	0.934	0.718	0.963	0.933	0.984	0.548		1.466	1.082
249.961	214.029	107.796	223.403	362.444	354.633	217.154	251.524	224.965	135.916	198.407	40.619	468.677	284.331	164.037		57.851	53.583	83.33	58.583	71.689	86.562	54.619	58.583	56.083	44.013	51.816	24.444	84.794	61.083	58.886		0.939	0.937	0.195	0.818	0.886	0.595	0.915	0.921	0.899	0.882	0.929	0.854	0.819	0.942	0.594		1.457	1.283
184.346	231.214	145.29	273.395	335.885	293.704	173.411	212.467	174.973	167.162	164.037	399.938	223.403	204.656	276.52		52.119	56.387	52.119	63.583	69.492	63.886	50.655	53.583	53.583	45.781	48.281	73.885	55.351	62.422	61.689		0.853	0.914	0.672	0.85	0.874	0.904	0.849	0.93	0.766	1	0.884	0.921	0.916	0.917	0.913		1.906	1.486
210.905	348.383	139.041	173.411	206.218	318.701	162.475	218.716	268.708	201.531	357.757	28.121	240.588	342.134	220.278		57.244	69.492	50.351	49.013	51.816	67.421	46.084	57.119	62.118	53.583	73.153	24.444	58.28	51.816	54.316		0.809	0.907	0.689	0.907	0.965	0.881	0.961	0.842	0.875	0.882	0.84	0.591	0.89	0.958	0.938		2.029	1.344
179.659	221.841	251.524	189.033	304.64	279.644	160.913	278.082	201.531	245.274	170.286	126.543	142.165	209.343	28.121		49.316	55.351	71.26	53.28	64.618	63.154	45.049	63.154	53.583	58.886	47.548	40.478	44.013	69.189	35.049		0.928	0.91	0.622	0.837	0.917	0.881	0.996	0.876	0.882	0.889	0.946	0.971	0.922	0.898	0.288		1.486	1.231
174.973	187.471	267.146	187.471	276.52	254.648	231.214	220.278	262.459	131.23	215.592	26.558	246.837	204.656	103.109		49.316	51.513	67.724	49.745	64.618	66.992	58.28	57.119	60.654	40.478	54.619	17.373	59.618	55.048	53.458		0.904	0.888	0.732	0.952	0.832	0.713	0.855	0.848	0.897	1	0.908	1	0.873	0.868	0.453		1.42	1.467
160.912	210.905	251.524	153.101	201.531	274.957	289.018	239.025	223.403	135.916	129.667	195.282	153.101	237.463	103.109		48.584	55.78	58.886	45.781	52.548	63.886	64.618	57.851	55.78	43.71	41.513	50.048	44.745	52.548	36.21		0.857	0.852	0.912	0.918	0.917	0.847	0.87	0.897	0.902	0.894	0.946	0.98	0.961	0.931	0.988		1.957	1.819
199.969	254.648	162.475	173.411	289.018	279.644	184.346	215.592	223.403	242.15	184.346	159.35	217.154	207.78	96.86		52.548	59.618	47.548	50.78	63.886	60.654	52.548	54.316	58.28	60.654	50.048	47.245	53.28	56.387	37.549		0.91	0.9	0.903	0.845	0.89	0.955	0.839	0.918	0.827	0.827	0.925	0.897	0.961	0.939	0.863		1.349	1.551
314.013	318.701	390.564	254.648	217.154	245.274	167.162	518.67	226.527	142.165	357.757	112.483	465.553	162.475	43.743		73.456	66.689	73.885	61.083	54.316	61.386	47.548	101.435	54.619	45.352	69.921	39.013	82.723	52.548	23.408		0.731	0.901	0.899	0.858	0.925	0.818	0.929	0.633	0.954	0.869	0.92	0.929	0.855	0.946	1		1.471	1.356
265.584	210.905	146.852	9.374	292.142	317.138	290.58	221.841	260.897	154.664	132.792	195.282	292.142	157.788	140.603		61.386	53.28	49.619	10.606	63.583	90.704	63.154	55.654	64.921	45.781	41.513	52.119	64.921	45.781	45.477		0.886	0.934	0.75	1	0.908	0.484	0.916	0.9	0.778	0.927	0.968	0.903	0.871	0.974	0.854		1.292	1.427
199.969	260.897	187.471	176.535	184.346	234.339	237.463	193.72	237.463	196.844	301.516	451.493	203.094	184.346	128.105		57.548	61.386	52.548	48.281	51.084	55.048	57.851	52.119	57.119	50.477	67.118	80.223	51.084	44.745	40.478		0.759	0.87	0.853	0.952	0.888	0.972	0.892	0.896	0.915	0.971	0.841	0.882	0.978	0.99	0.983		2.088	1.519
206.218	235.901	243.712	142.165	239.025	214.029	232.776	315.576	92.173	129.667	298.391	112.483	160.913	185.909	276.52		53.887	57.851	58.886	46.387	57.851	55.654	55.048	65.35	112.126	41.513	76.688	39.746	48.584	50.048	64.921		0.892	0.886	0.883	0.83	0.897	0.868	0.965	0.929	0.092	0.946	0.638	0.895	0.857	0.925	0.824		1.657	1.452
162.475	518.67	195.282	232.776	296.829	335.885	195.282	212.467	207.78	132.792	164.037	160.913	171.848	171.848	164.037		48.28	83.759	57.244	56.083	63.583	66.689	51.084	54.619	58.583	41.513	48.887	47.852	48.281	49.316	47.548		0.876	0.929	0.749	0.93	0.923	0.949	0.94	0.895	0.761	0.968	0.863	0.883	0.926	0.961	0.912		1.751	1.283
228.089	354.633	214.029	190.595	184.346	264.022	246.837	299.954	332.761	143.728	217.154	167.162	231.214	159.35	21.872		58.583	69.189	54.316	51.084	51.084	59.922	57.851	65.654	78.456	43.281	52.851	49.316	57.851	47.977	18.408		0.835	0.931	0.912	0.918	0.888	0.924	0.927	0.874	0.679	0.964	0.977	0.864	0.868	0.938	0.811		1.76	1.333
143.728	215.592	223.403	192.158	334.323	673.333	156.226	579.598	270.271	198.407	304.64	168.724	221.841	90.611	538.979		45.049	53.28	57.119	50.351	66.386	109.541	47.548	90.097	69.492	51.084	91.133	49.316	53.583	46.816	133.378		0.89	0.954	0.86	0.952	0.953	0.705	0.868	0.897	0.703	0.955	0.461	0.872	0.971	0.914	0.381		1.677	1.149
176.535	224.965	199.969	276.52	267.146	435.87	162.475	257.773	498.36	223.403	253.086	314.014	187.471	204.656	87.486		48.28	55.351	51.387	61.083	61.083	83.759	48.887	57.851	87.116	54.316	58.886	66.815	51.084	37.246	58.154		0.952	0.923	0.952	0.931	0.9	0.781	0.854	0.968	0.825	0.952	0.917	0.884	0.903	0.821	0.325		1.39	1.017
192.157	524.919	292.142	160.913	196.844	281.206	149.977	201.531	145.29	217.154	224.965	143.728	165.599	339.01	71.864		50.048	89.794	64.921	50.78	50.78	70.956	46.084	51.816	131.727	56.083	55.351	43.281	47.548	53.28	74.063		0.964	0.818	0.871	0.784	0.959	0.702	0.887	0.943	0.105	0.868	0.923	0.964	0.92	0.906	0.165		1.263	1.816
146.852	192.158	237.463	221.841	256.21	210.905	182.784	474.926	424.934	174.973	199.969	126.543	174.973	115.607	212.467		49.316	50.78	58.886	55.351	58.583	55.351	49.316	80.956	76.688	55.654	53.583	39.746	48.281	68.886	104.845		0.759	0.936	0.861	0.91	0.938	0.865	0.944	0.911	0.908	0.71	0.875	1	0.943	0.898	0.243		2.211	1.354
240.587	196.844	478.051	346.821	189.033	70.302	210.905	185.909	173.411	151.539	159.35	20.309	185.909	126.543	228.09		58.583	54.619	80.223	74.492	50.048	29.746	58.583	51.084	66.563	45.049	45.781	14.873	49.013	39.746	115.754		0.881	0.829	0.933	0.785	0.948	0.998	0.772	0.895	0.492	0.938	0.955	1	0.973	0.92	0.214		1.573	1.621
217.154	274.957	281.206	235.901	198.407	187.471	160.913	251.524	426.496	140.603	104.671	185.909	162.475	85.924	23.434		56.815	59.618	62.85	57.851	52.851	52.851	47.852	58.583	76.688	45.352	37.978	49.316	46.816	42.549	21.944		0.845	0.972	0.895	0.886	0.893	0.843	0.883	0.921	0.911	0.859	0.912	0.961	0.932	0.878	0.612		1.782	1.136
140.603	231.214	204.656	195.282	210.905	206.218	203.094	298.391	240.588	162.475	151.539	157.788	243.712	217.154	106.234		45.781	56.083	54.922	53.583	53.28	53.28	53.583	63.154	60.351	46.513	50.351	47.548	56.815	35.478	46.513		0.843	0.924	0.853	0.855	0.934	0.913	0.889	0.94	0.83	0.944	0.751	0.877	0.949	0.858	0.617		1.533	1.314
140.603	23.434	179.66	140.603	242.15	310.889	206.218	215.592	431.183	157.788	229.652	115.607	176.535	156.226	34.37		46.21	16.338	49.745	44.316	57.851	68.457	52.548	53.28	78.759	45.781	54.619	40.478	48.584	56.815	31.514		0.827	1	0.912	0.9	0.909	0.834	0.938	0.954	0.874	0.946	0.967	0.887	0.94	0.845	0.435		1.865	1.137
203.093	264.022	331.199	196.844	189.033	235.901	156.226	289.018	323.387	137.479	176.535	440.557	137.479	78.113	312.452		54.619	61.386	68.457	55.78	51.084	59.012	47.548	62.547	64.618	43.281	49.316	80.956	43.281	46.816	98.935		0.856	0.88	0.888	0.795	0.91	0.851	0.868	0.928	0.973	0.922	0.912	0.845	0.922	0.896	0.401		1.499	1.276
151.539	182.784	189.033	174.973	139.041	151.539	143.728	318.701	153.101	148.414	246.837	115.607	342.134	204.656	413.998		46.816	50.048	51.084	50.78	53.28	46.513	50.048	67.118	49.745	45.781	57.548	38.281	72.421	32.246	154.161		0.869	0.917	0.91	0.853	0.615	0.88	0.721	0.889	0.777	0.89	0.937	0.991	0.82	0.944	0.219		1.716	1.466
284.331	165.599	160.913	164.037	212.467	323.387	242.15	493.673	164.037	126.543	137.479	282.769	243.712	117.169	20.309		65.225	47.548	46.513	47.548	54.316	68.153	60.047	85.223	46.816	41.513	45.781	67.724	58.886	55.048	32.246		0.84	0.92	0.935	0.912	0.905	0.875	0.844	0.854	0.941	0.923	0.824	0.775	0.883	0.849	0.245		1.814	1.204
142.165	323.387	195.282	159.35	287.455	378.066	284.331	209.343	235.901	140.603	203.094	157.788	289.018	218.716	787.378		46.387	68.279	53.887	47.548	64.315	75.956	62.422	54.012	56.083	44.013	52.548	46.816	62.85	39.746	193.049		0.83	0.872	0.845	0.886	0.873	0.823	0.917	0.902	0.942	0.912	0.924	0.905	0.919	0.932	0.265		1.922	1.484
173.41	220.278	201.531	293.704	228.09	457.742	153.101	243.712	204.656	160.913	235.901	164.037	264.022	118.732	487.424		48.28	57.422	54.619	63.886	56.083	80.223	46.513	57.851	53.28	46.816	57.119	49.013	60.654	55.048	124.414		0.935	0.84	0.849	0.904	0.911	0.894	0.889	0.915	0.906	0.923	0.909	0.858	0.902	0.907	0.396		1.4	1.65
231.214	410.874	199.969	174.973	223.403	393.689	209.343	282.769	193.72	117.169	187.471	426.496	298.391	184.346	32.807		60.047	94.793	51.816	48.281	55.351	76.259	55.654	66.992	51.084	38.71	49.316	75.956	64.618	41.513	52.422		0.806	0.575	0.936	0.943	0.916	0.851	0.849	0.792	0.933	0.983	0.969	0.929	0.898	0.866	0.15		1.851	1.982
142.165	178.097	195.282	157.788	237.463	145.29	199.969	209.343	228.09	143.728	253.086	120.294	118.732	120.294	223.403		46.816	49.013	55.351	48.584	57.422	48.887	52.548	54.619	56.083	42.978	59.618	40.049	39.013	49.013	98.935		0.815	0.932	0.801	0.84	0.905	0.764	0.91	0.882	0.911	0.978	0.895	0.942	0.98	0.964	0.287		1.884	1.142
178.097	209.343	301.516	171.848	520.232	179.66	229.652	173.411	198.407	154.664	121.856	164.037	406.187	126.543	26.558		49.316	52.851	65.225	49.316	88.026	49.013	58.583	51.084	51.084	45.781	44.013	48.281	78.153	40.781	42.12		0.92	0.942	0.891	0.888	0.844	0.94	0.841	0.835	0.955	0.927	0.79	0.884	0.836	0.909	0.188		1.369	1.288
184.346	192.158	139.041	179.66	212.467	156.226	215.592	226.527	359.319	142.165	203.094	209.343	229.652	149.977	537.417		50.78	54.316	44.013	51.084	53.583	45.781	55.048	55.351	93.026	44.745	53.887	55.351	55.048	41.513	214.26		0.898	0.818	0.902	0.865	0.93	0.937	0.894	0.929	0.522	0.892	0.879	0.859	0.952	0.923	0.147		1.453	1.813
174.973	187.471	226.527	192.158	209.343	43.743	348.383	178.097	218.716	135.916	548.353	254.648	206.218	68.739	26.558		48.584	49.316	112.344	53.583	56.815	24.14	70.35	51.084	54.619	42.245	102.899	75.098	52.548	44.013	44.316		0.932	0.969	0.226	0.841	0.815	0.943	0.885	0.858	0.921	0.957	0.651	0.567	0.938	0.973	0.17		1.323	1.162
143.728	195.282	220.278	276.52	215.592	445.243	278.082	182.784	198.407	126.543	267.146	151.539	182.784	118.732	29.683		44.013	54.012	57.851	61.689	54.619	98.632	68.457	54.619	56.69	40.781	63.583	45.781	49.619	30.175	55.958		0.932	0.841	0.827	0.913	0.908	0.575	0.746	0.77	0.776	0.956	0.83	0.909	0.933	0.949	0.119		1.433	1.845
162.475	196.844	209.343	190.595	192.158	195.282	146.852	223.403	256.21	170.286	157.788	160.913	193.72	124.981	21.872		49.013	51.084	53.583	52.548	52.548	52.245	45.781	54.619	60.351	49.013	51.084	47.245	53.28	42.245	29.746		0.85	0.948	0.916	0.867	0.874	0.899	0.88	0.941	0.884	0.891	0.76	0.906	0.858	0.836	0.311		1.846	1.236
135.916	185.909	170.286	179.66	199.969	129.667	182.784	246.837	270.271	151.539	181.222	203.094	195.282	196.844	20.309		45.049	49.013	50.351	51.084	53.28	43.281	49.316	58.583	65.957	45.781	50.351	52.119	51.816	41.513	36.514		0.842	0.973	0.844	0.865	0.885	0.87	0.944	0.904	0.781	0.909	0.898	0.94	0.914	0.911	0.191		1.923	1.199
148.414	215.592	157.788	260.897	540.541	264.022	251.524	245.274	223.403	270.271	167.162	289.018	256.21	214.029	398.376		45.781	55.351	46.816	61.689	90.223	64.189	60.047	58.154	54.316	66.689	48.887	66.386	63.457	61.083	133.252		0.89	0.884	0.905	0.862	0.834	0.805	0.877	0.911	0.952	0.764	0.879	0.824	0.8	0.663	0.282		1.521	1.474
226.527	187.471	242.15	159.35	282.769	688.956	165.599	353.07	256.21	139.041	93.735	159.35	215.592	237.463	46.868		58.154	54.012	61.815	45.781	62.118	106.257	48.584	69.189	62.547	43.584	34.746	46.513	55.351	62.85	36.514		0.842	0.808	0.796	0.955	0.921	0.767	0.882	0.927	0.823	0.92	0.976	0.926	0.884	0.681	0.442		1.44	2.021
207.78	248.399	131.23	201.531	262.459	756.133	181.222	259.335	224.965	137.479	271.833	429.621	149.977	234.339	334.323		54.619	59.618	77.169	53.583	61.386	173.553	51.816	63.154	56.815	42.549	59.618	78.456	44.013	56.387	162.873		0.875	0.878	0.277	0.882	0.875	0.315	0.848	0.817	0.876	0.954	0.961	0.877	0.973	0.939	0.158		1.675	1.498
185.908	190.595	115.607	170.286	274.957	512.421	170.286	274.957	271.833	264.022	199.969	234.339	253.086	249.961	39.056		50.048	51.084	52.119	48.281	60.351	88.329	49.316	61.689	68.457	64.315	51.816	107.428	61.083	81.991	27.979		0.933	0.918	0.535	0.918	0.949	0.825	0.88	0.908	0.729	0.802	0.936	0.255	0.852	0.438	0.627		1.459	1.551
218.716	384.315	128.105	170.286	164.037	93.735	149.977	303.078	29.683	160.913	187.471	249.961	228.09	373.38	292.142		54.619	85.097	54.19	52.119	46.513	37.978	46.942	66.689	18.408	46.816	49.316	60.654	56.083	60.351	160.802		0.921	0.667	0.548	0.788	0.953	0.817	0.855	0.856	1	0.923	0.969	0.854	0.911	0.862	0.142		1.26	1.763
193.72	176.535	254.648	312.452	204.656	21.872	176.535	209.343	187.471	231.214	192.158	434.308	321.825	171.848	229.652		55.048	49.316	65.225	65.654	53.583	16.641	50.048	54.316	52.548	58.583	52.548	80.223	70.224	80.527	94.239		0.803	0.912	0.752	0.911	0.896	0.993	0.886	0.892	0.853	0.847	0.874	0.848	0.82	0.724	0.325		2.035	1.707
254.648	774.88	257.773	189.033	146.852	242.15	192.158	218.716	307.765	139.041	176.535	192.158	271.833	199.969	185.909		59.618	112.166	68.76	52.548	44.745	76.992	52.245	54.316	68.457	43.281	51.816	53.887	65.957	47.548	99.542		0.9	0.774	0.685	0.86	0.922	0.513	0.885	0.932	0.825	0.933	0.826	0.832	0.785	0.955	0.236		1.496	1.466
184.346	292.142	251.524	170.286	296.829	435.87	23.434	467.115	310.889	137.479	110.92	206.218	220.278	167.162	181.222		52.977	63.886	59.618	49.316	64.618	106.864	18.837	101.132	67.724	43.281	40.478	53.583	53.28	52.548	114.844		0.825	0.899	0.889	0.88	0.893	0.48	0.83	0.574	0.852	0.922	0.851	0.903	0.975	0.91	0.173		1.736	1.297
190.595	209.343	531.168	182.784	323.387	362.444	196.844	262.459	246.837	148.414	178.097	193.72	226.527	190.595	474.926		51.084	54.619	88.455	50.048	66.386	71.992	55.351	60.351	58.886	45.049	49.316	52.851	58.154	48.281	175.069		0.918	0.882	0.853	0.917	0.922	0.879	0.807	0.906	0.895	0.919	0.92	0.872	0.842	0.901	0.195		1.595	1.393
195.282	203.094	149.977	181.222	218.716	335.885	231.214	353.07	298.391	139.041	168.724	210.905	193.72	89.049	21.872		56.993	52.548	50.351	50.78	56.083	70.224	56.083	70.956	64.921	43.281	46.816	53.583	53.28	54.316	45.655		0.755	0.924	0.743	0.883	0.874	0.856	0.924	0.881	0.89	0.933	0.967	0.923	0.858	0.812	0.132		2.029	1.43
335.885	201.531	387.44	154.664	146.852	273.395	170.286	196.844	279.644	121.856	251.524	164.037	170.286	154.664	507.734		69.921	52.851	72.85	46.513	45.049	62.85	47.548	53.583	63.886	41.513	60.351	53.28	48.281	37.978	181.711		0.863	0.907	0.917	0.898	0.909	0.87	0.946	0.862	0.861	0.889	0.868	0.726	0.918	0.776	0.193		1.621	1.449
193.72	210.905	209.343	237.463	337.448	198.407	220.278	237.463	301.516	145.29	253.086	382.753	262.459	253.086	320.263		51.816	53.583	55.048	57.851	67.421	53.887	54.316	56.083	68.886	44.013	58.886	75.956	59.618	44.745	168.302		0.907	0.923	0.868	0.892	0.933	0.859	0.938	0.949	0.798	0.943	0.917	0.834	0.928	0.971	0.142		1.543	1.27
210.905	274.957	206.218	184.346	132.792	554.602	185.909	260.897	178.097	156.226	248.399	151.539	178.097	220.278	60.928		56.083	60.654	55.048	51.513	42.549	87.723	50.78	59.618	47.548	46.816	57.119	45.477	48.584	60.351	40.049		0.843	0.939	0.855	0.873	0.922	0.906	0.906	0.922	0.99	0.896	0.957	0.921	0.948	0.873	0.477		1.561	1.154
435.869	351.508	179.66	210.905	201.531	240.588	189.033	218.716	240.588	135.916	220.278	134.354	145.29	120.294	39.056		83.027	80.527	51.513	54.012	51.816	59.618	50.048	56.387	56.083	42.245	54.316	42.245	45.049	57.422	38.585		0.795	0.681	0.851	0.908	0.943	0.851	0.948	0.864	0.961	0.957	0.938	0.946	0.9	0.84	0.33		1.537	1.472
426.496	221.841	184.346	245.274	296.829	242.15	160.913	287.455	232.776	170.286	218.716	231.214	176.535	256.21	204.656		78.759	54.316	62.118	57.851	63.886	57.119	46.816	63.154	55.048	46.816	56.083	55.351	52.851	39.746	103.077		0.864	0.945	0.6	0.921	0.914	0.933	0.923	0.906	0.965	0.976	0.874	0.948	0.794	0.957	0.242		1.374	1.271
218.716	249.961	265.584	199.969	182.784	287.455	221.841	265.584	503.047	140.603	139.041	137.479	229.652	626.465	307.765		57.119	57.851	68.457	51.816	48.584	62.118	57.422	59.618	145.526	42.978	43.281	101.764	55.351	61.386	152.822		0.842	0.939	0.712	0.936	0.973	0.936	0.845	0.939	0.298	0.957	0.933	0.167	0.942	0.854	0.166		1.525	1.288
204.656	245.274	206.218	179.66	270.271	176.535	284.331	328.074	307.765	153.101	251.524	203.094	149.977	271.833	26.558		56.386	57.548	53.583	49.013	59.315	49.316	62.118	68.153	94.668	45.781	58.886	53.887	44.316	140.145	39.013		0.809	0.931	0.903	0.94	0.965	0.912	0.926	0.888	0.432	0.918	0.912	0.879	0.96	0.401	0.219		1.814	1.325
340.572	846.744	190.595	204.656	248.399	198.407	153.101	354.633	209.343	159.35	237.463	168.724	312.452	82.8	40.619		68.457	112.595	50.351	53.583	56.815	50.78	47.548	71.385	53.583	45.781	56.387	49.316	70.956	62.422	38.585		0.913	0.839	0.945	0.896	0.967	0.967	0.851	0.875	0.916	0.955	0.939	0.872	0.78	0.877	0.343		1.227	1.578
553.039	410.874	218.716	248.399	420.247	329.636	218.716	143.728	257.773	164.037	159.35	245.274	264.022	101.547	120.294		116.005	79.491	57.851	59.618	75.653	71.992	52.548	47.119	71.26	46.513	46.084	58.583	65.225	34.443	92.042		0.516	0.817	0.821	0.878	0.923	0.799	0.995	0.813	0.638	0.953	0.943	0.898	0.78	0.877	0.178		1.794	1.249
346.821	328.074	226.527	206.218	249.961	367.131	176.535	348.383	209.343	148.414	151.539	124.981	209.343	462.428	292.142		71.689	67.421	54.316	53.583	60.351	73.027	50.048	68.886	56.69	44.745	46.084	42.978	52.851	38.71	118.254		0.848	0.907	0.965	0.903	0.862	0.865	0.886	0.923	0.819	0.932	0.897	0.85	0.942	0.852	0.263		1.182	1.321
210.905	259.335	232.776	229.652	212.467	199.969	176.535	223.403	574.911	118.732	189.033	340.572	226.527	95.298	298.391		51.816	59.315	56.083	56.083	55.351	51.084	50.048	57.851	144.287	39.013	50.048	69.921	56.387	81.991	158.554		0.987	0.926	0.93	0.918	0.871	0.963	0.886	0.839	0.347	0.98	0.948	0.875	0.895	0.864	0.149		1.269	1.418
224.965	181.222	470.24	176.535	226.527	328.074	148.414	253.086	249.961	156.226	184.346	178.097	190.595	259.335	567.1		56.083	50.351	79.491	50.351	56.083	67.85	45.049	59.618	64.189	46.513	51.084	49.619	53.583	35.175	197.013		0.899	0.898	0.935	0.875	0.905	0.896	0.919	0.895	0.762	0.907	0.888	0.909	0.834	0.968	0.184		1.402	1.633
276.519	167.162	243.712	323.387	168.724	196.844	301.516	153.101	173.411	192.158	184.346	106.234	168.724	304.64	193.72		63.886	50.048	65.225	69.921	48.709	50.78	67.118	46.816	48.281	50.048	53.28	41.21	46.816	59.315	91.436		0.851	0.839	0.72	0.831	0.894	0.959	0.841	0.878	0.935	0.964	0.816	0.786	0.967	0.926	0.291		1.524	1.801
182.784	178.097	176.535	192.158	265.584	257.773	201.531	239.025	199.969	85.924	154.664	370.255	262.459	104.671	315.576		51.084	52.851	51.816	50.78	63.279	59.618	52.548	56.815	55.048	33.711	45.352	81.865	60.654	65.654	157.089		0.88	0.801	0.826	0.936	0.833	0.911	0.917	0.931	0.829	0.95	0.945	0.694	0.897	0.888	0.161		1.574	1.655
307.764	460.866	315.576	193.72	259.335	223.403	218.716	307.765	160.913	131.23	149.977	314.014	174.973	221.841	507.734		65.35	82.723	69.492	52.119	60.654	57.119	55.351	64.189	46.513	41.513	44.316	71.563	48.281	37.246	271.985		0.906	0.846	0.821	0.896	0.886	0.86	0.897	0.939	0.935	0.957	0.96	0.771	0.943	0.948	0.086		1.32	1.531
251.523	212.467	189.033	235.901	203.094	196.844	148.414	249.961	526.481	173.411	165.599	192.158	153.101	128.105	48.43		59.618	52.851	51.387	56.083	51.084	52.548	44.745	60.351	103.203	49.316	46.816	51.816	46.084	60.351	29.746		0.889	0.956	0.9	0.942	0.978	0.896	0.932	0.862	0.621	0.896	0.949	0.899	0.906	0.765	0.688		1.427	1.117
195.282	160.913	195.282	184.346	306.203	264.022	167.162	176.535	234.339	139.041	131.23	220.278	173.411	104.671	62.49		52.851	48.281	52.851	50.048	64.921	63.154	48.281	49.619	56.083	43.281	44.013	56.083	52.422	41.513	52.119		0.879	0.867	0.879	0.925	0.913	0.832	0.901	0.901	0.936	0.933	0.851	0.88	0.793	0.934	0.289		1.601	1.435
334.323	168.724	306.203	335.885	167.162	204.656	228.09	187.471	224.965	139.041	204.656	21.872	228.09	207.78	248.399		73.153	48.584	69.921	67.118	46.513	52.851	55.78	54.619	55.351	43.281	51.816	16.641	55.351	42.549	106.612		0.785	0.898	0.787	0.937	0.971	0.921	0.921	0.79	0.923	0.933	0.958	0.993	0.936	0.727	0.275		1.803	1.582
220.278	196.844	195.282	203.094	160.913	232.776	289.018	243.712	217.154	129.667	182.784	203.094	153.101	131.23	146.852		54.619	54.012	55.351	55.351	46.084	57.119	67.118	60.047	61.083	41.513	50.78	51.816	45.049	53.887	94.542		0.928	0.848	0.801	0.833	0.952	0.897	0.806	0.849	0.731	0.946	0.891	0.951	0.948	0.899	0.206		1.395	1.545
287.455	210.905	262.459	217.154	170.286	195.282	145.29	195.282	160.913	246.837	189.033	160.913	156.226	82.8	512.421		62.85	55.351	68.028	55.048	46.513	52.119	46.513	52.119	51.084	62.118	50.048	54.012	45.049	43.584	183.907		0.914	0.865	0.713	0.901	0.989	0.903	0.844	0.903	0.775	0.804	0.948	0.693	0.967	0.868	0.19		1.338	1.331
203.093	137.479	134.354	267.146	174.973	282.769	185.909	201.531	139.041	137.479	179.66	368.693	159.35	84.362	87.486		56.083	44.316	42.978	61.815	49.316	67.724	50.048	52.548	50.048	43.281	48.281	80.527	45.477	32.978	69.492		0.811	0.88	0.914	0.879	0.904	0.775	0.933	0.917	0.698	0.922	0.969	0.714	0.968	0.957	0.228		1.898	1.589
206.218	162.475	284.331	231.214	320.263	193.72	173.411	210.905	214.029	117.169	168.724	145.29	295.267	176.535	128.105		56.083	46.084	70.831	57.851	68.153	56.083	47.245	54.619	55.048	39.013	50.048	45.781	65.654	33.711	81.133		0.824	0.961	0.712	0.868	0.866	0.774	0.976	0.888	0.888	0.967	0.846	0.871	0.861	0.933	0.245		1.524	1.168
370.255	179.66	332.761	242.15	231.214	248.399	264.022	181.222	406.187	146.852	206.218	126.543	214.029	189.033	376.504		72.724	51.816	82.169	57.119	56.083	60.351	59.618	50.048	78.456	44.013	51.816	40.781	55.048	50.048	228.527		0.88	0.841	0.619	0.933	0.924	0.857	0.933	0.909	0.829	0.953	0.965	0.956	0.888	0.886	0.091		1.405	1.652
396.813	171.848	178.097	148.414	229.652	151.539	242.15	204.656	179.66	62.49	143.728	462.428	157.788	184.346	445.243		75.224	48.281	52.851	44.013	56.083	46.513	57.851	53.583	49.745	39.746	44.745	83.33	46.084	50.78	184.21		0.881	0.926	0.801	0.963	0.918	0.88	0.909	0.896	0.912	0.497	0.902	0.837	0.934	0.921	0.165		1.449	1.185
221.84	607.718	579.598	351.508	293.704	164.037	220.278	179.66	207.78	148.414	173.411	232.776	135.916	214.029	335.885		56.815	99.061	100.703	69.618	62.85	48.584	54.619	49.619	105.88	45.352	53.583	55.048	42.245	50.048	182.443		0.864	0.778	0.718	0.911	0.934	0.873	0.928	0.917	0.233	0.907	0.759	0.965	0.957	0.925	0.127		1.614	1.707
204.656	304.64	168.724	168.724	160.913	179.66	207.78	187.471	220.278	137.479	174.973	254.648	318.701	117.169	432.745		53.583	69.618	50.048	48.584	47.548	56.083	52.851	52.548	55.351	43.281	48.281	61.386	69.921	56.815	169.337		0.896	0.79	0.846	0.898	0.894	0.718	0.935	0.853	0.904	0.922	0.943	0.849	0.819	0.833	0.19		1.435	1.721
334.323	43.743	164.037	167.162	235.901	274.957	164.037	287.455	201.531	142.165	324.95	249.961	276.52	109.358	65.615		75.956	23.408	48.281	48.281	56.083	60.351	49.316	63.886	117.04	43.584	66.082	57.548	62.118	41.513	45.352		0.728	1	0.884	0.901	0.942	0.949	0.848	0.885	0.185	0.94	0.935	0.948	0.901	0.854	0.401		1.597	1.582
512.42	237.463	156.226	214.029	245.274	181.222	143.728	203.094	324.95	121.856	174.973	588.971	156.226	182.784	162.475		106.006	57.548	46.21	55.048	58.583	49.316	44.013	51.816	70.956	41.817	48.584	92.597	47.245	40.049	78.937		0.573	0.901	0.919	0.888	0.898	0.936	0.932	0.951	0.811	0.876	0.932	0.863	0.88	0.857	0.328		2.365	1.22
220.278	156.226	140.603	304.64	249.961	229.652	146.852	240.588	153.101	128.105	173.411	145.29	51.555	304.64	246.837		56.386	47.548	49.19	65.35	58.583	58.886	46.513	56.083	47.548	40.781	49.316	44.316	25.908	50.351	132.52		0.871	0.868	0.73	0.896	0.915	0.832	0.853	0.961	0.851	0.968	0.896	0.93	0.965	0.906	0.177		1.625	1.738
170.286	320.263	181.222	196.844	259.335	378.066	173.411	292.142	231.214	117.169	228.09	23.434	107.796	270.271	378.066		49.619	67.118	73.027	53.887	60.654	71.689	50.048	66.082	65.225	39.746	56.815	19.141	39.013	73.456	151.964		0.869	0.893	0.427	0.852	0.886	0.924	0.87	0.841	0.683	0.932	0.888	0.804	0.89	0.709	0.206		1.504	1.49
199.969	520.232	106.234	187.471	553.039	399.938	195.282	376.504	360.882	259.335	206.218	131.23	21.872	465.553	95.298		53.887	85.526	47.852	50.78	85.955	75.224	51.816	83.027	70.653	58.583	52.548	42.245	17.373	62.85	75.098		0.865	0.894	0.583	0.914	0.941	0.888	0.914	0.686	0.908	0.95	0.938	0.924	0.911	0.86	0.212		1.438	1.138
174.973	190.595	235.901	157.788	242.15	167.162	168.724	312.452	132.792	132.792	160.913	274.957	65.615	164.037	356.195		47.548	52.119	66.563	49.013	57.548	48.584	47.548	67.421	42.549	42.549	46.513	61.386	33.407	88.455	142.394		0.973	0.882	0.669	0.825	0.919	0.89	0.938	0.864	0.922	0.922	0.935	0.917	0.739	0.748	0.221		1.371	1.638
170.286	179.66	214.029	151.539	228.09	185.909	128.105	293.704	264.022	149.977	151.539	178.097	271.833	185.909	542.103		50.048	50.048	57.422	44.745	55.351	50.351	42.978	64.189	62.85	46.513	44.013	48.281	63.886	49.619	242.668		0.854	0.901	0.816	0.951	0.936	0.921	0.872	0.896	0.84	0.871	0.983	0.96	0.837	0.837	0.116		1.527	1.627
214.029	293.704	151.539	131.23	234.339	699.892	171.848	310.889	251.524	139.041	178.097	240.588	187.471	176.535	179.66		54.316	63.154	51.387	41.513	57.548	112.595	49.316	64.921	64.189	44.013	49.316	60.351	50.048	52.548	116.612		0.912	0.925	0.721	0.957	0.889	0.694	0.888	0.927	0.767	0.902	0.92	0.83	0.941	0.846	0.166		1.385	1.083
3.125	223.403	554.602	185.909	201.531	249.961	174.973	232.776	617.092	131.23	174.973	303.078	96.86	74.988	451.493		6.035	55.654	96.864	52.119	51.513	59.315	48.584	56.815	93.758	41.513	50.048	65.225	35.478	51.084	198.048		1	0.906	0.743	0.86	0.954	0.893	0.932	0.906	0.882	0.957	0.878	0.895	0.967	0.85	0.145		2	1.171
234.338	335.885	153.101	164.037	235.901	307.765	224.965	234.339	143.728	140.603	165.599	128.105	153.101	326.512	46.868		59.618	69.921	45.781	49.013	57.548	69.921	55.351	56.815	47.548	45.049	46.513	50.351	44.013	33.711	68.028		0.828	0.863	0.918	0.858	0.895	0.791	0.923	0.912	0.799	0.871	0.962	0.635	0.993	0.829	0.127		1.658	1.5
323.387	231.214	154.664	223.403	315.576	629.59	324.95	256.21	184.346	151.539	349.946	193.72	115.607	270.271	95.298		66.815	55.351	46.513	58.583	66.689	103.935	67.421	62.85	49.013	45.477	71.689	52.851	44.013	69.921	51.69		0.91	0.948	0.898	0.818	0.892	0.732	0.898	0.815	0.964	0.921	0.856	0.872	0.75	0.839	0.448		1.319	1.247
196.844	231.214	148.414	198.407	198.407	187.471	193.72	253.086	204.656	109.358	199.969	521.794	73.426	521.794	259.335		51.816	57.119	44.745	53.583	52.548	56.387	51.513	59.618	53.583	39.013	51.816	93.329	30.908	61.386	139.413		0.921	0.891	0.932	0.868	0.903	0.741	0.917	0.895	0.896	0.903	0.936	0.753	0.966	0.901	0.168		1.452	1.297
242.15	707.703	710.827	171.848	289.018	440.557	212.467	229.652	303.078	117.169	193.72	615.53	379.629	670.209	118.732		57.119	101.132	117.469	50.048	64.492	86.384	54.316	55.78	71.26	39.746	51.816	118.934	97.9	86.259	81.865		0.933	0.87	0.647	0.862	0.873	0.742	0.905	0.928	0.75	0.932	0.907	0.547	0.498	0.881	0.223		1.416	1.25
373.379	378.066	179.66	160.913	190.595	173.411	142.165	220.278	153.101	159.35	259.335	170.286	181.222	237.463	473.364		72.117	74.188	53.887	47.548	51.084	51.387	44.013	56.083	45.049	47.977	61.386	50.351	54.619	116.737	147.393		0.902	0.863	0.777	0.894	0.918	0.825	0.922	0.88	0.948	0.87	0.865	0.844	0.763	0.618	0.274		1.404	1.305
243.712	331.199	248.399	304.64	217.154	253.086	235.901	370.255	220.278	140.603	240.588	160.913	178.097	142.165	226.527		57.851	68.153	57.851	66.815	54.316	59.315	55.351	72.118	57.851	43.281	57.548	69.492	49.316	56.387	123.556		0.915	0.896	0.933	0.858	0.925	0.904	0.968	0.895	0.827	0.943	0.913	0.419	0.92	0.939	0.186		1.357	1.13
326.511	228.09	142.165	171.848	287.455	279.644	192.158	698.329	190.595	118.732	109.358	209.343	248.399	198.407	320.263		67.724	56.083	43.281	49.316	62.118	62.85	50.78	124.969	52.119	39.746	39.317	55.654	62.118	44.316	141.662		0.895	0.911	0.954	0.888	0.936	0.89	0.936	0.562	0.882	0.944	0.889	0.849	0.809	0.91	0.201		1.09	1.373
217.154	149.977	215.592	149.977	164.037	178.097	154.664	278.082	257.773	264.022	198.407	112.483	223.403	254.648	214.029		53.583	49.745	54.619	44.013	49.013	49.316	45.049	61.815	57.851	61.083	50.351	40.478	54.619	51.816	99.239		0.95	0.762	0.908	0.973	0.858	0.92	0.958	0.915	0.968	0.889	0.983	0.863	0.941	0.929	0.273		1.278	2.278
171.848	279.644	62.49	201.531	207.78	365.568	190.595	239.025	181.222	126.543	149.977	259.335	240.588	678.02	496.798		52.119	61.386	38.71	52.851	53.28	84.794	50.048	56.083	50.048	42.245	46.084	61.689	60.654	59.19	198.655		0.795	0.933	0.524	0.907	0.92	0.639	0.956	0.955	0.909	0.891	0.887	0.856	0.822	0.913	0.158		1.491	1.22
209.342	207.78	249.961	185.909	284.331	251.524	187.471	506.172	267.146	148.414	143.728	65.615	146.852	242.15	185.909		53.583	53.583	66.082	51.816	62.118	58.886	49.316	84.188	60.047	45.352	45.477	32.978	46.816	99.793	85.401		0.916	0.909	0.719	0.87	0.926	0.912	0.969	0.897	0.931	0.907	0.873	0.758	0.842	0.856	0.32		1.387	1.393
1.562	473.364	192.158	173.411	173.411	248.399	206.218	204.656	228.09	193.72	157.788	92.173	167.162	170.286	310.889		3.535	80.956	51.084	47.548	47.548	57.851	52.851	52.548	57.119	50.78	46.816	39.013	47.852	58.583	161.534		1	0.908	0.925	0.964	0.964	0.933	0.928	0.931	0.879	0.944	0.905	0.761	0.917	0.887	0.15		1	1.413
412.436	237.463	245.274	309.327	315.576	160.913	190.595	201.531	215.592	168.724	170.286	59.366	382.753	215.592	318.701		76.259	57.119	58.28	64.618	68.153	49.013	52.548	51.816	53.28	47.548	50.048	28.408	75.956	48.584	114.112		0.891	0.915	0.907	0.931	0.854	0.842	0.867	0.943	0.954	0.938	0.854	0.924	0.834	0.907	0.308		1.53	1.375
268.708	199.969	207.78	304.64	137.479	284.331	240.588	317.138	274.957	143.728	199.969	148.414	154.664	226.527	184.346		61.386	51.084	52.851	65.654	42.245	63.154	57.119	66.386	61.083	43.281	51.816	48.584	46.084	58.457	81.133		0.896	0.963	0.935	0.888	0.968	0.896	0.927	0.904	0.926	0.964	0.936	0.79	0.915	0.793	0.352		1.153	1.146
271.833	242.15	260.897	184.346	204.656	220.278	159.35	231.214	246.837	176.535	154.664	465.553	174.973	190.595	332.761		61.386	58.583	63.154	50.048	50.78	56.387	46.513	55.78	61.083	49.316	44.745	84.062	47.245	56.387	136.359		0.907	0.887	0.822	0.925	0.997	0.871	0.926	0.934	0.831	0.912	0.971	0.828	0.985	0.895	0.225		1.303	1.233
381.19	284.331	301.516	212.467	192.158	99.985	284.331	228.09	317.138	132.792	231.214	299.954	137.479	87.486	181.222		72.421	61.386	71.689	55.048	51.084	41.21	65.654	55.351	80.527	41.817	60.047	64.618	44.316	50.351	132.091		0.913	0.948	0.737	0.881	0.925	0.74	0.829	0.936	0.615	0.954	0.806	0.903	0.88	0.945	0.131		1.245	1.093
148.414	353.07	298.391	229.652	326.512	137.479	198.407	499.923	312.452	156.226	299.954	235.901	620.216	93.735	487.424		47.548	69.189	65.35	56.815	69.189	45.049	53.583	105.274	65.654	46.816	67.421	75.224	100.096	34.014	205.119		0.825	0.927	0.878	0.894	0.857	0.851	0.868	0.567	0.911	0.896	0.829	0.524	0.778	0.95	0.146		2.009	1.066
245.274	104.671	179.66	224.965	292.142	193.72	389.002	273.395	162.475	171.848	160.913	79.675	231.214	198.407	454.617		59.315	39.317	50.78	55.351	62.85	51.084	74.188	61.386	46.513	47.548	46.084	35.478	56.387	35.478	169.337		0.876	0.851	0.876	0.923	0.929	0.933	0.888	0.912	0.944	0.955	0.952	0.795	0.914	0.936	0.199		1.478	1.872
264.021	167.162	359.319	221.841	384.315	382.753	154.664	382.753	253.086	167.162	179.66	160.913	154.664	246.837	264.022		62.118	49.316	96.435	56.387	100.828	83.027	45.049	81.991	61.386	48.281	50.78	46.513	44.013	52.851	151.964		0.86	0.864	0.486	0.877	0.475	0.698	0.958	0.715	0.844	0.901	0.876	0.935	1	0.893	0.144		1.491	1.624
240.587	81.237	187.471	268.708	234.339	184.346	228.09	267.146	171.848	171.848	146.852	365.568	378.066	21.872	149.977		58.583	31.943	55.048	64.618	57.119	50.78	55.048	59.618	49.316	47.245	46.816	163.674	74.921	60.351	96.007		0.881	1	0.777	0.809	0.903	0.898	0.946	0.944	0.888	0.967	0.842	0.171	0.846	0.852	0.204		1.617	1.299
315.576	339.01	237.463	187.471	185.909	226.527	274.957	193.72	262.459	162.475	276.52	378.066	187.471	151.539	396.813		65.654	72.295	60.047	52.977	49.013	58.886	62.118	52.977	71.992	46.816	63.886	75.224	49.745	15.605	126.914		0.92	0.815	0.828	0.839	0.973	0.821	0.895	0.867	0.636	0.932	0.851	0.84	0.952	1	0.31		1.333	1.311
7.811	365.568	245.274	196.844	207.78	309.327	246.837	210.905	628.028	148.414	170.286	217.154	223.403	149.977	221.841		9.57	68.886	58.886	51.084	53.583	65.957	59.618	54.744	99.061	43.281	47.245	55.048	57.851	46.513	137.091		1	0.968	0.889	0.948	0.909	0.894	0.873	0.884	0.804	0.996	0.959	0.901	0.839	0.88	0.148		1.553	1.16
571.786	593.658	190.595	195.282	257.773	217.154	134.354	351.508	235.901	140.603	198.407	115.607	128.105	379.629	45.305		99.667	97.293	50.048	52.548	60.654	56.083	44.013	69.921	94.239	44.013	51.816	39.746	50.351	45.781	64.064		0.723	0.788	0.956	0.889	0.88	0.868	0.872	0.904	0.334	0.912	0.929	0.92	0.635	0.899	0.139		1.872	1.702
259.334	151.539	168.724	209.343	196.844	209.343	223.403	368.693	267.146	149.977	174.973	99.985	267.146	135.916	456.179		61.083	48.281	48.584	54.012	50.78	53.583	55.351	84.794	80.223	45.781	47.977	39.442	62.118	72.421	183.604		0.873	0.817	0.898	0.902	0.959	0.916	0.916	0.644	0.522	0.899	0.955	0.808	0.87	0.91	0.17		1.731	2.037
210.905	371.817	282.769	210.905	290.58	21.872	237.463	306.203	235.901	165.599	139.041	151.539	256.21	168.724	46.868		59.19	86.259	101.309	54.619	67.421	19.141	57.548	64.315	56.083	46.513	45.477	46.816	60.957	43.281	88.507		0.756	0.628	0.346	0.888	0.803	0.75	0.901	0.93	0.942	0.962	0.845	0.869	0.866	0.912	0.075		1.43	2.219
221.84	245.274	206.218	145.29	417.123	517.107	165.599	223.403	296.829	206.218	153.101	309.327	129.667	132.792	415.561		55.048	59.618	53.28	44.013	75.653	104.667	48.281	55.048	65.35	51.816	44.013	73.885	41.513	46.816	164.766		0.92	0.867	0.913	0.943	0.916	0.593	0.893	0.926	0.873	0.965	0.993	0.712	0.946	0.967	0.192		1.356	1.638
278.082	312.452	218.716	276.52	192.158	209.343	184.346	253.086	256.21	154.664	184.346	224.965	179.66	298.391	170.286		63.154	70.224	56.083	64.189	52.851	53.583	51.084	59.315	79.491	44.745	49.013	55.351	52.548	42.549	82.901		0.876	0.796	0.874	0.843	0.864	0.916	0.888	0.904	0.51	0.971	0.964	0.923	0.818	0.922	0.311		1.638	1.518
195.282	134.354	899.861	124.981	182.784	513.983	156.226	212.467	165.599	154.664	260.897	221.841	257.773	145.29	279.644		55.048	42.245	133.504	40.478	49.745	84.491	45.352	53.583	47.245	45.781	58.583	55.654	58.886	68.886	93.203		0.81	0.946	0.634	0.959	0.928	0.905	0.954	0.93	0.932	0.927	0.955	0.9	0.934	0.79	0.405		1.913	1.106
326.511	137.479	148.414	148.414	203.094	31.245	140.603	182.784	171.848	171.848	156.226	162.475	159.35	179.66	1202.94		67.118	41.513	46.816	45.049	53.583	20.176	44.013	49.745	47.245	46.816	44.745	46.513	45.477	45.049	222.063		0.911	1	0.851	0.919	0.889	0.965	0.912	0.928	0.967	0.985	0.981	0.944	0.968	0.9	0.307		1.351	1.19
465.552	659.273	223.403	545.228	210.905	214.029	193.72	215.592	165.599	157.788	179.66	151.539	246.837	653.024	59.366		98.025	137.771	54.316	89.794	52.548	54.316	51.816	54.619	49.316	45.781	49.013	47.245	62.118	50.351	38.281		0.609	0.436	0.952	0.85	0.96	0.912	0.907	0.908	0.856	0.946	0.94	0.853	0.804	0.891	0.509		1.701	1.896
201.531	196.844	246.837	164.037	185.909	349.946	259.335	339.01	264.022	156.226	287.455	242.15	157.788	165.599	151.539		56.512	51.816	57.851	48.281	51.513	68.457	61.386	71.992	64.921	46.084	62.118	56.815	45.781	97.597	74.063		0.793	0.921	0.927	0.884	0.88	0.938	0.865	0.822	0.787	0.924	0.936	0.943	0.946	0.862	0.347		2.124	1.387
309.327	204.656	215.592	123.418	184.346	218.716	167.162	189.033	153.101	171.848	145.29	226.527	293.704	89.049	992.034		65.654	51.084	57.851	47.548	52.119	61.386	53.155	53.28	49.442	50.351	46.513	58.886	62.85	48.281	289.055		0.902	0.986	0.81	0.686	0.853	0.729	0.743	0.837	0.787	0.852	0.844	0.821	0.934	0.893	0.149		1.366	1.217
207.78	199.969	1168.57	209.343	218.716	268.708	239.025	178.097	323.387	146.852	159.35	104.671	232.776	209.343	198.407		54.012	52.245	141.306	51.816	52.851	61.083	57.422	50.048	68.886	43.281	46.816	36.21	56.083	36.21	94.542		0.895	0.921	0.735	0.98	0.984	0.905	0.911	0.893	0.856	0.985	0.914	1	0.93	0.853	0.279		1.581	1.506
209.342	196.844	62.49	159.35	231.214	131.23	176.535	243.712	335.885	181.222	649.899	131.23	198.407	189.033	271.833		58.154	52.548	122.52	47.245	56.815	111.988	49.316	61.512	79.062	50.048	105.702	42.245	51.387	52.851	168.605		0.778	0.896	0.052	0.897	0.9	0.131	0.912	0.809	0.675	0.909	0.731	0.924	0.944	0.942	0.12		1.974	1.309
242.15	232.776	224.965	207.78	218.716	193.72	226.527	476.489	267.146	129.667	132.792	328.074	156.226	178.097	224.965		58.28	58.154	146.99	53.583	56.083	86.432	55.78	107.899	63.457	40.781	44.442	73.76	46.21	52.851	104.845		0.896	0.865	0.131	0.909	0.874	0.326	0.915	0.514	0.834	0.98	0.845	0.758	0.919	0.85	0.257		1.617	1.35
462.428	443.681	168.724	215.592	187.471	242.15	192.158	203.094	104.671	179.66	184.346	259.335	120.294	296.829	193.72		85.223	83.152	53.887	55.351	51.816	60.654	51.084	56.083	38.71	50.78	50.78	60.351	41.21	49.316	101.309		0.8	0.806	0.73	0.884	0.877	0.827	0.925	0.811	0.878	0.876	0.898	0.895	0.89	0.92	0.237		1.668	1.43
214.029	223.403	474.926	173.411	192.158	237.463	256.21	215.592	278.082	142.165	201.531	245.274	182.784	196.844	498.36		54.316	56.387	82.723	49.013	51.816	56.083	59.618	56.387	62.85	44.013	53.583	57.851	51.387	65.654	214.386		0.912	0.883	0.872	0.907	0.899	0.949	0.906	0.852	0.885	0.922	0.882	0.921	0.87	0.865	0.136		1.424	1.15
206.218	221.841	532.73	267.146	331.199	271.833	165.599	271.833	423.372	168.724	145.29	556.164	176.535	84.362	282.769		54.744	55.048	85.955	58.886	68.153	66.26	47.245	60.047	108.934	48.584	44.745	91.561	48.584	56.815	100.274		0.865	0.92	0.906	0.968	0.896	0.778	0.932	0.947	0.448	0.898	0.912	0.834	0.94	0.766	0.353		1.466	1.424
264.021	243.712	182.784	215.592	199.969	226.527	201.531	268.708	134.354	134.354	187.471	354.633	168.724	176.535	524.919		59.618	58.886	83.633	52.851	52.119	57.119	55.351	61.083	44.745	41.817	50.78	97.471	48.281	39.013	159.16		0.933	0.883	0.328	0.97	0.925	0.873	0.827	0.905	0.843	0.966	0.914	0.469	0.91	0.697	0.26		1.315	1.725
201.531	192.158	228.09	167.162	274.957	209.343	203.094	432.745	193.72	167.162	199.969	192.158	171.848	282.769	271.833		54.316	53.887	60.957	48.281	62.118	57.548	53.28	76.688	54.922	47.548	54.012	50.048	48.584	49.316	101.738		0.858	0.832	0.771	0.901	0.895	0.794	0.899	0.925	0.807	0.929	0.861	0.964	0.915	0.912	0.33		1.534	1.476
195.282	128.105	239.025	239.025	192.158	29.683	218.716	295.267	218.716	159.35	198.407	231.214	217.154	209.343	184.346		52.851	41.21	59.19	56.083	50.048	20.176	57.119	62.118	59.922	45.781	53.28	55.351	52.548	76.259	80.83		0.879	0.948	0.857	0.955	0.964	0.916	0.842	0.962	0.765	0.955	0.878	0.948	0.988	0.611	0.355		1.658	1.185
1.562	278.082	257.773	203.094	203.094	282.769	190.595	220.278	223.403	149.977	146.852	123.418	243.712	135.916	295.267		3.535	76.992	80.098	51.816	54.316	62.85	51.816	57.119	59.19	44.745	49.745	45.352	59.315	53.583	130.449		1	0.59	0.505	0.951	0.865	0.9	0.892	0.848	0.801	0.941	0.746	0.754	0.87	0.916	0.218		1	2.815
465.552	262.459	204.656	185.909	193.72	40.619	185.909	228.09	192.158	217.154	174.973	157.788	339.01	384.315	471.802		79.92	59.618	55.048	51.084	52.851	26.943	49.316	55.78	50.048	54.012	48.584	47.245	70.653	43.281	202.316		0.916	0.928	0.849	0.895	0.872	0.703	0.961	0.921	0.964	0.935	0.932	0.888	0.853	0.912	0.145		1.226	1.238
178.097	278.082	193.72	146.852	23.434	342.134	164.037	206.218	143.728	187.471	590.533	207.78	212.467	279.644	232.776		50.048	63.154	54.744	44.013	16.338	69.189	47.548	54.316	66.563	49.316	91.561	52.548	53.28	72.421	110.451		0.893	0.876	0.812	0.953	1	0.898	0.912	0.878	0.408	0.969	0.885	0.946	0.941	0.921	0.24		1.698	1.461
296.829	143.728	274.957	159.35	232.776	296.829	206.218	179.66	199.969	157.788	232.776	321.825	171.848	228.09	195.282		63.886	45.352	67.421	45.781	57.119	65.654	53.583	49.316	53.28	45.781	55.78	68.886	49.013	63.886	118.254		0.914	0.878	0.76	0.955	0.897	0.865	0.903	0.928	0.885	0.946	0.94	0.852	0.899	0.861	0.175		1.251	1.511
215.591	174.973	303.078	182.784	176.535	262.459	159.35	235.901	212.467	154.664	220.278	181.222	137.479	124.981	78.113		53.28	48.584	65.654	52.851	49.316	62.725	45.781	55.78	56.69	46.816	54.316	51.816	45.781	57.422	48.887		0.954	0.932	0.884	0.822	0.912	0.838	0.955	0.953	0.831	0.887	0.938	0.848	0.824	0.869	0.411		1.177	1.303
201.531	203.094	273.395	160.913	271.833	284.331	223.403	243.712	210.905	204.656	268.708	329.636	396.813	609.281	357.757		52.851	56.083	62.118	48.281	60.351	69.492	55.351	57.851	57.422	52.851	61.083	120.74	73.885	42.245	163.302		0.907	0.811	0.89	0.867	0.938	0.74	0.916	0.915	0.804	0.921	0.905	0.284	0.913	0.88	0.169		1.52	1.528
210.905	201.531	278.082	179.66	385.878	546.79	184.346	251.524	240.588	212.467	378.066	271.833	179.66	224.965	281.206		56.083	54.922	65.047	49.316	73.456	86.259	50.78	58.583	58.583	54.619	74.188	100.217	52.548	94.793	112.647		0.843	0.84	0.826	0.928	0.899	0.923	0.898	0.921	0.881	0.895	0.863	0.34	0.818	0.852	0.278		1.678	1.26
273.395	182.784	339.01	140.603	201.531	307.765	149.977	256.21	196.844	154.664	649.899	543.666	149.977	370.255	335.885		63.154	50.351	70.956	46.816	52.548	65.35	45.049	61.083	53.155	44.745	125.701	86.991	43.71	55.78	150.197		0.861	0.906	0.846	0.806	0.917	0.906	0.929	0.863	0.875	0.971	0.517	0.903	0.986	0.909	0.187		1.422	1.51
434.307	32.807	235.901	159.35	214.029	481.175	134.354	243.712	790.502	165.599	254.648	367.131	140.603	215.592	81.237		92.597	19.873	66.082	46.816	53.887	81.259	42.245	58.583	107.596	46.513	59.922	88.026	44.316	75.956	71.26		0.637	1	0.679	0.914	0.926	0.916	0.946	0.892	0.858	0.962	0.891	0.595	0.9	0.806	0.201		1.534	1.182
198.406	218.716	612.405	196.844	231.214	303.078	54.679	354.633	259.335	142.165	182.784	709.265	170.286	214.029	190.595		54.012	55.654	117.344	52.548	57.119	64.618	27.979	71.689	69.063	42.978	48.281	109.667	47.852	53.583	93.203		0.855	0.887	0.559	0.896	0.891	0.912	0.878	0.867	0.683	0.967	0.985	0.741	0.935	0.944	0.276		1.61	1.239
220.278	37.494	256.21	243.712	192.158	304.64	237.463	456.179	148.414	198.407	273.395	209.343	162.475	349.946	218.716		53.583	25.479	59.618	57.119	51.816	67.421	79.795	79.188	45.781	50.78	63.154	54.316	46.816	53.28	163.302		0.964	0.726	0.906	0.939	0.899	0.842	0.469	0.914	0.89	0.967	0.861	0.892	0.932	0.947	0.103		1.382	2.355
184.346	249.961	301.516	218.716	212.467	360.882	240.588	178.097	243.712	153.101	231.214	217.154	167.162	212.467	367.131		51.084	61.386	86.436	54.619	53.28	73.76	63.457	66.815	66.992	44.745	56.815	56.083	49.19	68.153	143.733		0.888	0.834	0.507	0.921	0.941	0.834	0.751	0.501	0.682	0.961	0.9	0.868	0.868	0.947	0.223		1.056	1.579
260.897	228.09	235.901	196.844	203.094	1376.35	131.23	321.825	240.588	121.856	229.652	234.339	40.619	251.524	285.893		59.618	56.815	72.118	52.851	51.816	161.608	42.549	71.082	58.583	41.513	57.119	58.154	23.105	53.887	134.717		0.922	0.888	0.57	0.886	0.951	0.662	0.911	0.8	0.881	0.889	0.885	0.871	0.956	0.919	0.198		1.513	1.587
196.844	279.644	217.154	162.475	267.146	178.097	146.852	246.837	240.588	237.463	271.833	239.025	268.708	239.025	301.516		52.119	59.618	56.083	48.281	61.386	48.281	47.548	56.083	63.886	56.815	63.154	56.387	59.315	58.886	123.985		0.911	0.989	0.868	0.876	0.891	0.96	0.816	0.986	0.741	0.924	0.856	0.945	0.96	0.912	0.246		1.471	1.107
231.214	248.399	149.977	293.704	389.002	271.833	176.535	412.436	189.033	132.792	126.543	209.343	212.467	203.094	62.49		59.19	57.851	76.134	62.85	74.921	64.618	48.281	73.885	51.084	41.817	43.71	58.154	54.012	58.583	52.119		0.829	0.933	0.325	0.934	0.871	0.818	0.952	0.949	0.91	0.954	0.832	0.778	0.915	0.875	0.289		1.527	1.229
190.595	159.35	206.218	217.154	181.222	145.29	184.346	174.973	218.716	146.852	184.346	148.414	185.909	228.09	185.909		55.654	47.852	56.69	54.619	48.281	46.084	51.084	48.281	53.583	45.781	51.084	47.852	48.281	53.583	77.901		0.773	0.875	0.806	0.915	0.977	0.86	0.888	0.943	0.957	0.88	0.888	0.815	1	0.889	0.385		1.868	1.402
306.202	192.158	553.039	209.343	278.082	267.146	153.101	168.724	251.524	153.101	229.652	168.724	274.957	503.047	142.165		64.921	51.816	88.758	52.851	61.386	73.153	46.084	48.584	57.851	46.21	56.083	48.584	64.189	57.119	70.099		0.913	0.899	0.882	0.942	0.927	0.627	0.906	0.898	0.944	0.901	0.918	0.898	0.839	0.879	0.364		1.312	1.503
342.134	229.652	229.652	273.395	282.769	167.162	187.471	171.848	304.64	159.35	26.558	114.045	162.475	149.977	328.074		76.991	55.048	58.886	59.618	61.386	49.013	52.548	50.477	68.457	48.281	19.141	42.549	46.084	84.491	158.302		0.725	0.952	0.832	0.967	0.943	0.874	0.853	0.848	0.817	0.859	0.911	0.792	0.961	0.886	0.165		1.663	1.396
201.531	760.82	474.926	199.969	285.893	99.985	282.769	299.954	199.969	207.78	218.716	109.358	182.784	249.961	226.527		53.28	121.13	103.077	52.548	62.85	39.013	61.689	66.689	52.119	52.548	53.28	100.101	49.316	45.049	119.844		0.892	0.652	0.562	0.91	0.909	0.825	0.934	0.848	0.925	0.946	0.968	0.137	0.944	0.929	0.198		1.362	1.725
201.531	317.138	242.15	198.407	231.214	181.222	143.728	153.101	207.78	268.708	157.788	378.066	167.162	135.916	432.745		53.583	66.689	63.76	52.851	55.654	49.316	44.316	47.245	53.887	64.921	46.513	121.128	47.548	69.618	177.569		0.882	0.896	0.749	0.893	0.938	0.936	0.92	0.862	0.899	0.801	0.917	0.324	0.929	0.648	0.172		1.377	1.425
274.957	267.146	454.617	160.913	196.844	237.463	164.037	178.097	229.652	203.094	135.916	563.975	212.467	306.203	285.893		63.457	60.351	84.491	50.351	51.816	58.886	47.548	51.387	56.083	52.119	45.049	92.294	53.583	42.978	118.379		0.858	0.922	0.8	0.798	0.921	0.861	0.912	0.848	0.918	0.94	0.842	0.832	0.93	0.925	0.256		1.308	1.251
214.029	284.331	471.802	190.595	353.07	228.09	192.158	176.535	190.595	185.909	206.218	268.708	240.588	271.833	912.359		54.316	70.956	117.469	51.513	72.421	57.548	52.119	49.316	51.387	50.048	53.28	110.148	57.851	74.492	222.063		0.912	0.71	0.43	0.903	0.846	0.865	0.889	0.912	0.907	0.933	0.913	0.278	0.903	0.693	0.233		1.289	1.503
245.274	179.66	473.364	162.475	210.905	189.033	184.346	320.263	167.162	143.728	104.671	303.078	224.965	221.841	418.685		58.583	50.78	121.182	46.513	51.816	52.119	51.387	65.654	48.281	44.013	39.013	65.957	55.351	61.386	123.076		0.898	0.876	0.405	0.944	0.987	0.874	0.877	0.934	0.901	0.932	0.864	0.875	0.923	0.907	0.347		1.491	1.467
209.342	193.72	314.014	203.094	276.52	251.524	170.286	320.263	187.471	142.165	109.358	176.535	315.576	296.829	184.346		55.351	51.084	68.76	53.583	62.118	61.386	48.281	67.118	49.316	43.281	37.246	50.048	67.118	55.351	76.134		0.859	0.933	0.835	0.889	0.901	0.839	0.918	0.893	0.969	0.954	0.991	0.886	0.88	0.91	0.4		1.585	1.165
312.451	217.154	251.524	226.527	268.708	203.094	242.15	203.094	212.467	159.35	418.685	190.595	196.844	142.165	90.611		68.028	56.387	58.886	56.815	61.386	54.316	56.815	52.548	100.274	45.781	79.491	50.048	51.084	65.654	65.528		0.848	0.858	0.912	0.882	0.896	0.865	0.943	0.924	0.266	0.955	0.833	0.956	0.948	0.865	0.265		1.398	1.582
353.07	762.382	306.203	164.037	243.712	185.909	206.218	218.716	154.664	162.475	351.508	368.693	217.154	401.5	221.841		81.259	106.435	69.492	49.013	59.618	50.351	54.012	54.316	48.281	47.245	69.618	75.956	61.083	43.281	108.683		0.672	0.846	0.797	0.858	0.862	0.921	0.888	0.932	0.834	0.915	0.911	0.803	0.731	0.954	0.236		1.753	1.248
367.13	257.773	257.773	212.467	231.214	218.716	187.471	195.282	196.844	181.222	281.206	29.683	157.788	301.516	588.971		76.563	58.583	61.815	55.351	54.316	54.316	53.583	51.513	50.048	51.084	63.886	19.444	45.781	74.921	223.224		0.787	0.944	0.848	0.871	0.985	0.932	0.821	0.925	0.988	0.873	0.866	0.987	0.946	0.899	0.149		1.519	1.285
237.463	253.086	167.162	220.278	270.271	315.576	167.162	184.346	206.218	171.848	184.346	190.595	242.15	215.592	459.304		58.583	60.654	48.584	54.619	61.083	65.654	48.281	51.816	54.316	49.013	49.745	51.816	59.012	77.295	143.429		0.869	0.864	0.89	0.928	0.91	0.92	0.901	0.863	0.878	0.899	0.936	0.892	0.874	0.634	0.281		1.654	1.596
429.62	229.652	168.724	195.282	203.094	248.399	192.158	303.078	57.804	139.041	315.576	176.535	156.226	395.251	310.889		77.117	57.119	49.619	51.816	54.012	68.153	54.619	65.654	88.361	44.013	84.491	50.048	45.781	55.048	118.379		0.908	0.885	0.861	0.914	0.875	0.672	0.809	0.884	0.093	0.902	0.556	0.886	0.937	0.894	0.279		1.251	1.446
240.587	234.339	496.798	34.37	228.09	192.158	196.844	184.346	184.346	224.965	110.92	140.603	234.339	103.109	540.541		58.583	57.548	145.323	20.605	56.815	52.851	51.084	51.387	53.583	55.048	37.978	43.281	57.548	75.349	154.035		0.881	0.889	0.296	1	0.888	0.864	0.948	0.877	0.807	0.933	0.966	0.943	0.889	0.875	0.286		1.309	1.438
379.628	224.965	164.037	154.664	231.214	171.848	256.21	198.407	245.274	151.539	484.3	259.335	196.844	198.407	210.905		74.921	54.619	46.816	46.513	57.119	48.281	59.618	54.316	58.583	45.781	84.491	73.331	50.048	36.514	74.795		0.85	0.948	0.941	0.898	0.891	0.926	0.906	0.845	0.898	0.909	0.853	0.606	0.988	0.972	0.474		1.449	1.259
360.881	226.527	542.103	201.531	264.022	201.531	201.531	184.346	245.274	171.848	145.29	179.66	270.271	106.234	274.957		72.421	56.083	88.758	54.316	59.315	51.816	52.548	51.084	57.422	48.281	45.049	49.316	60.351	52.548	103.809		0.865	0.905	0.865	0.858	0.943	0.943	0.917	0.888	0.935	0.926	0.9	0.928	0.932	0.903	0.321		1.363	1.41
359.319	243.712	293.704	179.66	168.724	212.467	185.909	181.222	195.282	182.784	203.094	501.485	129.667	131.23	265.584		72.724	57.851	63.886	50.351	47.548	54.619	51.513	50.048	55.351	48.281	51.513	90.829	40.781	39.442	113.076		0.854	0.915	0.904	0.891	0.938	0.895	0.88	0.909	0.801	0.985	0.962	0.764	0.98	0.858	0.261		1.246	1.364
335.885	435.87	488.987	184.346	242.15	176.535	176.535	174.973	206.218	160.913	151.539	264.022	348.383	226.527	428.059		70.224	78.759	86.991	50.048	66.26	49.619	51.084	50.048	58.154	45.049	45.049	67.724	71.689	41.513	162.999		0.856	0.883	0.812	0.925	0.693	0.901	0.85	0.878	0.766	0.996	0.938	0.723	0.852	0.957	0.202		1.339	1.372
279.644	354.633	274.957	193.72	146.852	253.086	185.909	182.784	192.158	137.479	381.191	137.479	187.471	273.395	214.029		65.654	99.061	71.26	51.513	48.709	59.315	51.513	49.316	50.78	43.281	71.689	44.013	50.048	55.351	94.239		0.815	0.454	0.68	0.917	0.778	0.904	0.88	0.944	0.936	0.922	0.932	0.892	0.941	0.929	0.303		1.592	2.256
324.949	610.843	604.594	151.539	214.029	190.595	201.531	173.411	164.037	207.78	292.142	207.78	110.92	381.191	324.95		68.457	118.63	108.202	45.781	55.351	52.245	55.048	49.745	72.295	53.583	69.189	61.993	37.978	63.886	165.928		0.871	0.545	0.649	0.909	0.878	0.877	0.836	0.881	0.394	0.909	0.767	0.679	0.966	0.842	0.148		1.219	2.371
256.21	174.973	229.652	301.516	298.391	182.784	168.724	157.788	196.844	132.792	26.558	403.063	153.101	109.358	445.243		62.118	49.013	57.851	65.654	68.153	50.351	48.584	45.781	54.619	41.513	18.105	78.759	44.316	72.421	181.711		0.834	0.915	0.862	0.879	0.807	0.906	0.898	0.946	0.829	0.968	1	0.817	0.98	0.913	0.169		1.546	1.356
260.897	309.327	531.168	279.644	228.09	187.471	209.343	218.716	193.72	220.278	151.539	156.226	142.165	239.025	267.146		59.315	66.386	88.758	63.154	55.351	51.084	53.583	53.887	51.513	55.351	46.513	47.548	44.013	43.281	142.394		0.932	0.882	0.847	0.881	0.936	0.903	0.916	0.947	0.917	0.904	0.88	0.868	0.922	0.734	0.166		1.134	1.209
332.761	215.592	198.407	148.414	185.909	298.391	226.527	278.082	237.463	156.226	271.833	23.434	145.29	259.335	260.897		70.224	55.048	56.387	44.316	50.048	64.618	55.048	62.85	62.118	45.781	61.083	16.338	45.781	56.387	162.141		0.848	0.894	0.784	0.95	0.933	0.898	0.939	0.885	0.773	0.937	0.916	1	0.871	0.945	0.125		1.35	1.477
273.395	203.094	224.965	196.844	196.844	538.979	234.339	389.002	810.812	162.475	164.037	193.72	171.848	164.037	370.255		62.85	53.583	54.316	50.78	53.887	87.294	56.083	72.421	109.667	45.781	46.816	87.901	51.084	59.922	154.035		0.87	0.889	0.958	0.959	0.852	0.889	0.936	0.932	0.847	0.974	0.941	0.315	0.828	0.908	0.196		1.373	1.304
306.202	332.761	285.893	189.033	342.134	915.483	168.724	245.274	556.164	189.033	193.72	143.728	214.029	601.469	328.074		67.118	68.886	67.421	51.084	73.885	114.363	50.048	61.689	112.041	54.316	54.619	44.013	56.815	47.245	112.647		0.854	0.881	0.79	0.91	0.788	0.88	0.846	0.81	0.557	0.805	0.816	0.932	0.833	0.924	0.325		1.594	1.484
301.515	259.335	528.043	185.909	204.656	220.278	378.066	588.971	235.901	114.045	145.29	182.784	132.792	223.403	171.848		67.421	61.083	90.223	50.048	52.119	57.119	73.456	92.294	72.295	38.71	45.477	50.351	41.513	94.793	71.866		0.834	0.873	0.815	0.933	0.947	0.848	0.88	0.869	0.567	0.956	0.883	0.906	0.968	0.841	0.418		1.426	1.552
351.508	292.142	345.259	184.346	242.15	251.524	243.712	181.222	257.773	181.222	170.286	103.109	234.339	270.271	498.36		87.294	63.886	77.295	54.012	57.548	59.618	58.583	49.013	60.351	50.351	49.013	39.442	59.315	57.119	154.893		0.58	0.899	0.726	0.794	0.919	0.889	0.892	0.948	0.889	0.898	0.891	0.833	0.837	0.86	0.261		1.771	1.409
353.07	228.09	204.656	239.025	438.994	212.467	237.463	287.455	239.025	378.066	195.282	234.339	168.724	360.882	365.568		71.992	56.083	51.816	57.119	102.167	54.619	56.083	63.154	60.351	79.795	51.084	69.492	48.281	60.351	172.998		0.856	0.911	0.958	0.921	0.529	0.895	0.949	0.906	0.825	0.746	0.94	0.61	0.91	0.932	0.153		1.05	1.502
295.266	310.889	523.356	231.214	449.93	223.403	271.833	345.259	240.588	268.708	131.23	109.358	373.38	221.841	421.81		63.154	64.618	95.4	55.351	80.223	55.351	61.815	70.653	71.26	59.618	43.281	39.013	73.885	69.921	156.964		0.93	0.936	0.723	0.948	0.879	0.916	0.894	0.869	0.595	0.95	0.88	0.903	0.86	0.928	0.215		1.26	1.311
299.953	314.014	299.954	323.387	228.09	226.527	215.592	198.407	190.595	179.66	171.848	43.743	174.973	440.557	229.652		71.26	67.724	68.153	75.224	55.048	55.048	53.583	52.119	50.048	49.013	47.548	22.676	48.281	53.583	104.416		0.742	0.86	0.812	0.718	0.946	0.939	0.944	0.918	0.956	0.94	0.955	1	0.943	0.971	0.265		1.53	1.171
284.331	185.909	362.444	190.595	329.636	346.821	223.403	217.154	240.588	135.916	393.689	92.173	143.728	221.841	446.806		63.886	50.351	142.043	51.084	75.527	74.188	54.619	55.048	58.154	43.281	92.723	34.746	44.013	88.758	191.71		0.875	0.921	0.226	0.918	0.726	0.792	0.941	0.901	0.894	0.912	0.575	0.959	0.932	0.703	0.153		1.555	1.146
389.002	243.712	67.177	185.909	229.652	182.784	246.837	249.961	220.278	349.946	151.539	135.916	378.066	184.346	413.998		80.527	57.851	37.549	50.048	55.78	50.351	59.618	60.957	54.316	73.456	44.745	42.978	73.153	58.154	174.943		0.754	0.915	0.599	0.933	0.928	0.906	0.873	0.845	0.938	0.815	0.951	0.925	0.888	0.824	0.17		1.344	1.442
251.523	204.656	160.913	253.086	181.222	210.905	173.411	318.701	237.463	164.037	160.913	101.547	201.531	93.735	159.35		58.886	52.851	78.456	61.083	48.281	55.351	52.851	66.386	56.815	46.816	46.21	38.71	52.851	51.084	86.739		0.912	0.921	0.329	0.852	0.977	0.865	0.78	0.909	0.924	0.941	0.947	0.852	0.907	0.888	0.266		1.156	1.408
314.013	182.784	167.162	249.961	164.037	198.407	176.535	187.471	281.206	246.837	184.346	156.226	149.977	187.471	326.512		68.885	50.351	51.816	59.19	46.513	51.816	49.013	51.816	67.421	60.654	49.013	47.548	45.049	36.943	143.126		0.832	0.906	0.782	0.897	0.953	0.929	0.923	0.877	0.777	0.843	0.964	0.868	0.929	0.863	0.2		1.324	1.262
232.776	568.662	246.837	148.414	187.471	76.551	214.029	232.776	154.664	145.29	440.557	20.309	204.656	374.942	209.343		59.922	115.702	75.653	47.245	49.316	74.063	53.583	56.512	46.816	42.549	80.527	14.873	52.851	51.816	101.309		0.815	0.534	0.542	0.836	0.969	0.175	0.937	0.916	0.887	1	0.854	1	0.921	0.877	0.256		1.789	2.159
262.459	295.267	110.92	189.033	182.784	28.121	153.101	26.558	410.874	246.837	229.652	114.045	262.459	76.551	187.471		63.154	64.921	41.21	51.816	50.351	25.176	45.781	17.676	76.688	58.28	68.153	41.21	61.386	75.224	86.436		0.827	0.88	0.821	0.885	0.906	0.558	0.918	1	0.878	0.913	0.621	0.844	0.875	0.833	0.315		1.468	1.417
323.387	242.15	254.648	153.101	220.278	329.636	170.286	184.346	209.343	164.037	185.909	189.033	199.969	267.146	232.776		74.492	56.815	67.724	50.351	54.619	81.562	47.852	49.316	52.851	47.852	50.655	53.155	51.084	30.479	173.605		0.732	0.943	0.698	0.759	0.928	0.623	0.935	0.953	0.942	0.9	0.91	0.841	0.963	1	0.097		1.241	1.299
243.712	214.029	429.621	320.263	187.471	165.599	199.969	215.592	260.897	70.302	153.101	268.708	167.162	124.981	217.154		62.118	55.78	89.062	68.153	49.013	50.351	53.583	55.351	62.118	37.246	46.513	70.528	47.852	62.118	94.239		0.794	0.864	0.681	0.866	0.981	0.821	0.875	0.884	0.85	0.637	0.889	0.679	0.917	0.87	0.307		1.664	1.651
343.696	193.72	234.339	170.286	985.785	282.769	226.527	320.263	195.282	304.64	134.354	106.234	220.278	190.595	340.572		73.759	51.816	60.957	50.048	142.645	77.295	54.316	67.85	52.119	64.921	42.549	38.407	56.083	45.477	159.767		0.794	0.907	0.793	0.854	0.609	0.595	0.965	0.874	0.903	0.908	0.933	0.905	0.88	0.759	0.168		1.357	1.331
282.768	273.395	37.494	198.407	210.905	270.271	139.041	187.471	164.037	156.226	171.848	201.531	181.222	239.025	239.025		66.386	136.788	21.944	53.583	53.28	64.189	43.584	50.048	47.977	46.816	47.548	57.548	49.316	53.28	107.041		0.806	0.184	0.978	0.868	0.934	0.824	0.92	0.941	0.896	0.896	0.955	0.765	0.936	0.844	0.262		1.295	1.452
334.323	334.323	171.848	187.471	463.991	260.897	149.977	498.36	165.599	156.226	165.599	246.837	124.981	187.471	217.154		69.921	73.153	50.048	51.816	102.899	59.618	45.049	85.223	116.915	45.781	46.513	61.689	40.478	56.083	88.507		0.859	0.785	0.862	0.877	0.551	0.922	0.929	0.862	0.152	0.937	0.962	0.815	0.959	0.955	0.348		1.544	1.617
303.078	232.776	153.101	154.664	214.029	621.779	154.664	28.121	192.158	143.728	203.094	143.728	174.973	239.025	223.403		68.885	57.119	82.472	46.21	53.583	94.061	46.513	19.873	50.048	44.013	52.548	44.316	48.281	51.084	54.619		0.803	0.897	0.283	0.91	0.937	0.883	0.898	0.895	0.964	0.932	0.924	0.92	0.943	0.903	0.941		1.643	1.424
320.262	268.708	273.395	240.588	256.21	174.973	184.346	235.901	174.973	171.848	210.905	210.905	104.671	137.479	306.203		66.386	61.083	64.618	56.083	59.618	47.548	49.316	56.083	49.013	47.548	54.619	54.316	36.943	56.083	64.618		0.913	0.905	0.823	0.961	0.906	0.973	0.953	0.942	0.915	0.955	0.888	0.898	0.964	0.955	0.922		1.187	1.423
428.058	593.658	235.901	168.724	203.094	187.471	203.094	218.716	289.018	265.584	226.527	132.792	153.101	295.267	223.403		84.365	120.272	60.654	49.316	53.28	51.084	53.583	54.619	63.886	60.654	56.083	44.013	48.584	45.477	55.351		0.756	0.516	0.806	0.872	0.899	0.903	0.889	0.921	0.89	0.907	0.905	0.861	0.815	0.835	0.916		1.329	2.605
249.961	399.938	193.72	96.86	178.097	315.576	157.788	638.963	167.162	159.35	245.274	232.776	126.543	267.146	215.592		66.689	90.829	51.816	36.21	47.548	71.689	48.281	93.026	52.119	48.584	58.886	62.725	42.549	65.654	55.654		0.706	0.609	0.907	0.928	0.99	0.772	0.851	0.928	0.773	0.848	0.889	0.743	0.878	0.861	0.875		1.607	1.809
488.986	165.599	182.784	165.599	159.35	203.094	257.773	281.206	165.599	96.86	228.09	167.162	214.029	206.218	229.652		95.4	50.048	52.548	50.78	45.477	53.583	59.618	63.457	46.816	36.21	109.947	48.281	54.316	59.315	57.119		0.675	0.831	0.832	0.807	0.968	0.889	0.911	0.878	0.949	0.928	0.237	0.901	0.912	0.954	0.885		1.183	1.603
448.367	348.383	220.278	157.788	223.403	260.897	221.841	356.195	310.889	259.335	174.973	195.282	187.471	134.354	301.516		88.329	70.653	54.619	47.548	54.316	60.351	55.351	71.385	67.421	64.618	48.281	54.619	50.048	54.619	65.654		0.722	0.877	0.928	0.877	0.952	0.9	0.91	0.878	0.859	0.78	0.943	0.823	0.941	0.869	0.879		1.546	1.559
264.021	323.387	203.094	335.885	242.15	285.893	171.848	315.576	217.154	185.909	282.769	117.169	181.222	190.595	296.829		61.386	65.35	51.816	92.723	57.851	61.815	50.048	66.082	55.048	50.048	63.886	40.049	49.013	41.513	67.421		0.88	0.952	0.951	0.491	0.909	0.94	0.862	0.908	0.901	0.933	0.871	0.918	0.948	0.98	0.821		1.435	1.184
370.255	253.086	178.097	165.599	187.471	337.448	187.471	457.742	215.592	167.162	140.603	557.726	242.15	164.037	139.041		80.956	61.689	49.013	47.548	52.548	81.562	50.351	82.723	57.119	47.245	42.245	95.526	57.851	51.816	51.816		0.71	0.836	0.932	0.92	0.853	0.637	0.929	0.841	0.83	0.941	0.99	0.768	0.909	0.892	0.651		1.35	1.466
304.64	378.066	279.644	181.222	203.094	512.421	193.72	23.434	162.475	134.354	146.852	295.267	174.973	231.214	264.022		72.724	76.259	62.422	48.281	51.816	83.455	52.119	22.676	52.422	43.281	44.745	68.76	52.245	50.351	65.957		0.724	0.817	0.902	0.977	0.951	0.925	0.896	0.573	0.743	0.901	0.922	0.785	0.806	0.813	0.763		1.334	1.735
259.334	259.335	273.395	143.728	301.516	326.512	182.784	146.852	229.652	156.226	145.29	220.278	168.724	332.761	376.504		63.886	57.851	62.118	42.978	66.386	65.654	49.013	46.816	56.083	46.513	44.745	54.619	48.584	61.815	73.153		0.798	0.974	0.89	0.978	0.86	0.952	0.956	0.842	0.918	0.907	0.912	0.928	0.898	0.76	0.884		1.466	1.221
315.576	249.961	320.263	159.35	281.206	156.226	240.588	31.245	223.403	185.909	312.452	131.23	104.671	146.852	324.95		69.189	57.851	93.203	48.281	64.189	44.745	56.815	27.979	59.922	50.78	67.85	41.513	36.943	68.886	75.956		0.828	0.939	0.463	0.859	0.858	0.981	0.937	0.502	0.782	0.906	0.853	0.957	0.964	0.881	0.708		1.412	1.307
354.632	209.343	178.097	103.109	171.848	118.732	149.977	229.652	192.158	151.539	109.358	173.411	121.856	298.391	334.323		71.992	54.316	52.119	40.478	49.316	39.746	44.013	55.048	51.513	45.049	38.281	49.316	39.746	44.013	66.386		0.86	0.892	0.824	0.791	0.888	0.944	0.973	0.952	0.91	0.938	0.938	0.896	0.969	0.953	0.953		1.207	1.457
376.504	282.769	34.37	135.916	410.874	412.436	145.29	196.844	214.029	95.298	170.286	145.29	246.837	321.825	374.942		76.688	63.154	20.908	45.781	78.153	78.759	45.477	52.119	53.28	35.478	48.281	45.477	57.851	81.688	73.153		0.804	0.891	0.988	0.815	0.845	0.836	0.883	0.911	0.947	0.951	0.918	0.883	0.927	0.562	0.88		1.501	1.46
289.017	267.146	20.309	134.354	190.595	137.479	242.15	206.218	349.946	264.022	171.848	318.701	170.286	182.784	287.455		65.957	60.351	16.641	41.21	49.316	43.584	57.548	54.316	71.992	63.886	50.048	70.653	47.548	69.921	62.118		0.835	0.922	0.922	0.994	0.985	0.909	0.919	0.878	0.848	0.813	0.862	0.802	0.946	0.827	0.936		1.242	1.344
324.949	193.72	142.165	21.872	218.716	117.169	165.599	178.097	174.973	289.018	112.483	220.278	221.841	307.765	265.584		72.421	53.583	42.245	15.605	90.704	41.513	46.816	51.084	49.013	63.583	37.978	53.583	56.815	53.28	61.083		0.779	0.848	1	1	0.334	0.854	0.949	0.858	0.915	0.898	0.98	0.964	0.864	0.809	0.894		1.365	1.851
453.054	196.844	210.905	164.037	231.214	226.527	156.226	226.527	151.539	215.592	143.728	235.901	224.965	248.399	298.391		85.401	51.513	54.316	47.245	60.654	54.619	46.084	56.083	43.281	52.851	44.745	57.851	57.851	67.85	63.457		0.781	0.932	0.898	0.924	0.79	0.954	0.924	0.905	1	0.97	0.902	0.886	0.845	0.84	0.931		1.501	1.316
429.62	759.257	509.296	265.584	270.271	132.792	184.346	256.21	203.094	320.263	184.346	618.654	179.66	281.206	192.158		80.527	137.039	95.829	63.583	61.386	41.942	50.048	60.351	51.816	90.829	57.851	95.829	49.013	57.548	51.816		0.833	0.508	0.697	0.826	0.901	0.949	0.925	0.884	0.951	0.488	0.692	0.847	0.94	0.943	0.899		1.431	1.559
284.331	220.278	237.463	246.837	307.765	229.652	142.165	253.086	167.162	114.045	196.844	89.049	253.086	557.726	165.599		68.028	55.351	60.654	58.886	63.154	55.351	45.781	59.618	48.584	39.013	52.548	40.049	58.886	63.886	46.816		0.772	0.904	0.811	0.895	0.97	0.942	0.852	0.895	0.89	0.942	0.896	0.698	0.917	0.866	0.949		1.395	1.449
79.675	207.78	131.23	190.595	223.403	79.675	179.66	209.343	257.773	145.29	123.418	551.477	232.776	267.146	354.633		49.619	56.387	41.942	52.548	58.886	32.675	49.013	53.583	61.993	42.978	42.245	104.238	56.815	88.026	75.956		0.407	0.821	0.937	0.867	0.81	0.938	0.94	0.916	0.843	0.988	0.869	0.638	0.906	0.904	0.772		1.305	1.931
357.757	220.278	218.716	114.045	351.508	220.278	192.158	170.286	151.539	135.916	160.913	223.403	326.512	156.226	178.097		71.992	55.351	55.048	39.013	72.724	56.083	51.084	49.013	46.084	43.281	46.513	74.063	73.885	61.815	49.013		0.867	0.904	0.907	0.942	0.835	0.88	0.925	0.891	0.897	0.912	0.935	0.512	0.752	0.879	0.932		1.486	1.582
312.451	179.66	192.158	123.418	662.397	565.537	285.893	215.592	184.346	206.218	123.418	262.459	139.041	360.882	378.066		66.815	52.119	52.548	41.513	118.505	96.99	68.886	54.316	53.583	51.816	39.746	60.654	42.245	47.852	72.118		0.88	0.831	0.874	0.9	0.593	0.755	0.757	0.918	0.807	0.965	0.982	0.897	0.979	0.857	0.913		1.47	1.604
295.266	185.909	143.728	135.916	346.821	196.844	201.531	196.844	206.218	123.418	151.539	454.617	224.965	135.916	387.44		75.224	51.084	46.084	42.978	70.653	52.119	52.548	50.78	54.316	43.281	46.816	89.062	56.815	73.153	89.365		0.656	0.895	0.85	0.925	0.873	0.911	0.917	0.959	0.878	0.828	0.869	0.72	0.876	0.847	0.61		1.494	1.539
367.13	184.346	307.765	187.471	354.633	359.319	206.218	271.833	178.097	131.23	185.909	129.667	298.391	445.243	284.331		73.456	54.316	81.259	51.816	69.921	68.886	57.548	60.047	49.013	41.513	49.316	43.584	63.154	45.049	64.921		0.855	0.785	0.586	0.877	0.912	0.952	0.782	0.947	0.932	0.957	0.961	0.858	0.94	0.842	0.848		1.605	1.61
389.002	212.467	543.666	121.856	326.512	229.652	156.226	240.588	221.841	201.531	157.788	20.309	185.909	256.21	784.253		76.991	52.851	91.865	40.781	70.653	56.815	50.048	57.119	55.048	51.816	45.781	16.641	49.745	79.92	108.934		0.825	0.956	0.81	0.921	0.822	0.894	0.784	0.927	0.92	0.943	0.946	0.922	0.944	0.876	0.83		1.325	1.18
329.636	165.599	195.282	165.599	240.588	235.901	184.346	207.78	251.524	157.788	243.712	56.241	239.025	471.802	207.78		70.956	47.852	52.548	48.281	67.118	58.154	49.316	56.083	59.922	45.781	57.119	25.908	56.387	59.618	53.28		0.823	0.909	0.889	0.893	0.671	0.877	0.953	0.83	0.88	0.946	0.939	1	0.945	0.906	0.92		1.366	1.55
198.406	285.893	90.611	131.23	312.452	260.897	215.592	268.708	267.146	118.732	203.094	51.555	309.327	320.263	253.086		54.619	64.618	36.21	46.816	65.35	61.689	54.316	60.351	60.351	38.71	52.851	25.908	66.386	79.188	60.351		0.836	0.86	0.868	0.752	0.919	0.862	0.918	0.927	0.922	0.996	0.914	0.965	0.882	0.945	0.873		1.533	1.237
235.901	149.977	74.988	142.165	189.033	140.603	254.648	264.022	310.889	279.644	185.909	159.35	296.829	206.218	257.773		58.886	48.281	36.514	45.781	49.316	43.584	60.654	59.618	65.654	73.456	48.584	49.316	69.189	67.421	58.886		0.855	0.809	0.707	0.852	0.977	0.93	0.87	0.933	0.906	0.651	0.99	0.823	0.779	0.885	0.934		1.421	1.874
315.576	776.442	540.541	143.728	221.841	146.852	323.387	245.274	215.592	124.981	271.833	164.037	356.195	192.158	226.527		70.224	111.005	93.455	45.781	58.583	46.513	67.421	58.583	55.048	41.513	60.351	48.584	76.259	54.316	53.583		0.804	0.792	0.778	0.862	0.812	0.853	0.894	0.898	0.894	0.911	0.938	0.873	0.77	0.878	0.991		1.385	1.908
235.901	179.66	132.792	182.784	315.576	210.905	265.584	251.524	342.134	298.391	162.475	190.595	95.298	176.535	295.267		60.351	52.119	42.245	54.619	68.153	56.387	59.315	63.583	67.118	66.689	48.281	54.619	35.478	51.513	63.886		0.814	0.831	0.935	0.77	0.854	0.834	0.949	0.782	0.954	0.843	0.876	0.803	0.951	0.91	0.909		1.789	1.703
254.648	204.656	143.728	214.029	234.339	254.648	253.086	381.191	171.848	173.411	164.037	21.872	228.09	124.981	245.274		60.351	54.619	45.781	53.583	59.922	63.886	59.922	73.885	47.548	49.013	47.245	16.338	56.083	49.745	60.654		0.879	0.862	0.862	0.937	0.82	0.784	0.886	0.877	0.955	0.907	0.924	1	0.911	0.896	0.838		1.52	1.534
356.194	1001.41	237.463	118.732	306.203	724.888	274.957	204.656	281.206	131.23	204.656	243.712	309.327	293.704	685.831		72.421	122.166	69.618	41.942	66.992	100.828	64.618	52.119	62.118	42.245	53.28	72.421	67.85	42.245	149.893		0.853	0.843	0.616	0.848	0.857	0.896	0.827	0.947	0.916	0.924	0.906	0.584	0.844	0.88	0.384		1.211	1.542
210.905	440.557	71.864	121.856	226.527	535.854	201.531	607.718	265.584	276.52	153.101	370.255	292.142	129.667	278.082		58.154	85.526	31.211	42.549	56.387	87.723	51.816	95.829	60.654	71.992	48.281	80.223	66.082	65.654	65.654		0.784	0.757	0.927	0.846	0.895	0.875	0.943	0.832	0.907	0.67	0.825	0.723	0.841	0.856	0.811		1.96	1.912
124.98	224.965	335.885	140.603	182.784	289.018	229.652	228.09	35.932	145.29	187.471	345.259	435.87	482.738	185.909		46.084	55.048	78.027	44.013	51.816	65.654	55.351	56.083	20.605	45.477	51.084	72.421	77.42	41.817	50.048		0.74	0.933	0.693	0.912	0.856	0.843	0.942	0.911	1	0.883	0.903	0.827	0.914	0.932	0.933		1.462	1.276
160.912	224.965	301.516	131.23	231.214	212.467	199.969	215.592	270.271	170.286	199.969	20.309	334.323	182.784	567.1		55.654	56.815	63.583	42.978	56.083	52.851	51.816	56.083	67.85	48.281	52.548	14.873	69.189	91.561	92.294		0.653	0.876	0.937	0.893	0.924	0.956	0.936	0.861	0.738	0.918	0.91	1	0.878	0.724	0.837		1.353	1.592
215.591	317.138	29.683	129.667	226.527	99.985	203.094	240.588	506.172	151.539	184.346	171.848	312.452	131.23	137.479		54.316	70.224	25.176	43.584	59.19	37.246	52.851	56.815	85.223	44.013	51.816	60.225	68.582	50.78	45.781		0.918	0.808	0.589	0.858	0.813	0.906	0.914	0.937	0.876	0.983	0.863	0.595	0.835	0.891	0.824		1.311	1.415
143.728	259.335	206.218	204.656	710.827	270.271	178.097	228.09	196.844	139.041	204.656	29.683	209.343	149.977	463.991		50.351	60.351	54.744	54.012	98.329	59.618	50.048	56.387	51.513	45.352	52.548	22.676	53.28	44.013	79.188		0.712	0.895	0.865	0.882	0.924	0.956	0.893	0.901	0.932	0.849	0.931	0.725	0.927	0.851	0.93		2.325	1.581
137.479	268.708	256.21	129.667	220.278	432.745	173.411	248.399	206.218	279.644	192.158	37.494	420.247	212.467	174.973		49.619	60.351	61.386	42.245	55.351	80.223	48.584	57.851	56.387	79.795	51.387	21.64	76.259	48.584	53.583		0.702	0.927	0.854	0.913	0.904	0.845	0.923	0.933	0.815	0.552	0.914	1	0.908	0.798	0.766		2.341	1.364
151.539	190.595	260.897	134.354	168.724	421.81	229.652	164.037	226.527	129.667	182.784	39.056	132.792	157.788	124.981		45.049	51.816	62.118	43.281	50.351	76.688	56.815	47.548	56.512	40.781	51.513	22.676	41.513	54.012	42.549		0.938	0.892	0.85	0.901	0.836	0.901	0.894	0.912	0.891	0.98	0.866	0.954	0.968	0.915	0.868		1.351	1.475
112.482	198.407	231.214	153.101	176.535	421.81	199.969	209.343	296.829	121.856	179.66	156.226	376.504	239.025	215.592		39.746	51.816	62.85	45.781	49.316	79.92	53.583	52.548	63.583	39.317	49.316	48.281	74.492	46.513	54.922		0.895	0.929	0.736	0.918	0.912	0.83	0.875	0.953	0.923	0.991	0.928	0.842	0.853	0.917	0.898		1.214	1.221
278.082	337.448	299.954	190.595	267.146	210.905	164.037	187.471	256.21	214.029	143.728	170.286	237.463	228.09	217.154		71.992	76.688	64.921	51.816	60.047	53.28	50.048	50.78	60.351	53.583	45.781	50.048	64.921	56.083	54.619		0.674	0.721	0.894	0.892	0.931	0.934	0.823	0.914	0.884	0.937	0.862	0.854	0.708	0.955	0.915		2.365	1.48
145.29	195.282	176.535	253.086	249.961	204.656	198.407	185.909	178.097	134.354	154.664	90.611	184.346	314.014	229.652		46.21	51.084	98.203	57.851	56.815	52.851	52.548	51.816	49.013	41.817	47.245	35.478	49.316	58.583	56.083		0.855	0.94	0.23	0.95	0.973	0.921	0.903	0.87	0.932	0.966	0.871	0.905	0.953	0.835	0.918		1.691	1.379
148.414	171.848	298.391	246.837	282.769	201.531	228.09	196.844	187.471	265.584	214.029	234.339	187.471	107.796	303.078		47.119	47.548	67.118	63.457	63.886	53.583	56.815	52.548	50.78	61.815	53.583	58.886	50.351	67.85	64.921		0.84	0.955	0.832	0.77	0.871	0.882	0.888	0.896	0.914	0.873	0.937	0.849	0.929	0.857	0.904		1.398	1.159
159.35	231.214	226.527	151.539	246.837	588.971	168.724	271.833	284.331	204.656	268.708	114.045	846.744	340.572	187.471		47.852	57.548	57.119	46.816	57.119	97.9	50.048	61.386	63.886	52.548	62.118	40.781	114.666	40.478	52.548		0.875	0.877	0.873	0.869	0.951	0.772	0.846	0.907	0.875	0.931	0.875	0.862	0.809	0.827	0.853		1.706	1.43
187.471	234.339	1398.22	143.728	256.21	192.158	187.471	20.309	285.893	217.154	198.407	120.294	484.3	204.656	296.829		50.048	56.815	147.77	44.013	58.886	52.119	51.084	18.105	66.992	56.083	51.816	43.281	96.132	71.992	65.654		0.941	0.912	0.805	0.932	0.928	0.889	0.903	0.779	0.801	0.868	0.929	0.807	0.659	0.826	0.865		1.29	1.457
207.78	207.78	224.965	228.09	157.788	296.829	160.913	243.712	274.957	178.097	303.078	87.486	234.339	323.387	190.595		57.422	54.316	56.083	57.548	45.781	63.886	51.513	63.154	64.618	48.281	62.85	34.746	55.78	57.851	50.048		0.792	0.885	0.899	0.865	0.946	0.914	0.762	0.768	0.827	0.96	0.964	0.911	0.946	0.768	0.956		1.602	1.743
165.599	157.788	310.889	149.977	328.074	265.584	245.274	203.094	139.041	139.041	21.872	128.105	157.788	235.901	218.716		50.351	47.852	73.76	45.049	67.118	64.189	58.583	53.583	81.865	42.978	17.373	42.245	53.155	69.189	53.28		0.821	0.866	0.718	0.929	0.915	0.81	0.898	0.889	0.261	0.946	0.911	0.902	0.702	0.849	0.968		1.403	1.643
187.471	149.977	556.164	164.037	254.648	257.773	170.286	270.271	221.841	179.66	565.537	451.493	334.323	168.724	284.331		50.78	45.049	94.49	48.281	57.851	58.583	48.281	61.386	56.512	49.013	89.491	81.259	67.421	56.815	65.225		0.914	0.929	0.783	0.884	0.956	0.944	0.918	0.901	0.873	0.94	0.887	0.859	0.924	0.918	0.84		1.276	1.367
199.969	204.656	145.29	121.856	199.969	376.504	179.66	1027.97	210.905	189.033	229.652	21.872	517.107	228.09	181.222		54.619	53.583	44.316	41.817	52.548	74.921	51.084	154.286	80.098	49.013	55.351	16.641	90.097	46.513	48.281		0.842	0.896	0.93	0.876	0.91	0.843	0.865	0.543	0.413	0.989	0.942	0.993	0.801	0.98	0.977		1.399	1.256
128.105	151.539	651.462	151.539	115.607	203.094	218.716	240.588	203.094	187.471	181.222	307.765	409.312	151.539	260.897		44.013	50.048	97.597	45.781	39.746	53.155	54.619	58.583	53.28	51.084	51.084	69.921	76.259	56.083	60.047		0.831	0.76	0.859	0.909	0.92	0.903	0.921	0.881	0.899	0.903	0.873	0.791	0.884	0.911	0.909		1.93	1.811
117.169	187.471	165.599	146.852	159.35	287.455	135.916	156.226	478.051	276.52	173.411	95.298	74.988	204.656	593.658		40.049	50.78	48.281	45.477	47.548	62.118	43.71	48.584	81.688	62.85	50.048	38.281	31.943	44.013	91.258		0.918	0.914	0.893	0.892	0.886	0.936	0.894	0.832	0.9	0.88	0.87	0.817	0.924	0.983	0.896		1.574	1.105
154.663	204.656	292.142	162.475	223.403	226.527	174.973	132.792	223.403	164.037	304.64	210.905	96.86	215.592	274.957		45.781	51.816	63.457	46.084	53.583	57.422	50.048	43.281	57.851	46.513	67.421	55.351	37.246	56.387	62.85		0.927	0.958	0.912	0.961	0.978	0.863	0.878	0.891	0.839	0.953	0.842	0.865	0.877	0.809	0.875		1.555	1.361
171.848	190.595	274.957	164.037	201.531	245.274	267.146	232.776	151.539	131.23	276.52	312.452	110.92	195.282	470.24		48.28	50.78	61.083	51.209	52.548	57.119	61.386	57.422	45.781	41.513	63.583	69.492	38.281	53.28	80.956		0.926	0.929	0.926	0.786	0.917	0.945	0.891	0.887	0.909	0.957	0.86	0.813	0.951	0.954	0.902		1.408	1.242
131.229	387.44	399.938	139.041	218.716	273.395	210.905	543.666	126.543	124.981	171.848	648.337	190.595	360.882	195.282		42.549	71.689	75.956	46.513	54.619	65.957	55.351	89.062	42.549	40.478	49.013	139.11	50.048	54.012	51.816		0.911	0.947	0.871	0.808	0.921	0.79	0.865	0.861	0.878	0.959	0.899	0.421	0.956	0.841	0.914		1.423	1.082
120.294	265.584	110.92	132.792	256.21	253.086	284.331	118.732	232.776	156.226	174.973	174.973	74.988	307.765	413.998		39.013	61.083	43.71	46.942	59.618	62.85	65.957	51.084	57.851	46.513	50.048	53.583	34.443	70.956	75.653		0.993	0.894	0.73	0.757	0.906	0.805	0.821	0.572	0.874	0.907	0.878	0.766	0.794	0.901	0.909		1.212	1.415
118.731	157.788	301.516	249.961	249.961	239.025	215.592	178.097	167.162	146.852	343.697	49.992	174.973	223.403	314.014		41.817	45.477	69.921	57.851	58.583	57.851	56.512	50.048	80.797	44.745	67.118	25.176	49.316	65.957	66.992		0.853	0.959	0.775	0.939	0.915	0.897	0.848	0.893	0.322	0.922	0.959	0.991	0.904	0.889	0.879		1.741	1.081
139.041	251.524	356.195	182.784	289.018	206.218	217.154	204.656	226.527	124.981	218.716	249.961	148.414	354.633	334.323		42.549	57.119	70.956	54.012	64.189	52.851	53.583	52.548	55.351	41.817	54.012	62.85	46.513	57.548	69.189		0.965	0.969	0.889	0.787	0.881	0.928	0.95	0.931	0.929	0.898	0.942	0.795	0.862	0.848	0.878		1.366	1.212
193.72	339.01	287.455	167.162	196.844	565.537	159.35	151.539	176.535	145.29	221.841	35.932	78.113	164.037	198.407		51.084	69.921	61.083	46.513	51.816	105.702	46.513	46.513	48.584	44.316	54.012	51.084	32.246	72.421	51.513		0.933	0.871	0.968	0.971	0.921	0.636	0.926	0.88	0.94	0.93	0.956	0.173	0.944	0.85	0.94		1.372	1.549
134.354	268.708	865.491	143.728	254.648	312.452	178.097	317.138	164.037	140.603	332.761	328.074	109.358	140.603	215.592		45.352	61.386	197.693	45.781	57.851	81.991	50.78	72.724	47.548	45.049	69.189	85.401	37.978	50.048	54.619		0.821	0.896	0.278	0.862	0.956	0.584	0.868	0.754	0.912	0.871	0.874	0.565	0.953	0.823	0.908		1.522	1.15
124.98	328.074	415.561	148.414	185.909	604.594	221.841	246.837	153.101	162.475	181.222	164.037	259.335	245.274	610.843		43.584	67.118	76.688	48.281	50.351	99.49	54.316	60.351	49.316	46.513	49.316	47.548	61.386	47.245	93.026		0.827	0.915	0.888	0.8	0.921	0.768	0.945	0.852	0.791	0.944	0.936	0.912	0.865	0.792	0.887		1.944	1.078
174.973	307.765	310.889	134.354	284.331	274.957	223.403	482.738	184.346	132.792	226.527	62.49	24.996	184.346	389.002		50.048	65.957	65.35	44.013	61.386	61.083	56.083	85.223	55.351	40.781	54.619	28.711	18.408	57.119	73.885		0.878	0.889	0.915	0.872	0.948	0.926	0.893	0.835	0.756	1	0.954	0.953	0.927	0.945	0.895		1.525	1.619
121.856	212.467	446.806	159.35	184.346	171.848	178.097	178.097	179.66	170.286	189.033	137.479	446.806	145.29	173.411		42.245	54.316	79.491	47.548	50.78	47.977	50.78	49.619	53.155	48.281	49.316	87.472	86.259	50.048	47.245		0.858	0.905	0.889	0.886	0.898	0.938	0.868	0.909	0.799	0.918	0.977	0.226	0.755	0.925	0.976		1.634	1.501
132.792	326.512	542.103	151.539	178.097	224.965	168.724	235.901	189.033	137.479	189.033	20.309	318.701	134.354	20.309		44.745	65.35	86.259	48.584	49.316	57.119	48.281	57.851	53.583	42.245	50.048	26.943	70.653	45.049	14.873		0.833	0.961	0.916	0.807	0.92	0.867	0.91	0.886	0.827	0.968	0.948	0.352	0.802	0.9	1		1.815	1.12
140.603	534.292	385.878	114.045	170.286	212.467	268.708	176.535	185.909	229.652	203.094	162.475	396.813	296.829	281.206		46.21	87.723	78.027	39.442	46.816	53.28	60.78	48.584	80.83	56.083	51.816	50.78	76.259	40.781	63.886		0.827	0.872	0.796	0.921	0.976	0.941	0.914	0.94	0.358	0.918	0.951	0.792	0.857	1	0.866		1.859	1.388
135.916	193.72	299.954	199.969	215.592	268.708	154.664	179.66	243.712	134.354	226.527	182.784	223.403	156.226	268.708		50.351	52.851	63.154	52.851	54.316	59.315	46.816	49.013	70.528	43.281	54.619	50.351	53.583	65.35	62.422		0.674	0.872	0.945	0.9	0.918	0.96	0.887	0.94	0.616	0.901	0.954	0.906	0.978	0.873	0.867		2.57	1.663
128.105	293.704	248.399	159.35	262.459	426.496	184.346	196.844	189.033	167.162	224.965	440.557	198.407	295.267	187.471		41.513	63.154	59.315	46.513	59.618	96.132	51.084	50.78	50.048	47.548	56.083	89.491	51.816	47.548	51.084		0.934	0.925	0.887	0.926	0.928	0.58	0.888	0.959	0.948	0.929	0.899	0.691	0.929	0.868	0.903		1.335	1.312
231.214	224.965	342.134	135.916	303.078	189.033	278.082	195.282	421.81	148.414	332.761	160.913	204.656	320.263	176.535		59.922	55.351	69.921	43.281	64.921	51.513	63.886	50.351	76.992	45.781	67.421	50.655	51.816	73.456	50.78		0.809	0.923	0.879	0.912	0.904	0.895	0.856	0.968	0.894	0.89	0.92	0.788	0.958	0.688	0.86		1.468	1.304
215.591	193.72	218.716	174.973	253.086	234.339	174.973	264.022	182.784	170.286	257.773	443.681	154.664	248.399	185.909		54.316	50.78	56.387	50.048	58.886	58.886	50.351	91.436	72.295	47.548	58.583	83.027	44.745	76.992	50.048		0.918	0.944	0.864	0.878	0.917	0.849	0.867	0.397	0.439	0.946	0.944	0.809	0.971	0.679	0.933		1.285	1.291
203.093	185.909	282.769	237.463	196.844	232.776	143.728	390.564	203.094	137.479	210.905	624.903	387.44	381.191	21.872		52.548	50.048	75.956	57.119	50.78	57.548	44.013	73.76	53.887	43.281	52.548	96.132	71.689	58.154	15.605		0.924	0.933	0.616	0.915	0.959	0.883	0.932	0.902	0.879	0.922	0.96	0.85	0.947	0.923	1		1.224	1.334
156.226	174.973	254.648	184.346	199.969	168.724	271.833	284.331	74.988	209.343	201.531	26.558	149.977	151.539	201.531		52.119	48.281	60.351	50.78	54.922	54.619	62.118	63.154	32.246	52.119	51.084	19.141	43.281	73.885	51.816		0.723	0.943	0.879	0.898	0.833	0.711	0.885	0.896	0.906	0.968	0.97	0.911	1	0.877	0.943		2.407	1.298
198.406	318.701	257.773	165.599	296.829	265.584	153.101	281.206	140.603	356.195	170.286	224.965	273.395	760.82	417.123		51.084	64.921	61.386	47.245	62.85	62.85	45.049	63.583	63.583	82.294	49.013	57.548	63.886	58.154	76.385		0.955	0.95	0.86	0.932	0.944	0.845	0.948	0.874	0.437	0.661	0.891	0.854	0.842	0.563	0.898		1.267	1.084
121.856	157.788	342.134	129.667	229.652	20.309	128.105	181.222	34.37	160.913	143.728	64.053	193.72	240.588	317.138		45.352	45.049	69.189	42.978	56.815	15.605	42.245	50.048	36.085	48.281	44.013	31.943	51.084	106.56	66.386		0.745	0.977	0.898	0.882	0.894	1	0.902	0.909	0.332	0.867	0.932	0.789	0.933	0.842	0.904		2.408	1.268
203.093	195.282	367.131	112.483	229.652	245.274	287.455	359.319	167.162	151.539	187.471	112.483	224.965	328.074	201.531		52.851	52.851	127.988	44.316	56.083	58.886	63.154	80.527	48.281	44.316	50.78	41.817	57.119	56.083	51.816		0.914	0.879	0.282	0.72	0.918	0.889	0.906	0.696	0.901	0.97	0.914	0.808	0.867	0.961	0.943		1.221	1.55
149.977	234.339	292.142	115.607	268.708	207.78	184.346	276.52	207.78	131.23	173.411	242.15	182.784	232.776	156.226		47.852	57.851	123.885	40.049	60.78	52.548	50.477	62.85	56.083	40.781	48.281	82.169	53.28	67.724	46.513		0.823	0.88	0.239	0.906	0.914	0.946	0.909	0.88	0.83	0.992	0.935	0.451	0.809	0.899	0.907		1.435	1.407
235.901	164.037	192.158	143.728	295.267	196.844	151.539	278.082	132.792	301.516	232.776	35.932	320.263	162.475	189.033		59.618	53.583	56.083	45.781	66.689	51.816	45.781	63.583	80.83	72.421	57.119	20.605	66.386	61.386	50.78		0.834	0.718	0.768	0.862	0.834	0.921	0.909	0.864	0.255	0.722	0.897	1	0.913	0.776	0.921		1.087	1.373
165.599	206.218	231.214	192.158	214.029	248.399	198.407	487.424	192.158	164.037	176.535	204.656	228.09	442.119	282.769		49.316	52.851	67.724	50.048	54.316	61.689	52.245	103.203	51.084	46.084	49.745	52.851	56.387	45.049	70.956		0.856	0.928	0.633	0.964	0.912	0.82	0.913	0.575	0.925	0.971	0.896	0.921	0.901	1	0.706		1.743	1.429
145.29	212.467	193.72	167.162	173.411	248.399	160.913	157.788	440.557	387.44	164.037	571.786	204.656	268.708	156.226		48.28	53.583	54.19	47.852	47.245	58.583	45.781	45.781	80.223	73.153	45.781	104.97	53.28	79.92	46.21		0.783	0.93	0.829	0.917	0.976	0.91	0.965	0.946	0.86	0.91	0.984	0.652	0.906	0.87	0.919		1.892	1.166
179.659	198.407	209.343	129.667	268.708	653.024	151.539	199.969	392.127	267.146	162.475	28.121	235.901	196.844	360.882		48.28	51.084	53.583	40.478	61.386	103.632	46.816	51.084	91.561	61.083	46.816	20.908	59.618	61.386	68.886		0.969	0.955	0.916	0.995	0.896	0.764	0.869	0.963	0.588	0.9	0.932	0.808	0.834	0.896	0.956		1.244	1.4
134.354	596.782	221.841	189.033	185.909	174.973	274.957	189.033	289.018	117.169	160.913	409.312	240.588	210.905	248.399		45.049	91.258	60.78	52.245	50.78	54.316	63.583	49.316	69.189	39.013	45.781	85.526	56.815	53.887	58.583		0.832	0.9	0.755	0.87	0.906	0.745	0.855	0.977	0.759	0.967	0.965	0.703	0.937	0.852	0.91		1.728	1.058
159.35	274.957	289.018	148.414	292.142	237.463	134.354	443.681	201.531	131.23	265.584	178.097	187.471	32.807	492.111		48.584	60.351	63.886	45.477	66.082	57.548	44.442	79.188	53.583	42.549	61.083	48.281	49.316	54.316	85.955		0.848	0.949	0.89	0.902	0.841	0.901	0.855	0.889	0.882	0.911	0.894	0.96	0.969	0.898	0.837		1.57	1.219
167.161	323.387	157.788	145.29	312.452	285.893	207.78	278.082	195.282	132.792	498.36	210.905	228.09	162.475	265.584		47.548	74.188	46.513	45.049	64.618	93.026	52.851	67.85	51.084	40.781	89.794	54.619	57.422	22.676	63.154		0.929	0.738	0.917	0.9	0.94	0.415	0.935	0.759	0.94	1	0.777	0.888	0.869	0.802	0.837		1.477	1.295
189.033	157.788	160.913	132.792	204.656	257.773	253.086	249.961	209.343	140.603	179.66	31.245	171.848	185.909	224.965		51.816	48.584	46.084	42.245	52.851	57.851	60.047	59.618	55.351	44.013	49.013	19.873	49.013	45.781	58.154		0.885	0.84	0.952	0.935	0.921	0.968	0.882	0.884	0.859	0.912	0.94	0.994	0.899	0.974	0.836		1.397	1.523
249.961	298.391	146.852	159.35	210.905	262.459	228.09	223.403	178.097	243.712	259.335	106.234	393.689	189.033	43.743		58.886	64.189	47.852	47.548	51.816	60.047	57.548	55.351	50.048	60.351	59.922	40.478	80.223	48.584	25.176		0.906	0.91	0.806	0.886	0.987	0.915	0.865	0.916	0.893	0.841	0.908	0.815	0.769	0.99	0.867		1.504	1.336
215.591	404.625	245.274	201.531	187.471	215.592	143.728	226.527	260.897	145.29	178.097	210.905	146.852	274.957	318.701		56.512	102.167	57.851	52.851	50.78	56.69	45.781	54.619	62.422	43.281	47.548	54.619	44.316	51.084	72.295		0.848	0.487	0.921	0.907	0.914	0.843	0.862	0.954	0.841	0.975	0.99	0.888	0.94	0.91	0.766		1.535	2.147
248.399	260.897	260.897	164.037	324.95	378.066	174.973	170.286	295.267	204.656	170.286	35.932	274.957	140.603	234.339		57.119	57.851	59.618	48.281	67.724	79.188	51.084	50.78	70.528	51.084	47.548	21.944	64.618	64.189	57.851		0.957	0.98	0.922	0.884	0.89	0.758	0.843	0.83	0.746	0.986	0.946	0.938	0.827	0.839	0.88		1.127	1.096
203.093	337.448	239.025	151.539	168.724	259.335	209.343	110.92	184.346	140.603	184.346	178.097	167.162	326.512	151.539		55.654	67.421	56.083	46.816	49.619	58.886	52.548	39.746	52.548	42.245	49.013	50.351	47.548	45.477	45.477		0.824	0.933	0.955	0.869	0.861	0.94	0.953	0.882	0.839	0.99	0.964	0.883	0.929	0.854	0.921		1.332	1.384
248.399	209.343	453.055	145.29	190.595	281.206	129.667	171.848	204.656	167.162	159.35	35.932	318.701	267.146	114.045		63.154	55.351	87.294	46.513	51.816	62.118	44.013	50.048	52.548	48.584	45.781	23.408	67.421	66.386	42.245		0.783	0.859	0.747	0.844	0.892	0.916	0.841	0.862	0.931	0.89	0.955	0.824	0.881	0.931	0.803		1.505	1.855
251.523	160.913	160.913	132.792	184.346	26.558	149.977	307.765	268.708	157.788	167.162	253.086	428.059	154.664	370.255		58.583	46.513	47.548	42.549	50.048	17.373	45.781	66.386	64.618	46.513	46.816	60.351	84.188	59.618	72.421		0.921	0.935	0.894	0.922	0.925	1	0.899	0.878	0.809	0.917	0.958	0.873	0.759	0.944	0.887		1.497	1.409
139.041	248.399	187.471	164.037	224.965	529.605	160.913	154.664	218.716	160.913	148.414	109.358	149.977	240.588	285.893		49.745	57.851	52.851	49.013	55.048	116.308	47.548	45.781	54.619	46.513	45.781	41.21	45.049	48.281	68.457		0.706	0.933	0.843	0.858	0.933	0.492	0.894	0.927	0.921	0.935	0.89	0.809	0.929	0.834	0.767		2.462	1.425
117.169	249.961	178.097	251.524	234.339	196.844	304.64	168.724	663.96	124.981	259.335	534.292	285.893	167.162	462.428		39.746	58.583	49.316	58.583	59.922	54.619	64.618	47.548	106.006	40.781	58.583	100.4	64.492	60.957	81.259		0.932	0.915	0.92	0.921	0.82	0.829	0.917	0.938	0.742	0.944	0.95	0.666	0.864	0.814	0.88		1.494	1.568
160.912	234.339	643.65	220.278	195.282	267.146	170.286	303.078	270.271	131.23	279.644	134.354	370.255	204.656	315.576		48.584	55.78	120.272	57.119	53.583	62.85	49.316	63.886	61.386	41.513	61.386	42.549	74.188	46.816	66.082		0.857	0.946	0.559	0.848	0.855	0.85	0.88	0.933	0.901	0.957	0.933	0.933	0.845	0.958	0.908		1.587	1.259
192.157	317.138	259.335	164.037	192.158	292.142	143.728	201.531	434.308	159.35	157.788	109.358	206.218	256.21	135.916		54.316	64.921	58.886	48.281	51.084	62.85	45.781	52.548	88.026	49.316	47.548	38.71	52.548	55.654	49.316		0.818	0.946	0.94	0.884	0.925	0.929	0.862	0.917	0.704	0.823	0.877	0.917	0.938	0.83	0.702		1.748	1.232
120.294	306.203	346.821	134.354	234.339	207.78	199.969	149.977	220.278	184.346	192.158	46.868	224.965	301.516	371.817		40.049	64.618	72.421	42.245	55.78	53.583	53.28	54.922	70.224	49.013	50.78	27.979	56.815	59.618	73.456		0.942	0.922	0.831	0.946	0.946	0.909	0.885	0.625	0.561	0.964	0.936	0.752	0.876	0.906	0.866		1.509	1.282
182.784	314.014	79.675	157.788	142.165	165.599	160.913	196.844	298.391	131.23	274.957	231.214	231.214	107.796	310.889		49.316	65.654	32.675	49.013	42.549	46.816	47.548	52.548	66.386	42.245	61.815	57.851	57.119	66.689	67.118		0.944	0.915	0.938	0.825	0.987	0.949	0.894	0.896	0.851	0.924	0.904	0.868	0.891	0.852	0.867		1.43	1.476
223.403	543.666	257.773	167.162	167.162	132.792	170.286	242.15	360.882	156.226	192.158	224.965	231.214	306.203	221.841		54.316	112.899	84.669	48.584	49.316	44.745	49.316	60.351	74.188	46.816	50.048	57.548	59.315	39.746	56.387		0.952	0.536	0.452	0.89	0.864	0.833	0.88	0.835	0.824	0.896	0.964	0.854	0.826	0.857	0.877		1.376	2.109
196.844	399.938	21.872	151.539	154.664	210.905	123.418	212.467	59.366	132.792	240.588	282.769	403.063	601.469	334.323		51.512	81.991	20.176	44.013	49.316	54.619	40.478	56.512	27.676	41.513	57.548	71.992	82.42	65.35	68.457		0.932	0.748	0.675	0.983	0.799	0.888	0.947	0.836	0.974	0.968	0.913	0.686	0.746	0.901	0.896		1.426	1.525
170.286	26.558	218.716	134.354	203.094	218.716	142.165	167.162	79.675	513.983	251.524	287.455	132.792	237.463	168.724		51.084	18.408	54.316	44.745	52.548	53.583	47.245	50.351	49.923	85.955	58.583	64.921	41.21	97.9	49.013		0.82	0.985	0.932	0.843	0.924	0.957	0.8	0.829	0.402	0.874	0.921	0.857	0.983	0.789	0.883		1.691	1.25
149.977	206.218	120.294	148.414	254.648	171.848	120.294	267.146	601.469	190.595	279.644	62.49	249.961	249.961	253.086		44.745	53.583	40.478	49.619	58.583	52.851	42.549	64.189	91.561	52.548	62.118	35.781	59.922	56.083	62.422		0.941	0.903	0.923	0.758	0.932	0.773	0.835	0.815	0.902	0.867	0.911	0.613	0.875	0.949	0.816		1.444	1.502
151.539	210.905	274.957	171.848	181.222	278.082	184.346	201.531	223.403	210.905	220.278	351.508	376.504	159.35	101.547		49.013	55.78	65.225	50.048	49.013	63.154	50.78	52.548	54.619	53.28	53.583	69.921	73.153	59.19	37.978		0.793	0.852	0.812	0.862	0.948	0.876	0.898	0.917	0.941	0.934	0.964	0.904	0.884	0.897	0.885		2.031	1.775
184.346	320.263	192.158	187.471	165.599	295.267	224.965	196.844	259.335	157.788	346.821	206.218	212.467	156.226	884.238		53.154	65.654	53.583	52.245	47.852	66.386	55.351	51.084	59.618	45.049	69.921	52.851	52.851	45.781	135.575		0.82	0.934	0.841	0.863	0.909	0.842	0.923	0.948	0.917	0.977	0.891	0.928	0.956	0.955	0.605		2.021	1.137
174.973	340.572	248.399	160.913	201.531	418.685	139.041	199.969	271.833	193.72	159.35	192.158	240.588	387.44	193.72		49.316	69.921	59.19	47.548	51.816	78.027	45.049	53.583	89.794	50.048	48.281	53.887	59.315	47.548	51.513		0.904	0.875	0.891	0.894	0.943	0.864	0.861	0.875	0.424	0.972	0.859	0.832	0.859	0.868	0.917		1.382	1.359
192.157	214.029	237.463	132.792	214.029	364.006	143.728	184.346	278.082	170.286	160.913	243.712	245.274	651.462	245.274		52.548	56.387	56.083	42.245	54.316	79.491	47.852	49.013	61.083	49.316	47.548	57.851	58.886	76.259	63.457		0.874	0.846	0.949	0.935	0.912	0.724	0.789	0.964	0.937	0.88	0.894	0.915	0.889	0.837	0.765		1.542	1.649
128.105	153.101	149.977	224.965	226.527	218.716	115.607	273.395	187.471	134.354	334.323	132.792	353.07	128.105	456.179		42.978	46.816	44.013	58.886	60.047	52.548	41.084	66.386	54.19	41.942	68.457	41.817	70.653	107.899	114.237		0.872	0.878	0.973	0.815	0.789	0.995	0.861	0.78	0.802	0.96	0.896	0.954	0.889	0.703	0.439		1.635	1.46
173.41	226.527	421.81	142.165	156.226	362.444	215.592	249.961	203.094	193.72	164.037	131.23	237.463	301.516	343.697		49.619	56.387	94.793	44.745	46.816	70.653	54.619	60.351	52.548	51.387	45.781	41.513	60.047	45.049	82.294		0.885	0.895	0.59	0.892	0.896	0.912	0.908	0.862	0.924	0.922	0.984	0.957	0.828	0.793	0.638		1.355	1.443
210.905	253.086	579.598	301.516	203.094	45.305	221.841	234.339	328.074	184.346	212.467	159.35	140.603	176.535	93.735		55.048	59.618	92.294	64.921	50.78	25.176	56.512	57.851	68.457	50.048	54.619	47.119	44.745	65.35	36.817		0.875	0.895	0.855	0.899	0.99	0.898	0.873	0.88	0.88	0.925	0.895	0.902	0.882	0.887	0.869		1.551	1.399
231.214	267.146	182.784	181.222	115.607	193.72	187.471	384.315	23.434	268.708	293.704	221.841	106.234	237.463	232.776		57.548	60.654	52.119	48.584	37.978	50.048	50.048	81.991	16.641	59.618	67.85	56.083	40.781	49.316	58.28		0.877	0.913	0.846	0.965	1	0.972	0.941	0.718	1	0.95	0.802	0.886	0.803	0.912	0.861		1.711	1.166
114.045	232.776	289.018	149.977	324.95	295.267	171.848	215.592	187.471	153.101	317.138	174.973	228.09	164.037	203.094		41.817	56.083	64.921	46.513	67.118	73.331	50.351	54.619	49.013	45.049	65.654	51.387	55.351	60.78	53.887		0.82	0.93	0.862	0.871	0.906	0.69	0.852	0.908	0.981	0.948	0.925	0.833	0.936	0.808	0.879		1.918	1.373
182.784	206.218	440.557	140.603	334.323	468.677	303.078	276.52	360.882	143.728	187.471	101.547	365.568	384.315	314.014		51.084	52.851	135.02	44.745	81.259	93.632	70.653	63.583	74.188	44.745	49.013	39.317	75.956	47.245	67.421		0.88	0.928	0.304	0.882	0.636	0.672	0.763	0.86	0.824	0.902	0.981	0.826	0.796	0.924	0.868		1.555	1.356
170.286	268.708	721.763	204.656	176.535	212.467	142.165	157.788	292.142	157.788	162.475	128.105	228.09	340.572	237.463		49.316	62.118	100.828	54.619	48.584	53.28	45.049	45.781	62.547	45.781	48.281	46.084	55.351	73.456	58.583		0.88	0.875	0.892	0.862	0.94	0.941	0.88	0.946	0.938	0.946	0.876	0.758	0.936	0.895	0.869		1.364	1.374
167.161	229.652	434.308	126.543	317.138	206.218	220.278	195.282	332.761	156.226	199.969	134.354	207.78	229.652	148.414		46.816	57.851	80.527	46.084	73.582	54.316	54.619	51.084	69.921	48.584	51.513	46.084	54.619	68.153	50.655		0.958	0.862	0.842	0.749	0.736	0.878	0.928	0.94	0.855	0.832	0.947	0.795	0.875	0.921	0.727		1.178	1.469
145.29	257.773	237.463	173.411	165.599	235.901	190.595	818.623	231.214	207.78	660.835	98.422	218.716	346.821	374.942		44.316	61.083	59.922	48.709	47.852	57.851	50.477	106.131	57.851	53.583	99.364	49.316	55.048	57.119	76.385		0.93	0.868	0.831	0.918	0.909	0.886	0.94	0.913	0.868	0.909	0.841	0.509	0.907	0.885	0.808		1.19	1.534
87.486	303.078	321.825	153.101	207.78	320.263	265.584	434.308	229.652	90.611	198.407	71.864	181.222	189.033	346.821		33.711	64.189	74.188	46.513	52.851	68.886	60.654	75.653	55.351	36.514	51.816	32.978	51.084	69.921	153.732		0.967	0.924	0.735	0.889	0.935	0.848	0.907	0.954	0.942	0.854	0.929	0.83	0.873	0.891	0.184		1.078	1.316
171.848	167.162	81.237	264.022	228.09	40.619	190.595	135.916	610.843	164.037	151.539	185.909	456.179	249.961	318.701		50.351	47.548	40.049	59.315	56.083	22.676	50.048	41.513	98.329	46.816	47.852	53.887	89.491	50.048	68.153		0.852	0.929	0.636	0.943	0.911	0.993	0.956	0.991	0.794	0.941	0.832	0.805	0.716	0.948	0.862		1.442	1.444
167.161	193.72	173.411	135.916	170.286	210.905	162.475	265.584	228.09	146.852	165.599	184.346	293.704	242.15	26.558		52.548	51.084	79.491	45.049	47.548	54.619	46.513	62.547	56.083	44.316	46.513	50.78	73.456	58.886	21.64		0.761	0.933	0.345	0.842	0.946	0.888	0.944	0.853	0.911	0.94	0.962	0.898	0.684	0.906	0.713		2.085	1.404
174.973	195.282	184.346	62.49	176.535	390.564	209.343	303.078	195.282	153.101	203.094	185.909	237.463	168.724	135.916		47.548	51.816	52.548	49.619	49.316	72.421	53.583	64.618	55.048	45.781	52.245	51.084	64.315	57.851	42.245		0.973	0.914	0.839	0.319	0.912	0.936	0.916	0.912	0.81	0.918	0.935	0.895	0.721	0.909	0.957		1.195	1.51
148.414	237.463	260.897	76.551	699.892	207.78	139.041	482.738	212.467	199.969	307.765	139.041	178.097	82.8	259.335		45.781	56.387	73.885	56.993	101.864	55.048	45.781	92.597	59.19	52.851	66.689	42.978	48.584	47.977	59.618		0.89	0.939	0.601	0.296	0.848	0.862	0.834	0.708	0.762	0.9	0.87	0.946	0.948	0.921	0.917		1.451	1.346
159.35	234.339	121.856	103.109	446.806	306.203	171.848	190.595	18.747	153.101	307.765	203.094	221.841	209.343	24.996		46.816	57.119	42.978	42.549	97.293	68.153	46.513	52.548	86.789	45.049	76.259	52.851	55.351	35.478	21.944		0.914	0.903	0.829	0.716	0.593	0.828	0.998	0.867	0.031	0.948	0.665	0.914	0.91	0.827	0.652		1.607	1.273
171.848	274.957	306.203	106.234	368.693	178.097	206.218	221.841	198.407	159.35	442.119	209.343	240.588	146.852	285.893		49.745	62.118	70.224	37.978	71.385	50.351	52.851	55.048	55.048	48.281	88.758	55.654	57.119	52.851	62.118		0.873	0.895	0.78	0.926	0.909	0.883	0.928	0.92	0.823	0.859	0.705	0.849	0.927	0.942	0.931		1.634	1.337
184.346	289.018	453.055	34.37	237.463	245.274	173.411	153.101	520.232	140.603	215.592	204.656	89.049	257.773	273.395		51.084	63.583	90.097	34.746	58.154	57.851	47.548	46.084	85.223	44.316	53.28	55.351	33.711	51.513	61.083		0.888	0.898	0.701	0.358	0.882	0.921	0.964	0.906	0.9	0.9	0.954	0.839	0.985	0.695	0.921		1.453	1.583
212.467	206.218	253.086	89.049	187.471	178.097	95.298	137.479	159.35	342.134	315.576	184.346	198.407	198.407	231.214		53.28	52.119	62.725	36.21	51.816	50.78	36.21	45.781	47.548	84.794	69.189	50.351	52.548	62.118	56.815		0.941	0.954	0.808	0.853	0.877	0.868	0.913	0.824	0.886	0.598	0.828	0.914	0.903	0.839	0.9		1.262	1.257
98.422	279.644	43.743	351.508	192.158	481.175	192.158	182.784	146.852	137.479	193.72	468.677	168.724	187.471	185.909		36.21	62.85	24.444	68.886	50.78	87.294	51.816	50.048	46.816	42.549	51.816	83.455	47.548	51.513	58.761		0.943	0.89	0.92	0.931	0.936	0.793	0.899	0.917	0.842	0.954	0.907	0.846	0.938	0.94	0.677		1.593	1.421
260.897	268.708	174.973	120.294	276.52	515.545	193.72	315.576	224.965	140.603	182.784	215.592	196.844	98.422	345.259		61.386	59.315	49.013	44.316	61.386	86.259	51.084	65.654	55.78	44.013	48.281	55.654	52.119	49.013	74.188		0.87	0.96	0.915	0.77	0.922	0.871	0.933	0.92	0.909	0.912	0.985	0.875	0.911	0.981	0.788		1.607	1.217
165.599	239.025	253.086	139.041	131.23	404.625	135.916	284.331	162.475	328.074	193.72	215.592	404.625	215.592	232.776		49.013	57.119	85.097	46.084	42.978	76.992	42.245	68.457	46.816	69.189	51.084	65.654	76.688	36.943	55.048		0.866	0.921	0.439	0.823	0.893	0.858	0.957	0.762	0.932	0.861	0.933	0.629	0.865	0.906	0.965		1.754	1.251
282.768	342.134	290.58	93.735	364.006	274.957	212.467	265.584	337.448	209.343	215.592	240.588	106.234	179.66	242.15		76.991	67.118	67.421	37.549	86.259	61.386	54.316	61.083	69.314	54.619	52.851	60.047	37.978	55.351	57.119		0.599	0.954	0.803	0.835	0.615	0.917	0.905	0.894	0.883	0.882	0.97	0.838	0.926	0.884	0.933		2.316	1.207
143.728	254.648	253.086	132.792	306.203	151.539	181.222	298.391	185.909	151.539	232.776	46.868	110.92	210.905	298.391		44.013	59.922	60.351	44.316	69.189	45.781	49.745	63.583	51.084	48.887	55.048	27.979	38.71	48.281	64.921		0.932	0.891	0.873	0.85	0.804	0.909	0.92	0.928	0.895	0.797	0.965	0.752	0.93	0.969	0.89		1.21	1.364
170.286	232.776	193.72	99.985	271.833	435.87	153.101	160.913	281.206	135.916	164.037	245.274	160.913	290.58	488.987		50.351	56.083	51.816	37.675	64.189	78.456	46.816	46.816	62.118	44.316	47.852	58.583	51.084	52.548	82.42		0.844	0.93	0.907	0.885	0.829	0.89	0.878	0.923	0.916	0.87	0.9	0.898	0.775	0.96	0.905		1.673	1.207
173.41	209.343	198.407	149.977	320.263	193.72	121.856	204.656	185.909	162.475	120.294	228.09	182.784	74.988	242.15		49.013	55.351	53.28	45.049	69.492	52.851	41.513	52.851	51.816	45.781	40.781	58.886	49.013	72.295	58.583		0.907	0.859	0.878	0.929	0.833	0.872	0.889	0.921	0.87	0.974	0.909	0.827	0.956	0.699	0.887		1.391	1.352
134.354	265.584	231.214	128.105	182.784	234.339	209.343	389.002	271.833	139.041	146.852	548.353	123.418	267.146	207.78		42.245	60.351	56.083	41.513	50.351	56.083	55.048	73.456	63.583	43.281	44.316	91.865	43.281	33.711	52.548		0.946	0.916	0.924	0.934	0.906	0.936	0.868	0.906	0.845	0.933	0.94	0.817	0.828	0.829	0.946		1.43	1.358
139.041	248.399	215.592	128.105	314.014	279.644	167.162	262.459	151.539	167.162	131.23	165.599	120.294	206.218	379.629		43.281	57.851	55.351	44.013	65.654	62.118	49.013	61.083	47.245	48.281	42.549	47.977	41.21	61.689	76.385		0.933	0.933	0.884	0.831	0.915	0.911	0.874	0.884	0.853	0.901	0.911	0.904	0.89	0.882	0.818		1.52	1.231
118.731	245.274	195.282	120.294	232.776	248.399	185.909	368.693	237.463	176.535	190.595	162.475	124.981	193.72	107.796		40.781	58.154	51.084	42.245	56.083	58.886	49.013	76.688	56.083	48.584	50.78	47.548	41.21	53.887	39.013		0.897	0.911	0.94	0.847	0.93	0.9	0.973	0.788	0.949	0.94	0.929	0.903	0.925	0.892	0.89		1.648	1.411
124.98	339.01	284.331	135.916	170.286	423.372	237.463	151.539	431.183	153.101	178.097	314.014	132.792	256.21	215.592		40.049	70.224	62.118	44.013	47.548	242.166	60.654	49.013	76.688	46.513	48.584	79.366	43.584	55.351	53.583		0.979	0.864	0.926	0.882	0.946	0.091	0.811	0.793	0.921	0.889	0.948	0.626	0.878	0.795	0.944		1.249	1.325
199.969	276.52	281.206	160.913	187.471	467.115	209.343	315.576	285.893	170.286	251.524	206.218	217.154	164.037	292.142		53.28	61.083	62.85	51.387	50.048	83.759	53.28	66.386	65.654	46.816	58.583	53.887	56.083	63.154	65.957		0.885	0.931	0.895	0.766	0.941	0.837	0.927	0.9	0.833	0.976	0.921	0.892	0.868	0.807	0.844		1.536	1.078
293.704	309.327	326.512	164.037	210.905	235.901	201.531	184.346	242.15	142.165	131.23	198.407	190.595	167.162	378.066		88.884	65.35	99.239	50.048	51.816	56.083	54.012	51.084	58.28	44.013	44.013	55.654	49.316	48.281	81.259		0.467	0.91	0.417	0.823	0.987	0.942	0.868	0.888	0.896	0.922	0.851	0.805	0.985	0.884	0.72		3.121	1.387
154.663	189.033	182.784	114.045	293.704	235.901	257.773	187.471	195.282	120.294	103.109	307.765	332.761	212.467	237.463		45.781	51.084	50.048	39.013	64.921	61.386	58.886	50.78	51.816	40.781	38.281	66.689	70.224	45.781	58.886		0.927	0.91	0.917	0.942	0.876	0.787	0.934	0.914	0.914	0.909	0.884	0.87	0.848	1	0.861		1.566	1.421
146.852	256.21	39.056	85.924	217.154	170.286	196.844	234.339	201.531	117.169	673.333	174.973	140.603	259.335	198.407		46.816	59.315	21.64	36.514	56.387	48.281	52.119	59.922	51.816	41.513	98.632	51.084	42.245	58.154	57.422		0.842	0.915	1	0.81	0.858	0.918	0.911	0.82	0.943	0.854	0.87	0.843	0.99	0.789	0.756		1.941	1.349
139.041	232.776	349.946	107.796	329.636	164.037	124.981	195.282	321.825	120.294	257.773	57.804	285.893	223.403	295.267		42.549	56.387	165.131	37.978	75.224	47.548	43.281	53.583	68.153	39.746	59.618	29.014	64.189	59.618	65.654		0.965	0.92	0.161	0.939	0.732	0.912	0.838	0.855	0.871	0.957	0.911	0.863	0.872	0.917	0.861		1.124	1.47
257.772	206.218	218.716	151.539	167.162	201.531	146.852	209.343	199.969	131.23	149.977	146.852	203.094	239.025	162.475		60.351	55.351	57.422	45.781	47.548	51.816	48.281	54.316	52.548	42.245	44.745	47.119	52.548	57.548	48.281		0.889	0.846	0.834	0.909	0.929	0.943	0.792	0.892	0.91	0.924	0.941	0.831	0.924	0.848	0.876		1.381	1.568
181.222	234.339	198.407	118.732	282.769	153.101	159.35	210.905	254.648	115.607	204.656	187.471	234.339	164.037	340.572		50.048	56.083	52.851	41.21	62.85	44.013	47.548	52.851	59.315	40.781	52.851	52.548	56.083	58.886	72.724		0.909	0.936	0.893	0.879	0.9	0.993	0.886	0.949	0.91	0.874	0.921	0.853	0.936	0.866	0.809		1.477	1.21
139.041	171.848	184.346	128.105	229.652	423.372	135.916	239.025	190.595	135.916	648.337	626.465	168.724	174.973	171.848		47.977	50.048	55.351	43.281	54.316	77.42	45.049	56.815	52.119	44.013	102.167	99.364	47.548	47.245	49.316		0.759	0.862	0.756	0.859	0.978	0.888	0.842	0.931	0.882	0.882	0.781	0.797	0.938	0.924	0.888		2.267	1.645
223.403	290.58	259.335	224.965	192.158	640.526	132.792	185.909	223.403	143.728	459.304	265.584	285.893	171.848	309.327		57.422	64.189	60.351	56.083	50.048	123.379	43.281	50.477	57.851	43.584	89.491	59.315	63.583	47.548	68.153		0.851	0.886	0.895	0.899	0.964	0.529	0.891	0.917	0.839	0.951	0.721	0.949	0.889	0.973	0.837		1.646	1.437
214.029	290.58	217.154	273.395	229.652	215.592	178.097	174.973	512.421	137.479	320.263	89.049	254.648	217.154	223.403		54.316	64.189	53.583	65.35	56.083	55.048	49.316	48.584	149.287	43.281	65.654	35.049	60.351	47.548	55.048		0.912	0.886	0.95	0.804	0.918	0.894	0.92	0.932	0.289	0.922	0.934	0.911	0.879	0.955	0.926		1.321	1.486
196.844	218.716	137.479	135.916	203.094	226.527	520.232	262.459	209.343	123.418	371.817	271.833	232.776	20.309	454.617		54.619	55.048	45.049	58.761	51.084	56.387	88.758	58.583	53.28	40.478	75.349	61.689	57.851	53.583	84.188		0.829	0.907	0.851	0.495	0.978	0.895	0.83	0.961	0.927	0.947	0.823	0.898	0.874	0.95	0.806		1.797	1.489
181.222	257.773	210.905	120.294	235.901	151.539	218.716	218.716	268.708	160.913	185.909	257.773	165.599	103.109	164.037		49.745	61.689	55.654	41.817	56.387	45.781	56.815	54.619	59.618	46.084	51.084	61.386	50.048	27.247	48.584		0.92	0.851	0.856	0.864	0.932	0.909	0.851	0.921	0.95	0.952	0.895	0.86	0.831	0.344	0.873		1.356	1.628
193.72	293.704	201.531	143.728	220.278	189.033	142.165	123.418	165.599	131.23	240.588	217.154	224.965	528.043	271.833		49.013	64.921	52.851	45.049	56.083	49.316	47.548	41.942	47.977	42.549	56.083	55.654	55.048	40.781	61.083		1	0.876	0.907	0.89	0.88	0.977	0.79	0.882	0.904	0.911	0.961	0.881	0.933	0.779	0.916		1.196	1.416
248.399	260.897	160.913	223.403	206.218	364.006	357.757	207.78	413.998	174.973	174.973	185.909	179.66	59.366	299.954		58.886	62.118	45.781	56.815	53.583	69.921	70.224	54.316	77.42	49.013	48.281	52.119	50.351	90.223	65.654		0.9	0.85	0.965	0.87	0.903	0.936	0.912	0.885	0.868	0.915	0.943	0.86	0.891	0.815	0.874		1.325	1.587
318.7	282.769	148.414	146.852	173.411	246.837	149.977	206.218	189.033	171.848	129.667	249.961	232.776	415.561	21.872		64.618	63.583	45.049	45.049	47.548	57.851	49.013	52.851	51.084	48.281	43.281	57.119	56.387	29.746	18.105		0.959	0.879	0.919	0.909	0.964	0.927	0.785	0.928	0.91	0.926	0.87	0.963	0.92	0.843	0.838		1.279	1.497
185.908	179.66	214.029	145.29	287.455	245.274	124.981	174.973	192.158	123.418	343.697	624.903	170.286	74.988	274.957		51.816	49.316	59.922	45.049	62.118	57.851	39.746	48.281	50.78	39.013	68.457	95.829	49.013	81.991	64.921		0.87	0.928	0.749	0.9	0.936	0.921	0.994	0.943	0.936	1	0.922	0.855	0.891	0.777	0.82		1.656	1.133
160.912	187.471	545.228	135.916	260.897	195.282	109.358	224.965	149.977	139.041	273.395	20.309	76.551	179.66	43.743		49.316	51.816	95.829	41.513	60.351	50.78	40.781	54.316	48.281	41.513	65.957	21.944	32.675	31.943	26.64		0.831	0.877	0.746	0.991	0.9	0.952	0.826	0.958	0.809	1	0.79	0.53	0.901	0.924	0.775		1.553	1.386
203.093	182.784	331.199	168.724	195.282	34.37	117.169	239.025	260.897	123.418	212.467	354.633	226.527	76.551	362.444		55.048	50.351	71.689	49.013	51.816	82.46	39.013	55.351	59.315	40.781	52.548	73.76	55.048	52.119	70.653		0.842	0.906	0.81	0.883	0.914	0.064	0.967	0.98	0.932	0.933	0.967	0.819	0.939	0.831	0.912		1.72	1.534
173.41	184.346	181.222	109.358	234.339	182.784	162.475	240.588	185.909	146.852	149.977	251.524	199.969	151.539	162.475		50.351	50.048	51.084	40.478	56.387	51.387	49.316	56.815	50.351	46.084	46.513	60.654	51.816	30.479	47.548		0.86	0.925	0.873	0.839	0.926	0.87	0.839	0.937	0.921	0.869	0.871	0.859	0.936	1	0.903		1.357	1.471
199.969	151.539	295.267	128.105	307.765	214.029	146.852	207.78	171.848	168.724	276.52	315.576	132.792	62.49	171.848		52.851	44.013	64.921	41.817	67.547	55.048	44.013	54.619	47.245	47.245	68.886	66.386	41.513	46.513	47.977		0.9	0.983	0.88	0.921	0.848	0.888	0.953	0.875	0.967	0.95	0.732	0.9	0.968	0.88	0.938		1.443	1.391
181.222	192.158	193.72	95.298	232.776	385.878	142.165	124.981	195.282	146.852	276.52	189.033	198.407	868.615	123.418		49.013	51.084	50.78	37.246	56.083	78.153	44.013	40.478	52.548	45.049	62.118	50.048	51.816	27.979	43.281		0.948	0.925	0.944	0.863	0.93	0.794	0.922	0.959	0.889	0.909	0.901	0.948	0.929	1	0.828		1.334	1.227
193.72	398.376	193.72	273.395	203.094	278.082	115.607	181.222	304.64	198.407	115.607	245.274	398.376	209.343	417.123		53.887	96.132	53.583	64.921	52.548	78.027	43.281	48.584	67.724	52.851	41.513	59.618	73.153	113.202	81.259		0.838	0.542	0.848	0.815	0.924	0.574	0.776	0.965	0.835	0.893	0.843	0.867	0.935	0.852	0.794		1.611	1.842
224.965	171.848	284.331	131.23	270.271	154.664	151.539	190.595	184.346	132.792	270.271	423.372	282.769	106.234	243.712		56.815	47.548	62.85	45.352	60.351	47.852	47.548	53.28	56.083	42.245	67.118	77.724	61.815	56.993	59.618		0.876	0.955	0.905	0.802	0.932	0.849	0.842	0.844	0.737	0.935	0.754	0.881	0.93	0.81	0.862		1.464	1.137
148.414	217.154	243.712	124.981	262.459	249.961	134.354	243.712	251.524	162.475	123.418	389.002	204.656	293.704	157.788		46.816	56.387	58.583	45.049	58.886	57.851	43.281	58.583	65.957	46.513	42.549	77.724	52.851	38.281	49.013		0.851	0.858	0.892	0.774	0.951	0.939	0.901	0.892	0.727	0.944	0.857	0.809	0.921	0.911	0.825		1.81	1.657
228.089	203.094	232.776	145.29	271.833	189.033	224.965	206.218	165.599	342.134	409.312	195.282	68.739	193.72	465.553		60.047	73.331	56.083	45.781	59.315	50.351	54.619	53.887	50.048	71.689	79.491	54.619	30.479	67.724	79.491		0.795	0.475	0.93	0.871	0.971	0.937	0.948	0.892	0.831	0.837	0.814	0.823	0.93	0.805	0.926		1.803	1.386
218.716	593.658	159.35	115.607	243.712	195.282	139.041	167.162	184.346	135.916	123.418	196.844	253.086	143.728	146.852		56.815	101.435	46.513	39.746	58.886	52.548	46.816	52.548	49.316	41.513	41.084	53.887	68.153	53.887	45.781		0.851	0.725	0.926	0.92	0.883	0.889	0.797	0.761	0.953	0.991	0.919	0.852	0.685	0.838	0.88		1.556	1.378
129.667	178.097	649.899	217.154	189.033	223.403	139.041	607.718	182.784	149.977	259.335	293.704	20.309	85.924	164.037		42.549	47.548	137.217	54.316	51.084	54.012	46.513	91.561	52.851	46.084	59.618	68.457	14.873	45.049	46.513		0.9	0.99	0.434	0.925	0.91	0.962	0.808	0.911	0.822	0.887	0.917	0.788	1	0.89	0.953		1.562	1.24
160.912	232.776	318.701	129.667	251.524	228.09	120.294	154.664	187.471	148.414	112.483	303.078	112.483	204.656	185.909		46.816	56.815	71.992	42.978	58.583	56.083	43.71	46.513	49.316	44.013	38.71	65.654	38.71	34.014	49.316		0.923	0.906	0.773	0.882	0.921	0.911	0.791	0.898	0.969	0.963	0.943	0.884	0.943	0.933	0.961		1.311	1.312
134.354	232.776	254.648	128.105	426.496	189.033	123.418	260.897	328.074	257.773	442.119	438.994	167.162	296.829	23.434		44.013	58.154	62.118	45.049	104.97	53.28	41.817	59.315	71.689	64.618	91.561	83.759	51.513	53.583	16.641		0.872	0.865	0.829	0.793	0.486	0.837	0.887	0.932	0.802	0.776	0.663	0.786	0.792	0.896	1		1.869	1.454
195.282	174.973	162.475	357.757	178.097	265.584	170.286	214.029	321.825	259.335	118.732	226.527	40.619	135.916	192.158		54.316	48.584	50.048	79.062	48.281	61.386	49.619	55.351	68.886	61.083	41.513	55.78	27.676	63.886	50.048		0.832	0.932	0.815	0.719	0.96	0.886	0.869	0.878	0.852	0.873	0.866	0.915	0.666	0.914	0.964		1.305	1.539
195.282	246.837	328.074	201.531	185.909	217.154	165.599	170.286	182.784	148.414	185.909	212.467	148.414	79.675	368.693		54.316	59.618	69.921	53.28	51.084	54.316	48.584	49.745	50.78	44.745	49.745	55.654	46.816	41.513	73.76		0.832	0.873	0.843	0.892	0.895	0.925	0.882	0.865	0.891	0.932	0.944	0.862	0.851	0.991	0.852		1.578	1.513
145.29	220.278	221.841	146.852	195.282	214.029	115.607	292.142	203.094	148.414	306.203	174.973	290.58	234.339	245.274		45.352	56.083	56.083	45.049	54.316	55.351	40.781	63.154	55.351	44.745	66.689	51.084	65.35	31.211	58.583		0.888	0.88	0.886	0.909	0.832	0.878	0.874	0.92	0.833	0.932	0.865	0.843	0.855	1	0.898		1.603	1.598
154.663	168.724	348.383	218.716	362.444	162.475	153.101	199.969	165.599	156.226	293.704	354.633	289.018	368.693	351.508		46.816	47.852	72.724	54.316	69.618	46.513	46.513	52.548	46.816	46.816	65.957	71.689	64.921	57.119	68.886		0.887	0.926	0.828	0.932	0.94	0.944	0.889	0.91	0.949	0.896	0.848	0.867	0.862	0.903	0.931		1.54	1.212
176.535	248.399	292.142	149.977	209.343	237.463	157.788	234.339	185.909	128.105	173.411	214.029	176.535	209.343	18.747		49.316	60.654	67.118	46.21	53.583	59.922	48.584	57.548	51.816	42.245	48.281	55.654	47.548	69.921	14.873		0.912	0.848	0.815	0.883	0.916	0.831	0.84	0.889	0.87	0.902	0.935	0.868	0.981	0.948	1		1.438	1.63
142.165	228.09	285.893	212.467	501.485	278.082	139.041	210.905	168.724	206.218	120.294	259.335	331.199	287.455	270.271		43.281	57.119	64.618	54.316	90.097	61.815	46.084	53.28	50.174	51.816	39.013	59.922	71.689	52.548	63.886		0.954	0.879	0.86	0.905	0.776	0.915	0.823	0.934	0.842	0.965	0.993	0.908	0.81	0.953	0.832		1.156	1.205
265.584	157.788	282.769	49.992	190.595	242.15	149.977	392.127	237.463	168.724	192.158	284.331	248.399	185.909	10.936		62.118	48.281	64.618	25.176	52.548	57.119	48.584	73.456	57.851	47.852	51.084	63.154	57.851	66.386	11.338		0.865	0.851	0.851	0.991	0.867	0.933	0.798	0.913	0.892	0.926	0.925	0.896	0.933	0.82	1		1.669	1.733
159.35	199.969	159.35	128.105	201.531	270.271	264.022	229.652	124.981	131.23	276.52	184.346	160.913	264.022	18.747		48.887	56.815	47.548	42.549	53.583	61.083	61.815	56.083	42.549	44.013	63.886	51.513	46.513	52.245	14.873		0.838	0.778	0.886	0.889	0.882	0.91	0.868	0.918	0.868	0.851	0.851	0.873	0.935	0.856	1		1.657	1.982
132.792	270.271	267.146	185.909	196.844	181.222	154.664	221.841	264.022	126.543	232.776	260.897	228.09	104.671	542.103		42.549	66.26	59.922	50.78	53.583	50.048	46.816	53.583	59.922	40.478	56.083	61.083	56.083	71.385	90.526		0.922	0.774	0.935	0.906	0.862	0.909	0.887	0.971	0.924	0.971	0.93	0.879	0.911	0.651	0.831		1.718	1.24
118.731	212.467	257.773	126.543	253.086	221.841	123.418	167.162	438.994	153.101	121.856	240.588	246.837	356.195	146.852		42.245	55.351	60.351	42.245	58.583	57.548	43.281	51.816	79.188	45.049	42.245	57.851	56.815	37.246	45.781		0.836	0.871	0.889	0.891	0.927	0.842	0.828	0.782	0.88	0.948	0.858	0.903	0.961	0.948	0.88		1.654	1.304
237.463	210.905	184.346	214.029	473.364	254.648	139.041	284.331	273.395	142.165	234.339	284.331	193.72	106.234	167.162		57.851	55.351	52.119	56.083	109.667	61.386	44.316	61.815	61.386	42.549	57.119	63.886	52.119	68.886	48.584		0.892	0.865	0.853	0.855	0.495	0.849	0.89	0.935	0.912	0.987	0.903	0.875	0.896	0.943	0.89		1.605	1.626
187.471	206.218	312.452	120.294	176.535	434.308	145.29	237.463	279.644	223.403	129.667	421.81	174.973	210.905	349.946		54.619	52.548	93.203	45.049	48.584	115.273	45.049	58.886	62.85	56.815	40.781	80.527	54.619	37.246	82.294		0.79	0.938	0.452	0.745	0.94	0.411	0.9	0.861	0.89	0.87	0.98	0.817	0.737	0.962	0.649		1.886	1.485
162.475	181.222	254.648	128.105	215.592	320.263	162.475	359.319	273.395	165.599	253.086	304.64	193.72	195.282	389.002		51.387	50.048	57.851	42.549	56.815	78.153	48.584	72.724	61.815	48.281	58.583	66.386	54.619	53.583	79.188		0.773	0.909	0.956	0.889	0.839	0.659	0.865	0.854	0.899	0.893	0.927	0.869	0.816	0.923	0.78		2.02	1.211
198.406	226.527	237.463	143.728	174.973	199.969	182.784	210.905	198.407	134.354	174.973	256.21	87.486	174.973	154.664		52.245	54.619	58.886	46.816	48.584	52.119	50.048	53.583	52.548	41.817	49.316	59.922	34.014	51.084	46.816		0.913	0.954	0.861	0.824	0.932	0.925	0.917	0.923	0.903	0.966	0.904	0.897	0.95	0.94	0.887		1.508	1.109
145.29	204.656	604.594	129.667	207.78	251.524	193.72	203.094	174.973	145.29	132.792	392.127	257.773	209.343	135.916		46.513	54.619	95.4	42.549	53.887	60.654	52.548	51.816	49.013	43.281	41.513	80.956	61.386	48.281	45.781		0.844	0.862	0.835	0.9	0.899	0.859	0.882	0.951	0.915	0.975	0.968	0.752	0.86	0.943	0.815		1.514	1.441
145.29	484.3	151.539	121.856	218.716	239.025	223.403	332.761	248.399	142.165	134.354	267.146	262.459	78.113	168.724		46.21	107.899	48.584	42.245	54.316	57.851	55.351	66.386	60.957	44.013	43.281	60.957	64.921	55.048	51.387		0.855	0.523	0.807	0.858	0.932	0.897	0.916	0.949	0.84	0.922	0.901	0.903	0.783	0.868	0.803		1.893	2.817
128.105	379.629	249.961	178.097	212.467	240.588	249.961	248.399	245.274	187.471	193.72	279.644	181.222	271.833	26.558		48.28	79.188	70.956	51.513	55.351	58.886	61.689	58.886	58.886	51.084	54.012	68.76	49.316	31.943	19.873		0.691	0.761	0.624	0.843	0.871	0.872	0.825	0.9	0.889	0.903	0.834	0.743	0.936	0.962	0.845		2.406	1.538
198.406	206.218	107.796	124.981	220.278	578.035	162.475	160.913	420.247	156.226	309.327	206.218	367.131	232.776	218.716		56.083	54.316	41.21	42.245	53.583	93.758	49.316	51.084	76.688	44.745	67.724	57.851	73.76	60.351	56.387		0.793	0.878	0.798	0.88	0.964	0.826	0.839	0.775	0.898	0.981	0.847	0.774	0.848	0.938	0.864		1.787	1.622
135.916	187.471	156.226	143.728	454.617	251.524	198.407	206.218	451.493	245.274	221.841	264.022	157.788	232.776	28.121		45.049	51.816	46.513	45.781	78.456	57.851	57.851	57.548	80.223	59.618	56.083	61.689	46.513	55.654	19.141		0.842	0.877	0.907	0.862	0.928	0.944	0.745	0.782	0.882	0.867	0.886	0.872	0.917	0.944	0.965		1.831	1.325
193.72	174.973	223.403	126.543	245.274	218.716	176.535	218.716	217.154	189.033	203.094	210.905	554.602	173.411	190.595		50.351	47.548	56.387	40.781	58.886	55.351	48.281	54.744	53.28	50.048	52.548	53.583	88.758	57.851	51.816		0.96	0.973	0.883	0.956	0.889	0.897	0.952	0.917	0.961	0.948	0.924	0.923	0.885	0.874	0.892		1.464	1.182
207.78	146.852	270.271	120.294	217.154	253.086	182.784	349.946	143.728	145.29	246.837	259.335	187.471	173.411	927.981		57.119	44.745	65.957	42.852	59.012	61.386	51.513	72.421	44.013	44.316	59.012	62.725	50.78	50.351	117.773		0.8	0.922	0.781	0.823	0.784	0.844	0.866	0.838	0.932	0.93	0.891	0.828	0.914	0.86	0.841		1.697	1.439
115.607	382.753	515.545	107.796	299.954	299.954	115.607	481.175	154.664	199.969	239.025	140.603	365.568	159.35	193.72		41.513	73.456	88.455	40.049	65.957	67.724	39.746	82.294	44.745	51.816	59.922	48.584	74.617	47.245	50.351		0.843	0.891	0.828	0.845	0.866	0.822	0.92	0.893	0.971	0.936	0.837	0.749	0.825	0.976	0.96		1.902	1.36
248.399	343.697	176.535	131.23	259.335	179.66	118.732	221.841	173.411	128.105	178.097	206.218	206.218	176.535	162.475		58.583	67.85	49.013	42.245	58.886	48.281	39.442	54.316	48.584	41.513	48.584	52.548	53.28	50.351	47.245		0.91	0.938	0.923	0.924	0.94	0.969	0.959	0.945	0.923	0.934	0.948	0.938	0.913	0.79	0.915		1.409	1.099
276.519	462.428	337.448	126.543	215.592	248.399	312.452	171.848	220.278	167.162	198.407	465.553	93.735	364.006	259.335		64.618	87.294	79.795	41.513	53.583	59.618	68.76	51.084	57.851	46.513	51.816	83.027	35.478	48.281	62.422		0.832	0.763	0.666	0.923	0.944	0.878	0.83	0.828	0.827	0.971	0.929	0.849	0.936	0.952	0.836		1.619	1.732
140.603	192.158	248.399	154.664	240.588	221.841	457.742	399.938	210.905	134.354	262.459	253.086	134.354	173.411	226.527		46.21	51.513	57.851	49.013	56.387	55.048	81.259	76.992	57.851	43.281	60.654	61.386	42.978	72.421	60.654		0.827	0.91	0.933	0.809	0.951	0.92	0.871	0.848	0.792	0.901	0.897	0.844	0.914	0.872	0.774		1.904	1.45
265.584	198.407	226.527	139.041	117.169	168.724	223.403	220.278	471.802	187.471	204.656	232.776	221.841	321.825	293.704		60.351	51.816	57.119	45.781	40.049	47.977	58.886	56.083	80.527	49.316	52.119	59.922	56.387	47.245	73.76		0.916	0.929	0.873	0.834	0.918	0.921	0.81	0.88	0.914	0.969	0.947	0.815	0.877	0.976	0.678		1.504	1.296
148.414	184.346	182.784	110.92	382.753	303.078	167.162	204.656	210.905	154.664	423.372	181.222	170.286	234.339	243.712		47.245	49.619	52.548	42.245	107.899	64.921	48.887	55.048	54.619	46.084	76.992	51.387	52.548	67.421	63.76		0.836	0.941	0.832	0.781	0.413	0.904	0.879	0.849	0.888	0.915	0.898	0.862	0.775	0.89	0.753		1.799	1.307
201.531	199.969	157.788	98.422	196.844	298.391	206.218	281.206	192.158	329.636	203.094	160.913	156.226	146.852	423.372		52.851	52.851	49.013	37.246	51.816	65.654	55.351	63.886	52.851	93.329	61.815	47.852	45.477	60.225	85.223		0.907	0.9	0.825	0.892	0.921	0.87	0.846	0.866	0.864	0.476	0.668	0.883	0.949	0.812	0.733		1.628	1.355
160.912	190.595	254.648	126.543	339.01	214.029	168.724	185.909	21.872	131.23	240.588	206.218	157.788	101.547	267.146		47.852	55.477	59.618	44.745	71.385	53.583	46.816	51.513	22.373	40.781	56.815	52.851	45.781	43.281	64.189		0.883	0.778	0.9	0.794	0.836	0.937	0.967	0.88	0.549	0.992	0.937	0.928	0.946	0.985	0.815		1.616	2.253
156.226	557.726	346.821	129.667	221.841	374.942	181.222	371.817	171.848	132.792	253.086	60.928	195.282	181.222	367.131		45.781	90.829	72.421	44.013	55.048	87.294	50.048	84.491	48.584	43.281	58.886	32.675	51.816	39.013	76.259		0.937	0.85	0.831	0.841	0.92	0.618	0.909	0.655	0.915	0.891	0.917	0.717	0.914	0.838	0.793		1.53	1.489
193.72	268.708	184.346	453.055	209.343	592.096	154.664	239.025	304.64	126.543	128.105	245.274	93.735	365.568	345.259		51.816	62.547	54.619	80.956	52.548	94.793	47.548	56.512	69.492	41.513	41.513	58.583	36.21	52.851	70.224		0.907	0.863	0.777	0.869	0.953	0.828	0.86	0.941	0.793	0.923	0.934	0.898	0.898	0.815	0.88		1.511	1.104
165.599	289.018	215.592	185.909	245.274	296.829	121.856	799.876	259.335	185.909	143.728	178.097	104.671	90.611	39.056		48.28	61.083	54.316	53.583	57.119	67.421	40.781	126.004	60.654	50.351	43.281	50.048	38.71	70.956	21.64		0.893	0.973	0.918	0.814	0.945	0.821	0.921	0.633	0.886	0.921	0.964	0.893	0.878	0.912	1		1.396	1.188
231.214	282.769	234.339	157.788	318.701	374.942	240.588	135.916	418.685	153.101	182.784	442.119	176.535	71.864	159.35		58.28	64.189	55.78	46.513	66.082	77.724	58.583	44.745	79.491	44.745	50.048	188.803	49.745	35.478	49.923		0.855	0.862	0.946	0.917	0.917	0.78	0.881	0.853	0.833	0.961	0.917	0.156	0.896	0.905	0.803		1.831	1.389
321.825	432.745	303.078	299.954	212.467	217.154	114.045	292.142	248.399	126.543	154.664	187.471	257.773	262.459	451.493		67.421	91.865	64.618	69.189	54.619	54.316	39.013	62.85	61.083	40.781	45.781	51.816	59.618	31.211	82.723		0.89	0.644	0.912	0.787	0.895	0.925	0.942	0.929	0.837	0.956	0.927	0.877	0.911	0.927	0.829		1.335	1.688
151.539	287.455	520.232	367.131	164.037	203.094	135.916	145.29	196.844	146.852	151.539	262.459	110.92	173.411	149.977		45.781	63.457	91.99	71.385	51.816	52.119	44.745	45.781	52.548	44.013	47.548	66.689	38.281	66.386	46.387		0.909	0.897	0.773	0.905	0.768	0.94	0.853	0.871	0.896	0.953	0.842	0.742	0.951	0.748	0.876		1.098	1.382
218.716	267.146	371.817	187.471	224.965	284.331	192.158	171.848	243.712	206.218	135.916	193.72	293.704	240.588	167.162		56.815	64.189	69.921	51.513	56.083	63.886	53.28	48.281	58.886	53.583	45.049	51.816	65.654	49.316	48.281		0.851	0.815	0.956	0.888	0.899	0.875	0.851	0.926	0.883	0.903	0.842	0.907	0.856	0.896	0.901		1.585	1.306
149.977	254.648	431.183	123.418	168.724	467.115	143.728	459.304	159.35	154.664	118.732	203.094	96.86	151.539	173.411		45.049	57.851	80.527	44.745	52.119	86.133	44.316	102.293	45.781	47.548	41.21	52.851	35.478	57.119	50.048		0.929	0.956	0.836	0.775	0.781	0.791	0.92	0.552	0.955	0.86	0.879	0.914	0.967	0.927	0.87		1.457	1.11
248.399	373.38	599.907	106.234	204.656	515.545	164.037	421.81	485.862	159.35	173.411	148.414	242.15	273.395	224.965		58.154	74.188	116.737	36.21	53.28	87.294	47.548	78.759	95.526	47.548	47.548	48.584	57.851	45.781	58.886		0.923	0.852	0.553	1	0.906	0.85	0.912	0.855	0.669	0.886	0.964	0.79	0.909	0.909	0.815		1.492	1.285
265.584	218.716	210.905	159.35	209.343	267.146	185.909	262.459	262.459	179.66	129.667	467.115	85.924	203.094	171.848		63.154	58.583	55.654	48.281	52.548	62.422	51.084	59.922	71.992	48.281	43.281	83.027	36.21	63.154	49.619		0.837	0.801	0.856	0.859	0.953	0.862	0.895	0.919	0.636	0.969	0.87	0.852	0.823	0.861	0.877		1.813	1.879
199.969	237.463	370.255	210.905	153.101	320.263	212.467	331.199	271.833	176.535	198.407	271.833	242.15	173.411	40.619		55.048	56.815	74.492	54.619	46.513	73.456	56.083	88.329	60.351	50.655	58.886	68.028	58.886	52.548	24.444		0.829	0.924	0.838	0.888	0.889	0.746	0.849	0.533	0.938	0.865	0.719	0.738	0.878	0.924	0.854		1.728	1.17
193.72	260.897	317.138	170.286	228.09	321.825	190.595	237.463	210.905	221.841	445.243	214.029	117.169	115.607	164.037		53.583	61.386	88.329	47.548	56.387	68.153	51.387	75.653	52.851	54.316	83.455	55.048	38.71	50.048	47.245		0.848	0.87	0.511	0.946	0.901	0.871	0.907	0.521	0.949	0.945	0.803	0.888	0.983	0.87	0.924		1.768	1.418
131.229	576.473	320.263	160.913	156.226	184.346	135.916	198.407	245.274	178.097	610.843	374.942	135.916	212.467	210.905		44.745	90.526	96.739	47.852	46.513	50.048	44.013	51.513	58.154	48.281	93.758	74.188	42.549	39.013	60.957		0.824	0.884	0.43	0.883	0.907	0.925	0.882	0.94	0.911	0.96	0.873	0.856	0.943	0.954	0.713		1.686	1.518
167.161	239.025	264.022	143.728	260.897	148.414	156.226	256.21	199.969	132.792	206.218	159.35		201.531	371.817		49.316	57.851	62.118	45.781	58.583	78.634	45.049	57.851	56.387	41.942	51.816	47.245		52.548	79.366		0.864	0.897	0.86	0.862	0.955	0.302	0.967	0.962	0.79	0.949	0.965	0.897		0.967	0.742		1.666	1.53
139.041	201.531	159.35	196.844	189.033	215.592	214.029	235.901	237.463	149.977	173.411	399.938		382.753	226.527		42.978	55.048	45.781	52.119	49.316	71.385	54.744	56.815	56.815	45.049	46.816	85.83		52.119	58.154		0.946	0.836	0.955	0.911	0.977	0.532	0.897	0.918	0.924	0.929	0.994	0.682		0.932	0.842		1.581	1.6
240.587	251.524	809.25	281.206	232.776	223.403	203.094	185.909	201.531	160.913	198.407	164.037		89.049	273.395		56.815	58.886	107.899	61.386	55.048	55.477	52.851	53.155	52.851	47.245	51.816	47.548		74.188	85.704		0.937	0.912	0.873	0.938	0.965	0.912	0.914	0.827	0.907	0.906	0.929	0.912		0.874	0.468		1.411	1.441
170.286	231.214	332.761	224.965	184.346	199.969	157.788	171.848	349.946	199.969	385.878	342.134		184.346	224.965		49.316	55.78	70.224	55.351	49.316	52.851	49.013	48.584	82.723	51.816	74.188	97.471		38.281	60.957		0.88	0.934	0.848	0.923	0.953	0.9	0.825	0.915	0.643	0.936	0.881	0.453		0.764	0.761		1.423	1.448
253.085	279.644	334.323	157.788	184.346	267.146	179.66	267.146	170.286	210.905	149.977	98.422		179.66	168.724		58.583	63.457	70.653	47.548	51.513	96.007	50.048	62.85	47.852	53.28	45.352	44.316		51.084	47.977		0.927	0.873	0.842	0.877	0.873	0.364	0.901	0.85	0.935	0.934	0.916	0.63		0.888	0.921		1.279	1.05
165.599	245.274	328.074	157.788	360.882	226.527	134.354	239.025	167.162	182.784	124.981	190.595		162.475	265.584		48.584	59.315	107.47	48.281	69.618	56.083	49.013	57.548	46.816	50.048	41.513	54.619		49.745	77.901		0.882	0.876	0.357	0.851	0.936	0.905	0.703	0.907	0.958	0.917	0.911	0.803		0.912	0.55		1.518	1.563
196.844	178.097	159.35	221.841	343.697	151.539	215.592	268.708	253.086	178.097	123.418	148.414		178.097	182.784		52.548	48.281	50.351	55.351	69.921	46.816	54.316	59.618	57.548	49.619	41.513	44.316		46.513	52.119		0.896	0.96	0.79	0.91	0.883	0.869	0.918	0.95	0.96	0.909	0.9	0.95		0.944	0.846		1.661	1.339
143.728	246.837	262.459	235.901	293.704	160.913	242.15	195.282	212.467	174.973	193.72	140.603		190.595	217.154		45.049	58.886	63.154	58.154	66.689	46.513	59.315	50.78	58.154	49.013	51.084	50.655		49.316	57.119		0.89	0.895	0.827	0.877	0.83	0.935	0.865	0.952	0.789	0.915	0.933	0.689		0.92	0.836		1.593	1.414
176.535	248.399	248.399	199.969	193.72	240.588	320.263	270.271	199.969	137.479	232.776	203.094		198.407	207.78		50.78	58.583	67.724	50.048	53.28	59.922	66.082	61.512	55.351	42.549	55.351	56.083		51.084	52.851		0.86	0.91	0.681	1	0.858	0.842	0.922	0.898	0.82	0.954	0.955	0.811		0.918	0.935		1.72	1.132
156.226	324.95	281.206	132.792	249.961	290.58	168.724	170.286	576.473	198.407	273.395	270.271		176.535	121.856		47.548	68.76	63.154	44.442	57.119	88.758	48.281	48.281	93.632	51.513	61.386	62.118		51.816	45.655		0.868	0.864	0.886	0.845	0.963	0.464	0.91	0.918	0.826	0.94	0.912	0.88		0.929	0.735		1.754	1.249
239.025	224.965	198.407	117.169	196.844	420.247	140.603	246.837	312.452	156.226	187.471	246.837		178.097	195.282		57.851	63.154	56.69	39.013	51.084	75.653	43.281	57.851	66.386	46.513	51.084	62.118		50.351	52.119		0.897	0.709	0.776	0.967	0.948	0.923	0.943	0.927	0.891	0.907	0.903	0.804		0.875	0.903		1.516	2.188
159.35	274.957	181.222	129.667	259.335	284.331	271.833	210.905	293.704	174.973	198.407	317.138		153.101	256.21		46.816	62.85	50.048	45.781	61.083	63.154	60.351	52.851	63.583	49.316	53.583	67.85		52.851	64.921		0.914	0.875	0.909	0.777	0.873	0.896	0.938	0.949	0.913	0.904	0.868	0.866		0.801	0.764		1.445	1.446
104.671	203.094	246.837	281.206	264.022	273.395	189.033	145.29	256.21	157.788	128.105	442.119		239.025	193.72		36.943	53.583	59.618	63.886	58.583	62.118	51.084	47.852	136.359	45.781	42.245	80.956		44.013	52.851		0.964	0.889	0.873	0.866	0.967	0.89	0.91	0.797	0.173	0.946	0.902	0.848		0.993	0.872		1.169	1.52
196.844	217.154	331.199	148.414	182.784	195.282	207.78	198.407	185.909	165.599	254.648	159.35		199.969	420.247		51.512	56.387	77.42	47.548	50.78	51.084	53.583	53.583	51.387	46.513	59.618	46.513		62.725	91.133		0.932	0.858	0.694	0.825	0.891	0.94	0.909	0.868	0.885	0.962	0.9	0.926		0.763	0.636		1.513	1.649
182.784	228.09	199.969	214.029	234.339	229.652	192.158	193.72	193.72	395.251	160.913	181.222		148.414	214.029		51.816	55.351	51.816	55.351	56.815	55.78	51.816	60.654	50.048	76.259	45.477	52.851		54.619	56.387		0.856	0.936	0.936	0.878	0.912	0.928	0.899	0.662	0.972	0.854	0.978	0.815		0.842	0.846		1.652	1.331
306.202	182.784	193.72	217.154	182.784	292.142	471.802	218.716	189.033	137.479	126.543	149.977		195.282	378.066		67.421	52.245	54.619	55.351	48.584	62.725	84.188	57.422	51.084	43.281	44.013	50.351		51.816	74.188		0.846	0.842	0.816	0.891	0.973	0.933	0.837	0.834	0.91	0.922	0.821	0.743		0.695	0.863		1.503	1.857
176.535	265.584	274.957	164.037	312.452	315.576	309.327	320.263	153.101	164.037	165.599	117.169		353.07	207.78		50.048	60.351	69.189	48.281	65.35	74.063	65.35	66.386	45.049	46.816	48.281	42.852		51.084	54.619		0.886	0.916	0.722	0.884	0.919	0.723	0.91	0.913	0.948	0.941	0.893	0.802		0.94	0.875		1.694	1.355
176.535	212.467	312.452	192.158	207.78	192.158	170.286	159.35	195.282	126.543	181.222	295.267		267.146	62.49		50.78	55.048	70.956	51.084	53.28	51.816	48.281	47.548	52.851	40.478	50.048	69.189		73.456	29.014		0.86	0.881	0.78	0.925	0.92	0.899	0.918	0.886	0.879	0.971	0.909	0.775		0.822	0.933		1.704	1.588
174.973	454.617	251.524	151.539	257.773	581.16	157.788	143.728	148.414	153.101	243.712	362.444		276.52	232.776		50.048	84.062	60.957	50.048	60.351	94.793	48.281	44.745	44.745	44.745	61.386	91.133		66.689	71.26		0.878	0.808	0.851	0.76	0.889	0.813	0.851	0.902	0.932	0.961	0.813	0.548		0.755	0.576		1.606	1.676
151.539	210.905	351.508	168.724	157.788	254.648	174.973	199.969	173.411	126.543	215.592	218.716		353.07	167.162		44.745	56.083	71.689	48.584	47.548	84.365	49.013	51.816	50.048	40.478	56.512	56.387		78.759	152.958		0.951	0.843	0.859	0.898	0.877	0.45	0.915	0.936	0.87	0.971	0.848	0.864		0.56	0.09		1.309	1.638
143.728	209.343	215.592	229.652	293.704	235.901	199.969	179.66	165.599	243.712	284.331	146.852		229.652	165.599		47.245	54.316	67.724	56.083	70.956	57.119	52.548	48.281	48.281	56.387	62.85	43.281		70.956	47.245		0.809	0.892	0.591	0.918	0.733	0.909	0.91	0.969	0.893	0.963	0.905	0.985		0.881	0.932		1.978	1.575
143.728	318.701	323.387	162.475	253.086	273.395	151.539	209.343	184.346	343.697	156.226	185.909		157.788	376.504		45.781	69.921	66.689	47.977	59.618	64.189	45.049	55.048	49.013	76.082	46.816	51.816		57.119	77.295		0.862	0.819	0.914	0.887	0.895	0.834	0.938	0.868	0.964	0.746	0.896	0.87		0.885	0.792		1.605	1.601
193.72	243.712	226.527	212.467	310.889	151.539	190.595	242.15	106.234	156.226	196.844	228.09		268.708	264.022		50.048	57.548	63.279	56.387	66.386	46.513	50.048	57.851	54.619	45.781	52.119	56.387		45.781	60.351		0.972	0.925	0.711	0.84	0.886	0.88	0.956	0.909	0.447	0.937	0.911	0.901		0.946	0.911		1.229	1.277
162.475	232.776	334.323	201.531	221.841	143.728	196.844	226.527	160.913	153.101	153.101	278.082		192.158	171.848		48.28	56.083	67.85	51.084	54.619	44.013	52.119	55.351	47.245	44.013	48.281	63.154		60.654	49.619		0.876	0.93	0.913	0.97	0.934	0.932	0.911	0.929	0.906	0.993	0.825	0.876		0.918	0.877		1.615	1.33
176.535	201.531	537.417	198.407	292.142	282.769	195.282	349.946	168.724	218.716	203.094	278.082		151.539	181.222		50.78	51.816	85.526	52.548	63.154	65.654	51.084	73.456	49.013	53.28	52.548	64.189		51.816	55.351		0.86	0.943	0.923	0.903	0.92	0.824	0.94	0.815	0.883	0.968	0.924	0.848		0.899	0.743		1.645	1.35
128.105	339.01	201.531	218.716	231.214	268.708	232.776	185.909	59.366	145.29	146.852	271.833		178.097	154.664		47.245	70.653	54.316	54.316	57.119	62.85	58.154	54.012	44.62	45.781	45.781	63.154		47.119	47.548		0.721	0.853	0.858	0.932	0.891	0.855	0.865	0.801	0.375	0.871	0.88	0.856		0.858	0.86		2.376	1.091
176.535	224.965	178.097	321.825	289.018	364.006	134.354	173.411	231.214	168.724	134.354	53.117		235.901	329.636		52.548	55.048	52.245	75.956	64.618	83.759	42.549	49.316	55.351	48.281	41.513	33.711		47.548	75.224		0.803	0.933	0.82	0.701	0.87	0.652	0.933	0.896	0.948	0.91	0.98	0.587		0.99	0.732		2.016	1.514
160.912	243.712	251.524	167.162	198.407	184.346	178.097	224.965	181.222	151.539	131.23	21.872		410.874	42.181		47.977	58.583	60.351	51.816	51.816	51.816	48.584	57.851	50.78	45.781	42.549	16.641		56.083	25.908		0.878	0.892	0.868	0.782	0.929	0.863	0.948	0.845	0.883	0.909	0.911	0.993		0.942	0.79		1.637	1.565
129.667	276.52	199.969	248.399	370.255	135.916	132.792	181.222	195.282	148.414	151.539	340.572		114.045	185.909		42.978	60.351	51.084	60.654	69.618	42.245	42.245	49.316	51.084	46.513	45.781	73.027		75.653	50.78		0.882	0.954	0.963	0.848	0.96	0.957	0.935	0.936	0.94	0.862	0.909	0.803		0.902	0.906		1.604	1.147
173.411	331.199	349.946	264.022	278.082	204.656	167.162	192.158	246.837	145.29	749.884	310.889		353.07	460.866		51.084	66.689	70.653	60.654	60.654	51.816	47.548	53.155	59.315	42.978	109.667	65.654		37.978	81.688		0.835	0.936	0.881	0.902	0.95	0.958	0.929	0.855	0.882	0.988	0.784	0.906		0.994	0.868		1.767	1.205
182.784	318.701	398.376	120.294	206.218	117.169	148.414	226.527	245.274	142.165	290.58	265.584		215.592	189.033		51.084	66.689	80.223	44.316	53.583	39.746	44.745	58.154	62.422	44.316	77.849	60.351		70.956	51.816		0.88	0.901	0.778	0.77	0.903	0.932	0.932	0.842	0.791	0.91	0.603	0.916		0.881	0.885		1.2	1.361
224.965	253.086	292.142	218.716	201.531	248.399	160.913	176.535	212.467	176.535	174.973	234.339		110.92	68.739		58.154	60.351	72.295	53.583	51.816	59.315	46.816	50.048	54.619	48.281	49.316	57.851		54.316	30.908		0.836	0.873	0.702	0.957	0.943	0.887	0.923	0.886	0.895	0.952	0.904	0.88		0.918	0.904		1.647	1.613
276.52	223.403	326.512	159.35	239.025	157.788	239.025	179.66	270.271	323.387	139.041	495.236		148.414	253.086		62.422	61.512	68.457	48.281	61.386	47.245	56.083	49.316	63.154	67.118	42.978	101.132		39.442	64.921		0.892	0.742	0.876	0.859	0.797	0.888	0.955	0.928	0.852	0.902	0.946	0.608		0.896	0.755		1.322	2.318
170.286	160.913	196.844	134.354	332.761	232.776	214.029	145.29	265.584	139.041	131.23	235.901		153.101	170.286		49.316	48.281	51.387	43.281	70.224	61.083	54.316	47.977	59.618	42.978	40.478	57.548		46.21	47.852		0.88	0.867	0.937	0.901	0.848	0.784	0.912	0.793	0.939	0.946	1	0.895		0.873	0.935		1.747	1.599
199.969	170.286	306.203	148.414	303.078	240.588	196.844	242.15	306.203	162.475	192.158	39.056		249.961	160.913		54.619	51.816	66.386	46.513	67.85	64.189	53.583	63.583	66.386	46.816	50.048	21.944		45.049	48.281		0.842	0.797	0.873	0.862	0.827	0.734	0.862	0.753	0.873	0.932	0.964	1		0.948	0.867		1.623	1.951
179.66	220.278	274.957	168.724	299.954	129.667	154.664	282.769	342.134	232.776	214.029	443.681		182.784	84.362		53.28	61.083	62.118	52.422	64.618	43.71	46.816	69.189	72.421	58.583	54.316	80.956		57.851	34.443		0.795	0.742	0.895	0.772	0.903	0.853	0.887	0.742	0.82	0.852	0.912	0.851		0.939	0.894		2.034	2.195
164.037	235.901	235.901	179.66	307.765	632.714	162.475	332.761	203.094	157.788	182.784	287.455		215.592	170.286		48.281	59.618	56.083	50.048	63.886	100.096	46.513	74.921	52.548	45.049	49.013	65.654		49.316	48.281		0.884	0.834	0.942	0.901	0.948	0.794	0.944	0.745	0.924	0.977	0.956	0.838		0.944	0.918		1.649	1.526
174.973	181.222	301.516	195.282	249.961	103.109	249.961	176.535	73.426	179.66	174.973	204.656		178.097	115.607		51.513	51.084	63.886	51.513	60.654	36.514	57.119	49.619	32.246	50.351	48.584	55.351		53.583	114.179		0.829	0.873	0.928	0.925	0.854	0.972	0.963	0.901	0.887	0.891	0.932	0.839		0.944	0.111		1.936	1.576
240.588	203.094	254.648	187.471	256.21	206.218	210.905	210.905	281.206	185.909	187.471	203.094		184.346	220.278		59.19	53.887	68.457	51.513	59.618	54.012	55.351	52.548	61.386	49.316	52.119	52.548		55.654	78.634		0.863	0.879	0.683	0.888	0.906	0.888	0.865	0.96	0.938	0.961	0.867	0.924		0.723	0.448		1.393	1.623
229.652	157.788	198.407	159.35	285.893	235.901	271.833	198.407	399.938	148.414	192.158	221.841		254.648	487.424		59.922	47.548	54.316	46.816	62.118	58.886	61.083	52.119	75.956	44.745	49.316	53.887		49.013	112.951		0.804	0.877	0.845	0.914	0.931	0.855	0.916	0.918	0.871	0.932	0.993	0.96		0.964	0.48		1.99	1.411
224.965	174.973	251.524	131.23	376.504	306.203	174.973	273.395	204.656	181.222	120.294	234.339		167.162	421.81		60.654	52.119	60.654	42.978	71.689	63.886	48.281	69.492	63.154	49.316	41.513	57.119		60.351	84.365		0.768	0.809	0.859	0.893	0.921	0.943	0.943	0.711	0.645	0.936	0.877	0.903		0.879	0.745		2.012	1.947
214.029	234.339	167.162	195.282	379.629	440.557	170.286	131.23	496.798	148.414	135.916	146.852		284.331	204.656		53.887	56.083	49.442	50.78	136.41	81.259	50.048	42.549	81.688	43.281	45.477	44.316		53.709	57.119		0.926	0.936	0.859	0.952	0.256	0.838	0.854	0.911	0.936	0.996	0.826	0.94		0.728	0.788		1.523	1.361
228.09	156.226	217.154	124.981	251.524	331.199	204.656	146.852	201.531	182.784	193.72	273.395		115.607	239.025		55.351	46.084	65.654	40.781	60.654	66.386	52.851	44.013	52.548	50.351	51.816	63.154		73.456	59.618		0.936	0.924	0.633	0.944	0.859	0.944	0.921	0.953	0.917	0.906	0.907	0.861		0.662	0.845		1.344	1.662
174.973	179.66	45.305	209.343	193.72	328.074	179.66	221.841	170.286	156.226	331.199	181.222		106.234	465.553		48.281	50.048	24.444	52.851	51.084	73.027	50.477	54.744	49.316	46.513	79.188	49.013		39.746	100.4		0.943	0.901	0.953	0.942	0.933	0.773	0.886	0.93	0.88	0.907	0.664	0.948		0.92	0.58		1.442	1.345
160.913	215.592	182.784	149.977	235.901	154.664	187.471	156.226	224.965	146.852	142.165	182.784		148.414	243.712		51.816	54.619	52.851	45.781	56.815	49.619	50.048	45.049	56.083	44.013	42.978	50.78		39.746	58.583		0.753	0.908	0.822	0.899	0.918	0.789	0.941	0.967	0.899	0.953	0.967	0.891		0.845	0.892		2.119	1.366
151.539	178.097	165.599	154.664	256.21	203.094	154.664	243.712	226.527	207.78	142.165	185.909		148.414	154.664		47.977	49.316	51.513	46.816	58.583	53.583	46.513	57.851	57.119	51.816	44.013	53.28		48.887	46.816		0.827	0.92	0.784	0.887	0.938	0.889	0.898	0.915	0.873	0.973	0.922	0.823		0.78	0.887		1.729	1.436
159.35	215.592	221.841	153.101	296.829	206.218	159.35	196.844	220.278	218.716	114.045	359.319		174.973	249.961		47.548	56.387	57.119	45.477	63.886	55.048	46.513	51.816	54.619	53.887	38.71	74.921		44.745	59.618		0.886	0.852	0.854	0.93	0.914	0.855	0.926	0.921	0.928	0.947	0.956	0.804		0.932	0.884		1.223	1.689
134.354	162.475	264.022	123.418	312.452	445.243	167.162	274.957	345.259	153.101	240.588	162.475		149.977	190.595		46.816	47.852	63.886	43.281	65.654	80.956	46.513	62.422	69.921	44.316	59.618	46.513		49.013	52.548		0.77	0.892	0.813	0.828	0.911	0.854	0.971	0.887	0.887	0.98	0.851	0.944		0.915	0.867		2.044	1.638
201.531	284.331	210.905	204.656	215.592	217.154	212.467	184.346	415.561	179.66	123.418	326.512		281.206	262.459		56.387	62.118	55.048	52.548	54.619	56.083	52.548	51.084	76.259	49.013	42.245	67.85		44.013	60.351		0.797	0.926	0.875	0.931	0.908	0.868	0.967	0.888	0.898	0.94	0.869	0.891		0.973	0.906		1.542	1.391
104.671	226.527	426.496	321.825	171.848	264.022	218.716	515.545	224.965	190.595	221.841	492.111		206.218	96.86		40.049	55.78	78.456	66.689	49.316	59.618	57.119	86.562	57.422	49.316	55.351	89.365		61.386	70.831		0.82	0.915	0.871	0.909	0.888	0.933	0.842	0.865	0.857	0.985	0.91	0.774		0.938	0.243		1.709	1.467
24.996	214.029	234.339	207.78	656.148	268.708	195.282	292.142	60.928	182.784	139.041	449.93		156.226	181.222		17.373	54.316	57.548	53.28	99.061	63.886	51.084	63.154	28.711	49.013	43.71	80.956		51.816	89.668		1	0.912	0.889	0.92	0.84	0.827	0.94	0.92	0.929	0.956	0.915	0.863		0.965	0.283		1.392	1.49
176.535	199.969	239.025	171.848	206.218	270.271	190.595	198.407	192.158	168.724	212.467	354.633		178.097	376.504		50.655	54.316	57.119	50.048	53.155	63.886	51.387	55.78	52.119	47.548	54.012	72.724		45.049	72.724		0.865	0.852	0.921	0.862	0.917	0.832	0.907	0.801	0.889	0.938	0.915	0.843		0.967	0.895		1.182	1.622
148.414	223.403	571.786	242.15	184.346	192.158	271.833	221.841	281.206	203.094	156.226	270.271			326.512		45.781	55.351	89.187	59.618	50.048	52.548	60.351	55.351	63.154	51.816	45.781	61.386		49.316	79.062		0.89	0.916	0.903	0.856	0.925	0.874	0.938	0.91	0.886	0.951	0.937	0.901		0.92	0.656		1.161	1.381
239.025	218.716	245.274	154.664	353.07	231.214	274.957	239.025	260.897	170.286	189.033	221.841			23.434		56.815	55.78	61.083	47.548	73.153	56.083	63.154	56.815	61.083	47.548	52.977	55.048			19.873		0.931	0.883	0.826	0.86	0.829	0.924	0.866	0.931	0.879	0.946	0.846	0.92			0.746		1.357	1.45
176.535	299.954	215.592	192.158	237.463	203.094	257.773	304.64	251.524	176.535	153.101	221.841			173.411		51.816	68.153	58.154	53.887	56.815	53.887	59.618	65.35	59.618	48.281	45.781	56.083			48.584		0.826	0.812	0.801	0.832	0.924	0.879	0.911	0.896	0.889	0.952	0.918	0.886			0.923		1.621	1.562
128.105	174.973	37.494	160.913	192.158	267.146	149.977	179.66	203.094	153.101	132.792	42.181			246.837		42.549	50.78	21.64	46.816	51.084	60.654	45.781	50.78	55.351	46.816	44.013	24.14			59.618		0.889	0.853	1	0.923	0.925	0.913	0.899	0.876	0.833	0.878	0.861	0.91			0.873		1.515	1.551
96.86	446.806	154.664	195.282	176.535	217.154	209.343	224.965	212.467	157.788	204.656	353.07			153.101		35.478	95.829	47.245	52.548	48.584	56.815	56.512	55.351	55.048	45.477	51.816	71.992			54.619		0.967	0.611	0.871	0.889	0.94	0.845	0.824	0.923	0.881	0.959	0.958	0.856			0.645		1.605	2.29
217.154	196.844	151.539	335.885	256.21	229.652	131.23	167.162	212.467	221.841	165.599	354.633			98.422		56.083	51.816	46.21	84.062	58.583	57.119	42.245	46.816	61.26	55.78	48.281	74.795			42.245		0.868	0.921	0.892	0.597	0.938	0.885	0.924	0.958	0.711	0.896	0.893	0.797			0.693		1.088	1.372
243.712	156.226	212.467	174.973	178.097	199.969	206.218	199.969	254.648	204.656	1181.07	273.395			340.572		57.851	49.745	54.619	48.281	48.281	53.583	52.851	51.816	62.85	53.28	154.59	60.654			72.421		0.915	0.793	0.895	0.943	0.96	0.875	0.928	0.936	0.81	0.906	0.621	0.934			0.816		1.344	2.228
181.222	214.029	184.346	190.595	298.391	253.086	142.165	206.218	198.407	228.09	385.878	203.094			210.905		52.548	56.083	50.351	50.048	66.689	60.351	49.013	51.816	55.351	56.387	104.793	54.316			53.28		0.825	0.855	0.914	0.956	0.843	0.873	0.744	0.965	0.814	0.901	0.442	0.865			0.934		1.67	1.712
145.29	217.154	224.965	131.23	218.716	189.033	212.467	198.407	220.278	154.664	271.833	29.683			179.66		46.816	56.083	58.583	42.549	53.887	51.084	55.048	52.548	56.387	45.781	62.118	19.141			51.084		0.833	0.868	0.824	0.911	0.947	0.91	0.881	0.903	0.871	0.927	0.885	1			0.865		1.516	1.7
101.547	234.339	218.716	195.282	173.411	248.399	206.218	239.025	512.421	145.29	340.572	193.72			362.444		39.013	56.083	55.351	53.28	49.013	58.886	53.28	58.886	83.455	44.316	68.153	51.816			80.83		0.838	0.936	0.897	0.864	0.907	0.9	0.913	0.866	0.925	0.93	0.921	0.907			0.697		1.796	1.23
231.214	262.459	518.67	182.784	193.72	153.101	239.025	920.17	196.844	164.037	160.913	451.493			164.037		56.083	60.351	84.491	51.387	52.851	46.513	58.154	131.485	53.155	46.513	45.477	80.223			53.155		0.924	0.906	0.913	0.87	0.872	0.889	0.888	0.669	0.875	0.953	0.978	0.882			0.73		1.22	1.402
189.033	237.463	260.897	159.35	245.274	268.708	173.411	207.78	312.452	278.082	267.146	207.78			26.558		51.816	57.119	60.351	49.316	56.815	60.78	48.584	54.316	68.153	60.351	66.815	55.048			17.373		0.885	0.915	0.9	0.823	0.955	0.914	0.923	0.885	0.845	0.959	0.752	0.862			1		1.38	1.514
126.543	210.905	1023.28	165.599	256.21	214.029	131.23	92.173	168.724	173.411	157.788	179.66			142.165		40.781	53.28	126.611	48.584	59.618	55.048	45.781	37.978	48.281	47.548	45.781	48.281			45.352		0.956	0.934	0.802	0.882	0.906	0.888	0.787	0.803	0.91	0.964	0.946	0.969			0.869		1.37	1.222
178.097	276.52	542.103	198.407	209.343	248.399	148.414	257.773	221.841	178.097	429.621	351.508			501.485		49.013	60.351	98.329	52.548	52.548	58.886	50.351	60.351	55.048	48.281	94.49	70.653			94.971		0.932	0.954	0.705	0.903	0.953	0.9	0.736	0.889	0.92	0.96	0.605	0.885			0.699		1.467	1.311
151.539	315.576	242.15	142.165	187.471	26.558	156.226	164.037	260.897	124.981	182.784	348.383			157.788		47.852	64.921	67.421	43.281	51.513	18.408	48.584	46.816	59.315	39.746	52.245	98.025			49.316		0.832	0.941	0.669	0.954	0.888	0.985	0.832	0.941	0.932	0.994	0.842	0.456			0.815		1.582	1.423
109.358	532.73	168.724	190.595	253.086	229.652	192.158	215.592	229.652	304.64	196.844	235.901			109.358		44.013	212.114	47.852	55.048	61.386	58.583	51.084	55.654	56.815	74.617	50.78	57.119			45.049		0.709	0.149	0.926	0.79	0.844	0.841	0.925	0.875	0.894	0.688	0.959	0.909			0.677		2.406	3.021
148.414	292.142	206.218	106.234	162.475	251.524	157.788	179.66	201.531	126.543	198.407	198.407			364.006		45.781	62.118	59.922	37.675	47.119	57.851	53.583	49.013	51.513	39.746	51.084	52.851			71.385		0.89	0.951	0.722	0.941	0.92	0.944	0.691	0.94	0.954	1	0.955	0.893			0.898		1.648	1.073
284.331	226.527	228.09	103.109	259.335	159.35	164.037	212.467	534.292	189.033	157.788	189.033			345.259		69.921	60.225	56.815	37.246	61.386	48.281	48.281	55.78	86.687	51.084	45.781	50.048			72.421		0.731	0.785	0.888	0.934	0.865	0.859	0.884	0.858	0.893	0.91	0.946	0.948			0.827		1.911	1.606
132.792	206.218	287.455	199.969	164.037	234.339	168.724	303.078	199.969	162.475	143.728	215.592			226.527		42.245	55.351	63.886	53.28	46.816	56.083	49.619	78.759	51.816	47.548	46.513	129.61			58.886		0.935	0.846	0.885	0.885	0.941	0.936	0.861	0.614	0.936	0.903	0.835	0.161			0.821		1.32	1.569
270.271	187.471	234.339	143.728	204.656	232.776	184.346	199.969	773.318	184.346	126.543	254.648			184.346		60.351	50.78	58.886	49.316	52.851	56.815	50.78	52.851	123.076	50.048	40.478	65.225			51.084		0.932	0.914	0.849	0.743	0.921	0.906	0.898	0.9	0.642	0.925	0.971	0.752			0.888		1.215	1.278
173.411	201.531	242.15	226.527	203.094	190.595	226.527	231.214	237.463	170.286	278.082	234.339			118.732		52.119	53.583	58.28	60.957	52.851	52.548	56.815	55.351	56.815	46.513	64.618	78.027			86.566		0.802	0.882	0.896	0.766	0.914	0.867	0.882	0.948	0.924	0.989	0.837	0.484			0.199		1.994	1.495
234.339	226.527	195.282	162.475	182.784	196.844	273.395	259.335	218.716	157.788	242.15	242.15					57.548	58.154	52.548	48.281	49.013	54.316	62.85	62.118	56.387	45.049	59.618	60.351					0.889	0.842	0.889	0.876	0.956	0.838	0.87	0.845	0.864	0.977	0.856	0.835					1.493	1.252
199.969	192.158	242.15	170.286	228.09	198.407	182.784	274.957	182.784	156.226	232.776	240.588					54.316	51.816	66.26	49.316	55.048	52.851	51.513	61.386	50.048	45.781	60.047	57.851					0.852	0.899	0.693	0.88	0.946	0.893	0.866	0.917	0.917	0.937	0.811	0.903					1.59	1.681
235.901	199.969	368.693	140.603	120.294	220.278	220.278	178.097	196.844	187.471	120.294	428.059					55.351	52.119	73.456	44.013	40.781	54.316	53.583	49.316	51.816	51.084	44.013	79.188					0.968	0.925	0.859	0.912	0.909	0.938	0.964	0.92	0.921	0.903	0.78	0.858					1.238	1.527
235.901	473.364	203.094	160.913	165.599	232.776	184.346	246.837	187.471	181.222	156.226	209.343					57.119	79.491	54.619	48.887	47.245	57.119	51.816	57.851	50.048	50.048	46.084	52.548					0.909	0.941	0.856	0.846	0.932	0.897	0.863	0.927	0.941	0.909	0.924	0.953					1.367	1.343
148.414	248.399	179.66	145.29	181.222	265.584	264.022	157.788	259.335	149.977	232.776	370.255					46.084	60.351	50.048	49.316	51.084	63.457	59.618	45.781	59.315	44.316	56.387	74.921					0.878	0.857	0.901	0.751	0.873	0.829	0.933	0.946	0.926	0.96	0.92	0.829					1.433	1.506
281.206	223.403	529.605	562.413	199.969	146.852	224.965	174.973	232.776	162.475	139.041	123.418					65.225	56.815	87.294	94.49	51.816	90.698	54.316	48.281	56.083	47.852	44.745	42.549					0.831	0.87	0.873	0.792	0.936	0.224	0.958	0.943	0.93	0.892	0.873	0.857					1.581	1.692
274.957	254.648	229.652	201.531	543.666	220.278	137.479	284.331	254.648	132.792	146.852	189.033					64.618	57.851	61.083	54.619	118.808	56.083	42.549	69.189	61.083	41.21	44.013	52.548					0.827	0.956	0.773	0.849	0.484	0.88	0.954	0.746	0.858	0.983	0.953	0.86					1.854	1.327
165.599	190.595	479.613	212.467	298.391	214.029	257.773	582.722	299.954	107.796	164.037	337.448					49.745	51.084	116.131	58.583	63.886	53.583	58.583	143.377	67.421	37.978	45.781	76.992					0.841	0.918	0.447	0.778	0.919	0.937	0.944	0.356	0.829	0.939	0.984	0.715					1.806	1.467
189.033	303.078	257.773	176.535	182.784	257.773	234.339	278.082	231.214	206.218	156.226	185.909					52.548	71.992	61.386	48.281	51.816	60.351	57.119	61.815	57.548	52.548	45.781	51.816					0.86	0.735	0.86	0.952	0.856	0.889	0.903	0.915	0.877	0.938	0.937	0.87					1.181	1.391
217.154	203.094	218.716	135.916	224.965	276.52	242.15	149.977	248.399	154.664	120.294	270.271					55.78	54.316	56.083	47.977	55.351	65.225	59.618	46.816	58.583	50.048	41.513	61.386					0.877	0.865	0.874	0.742	0.923	0.817	0.856	0.86	0.91	0.776	0.877	0.901					1.627	1.606
171.848	199.969	312.452	107.796	210.905	264.022	218.716	214.029	259.335	203.094	126.543	651.462					49.013	53.28	65.654	36.943	56.083	63.886	54.316	55.048	61.689	53.583	39.746	183.729					0.899	0.885	0.911	0.993	0.843	0.813	0.932	0.888	0.856	0.889	1	0.243					1.532	1.554
212.467	160.913	262.459	103.109	274.957	370.255	209.343	178.097	312.452	151.539	126.543	195.282					58.154	49.745	64.189	36.943	61.386	80.223	54.316	49.013	71.992	45.049	41.513	53.28					0.789	0.817	0.8	0.949	0.917	0.723	0.892	0.932	0.758	0.938	0.923	0.864					2.186	1.903
198.407	214.029	273.395	174.973	199.969	215.592	253.086	45.305	209.343	199.969	171.848	274.957					51.816	54.316	62.118	49.316	57.119	56.815	58.886	25.479	53.28	52.245	47.548	61.083					0.929	0.912	0.89	0.904	0.77	0.839	0.917	0.877	0.927	0.921	0.955	0.926					1.358	1.46
162.475	254.648	354.633	134.354	199.969	304.64	195.282	189.033	215.592	195.282	120.294	199.969					47.548	59.618	73.456	42.245	53.583	64.921	51.084	51.084	54.619	50.78	42.549	53.583					0.903	0.9	0.826	0.946	0.875	0.908	0.94	0.91	0.908	0.952	0.835	0.875					1.209	1.459
215.592	215.592	606.156	142.165	253.086	224.965	290.58	201.531	256.21	217.154	139.041	229.652					55.351	55.351	92.294	47.548	70.831	56.083	63.583	54.619	61.689	54.744	43.281	60.654					0.884	0.884	0.894	0.79	0.634	0.899	0.903	0.849	0.846	0.911	0.933	0.784					1.689	1.604
210.905	209.343	274.957	159.35	295.267	490.549	209.343	285.893	193.72	142.165	871.74	190.595					56.815	52.548	69.189	48.584	64.618	95.222	53.583	64.189	50.78	44.745	178.855	53.155					0.821	0.953	0.722	0.848	0.889	0.68	0.916	0.872	0.944	0.892	0.342	0.848					1.59	1.155
157.788	212.467	192.158	149.977	212.467	212.467	157.788	293.704	289.018	190.595	154.664	234.339					48.584	54.619	51.816	45.781	58.154	59.618	49.013	64.189	130.358	50.78	46.816	57.851					0.84	0.895	0.899	0.899	0.789	0.751	0.825	0.896	0.214	0.929	0.887	0.88					1.203	1.305
134.354	207.78	201.531	212.467	185.909	259.335	171.848	160.913	301.516	178.097	237.463	176.535					41.513	53.583	52.548	53.583	51.084	60.654	49.013	46.513	66.26	50.048	56.815	50.048					0.98	0.909	0.917	0.93	0.895	0.886	0.899	0.935	0.863	0.893	0.924	0.886					1.116	1.391
267.146	214.029	393.689	164.037	249.961	276.52	134.354	292.142	164.037	164.037	281.206	231.214					61.083	57.422	74.921	47.852	59.315	63.886	43.281	64.921	46.816	48.584	66.689	56.387					0.9	0.816	0.881	0.9	0.893	0.851	0.901	0.871	0.941	0.873	0.795	0.914					1.589	1.892
173.411	201.531	209.343	164.037	281.206	187.471	282.769	432.745	354.633	160.913	178.097						49.013	53.583	53.583	47.245	62.547	51.084	62.85	78.759	70.956	46.084	49.013						0.907	0.882	0.916	0.924	0.903	0.903	0.9	0.877	0.885	0.952	0.932						1.469	1.541
309.327	207.78	187.471	153.101	221.841	267.146	142.165	293.704	215.592	214.029	1079.52						65.654	53.583	52.548	46.21	55.78	62.85	44.013	61.815	56.083	53.583	135.094						0.902	0.909	0.853	0.901	0.896	0.85	0.922	0.966	0.861	0.937	0.743						1.249	1.282
126.543	224.965	142.165	173.411	196.844	204.656	203.094	234.339	287.455	196.844	148.414						43.71	54.316	44.316	52.548	52.119	51.084	53.583	56.815	64.618	51.513	45.049						0.832	0.958	0.91	0.789	0.911	0.986	0.889	0.912	0.865	0.932	0.919						1.822	1.237
171.848	249.961	126.543	106.234	198.407	162.475	149.977	221.841	357.757	168.724	120.294						48.281	59.618	41.513	46.816	51.816	50.78	46.513	54.316	70.653	49.013	41.21						0.926	0.884	0.923	0.609	0.929	0.792	0.871	0.945	0.901	0.883	0.89						1.393	1.436
201.531	198.407	274.957	124.981	253.086	190.595	170.286	301.516	270.271	274.957	104.671						52.119	50.048	66.386	42.245	58.583	50.048	49.745	63.886	62.118	61.386	37.978						0.932	0.995	0.784	0.88	0.927	0.956	0.865	0.928	0.88	0.917	0.912						1.363	1.274
217.154	254.648	253.086	198.407	293.704	387.44	192.158	214.029	649.899	151.539	146.852						55.351	59.618	61.083	58.457	63.154	73.456	53.887	53.583	97.597	45.781	45.781						0.891	0.9	0.852	0.73	0.925	0.902	0.832	0.937	0.857	0.909	0.88						1.417	1.388
185.909	176.535	310.889	74.988	182.784	320.263	167.162	392.127	268.708	182.784	109.358						50.048	49.013	91.865	33.711	53.583	74.188	48.584	103.328	64.618	50.048	39.013						0.933	0.923	0.463	0.829	0.8	0.731	0.89	0.462	0.809	0.917	0.903						1.464	1.422
507.734	254.648	353.07	87.486	142.165	157.788	117.169	201.531	282.769	201.531	185.909						86.259	60.654	70.653	32.978	51.084	49.316	39.442	52.851	62.118	51.816	49.316						0.858	0.87	0.889	1	0.685	0.815	0.946	0.907	0.921	0.943	0.961						1.456	1.562
207.78	179.66	359.319	142.165	207.78	162.475	131.23	195.282	214.029	167.162	182.784						55.048	48.281	73.885	43.281	52.548	47.548	44.013	51.513	55.351	47.548	50.048						0.862	0.969	0.827	0.954	0.946	0.903	0.851	0.925	0.878	0.929	0.917						1.662	1.254
240.588	214.029	257.773	164.037	204.656	701.454	173.411	203.094	523.356	167.162	179.66						57.548	55.351	58.583	45.781	51.084	101.864	48.584	51.816	85.223	47.548	49.316						0.913	0.878	0.944	0.984	0.986	0.85	0.923	0.951	0.906	0.929	0.928						1.474	1.213
151.539	285.893	242.15	103.109	298.391	295.267	173.411	204.656	251.524	206.218	120.294						47.245	64.189	58.583	37.246	63.583	65.35	48.584	52.245	73.027	53.583	40.781						0.853	0.872	0.887	0.934	0.928	0.869	0.923	0.942	0.593	0.903	0.909						1.724	1.279
189.033	310.889	278.082	239.025	237.463	293.704	181.222	185.909	187.471	153.101	131.23						51.387	66.689	61.386	63.457	57.851	63.154	49.316	52.548	51.816	46.513	42.549						0.9	0.878	0.927	0.746	0.892	0.925	0.936	0.846	0.877	0.889	0.911						1.548	1.128
176.535	185.909	198.407	139.041	193.72	259.335	173.411	221.841	235.901	162.475	192.158						50.048	49.013	51.084	45.049	52.548	60.351	53.155	56.387	62.422	47.852	51.816						0.886	0.973	0.955	0.861	0.882	0.895	0.771	0.877	0.761	0.892	0.899						1.624	1.251
165.599	407.749	199.969	256.21	285.893	456.179	178.097	234.339	164.037	142.165	221.841						49.316	77.724	53.28	59.922	62.118	81.991	52.119	56.083	49.013	42.549	56.083						0.856	0.848	0.885	0.897	0.931	0.853	0.824	0.936	0.858	0.987	0.886						1.568	1.726
203.094	207.78	173.411	106.234	203.094	257.773	165.599	217.154	232.776	270.271	132.792						52.548	52.548	65.957	42.978	52.851	67.118	49.316	54.316	56.387	62.118	46.816						0.924	0.946	0.501	0.723	0.914	0.719	0.856	0.925	0.92	0.88	0.761						1.218	1.283
304.64	256.21	179.66	142.165	293.704	554.602	154.664	218.716	229.652	204.656	185.909						65.35	57.851	51.816	42.245	63.154	90.223	47.852	55.048	56.387	53.583	50.048						0.896	0.962	0.841	1	0.925	0.856	0.849	0.907	0.908	0.896	0.933						1.34	1.383
176.535	306.203	476.489	331.199	203.094	378.066	181.222	231.214	264.022	178.097	209.343						50.048	64.618	85.526	68.153	52.851	71.689	50.048	55.654	61.386	50.048	54.619						0.886	0.922	0.819	0.896	0.914	0.924	0.909	0.938	0.88	0.893	0.882						1.536	1.192
209.343	201.531	426.496	170.286	274.957	168.724	135.916	199.969	264.022	170.286	156.226						53.28	51.513	149.59	48.584	62.118	49.013	43.281	52.851	58.583	47.548	47.977						0.927	0.954	0.24	0.907	0.895	0.883	0.912	0.9	0.967	0.946	0.853						1.323	1.511
181.222	229.652	23.434	212.467	199.969	248.399	145.29	226.527	646.775	710.827	101.547						49.013	60.654	18.408	60.351	53.583	57.548	47.852	55.351	103.203	101.864	37.978						0.948	0.784	0.869	0.733	0.875	0.943	0.797	0.929	0.763	0.861	0.885						1.268	1.792
179.66	184.346	164.037	107.796	221.841	259.335	181.222	478.051	318.701	140.603	117.169						51.816	50.351	47.548	37.246	57.548	61.815	50.048	81.259	67.118	44.316	41.513						0.841	0.914	0.912	0.976	0.842	0.853	0.909	0.91	0.889	0.9	0.854						1.627	1.226
237.463	282.769	201.531	182.784	301.516	192.158	157.788	320.263	274.957	143.728	226.527						57.548	62.118	55.78	49.745	70.956	51.816	47.977	81.562	62.422	44.745	53.583						0.901	0.921	0.814	0.928	0.753	0.899	0.861	0.605	0.887	0.902	0.991						1.634	1.337
168.724	160.913	640.526	174.973	285.893	629.59		168.724	206.218	206.218	148.414						48.584	46.816	134.717	47.548	62.85	154.048		49.013	54.619	55.048	45.781						0.898	0.923	0.444	0.973	0.909	0.333		0.883	0.869	0.855	0.89						1.309	1.541
196.844	199.969	323.387	173.411	151.539	204.656		256.21	412.436	193.72	215.592						51.816	50.78	71.385	49.745	46.513	52.851		60.351	75.956	50.78	53.583						0.921	0.974	0.797	0.881	0.88	0.921		0.884	0.898	0.944	0.944						1.439	1.07
195.282	190.595	285.893	179.66	301.516	763.944		192.158	271.833	206.218	663.96						53.583	51.816	63.886	51.816	70.224	116.863		50.351	61.815	52.851	98.632						0.855	0.892	0.88	0.841	0.768	0.703		0.952	0.894	0.928	0.858						1.455	1.591
210.905	190.595	221.841	218.716	167.162	299.954		289.018	212.467	246.837	129.667						60.957	51.084	60.351	54.316	48.281	71.992		63.886	54.619	57.851	42.549						0.713	0.918	0.765	0.932	0.901	0.727		0.89	0.895	0.927	0.9						1.385	1.442
221.841	221.841	351.508	153.101	198.407	189.033		281.206	495.236	178.097	228.09						55.351	55.351	72.421	46.513	52.245	50.477		61.083	82.723	49.316	58.583						0.91	0.91	0.842	0.889	0.913	0.932		0.947	0.909	0.92	0.835						1.222	1.176
142.165	249.961	249.961	193.72	473.364	588.971		553.039	399.938	153.101	281.206						46.816	59.922	61.815	52.548	80.652	98.758		91.99	74.188	45.049	63.154						0.815	0.875	0.822	0.882	0.914	0.759		0.821	0.913	0.948	0.886						1.775	1.402
157.788	284.331	721.763	229.652	403.063	242.15		224.965	182.784	171.848	148.414						45.781	65.35	115.095	58.886	75.653	61.386		57.422	51.084	48.709	45.781						0.946	0.837	0.685	0.832	0.885	0.808		0.857	0.88	0.91	0.89						1.242	1.687
189.033	167.162	223.403	104.671	154.664	201.531		243.712	223.403	184.346	763.944						51.084	49.745	55.351	40.781	48.281	54.316		58.886	58.154	49.316	174.588						0.91	0.849	0.916	0.791	0.834	0.858		0.883	0.83	0.953	0.315						1.29	1.819
174.973	206.218	287.455	170.286	192.158	317.138		207.78	209.343	242.15	253.086						50.351	54.316	62.85	48.584	50.78	65.35		54.316	52.548	56.815	61.083						0.867	0.878	0.914	0.907	0.936	0.933		0.885	0.953	0.943	0.852						1.625	1.513
235.901	178.097	265.584	124.981	540.541	204.656		196.844	340.572	210.905	223.403						58.583	50.048	62.85	41.21	88.455	55.048		53.583	68.153	53.583	57.119						0.864	0.893	0.845	0.925	0.868	0.849		0.862	0.921	0.923	0.86						1.477	1.415
293.704	299.954	173.411	160.913	528.043	279.644		309.327	428.059	209.343	314.014						63.154	64.921	53.583	45.049	86.991	73.76		65.225	77.724	54.316	64.618						0.925	0.894	0.759	0.996	0.877	0.646		0.914	0.89	0.892	0.945						1.102	1.456
254.648	234.339	360.882	182.784	176.535	187.471		326.512	62.49	160.913	284.331						59.618	56.083	87.597	50.048	51.816	50.048		94.365	27.676	47.119	76.385						0.9	0.936	0.591	0.917	0.826	0.941		0.461	1	0.911	0.612						1.235	1.28
190.595	199.969	278.082	267.146	243.712	284.331		285.893	192.158	143.728							51.816	51.816	62.422	61.815	57.851	63.886		64.921	52.851	44.013							0.892	0.936	0.897	0.879	0.915	0.875		0.852	0.864	0.932							1.591	1.215
148.414	257.773	346.821	195.282	245.274	295.267		449.93	304.64	165.599							44.745	61.815	71.689	52.548	56.815	64.618		89.794	65.654	47.548							0.932	0.848	0.848	0.889	0.955	0.889		0.701	0.888	0.92							1.47	1.686
131.23	243.712	209.343	187.471	193.72	235.901		232.776	234.339	234.339							43.281	57.548	52.851	50.048	51.513	56.083		57.119	60.654	56.387							0.88	0.925	0.942	0.941	0.917	0.942		0.897	0.8	0.926							1.685	1.367
140.603	176.535	224.965	196.844	406.187	157.788		174.973	251.524	190.595							43.281	50.78	55.351	51.084	74.188	47.548		50.048	57.851	52.119							0.943	0.86	0.923	0.948	0.927	0.877		0.878	0.944	0.882							1.224	1.793
140.603	242.15	342.134	190.595	206.218	292.142		195.282	210.905	143.728							43.281	59.922	71.992	51.816	52.548	63.886		50.78	54.012	45.049							0.943	0.847	0.83	0.892	0.938	0.899		0.952	0.908	0.89							1.189	1.762
118.732	184.346	321.825	226.527	170.286	171.848		170.286		312.452							42.245	52.119	75.224	56.083	46.816	48.281		47.245		68.457							0.836	0.853	0.715	0.905	0.976	0.926		0.959		0.838							2.029	1.57
151.539	179.66	203.094	139.041	232.776	659.273		243.712		204.656							51.816	53.583	51.816	44.745	58.28	110.273		59.618		52.851							0.709	0.786	0.951	0.873	0.861	0.681		0.862		0.921							2.349	1.917
149.977	228.09	479.613	198.407	176.535	481.175		203.094		184.346							46.942	58.583	82.42	55.351	48.281	100.096		56.083		49.316							0.855	0.835	0.887	0.814	0.952	0.603		0.811		0.953							1.787	1.685
220.278	239.025	268.708	110.92	192.158	28.121		224.965		281.206							54.316	56.083	60.654	42.549	50.048	20.908		55.048		61.083							0.938	0.955	0.918	0.77	0.964	0.808		0.933		0.947							1.292	1.135
156.226	128.105	204.656	253.086	206.218	234.339		224.965		187.471							48.887	43.281	54.316	59.315	54.744	56.815		56.083		49.745							0.821	0.859	0.872	0.904	0.865	0.912		0.899		0.952							1.827	1.64
189.033	229.652	189.033	190.595	174.973			256.21		182.784							52.851	56.815	50.78	51.387	49.745			62.118		50.048							0.85	0.894	0.921	0.907	0.889			0.834		0.917							1.698	1.521
129.667	231.214	301.516	154.664	259.335			265.584		139.041							41.513	56.815	64.618	47.852	60.351			60.654		43.281							0.946	0.9	0.907	0.849	0.895			0.907		0.933							1.397	1.526
179.66	379.629	362.444	178.097	179.66			201.531		129.667							50.351	78.759	76.992	49.745	49.619			54.619		41.513							0.891	0.769	0.768	0.904	0.917			0.849		0.946							1.479	1.621
146.852	240.588	474.926	142.165	220.278			214.029		139.041							44.316	58.886	95.097	43.281	53.583			55.78		42.978							0.94	0.872	0.66	0.954	0.964			0.864		0.946							1.542	1.376
217.154	273.395	407.749	165.599	193.72			176.535		165.599							57.851	59.618	77.724	49.619	52.548			48.281		47.852							0.815	0.967	0.848	0.845	0.882			0.952		0.909							1.659	1.186
151.539	149.977	368.693	137.479	482.738			210.905		151.539							48.281	47.548	79.491	44.316	83.759			55.351		47.119							0.817	0.834	0.733	0.88	0.865			0.865		0.858							1.518	1.69
87.486	176.535	195.282	124.981	179.66			548.353		160.913							35.781	50.78	55.048	40.781	50.048			91.258		45.477							0.859	0.86	0.81	0.944	0.901			0.827		0.978							1.789	1.689
145.29	729.574	393.689	192.158	267.146			190.595		154.664							46.816	135.575	78.759	51.513	62.422			50.048		44.745							0.833	0.499	0.798	0.91	0.862			0.956		0.971							1.572	2.978
140.603	237.463	339.01	203.094	335.885			254.648		159.35							45.781	56.083	72.85	52.851	70.956			59.618		46.816							0.843	0.949	0.803	0.914	0.838			0.9		0.914							1.627	1.104
134.354	254.648	588.971	135.916	209.343			176.535		218.716							44.013	57.548	94.49	44.316	54.619			49.013		55.351							0.872	0.966	0.829	0.87	0.882			0.923		0.897							1.457	1.105
210.905	199.969	35.932	281.206	179.66			139.041		146.852							54.316	54.012	22.373	63.154	49.316			44.316		44.745							0.898	0.861	0.902	0.886	0.928			0.89		0.922							1.494	1.697
107.796	164.037	204.656	129.667	207.78			239.025		132.792							39.013	46.513	53.887	43.584	54.619			57.119		43.584							0.89	0.953	0.886	0.858	0.875			0.921		0.878							1.359	1.318
148.414	270.271	176.535	129.667	324.95			223.403		232.776							45.049	63.154	48.584	42.549	64.618			54.316		55.78							0.919	0.852	0.94	0.9	0.978			0.952		0.94							1.45	1.422
87.486	182.784	160.913	217.154				282.769		159.35							33.711	50.78	46.816	56.083				62.118		45.781							0.967	0.891	0.923	0.868				0.921		0.955							1.521	1.547
	490.549	224.965	129.667				151.539		199.969								81.991	59.618	44.013				45.781		51.816								0.917	0.795	0.841				0.909		0.936								1.272
	249.961	287.455	104.671				173.411		173.411								60.047	66.689	40.049				50.048		47.548								0.871	0.812	0.82				0.87		0.964								1.433
	204.656	153.101	149.977				271.833		34.37								53.28	46.816	44.316				63.583		27.676								0.906	0.878	0.96				0.845		0.564								1.531
	204.656	676.458	124.981				282.769		290.58								56.083	115.273	44.013				62.118		62.118								0.818	0.64	0.811				0.921		0.946								1.772
	204.656	156.226	185.909				224.965		181.222								55.048	46.816	53.155				55.351		50.048								0.849	0.896	0.827				0.923		0.909								1.464
	242.15	231.214	121.856				235.901		129.667								56.815	59.922	42.245				59.618		42.549								0.943	0.809	0.858				0.834		0.9								1.209
	240.588	354.633	206.218				239.025		118.732								58.583	71.992	74.366				59.618		39.442								0.881	0.86	0.469				0.845		0.959								1.331
	206.218	267.146	135.916				196.844		145.29								53.709	63.154	44.013				51.816		45.477								0.898	0.842	0.882				0.921		0.883								1.33
	206.218	48.43	153.101				323.387		285.893								54.316	24.444	45.781				70.956		61.386								0.878	1	0.918				0.807		0.953								1.453
	159.35	234.339	131.23				214.029		463.991								48.281	57.119	43.281				55.048		91.865								0.859	0.903	0.88				0.888		0.691								1.424
	290.58	224.965	218.716				360.882		287.455								86.133	55.351	56.083				70.35		64.315								0.492	0.923	0.874				0.916		0.873								1.531
	203.094	553.039	249.961				246.837		153.101								51.816	110.399	59.618				57.851		45.049								0.951	0.57	0.884				0.927		0.948								1.237
	187.471	157.788	184.346				204.656		159.35								54.316	46.084	52.422				53.583		45.781								0.799	0.934	0.843				0.896		0.955								2.054
	404.625	262.459	193.72				196.844		160.913								75.956	58.583	52.851				52.548		47.852								0.881	0.961	0.872				0.896		0.883								1.376
	240.588	154.664	104.671						176.535								58.886	48.281	40.781						48.281								0.872	0.834	0.791						0.952								1.739
	242.15	189.033	118.732						232.776								56.083	55.654	41.513						55.351								0.967	0.767	0.866						0.955								1.223
	201.531	217.154	167.162						142.165								54.316	57.119	47.548						47.548								0.858	0.836	0.929						0.79								1.699
	364.006	226.527	182.784						137.479								70.35	57.119	54.012						43.281								0.924	0.873	0.787						0.922								1.252
	209.343	189.033	264.022						132.792								56.815	50.78	61.083						41.513								0.815	0.921	0.889						0.968								1.887
	324.95	384.315	117.169						167.162								66.386	74.795	42.245						47.852								0.927	0.863	0.825						0.917								1.281
	201.531	593.658	192.158						212.467								53.583	104.238	51.816						52.851								0.882	0.687	0.899						0.956								1.515
	242.15	271.833	110.92						135.916								57.851	63.154	40.478						41.513								0.909	0.856	0.851						0.991								1.295
	385.878	231.214	201.531						271.833								71.385	57.119	55.351						60.351								0.952	0.891	0.827						0.938								1.119
	260.897	321.825	178.097						196.844								60.351	86.436	50.048						52.851								0.9	0.541	0.893						0.886								1.328
	298.391	331.199	220.278						176.535								68.153	67.118	55.78						48.281								0.807	0.924	0.89						0.952								1.616
	218.716	321.825	374.942						164.037								55.351	69.189	72.421						47.119								0.897	0.845	0.898						0.928								1.447
	382.753	510.858	170.286						132.792								74.188	95.222	51.816						45.781								0.874	0.708	0.797						0.796								1.343
	206.218	315.576	154.664						148.414								53.583	64.921	47.245						46.513								0.903	0.941	0.871						0.862								1.376
	235.901	279.644	164.037						239.025								56.815	60.654	50.351						58.583								0.918	0.955	0.813						0.875								1.345
	207.78	387.44	121.856						189.033								53.583	76.385	43.281						51.084								0.909	0.834	0.817						0.91								1.467
	267.146	159.35	273.395														60.654	46.513	62.118														0.913	0.926	0.89														1.435
	298.391	224.965	153.101														65.957	58.886	47.852														0.862	0.815	0.84														1.623
	326.512	249.961	279.644														67.118	57.851	62.547														0.911	0.939	0.898														1.309
	295.267	164.037	148.414														62.118	47.548	44.013														0.962	0.912	0.963														1.118
	262.459	148.414	160.913														58.583	47.119	47.548														0.961	0.84	0.894														1.288
	171.848	315.576	237.463														48.584	67.421	56.815														0.915	0.872	0.924														1.556
	212.467	982.66	179.66														54.619	188.123	53.155														0.895	0.349	0.799														1.668
	181.222	704.578	224.965														50.78	98.758	57.851														0.883	0.908	0.845														1.667
	170.286	353.07	228.09														49.316	89.062	57.422														0.88	0.559	0.869														1.666
	204.656	246.837	135.916														55.351	57.851	42.549														0.839	0.927	0.943														1.7
	749.884	189.033	118.732														101.561	50.78	40.781														0.914	0.921	0.897														1.217
	218.716	348.383	154.664														53.583	70.528	46.816														0.957	0.88	0.887														1.106
	212.467	195.282	203.094														53.28	51.084	52.548														0.941	0.94	0.924														1.207
	563.975	553.039	221.841														99.239	88.026	54.316														0.72	0.897	0.945														1.514
	274.957	295.267	109.358														63.154	63.886	38.71														0.866	0.909	0.917														1.347
	137.479	373.38	140.603														63.886	74.795	45.352														0.423	0.839	0.859														1.197
	218.716	304.64	118.732														56.083	64.315	42.549														0.874	0.925	0.824														1.461
	354.633	253.086	128.105														68.886	60.654	42.852														0.939	0.864	0.877														1.205
	235.901	337.448	214.029														56.387	70.956	58.457														0.932	0.842	0.787														1.188
	218.716	217.154	151.539														53.583	54.316	46.513														0.957	0.925	0.88														1.275
	696.767	442.119	132.792														97.293	82.723	44.013														0.925	0.812	0.861														1.242
	101.547	315.576	121.856														39.013	67.118	41.513														0.838	0.88	0.889														1.205
	278.082	239.025	214.029														62.422	56.815	53.583														0.897	0.931	0.937														1.163
	173.411	264.022	176.535														49.316	63.154	50.78														0.896	0.832	0.86														1.519
	307.765	357.757	154.664														79.062	104.541	46.513														0.619	0.411	0.898														1.564
	187.471	176.535	171.848														51.084	51.513	48.281														0.903	0.836	0.926														1.354
	271.833	245.274	174.973														62.422	60.351	51.513														0.877	0.846	0.829														1.087
	181.222	295.267	235.901														49.316	65.654	59.618														0.936	0.861	0.834														1.252
	309.327	423.372	159.35														70.224	76.688	47.852														0.788	0.905	0.875														1.617
	274.957	196.844	71.864														64.189	52.548	30.175														0.839	0.896	0.992														1.214
	228.09	417.123	187.471														55.351	77.724	67.296														0.936	0.868	0.52														1.117
	268.708	282.769	145.29														61.386	62.422	44.013														0.896	0.912	0.943														1.485
	218.716	287.455	184.346														56.083	64.189	52.119														0.874	0.877	0.853														1.31
	485.862	292.142	126.543														82.723	62.118	43.584														0.892	0.951	0.837														1.481
	187.471	240.588	192.158														51.513	56.083	53.583														0.888	0.961	0.841														1.775
	237.463	274.957	176.535														56.387	62.118	48.281														0.939	0.895	0.952														1.167
	181.222	310.889	117.169														51.084	65.957	41.513														0.873	0.898	0.854														1.704
	476.489	281.206	228.09														81.688	62.118	55.048														0.897	0.916	0.946														1.428
	412.436	557.726	93.735														76.259	89.794	33.711														0.891	0.869	1														1.27
	290.58	220.278	143.728														62.85	56.387	45.781														0.924	0.871	0.862														1.398
	603.032	174.973	184.346														89.491	48.584	50.048														0.946	0.932	0.925														1.175
	231.214	178.097	168.724														56.815	49.316	49.619														0.9	0.92	0.861														1.391
	207.78	184.346	146.852														53.583	51.084	47.548														0.909	0.888	0.816														1.523
	681.144	349.946	151.539														99.061	70.224	45.781														0.872	0.892	0.909														1.408
	159.35	239.025	128.105														46.816	56.083	44.316														0.914	0.955	0.82														1.633
	215.592	1090.46	168.724														54.316	130.575	53.887														0.918	0.804	0.73														1.585
			112.483																41.817																0.808
			134.354																45.049																0.832
			157.788																49.619																0.805
[truncated: 28 more columns]

## Sheet: Adhesion
Number of cells per well																Cell area
	A0			A0.1			A0.5			A5			A10				A0			A0.1			A0.5			A5			A10
P5	P10	P15	P5	P10	P15	P5	P10	P15	P5	P10	P15	P5	P10	P15		P5	P10	P15	P5	P10	P15	P5	P10	P15	P5	P10	P15	P5	P10	P15
183	184	37	314	125	40	398	211	62	222	170	46	361	219	99		724	82	237	1440	1103	222	539	829	330	1102	69	802	90	175	1387
652	119	54	514	124	77	278	255	50	256	147	84	165	258	95		454	477	643	1192	476	245	1468	679	795	290	327	188	679	229	596
544	172	49	489	188	115	296	208	56	186	220	51	250	321	89		78	1248	733	1009	710	442	1003	700	1137	1965	465	623	1349	374	53
681	53	49	408	87	120	318	99	88	180	149	147	327	274	132		651	909	56	69	699	51	794	618	727	921	576	884	50	200	2232
																395	63	373	574	243	920	708	584	288	335	454	546	442	374	54
																60	1820	194	2781	598	288	520	1468	465	113	445	790	1655	51	91
																316	54	639	528	65	106	2192	414	235	1709	709	169	441	726	51
																149	828	418	480	1583	104	443	4444	1287	124	612	266	985	402	74
																863	66	370	94	585	429	383	2481	201	248	448	94	1085	69	2690
																472	502	355	257	405	449	1312	650	640	702	618	555	391	602	709
																105	635	224	1043	1782	1029	649	361	788	445	128	750	636	638	615
																3760	187	74	719	651	342	1207	429	4915	1028	782	842	672	807	195
																58	651	69	341	65	91	115	701	64	350	275	456	2491	516	489
																1222	595	75	266	565	118	165	140	103	508	403	2801	692	1267	135
																423	558	63	74	720	377	522	354	168	374	309	679	931	630	1803
																211	88	79	659	1767	178	948	393	53	178	415	93	84	1001	2281
																194	778	194	909	609	1312	1062	954	227	650	1514	898	558	1431	843
																1791	126	104	796	381	60	644	560	271	1245	348	781	368	95	795
																1132	1550	453	1170	591	578	509	263	1169	611	296	1243	685	2103	958
																881	133	250	855	85	475	404	418	79	653	297	210	767	290	1010
																693	119	193	1076	183	589	376	259	385	211	244	448	777	427	96
																1028	896	62	1246	749	262	350	337	87	879	222	56	760	812	1235
																291	1011	71	945	535	965	72	259	823	628	501	535	307	547	70
																55	640	695	997	1499	107	1333	268	852	476	332	792	887	801	676
																67	1802	55	488	356	887	65	453	84	628	95	271	551	93	108
																50	604	1872	558	454	79	969	366	837	1128	797	209	966	282	53
																146	570	51	889	115	65	353	364	672	1517	1284	587	312	447	88
																187	440	270	1464	1036	179	501	568	262	1497	585	393	835	312	216
																978	960	196	903	529	971	411	97	146	738	314	1044	603	201	190
																896	2192	200	772	817	51	370	951	128	769	58	1084	1430	324	62
																109	2524	156	1526	801	1288	963	607	804	1466	245	852	150	1741	615
																188	565	68	973	156	666	556	546	139	778	413	3150	61	458	122
																799	549	500	361	386	260	473	392	109	189	512	780	813	65	55
																474	805	64	509	736	934	300	933	826	684	605	706	560	734	215
																479	1560	50	1065	389	919	634	373	2535	644	333	85	1511	52	698
																367	960	247	777	1051	1272	386	553	897	895	105	1473	1776	455	347
																300	532	743	476	361	842	55	372	74	728	150	661	770	672	1157
																1630	452	628	888	713	933	663	500	752	910	509	385	470	809	447
																191	647	498	546	1942	2108	600	1021	503	536	472	344	1434	421	523
																664	339	134	801	200	572	51	312	131	90	850	389	565	1090	4405
																302	620	426	992	581	747	158	258	751	523	496	1446	2642	329	638
																201	206	550	178	1083	181	1206	715	724	620	1017	811	812	2007	207
																389	510	220	955	136	795	644	275	453	621	601	506	154	448	524
																1656	574	95	1118	642	890	2918	401	483	766	1138	597	58	945	50
																466	1345	67	259	598	1559	1320	560	176	675	247	2686	1838	207	1452
																104	76	2557	986	730	137	942	1100	695	589	300	836	559	290	95
																53	68	141	495	92	824	1105	1004	1242	399	952	105	58	109	3373
																470	792	550	419	1122	410	635	188	1328	58	233	1483	907	466	91
																175	345	468	784	87	218	2814	425	790	937	219	158	95	799	62
																140	556	118	3651	413	449	2682	2566	203	1101	61	861	1345	473	79
																318	687	915	386	657	53	739	393	1502	540	310	683	1173	329	1075
																503	172	61	523	1503	306	95	305	756	824	444	97	1101	183	829
																108	1593	207	956	1222	693	1224	337	379	811	433	186	856	502	184
																231	651	301	376	693	1221	80	281	537	6334	324	961	1241	331	83
																542	710	688	609	771	131	801	511	546	508	345	391	69	97	1251
																995	68	56	955	148	169	656	507	335	284	271	2280	662	193	592
																237	247	2573	1328	867	69	482	1121	383	1005	2021	428	878	1558	1020
																818	747	381	1281	657	911	404	366	400	527	341	275	182	522	794
																344	293	133	640	1584	1616	825	507	210	1334	828	533	609	930	118
																451	1207	857	1161	780	618	1662	1197	405	927	666	826	714	108	272
																52	63	566	593	404	1332	2294	325	126	1228	491	627	819	133	62
																258	377	171	1358	395	266	975	111	398	1402	387	696	241	229	1060
																255	569	54	831	472	889	296	757	107	364	324	346	1102	866	51
																51	352	160	75	304	380	762	293	783	1096	387	668	50	634	3143
																69	2043	78	1341	581	949	423	369	730	706	434	980	149	1469	482
																440	598	197	542	1933	1415	435	918	121	670	248	1967	837	1396	548
																118	62	725	617	884	75	834	466	2788	565	541	52	1174	1941	1214
																460	668	292	299	427	80	541	134	667	159	468	373	449	370	96
																124	299	64	527	180	906	931	887	925	134	326	5415	526	911	123
																146	454	303	964	519	2462	1763	1080	1456	620	561	211	1374	583	883
																517	627	79	660	307	239	502	173	1707	687	1754	872	1402	454	513
																57	1394	160	1055	229	1599	579	228	422	1394	318	583	453	351	1993
																456	349	56	361	801	1545	332	507	1015	533	201	446	627	1155	566
																66	540	58	1502	482	235	439	399	2429	865	514	92	1043	508	57
																555	414	207	1074	110	52	407	1608	576	952	400	72	3426	513	828
																693	627	1700	137	416	1710	411	739	1016	501	564	876	873	158	441
																515	712	788	448	546	496	400	418	51	456	260	63	648	556	716
																708	753	490	750	692	516	434	384	357	742	490	880	499	331	927
																86	364	660	465	63	839	378	397	277	307	235	166	685	409	114
																707	239	178	795	237	894	1013	193	666	1208	509	464	1234	497	772
																57	398	117	602	2226	637	529	503	515	589	713	544	591	459	4833
																224	598	671	88	587	488	338	209	557	375	307	135	480	1053	186
																465	532	294	1006	914	837	653	58	1147	796	254	345	2526	184	1402
																463	1056	379	709	558	2134	1005	616	701	736	294	934	878	365	822
																1608	446	102	543	1528	1944	1063	430	4991	596	305	581	725	1035	1736
																86	608	59	287	904	817	169	297	69	583	317	532	1136	634	516
																599	554	103	439	1181	2106	462	61	1708	638	399	95	805	1149	492
																162	292	1059	686	1137	81	563	1003	816	579	520	445	1538	994	646
																912	373	356	1221	496	1010	746	338	2339	919	356	639	146	311	2108
																391	410	427	736	638	248	373	388	1359	446	504	589	505	372	432
																308	319	1075	652	548	1070	325	948	410	710	430	70	672	572	843
																1391	899	55	124	464	622	920	277	498	777	500	447	328	507	1017
																73	688	668	514	373	2033	533	635	891	342	239	1195	765	1167	748
																692	1657	73	409	82	746	558	234	72	636	206	763	737	307	1461
																250	870	310	507	231	648	515	451	445	442	307	1603	718	310	1198
																58	79	620	598	104	1015	369	718	1077	821	406	771	658	669	1970
																951	573	207	80	88	1080	366	555	1313	720	795	322	394	1003	51
																508	68	96	903	175	626	616	554	899	571	479	944	521	752	1468
																350	313	82	2045	463	235	340	532	204	495	432	1032	724	224	2205
																548	50	420	93	1334	814	517	205	268	651	108	196	511	302	381
																480	640	58	1199	2235	887	365	399	1611	815	185	744	415	257	100
																873	1993	1636	607	448	707	384	300	180	492	198	225	1075	707	231
																1161	859	52	749	960	353	454	527	410	760	118	96	846	613	87
																301	1106	829	240	825	414	513	500	686	591	296	3518	431	934	1134
																274	1001	515	621	415	971	409	552	207	457	382	870	532	1212	367
																659	324	290	136	1256	628	425	325	331	870	274	2368	858	75	278
																1017	180	921	1194	689	494	668	672	1365	69	350	679	588	591	1021
																1107	740	145	256	320	758	368	297	693	472	387	67	602	430	1192
																230	543	262	1372	620	1902	350	252	798	2945	310	54	430	453	844
																391	451	120	479	292	54	441	454	476	1280	193	682	281	194	353
																1197	1509	159	872	555	1055	213	759	505	630	116	468	481	1033	142
																216	585	63	1537	378	853	349	296	770	603	50	418	1194	764	269
																1115	542	695	422	319	1971	327	807	475	699	622	1141	1090	547	517
																269	2010	1402	690	296	2012	265	608	50	493	999	427	608	209	773
																1218	61	1582	696	956	50	295	789	443	529	71	1290	783	58	769
																246	1335	650	85	390	1813	298	619	495	113	406	332	585	553	1313
																517	1203	892	1073	434	1157	310	524	2345	374	228	717	649	229	614
																689	907	92	941	1955	632	330	632	3385	605	129	422	537	321	222
																472	89	616	484	697	535	574	398	166	1839	1597	52	961	321	815
																343	468	1251	676	824	1459	274	196	800	724	418	108	429	322	610
																394	609	65	620	1039	3442	487	248	947	437	538	617	334	378	1897
																1082	462	1183	705	659	398	251	532	165	661	834	668	642	769	1128
[truncated: 1,962 more rows]
